# Supplementary material for: Long noncoding RNA GAS5 inhibits progression of colorectal cancer by interacting with and triggering YAP phosphorylation and degradation and is negatively regulated by the m6A reader YTHDF3
Source: Springer Nature journal article supplement (doi:10.1186/s12943-019-1079-y), 2019-10-16
Supplement: MOESM2 [file 17279712]

## Antibodies, oligonucleotide sequences and primers for this study

| <b>Antibodies</b>                                                  | <b>SOURCE</b>             | <b>SPECIES REACTIVITY</b> |
|--------------------------------------------------------------------|---------------------------|---------------------------|
| YAP (D8H1X) XP® rabbit mAb                                         | Cell Signaling Technology | Human and mouse           |
| Rabbit monoclonal Anti-YAP1 antibody [EPR19812] (Alexa Fluor® 647) | abcam                     | Human and mouse           |
| GFP (4B10) mouse mAb                                               | Cell Signaling Technology | Human                     |
| LATS1 (C66B5) rabbit mAb                                           | Cell Signaling Technology | Human                     |
| Rabbit anti-14-3-3 (pan)                                           | Cell Signaling Technology | Human                     |
| TEAD1 (D9X2L) rabbit mAb                                           | Cell Signaling Technology | Human                     |
| Phospho-YAP (Ser127) (D9W2I) rabbit mAb                            | Cell Signaling Technology | Human and mouse           |
| CTGF (D8Z8U) rabbit mAb                                            | Cell Signaling Technology | Human                     |
| Ubiquitin (P4D1) mouse mAb                                         | Cell Signaling Technology | Human                     |
| Rabbit polyclonal anti-YTHDF3                                      | abcam                     | Human and mouse           |
| Mouse monoclonal anti-Lamin B1                                     | Proteintech               | Human                     |
| Mouse polyclonal anti-Ki67                                         | ZSGB-BIO                  | Human and mouse           |
| <b>Chemicals, Peptides, and Recombinant Proteins</b>               | <b>SOURCE</b>             | <b>IDENTIFIER</b>         |
| Recombinant Human YAP1 protein                                     | abcam                     | Cat#ab132459              |
| Cycloheximide                                                      | MedChemExpress            | Cat#HY-12320              |
| MG-132                                                             | Selleck                   | Cat#133407-82-6           |
| Actinomycin D                                                      | MedChemExpress            | Cat#HY-17559              |
| <b>Critical Commercial Assays</b>                                  | <b>SOURCE</b>             | <b>IDENTIFIER</b>         |
| Magna RIP™ RNA-Binding Protein Immunoprecipitation Kit             | Millipore                 | Cat# 17-701               |
| SMARTer® RACE 5'/3' Kit                                            | Clontech                  | Cat# 634858, 634859       |
| DIG Northern Starter Kit                                           | Roche                     | Cat# 12 039 672 910       |
| PARIS™ Kit                                                         | Invitrogen                | Cat# AM1921               |
| SimpleChIP® Enzymatic Chromatin IP Kit (Magnetic Beads)            | Cell Signaling Technology | Cat#9003                  |
| Dual-Glo® Luciferase Assay System                                  | Promega                   | Cat#E2920                 |
| m6A RNA Methylation Assay Kit (Colorimetric)                       | abcam                     | Cat# ab185912             |
| Magna MeRIP™ m6A Kit                                               | Millipore                 | Cat# 17-10499             |
| <b>Oligonucleotides</b>                                            |                           |                           |

|                                  |                                               |                               |
|----------------------------------|-----------------------------------------------|-------------------------------|
| LNA™ ISH probe: GAS5             | /5DigN/AAGCTGCATGCTTGCTTGT /3Dig_N/           |                               |
| <b>Primer name (for qRT-PCR)</b> | <b>Forward primer (5'-3')</b>                 | <b>Reverse primer (5'-3')</b> |
| YAP1 (NM_006106.5)               | TAGCCCTGCGTAGCCAGTTA                          | TCATGCTTAGTCCACTGTCTGT        |
| GAS5 (NR_002578.3)               | TATGGTGCTGGGTGCGGAT                           | CCAATGGCTTGAGTTAGGCTT         |
| YTHDF3 (NM_001277813.1)          | TCAGAGTAACAGCTATCCACCA                        | GGTTGTCAGATATGGCATA GGCT      |
| CTGF (NM_001901.3)               | CAGCATGGACGTTCTGCTG                           | AACCACGGTTTGGTCCTTG G         |
| CYR61 (NM_001554.5)              | CTGCCTTAGTCGTCACCC                            | CGCCGAAGTTGCATTCCAG           |
| GAPDH (NM_002046.7)              | AGCTGAACGGGAAGTCACT                           | TGCTTAGCCAAATTCGTTG           |
| <b>siRNA</b>                     | <b>Forward</b>                                | <b>Reverse</b>                |
| si-YAP1-1                        | GGUCAGAGAUACUUCUAAAU                          | UUAAGAAGUAUCUCUGACCAG         |
| si-YAP1-2                        | GGUGAUACUAUCAACCAAAGC                         | UUUGGUUGAUAGUAUCAC CUG        |
| si-GAS5-1                        | GCUCUGGAUAGCACCUUAUTT                         | AUAAGGUGCUAUCCAGAG CTT        |
| si-GAS5-2                        | CCAUUGGCACACAGGCAUUTT                         | AAUGCCUGUGUGCCAAUG GTT        |
| si-YTHDF3-1                      | GGUGGAUUUCACCAGUUA AUG                        | UUAACUGGUGAAAUCCACC AA        |
| si-YTHDF3-2                      | AGAUGGUGUAUUUAGUCAACC                         | UUGACUAAAUACACCAUCU GG        |
| <b>Recombinant DNA</b>           |                                               |                               |
| pcDNA3.1 (+) -YAP1-6xhis         | Shanghai Integrated Biotech Solutions Co.,Ltd | Lot No. M25539                |
| pCDH-MSCV-MCS-EF1-GFP-puro-YAP1  | Shanghai Integrated Biotech Solutions Co.,Ltd | Lot No. Y42526                |
| pcDNA3.1 (+) -GAS5               | Shanghai Integrated Biotech Solutions Co.,Ltd | Lot No. GB160612-K79827       |
| LV6-GAS5                         | Shanghai Integrated Biotech Solutions Co.,Ltd | Lot No. 180607EZ              |
| pCDH-CMV-MCS-EF1-Puro-YTHDF3     | Shanghai Integrated Biotech Solutions Co.,Ltd | Cat. # CD510B-1               |
