# Supplementary material for: Long noncoding RNA GAS5 inhibits progression of colorectal cancer by interacting with and triggering YAP phosphorylation and degradation and is negatively regulated by the m6A reader YTHDF3
Source: Springer Nature journal article supplement (doi:10.1186/s12943-019-1079-y), 2019-10-16
Supplement: MOESM3 [file 17279712]

Table S1. Relationship between lncRNA GAS5 expression and the clinical characteristics of CRC patients from Cohort 1

| Features           | n   | High | Low | $\chi^2$ | <i>p</i> -value |
|--------------------|-----|------|-----|----------|-----------------|
| All cases          | 208 | 60   | 148 |          |                 |
| Age                |     |      |     | 0.440    | 0.495           |
| < 50               | 2   | 1    | 1   |          |                 |
| ≥50                | 206 | 59   | 147 |          |                 |
| Gender             |     |      |     | 0.436    | 0.528           |
| Man                | 132 | 36   | 96  |          |                 |
| Female             | 76  | 24   | 52  |          |                 |
| Histological grade |     |      |     | 0.872    | 0.647           |
| Well               | 1   | 0    | 1   |          |                 |
| Moderately         | 155 | 43   | 112 |          |                 |
| Poorly             | 52  | 17   | 35  |          |                 |
| Tumor size(cm)     |     |      |     | 0.615    | 0.534           |
| <5                 | 85  | 22   | 63  |          |                 |
| ≥5                 | 123 | 38   | 85  |          |                 |
| Tumor metastasis   |     |      |     | 4.583    | <b>0.040*</b>   |
| Negative           | 129 | 44   | 85  |          |                 |
| Positive           | 79  | 16   | 63  |          |                 |
| TNM stage          |     |      |     | 4.525    | <b>0.038*</b>   |
| I and II           | 74  | 28   | 46  |          |                 |
| III and IV         | 134 | 32   | 102 |          |                 |

\**p* value < 0.05 was considered to indicate statistical significance. The *p* values were calculated in SPSS 19.0 using Pearson's chi-square test. Median score of GAS5 was used as cut-off value for analysis.

Table S2. Relationship between YAP expression and the clinical characteristics of CRC patients from Cohort 1

| Features           | n   | High | Low | $\chi^2$ | <i>p</i> -value |
|--------------------|-----|------|-----|----------|-----------------|
| All cases          | 208 | 80   | 128 |          |                 |
| Age                |     |      |     | 0.114    | 1.000           |
| < 50               | 2   | 1    | 1   |          |                 |
| ≥50                | 206 | 79   | 127 |          |                 |
| Gender             |     |      |     | 0.672    | 0.460           |
| Man                | 132 | 48   | 84  |          |                 |
| Female             | 76  | 32   | 44  |          |                 |
| Histological grade |     |      |     | 1.543    | 0.462           |
| Well               | 1   | 0    | 1   |          |                 |
| Moderately         | 155 | 57   | 98  |          |                 |
| Poorly             | 52  | 23   | 29  |          |                 |
| Tumor size(cm)     |     |      |     | 0.448    | 0.563           |
| <5                 | 85  | 35   | 50  |          |                 |
| ≥5                 | 123 | 45   | 78  |          |                 |
| Tumor metastasis   |     |      |     | 2.719    | 0.108           |
| Negative           | 129 | 44   | 85  |          |                 |
| Positive           | 79  | 36   | 43  |          |                 |
| TNM stage          |     |      |     | 4.934    | <b>0.037*</b>   |
| I and II           | 74  | 21   | 53  |          |                 |
| III and IV         | 134 | 59   | 75  |          |                 |

\**p* value < 0.05 was considered to indicate statistical significance. The *p* values were calculated in SPSS 19.0 using Pearson's chi-square test. Median score of YAP was used as cut-off value for analysis.

Table S3. Relationship between YTHDF3 expression and the clinical characteristics of CRC patients from Cohort 1

| Features           | n   | High | Low | $\chi^2$ | <i>p</i> -value |
|--------------------|-----|------|-----|----------|-----------------|
| All cases          | 208 | 97   | 111 |          |                 |
| Age                |     |      |     | 2.311    | 0.216           |
| < 50               | 2   | 2    | 0   |          |                 |
| ≥50                | 206 | 95   | 111 |          |                 |
| Gender             |     |      |     | 0.016    | 1.000           |
| Man                | 132 | 62   | 70  |          |                 |
| Female             | 76  | 35   | 41  |          |                 |
| Histological grade |     |      |     | 0.892    | 0.640           |
| Well               | 1   | 0    | 1   |          |                 |
| Moderately         | 155 | 73   | 82  |          |                 |
| Poorly             | 52  | 24   | 28  |          |                 |
| Tumor size(cm)     |     |      |     | 0.557    | 0.482           |
| <5                 | 85  | 37   | 48  |          |                 |
| ≥5                 | 123 | 60   | 63  |          |                 |
| Tumor metastasis   |     |      |     | 0.818    | 0.393           |
| Negative           | 129 | 57   | 72  |          |                 |
| Positive           | 79  | 40   | 39  |          |                 |
| TNM stage          |     |      |     | 4.753    | <b>0.031*</b>   |
| I and II           | 74  | 27   | 47  |          |                 |
| III and IV         | 134 | 70   | 64  |          |                 |

\**p* value < 0.05 was considered to indicate statistical significance. The *p* values were calculated in SPSS 19.0 using Pearson's chi-square test. Median score of YTHDF3 was used as cut-off value for analysis.
