# Supplementary material for: Long noncoding RNA GAS5 inhibits progression of colorectal cancer by interacting with and triggering YAP phosphorylation and degradation and is negatively regulated by the m6A reader YTHDF3
Source: Mol Cancer. 2019 Oct 16;18:143. doi: 10.1186/s12943-019-1079-y (PMC6794841; doi:10.1186/s12943-019-1079-y)
Supplement: Supplementary file 5 — Additional file 5: Supplementary raw data 2. Analysis of lncRNA-seq-based differential expression after knockdown of YTHDF3. [file 12943_2019_1079_MOESM5_ESM.xlsx]

## Sheet: Sheet1
chr	strand	start	end	t_name	t_biotype	num_exons	length	gene_id	gene_name	GO	KEGG	KO_ENTRY	EC	Description	FPKM.si6291_input	FPKM.si6292_input	FPKM.nc1_input	FPKM.nc2_input	fc	log2(fc)	pval	qval
chr3	+	184316192	184334908	ENST00000411531	protein_coding	30	4683	ENSG00000114867	EIF4G1	GO:0003723(RNA binding);GO:0016020(membrane);GO:0003743(translation initiation factor activity);GO:0006412(translation);GO:0006413(translational initiation);GO:0006446(regulation of translational initiation);GO:0005515(protein binding);GO:0008190(eukaryotic initiation factor 4E binding);GO:0005829(cytosol);GO:0045296(cadherin binding);GO:0043488(regulation of mRNA stability);GO:0000289(nuclear-tr…	03013(RNA transport);05416(Viral myocarditis)	NA	NA	eukaryotic translation initiation factor 4 gamma 1 [Source:HGNC Symbol;Acc:HGNC:3296]	0	0	41.7186	30.8484	-inf	-inf	3.78968e-21	1.77789e-16
chr8	-	143579736	143597415	ENST00000524624	protein_coding	8	1084	ENSG00000104529	EEF1D	GO:0005634(nucleus);GO:0005737(cytoplasm);GO:0006412(translation);GO:0005829(cytosol);GO:0006351(transcription, DNA-templated);GO:0006355(regulation of transcription, DNA-templated);GO:0003677(DNA binding);GO:0001650(fibrillar center);GO:0005783(endoplasmic reticulum);GO:0005515(protein binding);GO:0004871(signal transducer activity);GO:0003746(translation elongation factor activity);GO:0006414(t…	05168(Herpes simplex infection)	NA	NA	eukaryotic translation elongation factor 1 delta [Source:HGNC Symbol;Acc:HGNC:3211]	0	0	87.3309	64.568	-inf	-inf	1.38276e-17	1.62177e-13
chr7	+	139359912	139423151	ENST00000456182	nonsense_mediated_decay	11	2411	ENSG00000146963	LUC7L2	GO:0003723(RNA binding);GO:0003729(mRNA binding);GO:0005634(nucleus);GO:0016607(nuclear speck);GO:0005515(protein binding);GO:0005654(nucleoplasm);GO:0005685(U1 snRNP);GO:0006376(mRNA splice site selection);GO:0019899(enzyme binding);GO:0071004(U2-type prespliceosome)	NA	NA	NA	LUC7 like 2, pre-mRNA splicing factor [Source:HGNC Symbol;Acc:HGNC:21608]	0	0	30.3032	34.8961	-inf	-inf	1.93038e-17	1.81123e-13
chr17	+	30116829	30185193	ENST00000475652	nonsense_mediated_decay	8	1242	ENSG00000126653	NSRP1	GO:0003723(RNA binding);GO:0006397(mRNA processing);GO:0008380(RNA splicing);GO:0005634(nucleus);GO:0016607(nuclear speck);GO:0005654(nucleoplasm);GO:0030529(intracellular ribonucleoprotein complex);GO:0003729(mRNA binding);GO:0005515(protein binding);GO:0000381(regulation of alternative mRNA splicing, via spliceosome);GO:0006913(nucleocytoplasmic transport);GO:0032502(developmental process)	NA	NA	NA	nuclear speckle splicing regulatory protein 1 [Source:HGNC Symbol;Acc:HGNC:25305]	0	0	48.4264	57.9353	-inf	-inf	1.06288e-16	8.08691e-13
chr2	-	46901870	46941855	ENST00000444761	protein_coding	3	4169	ENSG00000180398	MCFD2	GO:0006810(transport);GO:0015031(protein transport);GO:0046872(metal ion binding);GO:0005509(calcium ion binding);GO:0005794(Golgi apparatus);GO:0005783(endoplasmic reticulum);GO:0016192(vesicle-mediated transport);GO:0000139(Golgi membrane);GO:0005789(endoplasmic reticulum membrane);GO:0006888(ER to Golgi vesicle-mediated transport);GO:0048208(COPII vesicle coating);GO:0012507(ER to Golgi transp…	NA	NA	NA	multiple coagulation factor deficiency 2 [Source:HGNC Symbol;Acc:HGNC:18451]	0	0	12.2875	24.168	-inf	-inf	1.20664e-16	8.08691e-13
chr22	+	41833164	41907306	ENST00000424354	nonsense_mediated_decay	22	5699	ENSG00000198911	SREBF2	GO:0090370(negative regulation of cholesterol efflux);GO:0005737(cytoplasm);GO:0005634(nucleus);GO:0016020(membrane);GO:0016021(integral component of membrane);GO:0043231(intracellular membrane-bounded organelle);GO:0005654(nucleoplasm);GO:0046983(protein dimerization activity);GO:0006351(transcription, DNA-templated);GO:0006355(regulation of transcription, DNA-templated);GO:0005739(mitochondrion…	NA	NA	NA	sterol regulatory element binding transcription factor 2 [Source:HGNC Symbol;Acc:HGNC:11290]	0	0	11.6538	10.6279	-inf	-inf	1.41547e-16	8.30069e-13
chr2	+	47403067	47483227	ENST00000543555	protein_coding	17	3024	ENSG00000095002	MSH2	GO:0005634(nucleus);GO:0016020(membrane);GO:0000166(nucleotide binding);GO:0005524(ATP binding);GO:0003677(DNA binding);GO:0005515(protein binding);GO:0006281(DNA repair);GO:0006974(cellular response to DNA damage stimulus);GO:0030983(mismatched DNA binding);GO:0006298(mismatch repair);GO:0032301(MutSalpha complex);GO:0005654(nucleoplasm);GO:0019901(protein kinase binding);GO:0006302(double-stran…	03430(Mismatch repair);05200(Pathways in cancer);05210(Colorectal cancer);01524(Platinum drug resistance)	K08735	NA	mutS homolog 2 [Source:HGNC Symbol;Acc:HGNC:7325]	0	0	24.5804	14.4156	-inf	-inf	6.52781e-16	3.40273e-12
chr4	-	52594178	52659290	ENST00000451218	protein_coding	8	4622	ENSG00000109189	USP46	GO:0046872(metal ion binding);GO:0016579(protein deubiquitination);GO:0016787(hydrolase activity);GO:0005515(protein binding);GO:0008233(peptidase activity);GO:0008234(cysteine-type peptidase activity);GO:0006508(proteolysis);GO:0006511(ubiquitin-dependent protein catabolic process);GO:0036459(thiol-dependent ubiquitinyl hydrolase activity);GO:0004843(thiol-dependent ubiquitin-specific protease a…	NA	NA	NA	ubiquitin specific peptidase 46 [Source:HGNC Symbol;Acc:HGNC:20075]	0	0	10.8853	13.0646	-inf	-inf	7.79417e-16	3.65401e-12
chr2	-	121337776	121649587	ENST00000409078	protein_coding	39	8002	ENSG00000074054	CLASP1	GO:0005737(cytoplasm);GO:0016020(membrane);GO:0005794(Golgi apparatus);GO:0051301(cell division);GO:0005694(chromosome);GO:0005856(cytoskeleton);GO:0005515(protein binding);GO:0007049(cell cycle);GO:0005874(microtubule);GO:0005925(focal adhesion);GO:0008017(microtubule binding);GO:0005813(centrosome);GO:0005815(microtubule organizing center);GO:0005819(spindle);GO:0000775(chromosome, centromeric …	NA	NA	NA	cytoplasmic linker associated protein 1 [Source:HGNC Symbol;Acc:HGNC:17088]	0	0	6.87824	3.8143	-inf	-inf	4.12392e-14	1.13806e-10
chr1	+	43979436	43991168	ENST00000434555	protein_coding	7	1923	ENSG00000117411	B4GALT2	GO:0016020(membrane);GO:0016021(integral component of membrane);GO:0005794(Golgi apparatus);GO:0043231(intracellular membrane-bounded organelle);GO:0046872(metal ion binding);GO:0005654(nucleoplasm);GO:0016740(transferase activity);GO:0016757(transferase activity, transferring glycosyl groups);GO:0005975(carbohydrate metabolic process);GO:0006486(protein glycosylation);GO:0032580(Golgi cisterna m…	00052(Galactose metabolism);00510(N-Glycan biosynthesis);00515(Mannose type O-glycan biosyntheis);00514(Other types of O-glycan biosynthesis);00533(Glycosaminoglycan biosynthesis - keratan sulfate);00601(Glycosphingolipid biosynthesis - lacto and neolacto series)	NA	NA	beta-1,4-galactosyltransferase 2 [Source:HGNC Symbol;Acc:HGNC:925]	0	0	27.7216	13.5272	-inf	-inf	1.88792e-13	4.66156e-10
chr19	+	40348678	40378475	ENST00000409419	protein_coding	12	1966	ENSG00000105223	PLD3	GO:0016020(membrane);GO:0016021(integral component of membrane);GO:0016787(hydrolase activity);GO:0003824(catalytic activity);GO:0006629(lipid metabolic process);GO:0016042(lipid catabolic process);GO:0005783(endoplasmic reticulum);GO:0005789(endoplasmic reticulum membrane);GO:0005515(protein binding);GO:0070062(extracellular exosome);GO:0004630(phospholipase D activity);GO:0070290(N-acylphosphat…	00564(Glycerophospholipid metabolism);00565(Ether lipid metabolism)	K16860	EC:3.1.4.4	phospholipase D family member 3 [Source:HGNC Symbol;Acc:HGNC:17158]	0	0	19.5519	15.1415	-inf	-inf	6.65373e-13	1.24861e-09
chr15	-	25339137	25438513	ENST00000397954	protein_coding	14	2873	ENSG00000114062	UBE3A	GO:0016567(protein ubiquitination);GO:0004842(ubiquitin-protein transferase activity);GO:0005634(nucleus);GO:0005737(cytoplasm);GO:0046872(metal ion binding);GO:0016740(transferase activity);GO:0016874(ligase activity);GO:0005515(protein binding);GO:0000502(proteasome complex);GO:0048511(rhythmic process);GO:0061630(ubiquitin protein ligase activity);GO:0006511(ubiquitin-dependent protein catabol…	04120(Ubiquitin mediated proteolysis);05203(Viral carcinogenesis);05165(Human papillomavirus infection)	K10587	EC:2.3.2.26	ubiquitin protein ligase E3A [Source:HGNC Symbol;Acc:HGNC:12496]	0	0	10.7805	10.9684	-inf	-inf	1.68204e-12	2.81826e-09
chr11	-	90201449	90223059	ENST00000457199	protein_coding	10	2003	ENSG00000110172	CHORDC1	GO:0046872(metal ion binding);GO:0005515(protein binding);GO:0005575(cellular_component);GO:0061077(chaperone-mediated protein folding);GO:0051879(Hsp90 protein binding);GO:1900034(regulation of cellular response to heat);GO:0005524(ATP binding);GO:0008270(zinc ion binding);GO:0043531(ADP binding);GO:0010824(regulation of centrosome duplication);GO:2000299(negative regulation of Rho-dependent pro…	NA	NA	NA	cysteine and histidine rich domain containing 1 [Source:HGNC Symbol;Acc:HGNC:14525]	0	0	4.84219	26.2532	-inf	-inf	7.60684e-11	9.64506e-08
chr22	+	46626761	46679790	ENST00000361034	protein_coding	18	4315	ENSG00000075240	GRAMD4	GO:0016020(membrane);GO:0016021(integral component of membrane);GO:0005739(mitochondrion);GO:0006915(apoptotic process);GO:0031966(mitochondrial membrane)	NA	NA	NA	GRAM domain containing 4 [Source:HGNC Symbol;Acc:HGNC:29113]	0	0	4.7428	3.11631	-inf	-inf	6.03802e-10	6.15799e-07
chr20	-	17942138	17954024	ENST00000476648	processed_transcript	9	950	ENSG00000089006	SNX5	GO:0006810(transport);GO:0005737(cytoplasm);GO:0016020(membrane);GO:0006886(intracellular protein transport);GO:0015031(protein transport);GO:0005829(cytosol);GO:0005886(plasma membrane);GO:0042995(cell projection);GO:0005515(protein binding);GO:0030659(cytoplasmic vesicle membrane);GO:0031410(cytoplasmic vesicle);GO:0035091(phosphatidylinositol binding);GO:0006907(pinocytosis);GO:0008289(lipid b…	04144(Endocytosis)	NA	NA	sorting nexin 5 [Source:HGNC Symbol;Acc:HGNC:14969]	0	0	25.5489	10.5304	-inf	-inf	1.08244e-09	9.76571e-07
chr6	+	147204533	147384755	ENST00000367480	protein_coding	25	3297	ENSG00000164506	STXBP5	GO:0006810(transport);GO:0005737(cytoplasm);GO:0016020(membrane);GO:0016021(integral component of membrane);GO:0015031(protein transport);GO:0016192(vesicle-mediated transport);GO:0005829(cytosol);GO:0005886(plasma membrane);GO:0043547(positive regulation of GTPase activity);GO:0030054(cell junction);GO:0045202(synapse);GO:0030659(cytoplasmic vesicle membrane);GO:0031410(cytoplasmic vesicle);GO:0…	NA	NA	NA	syntaxin binding protein 5 [Source:HGNC Symbol;Acc:HGNC:19665]	0	0	4.48464	4.3099	-inf	-inf	1.47333e-09	1.21262e-06
chr10	-	114431113	114684457	ENST00000392955	protein_coding	23	7408	ENSG00000099204	ABLIM1	GO:0005737(cytoplasm);GO:0046872(metal ion binding);GO:0003779(actin binding);GO:0005856(cytoskeleton);GO:0005515(protein binding);GO:0007010(cytoskeleton organization);GO:0007601(visual perception);GO:0015629(actin cytoskeleton);GO:0009887(animal organ morphogenesis);GO:0030032(lamellipodium assembly);GO:0060271(cilium assembly);GO:0001725(stress fiber);GO:0030027(lamellipodium)	04360(Axon guidance)	K07520	NA	actin binding LIM protein 1 [Source:HGNC Symbol;Acc:HGNC:78]	0	0	0.3064	15.0692	-inf	-inf	1.80537e-09	1.38848e-06
chr5	+	163437614	163443892	ENST00000510664	protein_coding	7	994	ENSG00000113328	CCNG1	GO:0005634(nucleus);GO:0051301(cell division);GO:0005515(protein binding);GO:0007049(cell cycle);GO:0051726(regulation of cell cycle);GO:0005654(nucleoplasm);GO:0000079(regulation of cyclin-dependent protein serine/threonine kinase activity)	04115(p53 signaling pathway);05206(MicroRNAs in cancer)	NA	NA	cyclin G1 [Source:HGNC Symbol;Acc:HGNC:1592]	0	0	8.05087	26.9016	-inf	-inf	1.90512e-09	1.44156e-06
chr19	-	14478004	14479857	ENST00000589631	protein_coding	4	799	ENSG00000123159	GIPC1	GO:0005737(cytoplasm);GO:0016020(membrane);GO:0005829(cytosol);GO:0005515(protein binding);GO:0007186(G-protein coupled receptor signaling pathway);GO:0031410(cytoplasmic vesicle);GO:0003779(actin binding);GO:0017022(myosin binding);GO:0030165(PDZ domain binding);GO:0042803(protein homodimerization activity);GO:0006605(protein targeting);GO:0007268(chemical synaptic transmission);GO:0014047(gluta…	NA	NA	NA	GIPC PDZ domain containing family member 1 [Source:HGNC Symbol;Acc:HGNC:1226]	0	0	28.9181	10.5841	-inf	-inf	2.14296e-09	1.56986e-06
chr17	-	44798448	44830813	ENST00000590758	protein_coding	2	7566	ENSG00000182963	GJC1	GO:0016020(membrane);GO:0016021(integral component of membrane);GO:0005886(plasma membrane);GO:0005921(gap junction);GO:0030054(cell junction);GO:0007154(cell communication);GO:0005922(connexin complex);GO:0034220(ion transmembrane transport);GO:0005789(endoplasmic reticulum membrane);GO:0006810(transport);GO:0006936(muscle contraction);GO:0014704(intercalated disc);GO:0016264(gap junction assemb…	NA	NA	NA	gap junction protein gamma 1 [Source:HGNC Symbol;Acc:HGNC:4280]	0	0	1.90729	1.687	-inf	-inf	2.19954e-09	1.56986e-06
chr3	+	49007393	49015953	ENST00000608424	protein_coding	6	4070	ENSG00000178252	WDR6	GO:0005829(cytosol);GO:0005886(plasma membrane);GO:0043560(insulin receptor substrate binding);GO:0043234(protein complex);GO:0010507(negative regulation of autophagy);GO:0003723(RNA binding);GO:0005737(cytoplasm);GO:0005515(protein binding);GO:0007049(cell cycle);GO:0008285(negative regulation of cell proliferation);GO:0008180(COP9 signalosome);GO:0007050(cell cycle arrest)	NA	NA	NA	WD repeat domain 6 [Source:HGNC Symbol;Acc:HGNC:12758]	0	0	3.28793	3.43924	-inf	-inf	2.20853e-09	1.56986e-06
chr18	+	51047047	51078467	ENST00000592186	nonsense_mediated_decay	9	1306	ENSG00000141646	SMAD4	GO:0005634(nucleus);GO:0006355(regulation of transcription, DNA-templated);GO:0006351(transcription, DNA-templated);GO:0003700(transcription factor activity, sequence-specific DNA binding);GO:0005622(intracellular);GO:0007179(transforming growth factor beta receptor signaling pathway);GO:0005667(transcription factor complex);GO:0010718(positive regulation of epithelial to mesenchymal transition);…	04310(Wnt signaling pathway);04350(TGF-beta signaling pathway);04390(Hippo signaling pathway);04371(Apelin signaling pathway);04068(FoxO signaling pathway);04110(Cell cycle);04520(Adherens junction);04550(Signaling pathways regulating pluripotency of stem cells);04659(Th17 cell differentiation);05200(Pathways in cancer);05210(Colorectal cancer);05212(Pancreatic cancer);05225(Hepatocellular carcin…	NA	NA	SMAD family member 4 [Source:HGNC Symbol;Acc:HGNC:6770]	0	0	10.2406	10.1368	-inf	-inf	2.38231e-09	1.66811e-06
chr1	-	31727411	31756801	ENST00000398538	protein_coding	29	4675	ENSG00000121753	ADGRB2	GO:0016020(membrane);GO:0016021(integral component of membrane);GO:0004930(G-protein coupled receptor activity);GO:0007186(G-protein coupled receptor signaling pathway);GO:0004888(transmembrane signaling receptor activity);GO:0007166(cell surface receptor signaling pathway);GO:0016525(negative regulation of angiogenesis);GO:0005886(plasma membrane);GO:0004871(signal transducer activity);GO:000716…	NA	NA	NA	adhesion G protein-coupled receptor B2 [Source:HGNC Symbol;Acc:HGNC:944]	0	0	2.94024	2.50552	-inf	-inf	3.30977e-09	2.28345e-06
chr20	+	44966479	45079948	ENST00000499879	protein_coding	10	6161	ENSG00000101109	STK4	GO:0090090(negative regulation of canonical Wnt signaling pathway);GO:0005634(nucleus);GO:0005737(cytoplasm);GO:0046872(metal ion binding);GO:0000166(nucleotide binding);GO:0004672(protein kinase activity);GO:0004674(protein serine/threonine kinase activity);GO:0005524(ATP binding);GO:0006468(protein phosphorylation);GO:0005829(cytosol);GO:0005654(nucleoplasm);GO:0016740(transferase activity);GO:…	04014(Ras signaling pathway);04010(MAPK signaling pathway);04068(FoxO signaling pathway);05200(Pathways in cancer);05223(Non-small cell lung cancer)	NA	NA	serine/threonine kinase 4 [Source:HGNC Symbol;Acc:HGNC:11408]	0	0	1.4465	3.03707	-inf	-inf	3.71384e-09	2.45396e-06
chr13	-	113455819	113490691	ENST00000332592	protein_coding	5	2626	ENSG00000150401	DCUN1D2	GO:0000151(ubiquitin ligase complex);GO:0031624(ubiquitin conjugating enzyme binding);GO:0097602(cullin family protein binding);GO:0032182(ubiquitin-like protein binding);GO:0045116(protein neddylation);GO:0051443(positive regulation of ubiquitin-protein transferase activity)	NA	NA	NA	defective in cullin neddylation 1 domain containing 2 [Source:HGNC Symbol;Acc:HGNC:20328]	0	0	4.43784	4.63274	-inf	-inf	4.0268e-09	2.54822e-06
chr14	+	75745130	75887307	ENST00000556893	protein_coding	17	3071	ENSG00000119685	TTLL5	GO:0005829(cytosol);GO:0005886(plasma membrane);GO:0006464(cellular protein modification process);GO:0005634(nucleus);GO:0005737(cytoplasm);GO:0000166(nucleotide binding);GO:0005524(ATP binding);GO:0006351(transcription, DNA-templated);GO:0005856(cytoskeleton);GO:0042995(cell projection);GO:0016874(ligase activity);GO:0005874(microtubule);GO:0005813(centrosome);GO:0005929(cilium);GO:0070740(tubul…	NA	NA	NA	tubulin tyrosine ligase like 5 [Source:HGNC Symbol;Acc:HGNC:19963]	0	0	3.10778	4.48474	-inf	-inf	4.94627e-09	2.72999e-06
chr14	-	67338251	67359787	ENST00000555431	protein_coding	8	1085	ENSG00000100554	ATP6V1D	GO:0006810(transport);GO:0016020(membrane);GO:0005765(lysosomal membrane);GO:0055085(transmembrane transport);GO:0006811(ion transport);GO:0005515(protein binding);GO:0015992(proton transport);GO:0042626(ATPase activity, coupled to transmembrane movement of substances);GO:0005813(centrosome);GO:0005886(plasma membrane);GO:0060271(cilium assembly);GO:0005929(cilium);GO:0005829(cytosol);GO:0070062(…	00190(Oxidative phosphorylation);04150(mTOR signaling pathway);04145(Phagosome);04966(Collecting duct acid secretion);04721(Synaptic vesicle cycle);05323(Rheumatoid arthritis);05110(Vibrio cholerae infection);05120(Epithelial cell signaling in Helicobacter pylori infection)	NA	NA	ATPase H+ transporting V1 subunit D [Source:HGNC Symbol;Acc:HGNC:13527]	0	0	7.98907	11.6724	-inf	-inf	6.61614e-09	3.41088e-06
chrX	-	101009542	101052070	ENST00000372935	protein_coding	14	2921	ENSG00000188917	TRMT2B	GO:0006396(RNA processing);GO:0008168(methyltransferase activity);GO:0016740(transferase activity);GO:0008033(tRNA processing);GO:0032259(methylation);GO:0005515(protein binding);GO:0008173(RNA methyltransferase activity);GO:0001510(RNA methylation);GO:0030697(S-adenosylmethionine-dependent tRNA (m5U54) methyltransferase activity);GO:0005739(mitochondrion)	NA	NA	NA	tRNA methyltransferase 2 homolog B [Source:HGNC Symbol;Acc:HGNC:25748]	0	0	2.93554	2.89636	-inf	-inf	1.26215e-08	6.04211e-06
chr7	+	7566872	7607496	ENST00000340080	protein_coding	13	3453	ENSG00000164654	MIOS	GO:0016020(membrane);GO:0005765(lysosomal membrane);GO:0005764(lysosome);GO:0005515(protein binding);GO:0034198(cellular response to amino acid starvation);GO:0034629(cellular protein complex localization);GO:0032008(positive regulation of TOR signaling);GO:0061700(GATOR2 complex)	04150(mTOR signaling pathway)	K20407	NA	meiosis regulator for oocyte development [Source:HGNC Symbol;Acc:HGNC:21905]	0	0	1.58757	5.70784	-inf	-inf	1.42414e-08	6.6812e-06
chr2	+	74529725	74533152	ENST00000462909	processed_transcript	9	1294	ENSG00000115317	HTRA2	GO:0043065(positive regulation of apoptotic process);GO:0005634(nucleus);GO:0016020(membrane);GO:0016021(integral component of membrane);GO:0016787(hydrolase activity);GO:0005739(mitochondrion);GO:0005829(cytosol);GO:0005783(endoplasmic reticulum);GO:0005789(endoplasmic reticulum membrane);GO:0005515(protein binding);GO:0008233(peptidase activity);GO:0006508(proteolysis);GO:0004252(serine-type en…	04210(Apoptosis);04215(Apoptosis - multiple species);05012(Parkinson's disease)	NA	NA	HtrA serine peptidase 2 [Source:HGNC Symbol;Acc:HGNC:14348]	0	0	6.33994	6.15756	-inf	-inf	1.46174e-08	6.76252e-06
chr17	-	38541281	38563424	ENST00000622190	protein_coding	15	4635	ENSG00000277363	SRCIN1	GO:0005737(cytoplasm);GO:0016020(membrane);GO:0005886(plasma membrane);GO:0005856(cytoskeleton);GO:0042995(cell projection);GO:0005515(protein binding);GO:0030054(cell junction);GO:0045202(synapse);GO:0045211(postsynaptic membrane);GO:0030425(dendrite);GO:0030334(regulation of cell migration);GO:0034446(substrate adhesion-dependent cell spreading);GO:0061001(regulation of dendritic spine morphoge…	NA	NA	NA	SRC kinase signaling inhibitor 1 [Source:HGNC Symbol;Acc:HGNC:29506]	0	0	2.47168	1.32509	-inf	-inf	1.79211e-08	7.7133e-06
chr1	-	21596221	21620041	ENST00000374763	protein_coding	23	3334	ENSG00000076864	RAP1GAP	GO:0030695(GTPase regulator activity);GO:0050790(regulation of catalytic activity);GO:0043547(positive regulation of GTPase activity);GO:0005096(GTPase activator activity);GO:0051056(regulation of small GTPase mediated signal transduction);GO:0045665(negative regulation of neuron differentiation);GO:1904425(negative regulation of GTP binding);GO:1904442(negative regulation of thyroid gland epithe…	04015(Rap1 signaling pathway)	K17700	NA	RAP1 GTPase activating protein [Source:HGNC Symbol;Acc:HGNC:9858]	0	0	2.38865	1.87559	-inf	-inf	2.23537e-08	8.83444e-06
chr17	-	28879341	28897652	ENST00000577789	processed_transcript	10	2503	ENSG00000132589	FLOT2	GO:0016020(membrane);GO:0002020(protease binding);GO:0035255(ionotropic glutamate receptor binding);GO:0045661(regulation of myoblast differentiation);GO:0002080(acrosomal membrane);GO:0005901(caveola);GO:0016600(flotillin complex);GO:0031410(cytoplasmic vesicle);GO:0045121(membrane raft);GO:0007155(cell adhesion);GO:0005886(plasma membrane);GO:0005515(protein binding);GO:0048471(perinuclear regi…	04910(Insulin signaling pathway)	NA	NA	flotillin 2 [Source:HGNC Symbol;Acc:HGNC:3758]	0	0	3.49143	2.40419	-inf	-inf	2.24055e-08	8.83444e-06
chr1	+	89524903	89597864	ENST00000330947	protein_coding	6	7593	ENSG00000197147	LRRC8B	GO:0016020(membrane);GO:0016021(integral component of membrane);GO:0006810(transport);GO:0005737(cytoplasm);GO:0005783(endoplasmic reticulum);GO:0005789(endoplasmic reticulum membrane);GO:0006811(ion transport);GO:0005886(plasma membrane);GO:0005515(protein binding);GO:0007165(signal transduction);GO:0055085(transmembrane transport);GO:0005225(volume-sensitive anion channel activity);GO:0044070(r…	NA	NA	NA	leucine rich repeat containing 8 family member B [Source:HGNC Symbol;Acc:HGNC:30692]	0	0	0.85	1.01234	-inf	-inf	2.24569e-08	8.83444e-06
chr2	+	241356289	241465778	ENST00000627550	protein_coding	18	2122	ENSG00000006607	FARP2	GO:0007155(cell adhesion);GO:0005089(Rho guanyl-nucleotide exchange factor activity);GO:0035023(regulation of Rho protein signal transduction);GO:0043547(positive regulation of GTPase activity);GO:0005856(cytoskeleton);GO:0008092(cytoskeletal protein binding);GO:0005085(guanyl-nucleotide exchange factor activity);GO:0005829(cytosol);GO:0071800(podosome assembly);GO:0005737(cytoplasm);GO:0030316(o…	04015(Rap1 signaling pathway);04520(Adherens junction)	K06082	NA	FERM, ARH/RhoGEF and pleckstrin domain protein 2 [Source:HGNC Symbol;Acc:HGNC:16460]	0	0	2.86302	3.27869	-inf	-inf	2.27608e-08	8.83444e-06
chr6	-	131586749	131628229	ENST00000368060	protein_coding	30	4446	ENSG00000112282	MED23	GO:0005634(nucleus);GO:0006351(transcription, DNA-templated);GO:0006355(regulation of transcription, DNA-templated);GO:0005515(protein binding);GO:0005654(nucleoplasm);GO:0003713(transcription coactivator activity);GO:0006367(transcription initiation from RNA polymerase II promoter);GO:0005667(transcription factor complex);GO:0006357(regulation of transcription from RNA polymerase II promoter)	NA	NA	NA	mediator complex subunit 23 [Source:HGNC Symbol;Acc:HGNC:2372]	0	0	1.52676	1.61301	-inf	-inf	2.27857e-08	8.83444e-06
chr8	-	98189833	98294336	ENST00000430223	protein_coding	11	4496	ENSG00000104361	NIPAL2	GO:0016020(membrane);GO:0016021(integral component of membrane);GO:0015095(magnesium ion transmembrane transporter activity);GO:0015693(magnesium ion transport);GO:1903830(magnesium ion transmembrane transport)	NA	NA	NA	NIPA like domain containing 2 [Source:HGNC Symbol;Acc:HGNC:25854]	0	0	1.3581	1.71411	-inf	-inf	2.36981e-08	9.03879e-06
chr19	+	50188186	50309790	ENST00000598205	protein_coding	42	6137	ENSG00000105357	MYH14	GO:0016020(membrane);GO:0000166(nucleotide binding);GO:0005524(ATP binding);GO:0003774(motor activity);GO:0016459(myosin complex);GO:0003779(actin binding);GO:0005516(calmodulin binding);GO:0005829(cytosol);GO:0051015(actin filament binding);GO:0070062(extracellular exosome);GO:0003009(skeletal muscle contraction);GO:0016887(ATPase activity);GO:0007605(sensory perception of sound);GO:0008360(regu…	04530(Tight junction);04810(Regulation of actin cytoskeleton);05132(Salmonella infection)	NA	NA	myosin heavy chain 14 [Source:HGNC Symbol;Acc:HGNC:23212]	0	0	1.17165	0.990194	-inf	-inf	2.39202e-08	9.04993e-06
chr4	+	146175748	146190187	ENST00000504181	nonsense_mediated_decay	5	549	ENSG00000164167	LSM6	GO:0003723(RNA binding);GO:0006397(mRNA processing);GO:0008380(RNA splicing);GO:0005634(nucleus);GO:0005737(cytoplasm);GO:0008033(tRNA processing);GO:0030529(intracellular ribonucleoprotein complex);GO:0005515(protein binding);GO:0005681(spliceosomal complex);GO:0000398(mRNA splicing, via spliceosome);GO:0006364(rRNA processing);GO:0005730(nucleolus);GO:0005654(nucleoplasm);GO:0005829(cytosol);GO…	03040(Spliceosome);03018(RNA degradation)	NA	NA	LSM6 homolog, U6 small nuclear RNA and mRNA degradation associated [Source:HGNC Symbol;Acc:HGNC:17017]	0	0	16.7051	9.37111	-inf	-inf	2.73681e-08	1.01059e-05
chr10	-	14520851	14572189	ENST00000378458	protein_coding	5	1284	ENSG00000065809	FAM107B	NA	NA	NA	NA	family with sequence similarity 107 member B [Source:HGNC Symbol;Acc:HGNC:23726]	0	0	4.25929	3.8079	-inf	-inf	3.69826e-08	1.27574e-05
chr2	+	231056867	231165235	ENST00000431051	nonsense_mediated_decay	21	2506	ENSG00000173692	PSMD1	GO:0016020(membrane);GO:0000502(proteasome complex);GO:0038095(Fc-epsilon receptor signaling pathway);GO:0005576(extracellular region);GO:0005634(nucleus);GO:0030234(enzyme regulator activity);GO:0042176(regulation of protein catabolic process);GO:0004175(endopeptidase activity);GO:0043161(proteasome-mediated ubiquitin-dependent protein catabolic process);GO:0005654(nucleoplasm);GO:0005829(cytoso…	03050(Proteasome);05169(Epstein-Barr virus infection)	NA	NA	proteasome 26S subunit, non-ATPase 1 [Source:HGNC Symbol;Acc:HGNC:9554]	0	0	2.04456	2.2064	-inf	-inf	3.73387e-08	1.27862e-05
chr12	-	111360680	111363749	ENST00000547838	protein_coding	2	2846	ENSG00000198324	FAM109A	GO:0005829(cytosol);GO:0005794(Golgi apparatus);GO:0042803(protein homodimerization activity);GO:0031410(cytoplasmic vesicle);GO:0005515(protein binding);GO:0005768(endosome);GO:0005802(trans-Golgi network);GO:0005769(early endosome);GO:0042147(retrograde transport, endosome to Golgi);GO:0055037(recycling endosome);GO:0030136(clathrin-coated vesicle);GO:0007032(endosome organization);GO:0001881(r…	NA	NA	NA	family with sequence similarity 109 member A [Source:HGNC Symbol;Acc:HGNC:26509]	0	0	1.86866	1.54917	-inf	-inf	3.90948e-08	1.31169e-05
chr10	-	49734644	49762379	ENST00000419399	protein_coding	22	3588	ENSG00000197444	OGDHL	GO:0046872(metal ion binding);GO:0016491(oxidoreductase activity);GO:0055114(oxidation-reduction process);GO:0006099(tricarboxylic acid cycle);GO:0006096(glycolytic process);GO:0008152(metabolic process);GO:0005739(mitochondrion);GO:0016624(oxidoreductase activity, acting on the aldehyde or oxo group of donors, disulfide as acceptor);GO:0005515(protein binding);GO:0005759(mitochondrial matrix);GO…	00020(Citrate cycle (TCA cycle));00310(Lysine degradation);00380(Tryptophan metabolism)	K00164	EC:1.2.4.2	oxoglutarate dehydrogenase like [Source:HGNC Symbol;Acc:HGNC:25590]	0	0	1.26531	1.63321	-inf	-inf	3.92387e-08	1.31169e-05
chr2	-	96021947	96034925	ENST00000453542	protein_coding	21	2466	ENSG00000186281	GPAT2	GO:0016020(membrane);GO:0016021(integral component of membrane);GO:0016740(transferase activity);GO:0016746(transferase activity, transferring acyl groups);GO:0006629(lipid metabolic process);GO:0008152(metabolic process);GO:0005739(mitochondrion);GO:0008654(phospholipid biosynthetic process);GO:0005741(mitochondrial outer membrane);GO:0016024(CDP-diacylglycerol biosynthetic process);GO:0008374(O…	00561(Glycerolipid metabolism);00564(Glycerophospholipid metabolism)	K00629	EC:2.3.1.15	glycerol-3-phosphate acyltransferase 2, mitochondrial [Source:HGNC Symbol;Acc:HGNC:27168]	0	0	1.85257	1.87411	-inf	-inf	4.05496e-08	1.32043e-05
chr3	+	190563941	190651518	ENST00000412504	protein_coding	10	4875	ENSG00000196083	IL1RAP	GO:0016020(membrane);GO:0016021(integral component of membrane);GO:0007165(signal transduction);GO:0005886(plasma membrane);GO:0005576(extracellular region);GO:0002376(immune system process);GO:0045087(innate immune response);GO:0006954(inflammatory response);GO:0005887(integral component of plasma membrane);GO:0004908(interleukin-1 receptor activity);GO:0004871(signal transducer activity);GO:000…	04010(MAPK signaling pathway);04060(Cytokine-cytokine receptor interaction);04659(Th17 cell differentiation);04750(Inflammatory mediator regulation of TRP channels)	NA	NA	interleukin 1 receptor accessory protein [Source:HGNC Symbol;Acc:HGNC:5995]	0	0	0.912284	0.885982	-inf	-inf	4.30177e-08	1.37478e-05
chr3	-	130708322	130723815	ENST00000508273	protein_coding	5	817	ENSG00000196455	PIK3R4	GO:0016020(membrane);GO:0043231(intracellular membrane-bounded organelle);GO:0000166(nucleotide binding);GO:0004672(protein kinase activity);GO:0004674(protein serine/threonine kinase activity);GO:0005524(ATP binding);GO:0006468(protein phosphorylation);GO:0016740(transferase activity);GO:0016301(kinase activity);GO:0016310(phosphorylation);GO:0015630(microtubule cytoskeleton);GO:0005515(protein …	04371(Apelin signaling pathway);04140(Autophagy - animal);04136(Autophagy - other eukaryotes)	NA	NA	phosphoinositide-3-kinase regulatory subunit 4 [Source:HGNC Symbol;Acc:HGNC:8982]	0	0	5.13794	5.90679	-inf	-inf	4.49671e-08	1.38016e-05
chr1	+	119711934	119744212	ENST00000369409	protein_coding	12	1882	ENSG00000092621	PHGDH	GO:0010468(regulation of gene expression);GO:0043209(myelin sheath);GO:0031175(neuron projection development);GO:0004617(phosphoglycerate dehydrogenase activity);GO:0006541(glutamine metabolic process);GO:0006544(glycine metabolic process);GO:0006563(L-serine metabolic process);GO:0006566(threonine metabolic process);GO:0009448(gamma-aminobutyric acid metabolic process);GO:0019530(taurine metabol…	00260(Glycine, serine and threonine metabolism)	NA	NA	phosphoglycerate dehydrogenase [Source:HGNC Symbol;Acc:HGNC:8923]	0	0	2.08745	2.2604	-inf	-inf	4.51755e-08	1.38016e-05
chr11	-	124789240	124792818	ENST00000638898	sense_intronic	1	3579	ENSG00000279342	AP000866.6	NA	NA	NA	NA	NA	0	0	1.18813	1.1625	-inf	-inf	4.52905e-08	1.38016e-05
chr19	+	4640017	4655568	ENST00000536716	protein_coding	2	3845	ENSG00000185361	TNFAIP8L1	GO:0005737(cytoplasm);GO:0005515(protein binding);GO:0032007(negative regulation of TOR signaling)	NA	NA	NA	TNF alpha induced protein 8 like 1 [Source:HGNC Symbol;Acc:HGNC:28279]	0	0	1.06455	1.07932	-inf	-inf	4.58248e-08	1.38698e-05
chr7	-	95404867	95434991	ENST00000455123	nonsense_mediated_decay	9	1515	ENSG00000105854	PON2	GO:0005576(extracellular region);GO:0004064(arylesterase activity);GO:0016020(membrane);GO:0046872(metal ion binding);GO:0016787(hydrolase activity);GO:0005886(plasma membrane);GO:0042802(identical protein binding);GO:0019372(lipoxygenase pathway);GO:0009636(response to toxic substance);GO:0102007(acyl-L-homoserine-lactone lactonohydrolase activity);GO:0019439(aromatic compound catabolic process)…	NA	NA	NA	paraoxonase 2 [Source:HGNC Symbol;Acc:HGNC:9205]	0	0	2.55638	3.38726	-inf	-inf	4.7903e-08	1.41342e-05
chr8	+	97868840	98035978	ENST00000521689	protein_coding	19	3554	ENSG00000132561	MATN2	GO:0005509(calcium ion binding);GO:0005515(protein binding);GO:0005576(extracellular region);GO:0005578(proteinaceous extracellular matrix);GO:0003674(molecular_function);GO:0008150(biological_process);GO:0031012(extracellular matrix);GO:0001764(neuron migration);GO:0007411(axon guidance);GO:0008347(glial cell migration);GO:0031104(dendrite regeneration);GO:0031175(neuron projection development);…	NA	NA	NA	matrilin 2 [Source:HGNC Symbol;Acc:HGNC:6908]	0	0	1.02021	1.41653	-inf	-inf	5.03457e-08	1.46703e-05
chr20	-	62905006	62914406	ENST00000370366	protein_coding	6	2383	ENSG00000101191	DIDO1	GO:0003723(RNA binding);GO:0005634(nucleus);GO:0005737(cytoplasm);GO:0046872(metal ion binding);GO:0006351(transcription, DNA-templated);GO:0005856(cytoskeleton);GO:0006915(apoptotic process);GO:0005819(spindle);GO:0097190(apoptotic signaling pathway)	NA	NA	NA	death inducer-obliterator 1 [Source:HGNC Symbol;Acc:HGNC:2680]	0	0	6.49505	1.47719	-inf	-inf	5.24025e-08	1.50823e-05
chr3	+	43286586	43348753	ENST00000437827	protein_coding	5	1995	ENSG00000163788	SNRK	GO:0005634(nucleus);GO:0046872(metal ion binding);GO:0000166(nucleotide binding);GO:0004672(protein kinase activity);GO:0004674(protein serine/threonine kinase activity);GO:0005524(ATP binding);GO:0006468(protein phosphorylation);GO:0016740(transferase activity);GO:0016301(kinase activity);GO:0016310(phosphorylation);GO:0000287(magnesium ion binding);GO:0005737(cytoplasm);GO:0035556(intracellular…	NA	NA	NA	SNF related kinase [Source:HGNC Symbol;Acc:HGNC:30598]	0	0	2.59209	1.60384	-inf	-inf	5.57298e-08	1.575e-05
chr4	-	185400334	185425969	ENST00000510755	nonsense_mediated_decay	12	1672	ENSG00000109775	UFSP2	GO:0005634(nucleus);GO:0005737(cytoplasm);GO:0016787(hydrolase activity);GO:0005783(endoplasmic reticulum);GO:0008233(peptidase activity);GO:0008234(cysteine-type peptidase activity);GO:0006508(proteolysis);GO:0005515(protein binding);GO:0033146(regulation of intracellular estrogen receptor signaling pathway);GO:0016790(thiolester hydrolase activity);GO:0071567(UFM1 hydrolase activity)	NA	NA	NA	UFM1 specific peptidase 2 [Source:HGNC Symbol;Acc:HGNC:25640]	0	0	1.91428	2.37123	-inf	-inf	5.65182e-08	1.58772e-05
chr2	+	189791810	189873528	ENST00000424059	processed_transcript	9	2004	ENSG00000064933	PMS1	GO:0005634(nucleus);GO:0005524(ATP binding);GO:0003677(DNA binding);GO:0006281(DNA repair);GO:0006974(cellular response to DNA damage stimulus);GO:0030983(mismatched DNA binding);GO:0006298(mismatch repair);GO:0016887(ATPase activity);GO:0003697(single-stranded DNA binding);GO:0032389(MutLalpha complex);GO:0042493(response to drug)	NA	NA	NA	PMS1 homolog 1, mismatch repair system component [Source:HGNC Symbol;Acc:HGNC:9121]	0	0	1.98902	1.63123	-inf	-inf	5.84209e-08	1.59117e-05
chr11	+	76782313	76798153	ENST00000612930	protein_coding	2	2666	ENSG00000182704	TSKU	GO:0005576(extracellular region);GO:0005886(plasma membrane);GO:0007188(adenylate cyclase-modulating G-protein coupled receptor signaling pathway);GO:0004930(G-protein coupled receptor activity);GO:0010468(regulation of gene expression);GO:0021540(corpus callosum morphogenesis);GO:0021670(lateral ventricle development);GO:0021960(anterior commissure morphogenesis);GO:0030178(negative regulation o…	NA	NA	NA	tsukushi, small leucine rich proteoglycan [Source:HGNC Symbol;Acc:HGNC:28850]	0	0	2.03336	1.15259	-inf	-inf	5.86761e-08	1.59117e-05
chr8	+	42271334	42332450	ENST00000342222	nonsense_mediated_decay	22	3952	ENSG00000104365	IKBKB	GO:0005634(nucleus);GO:0005737(cytoplasm);GO:0016020(membrane);GO:0000166(nucleotide binding);GO:0004672(protein kinase activity);GO:0004674(protein serine/threonine kinase activity);GO:0005524(ATP binding);GO:0006468(protein phosphorylation);GO:0005829(cytosol);GO:0016740(transferase activity);GO:0016301(kinase activity);GO:0016310(phosphorylation);GO:0042803(protein homodimerization activity);G…	04014(Ras signaling pathway);04010(MAPK signaling pathway);04064(NF-kappa B signaling pathway);04668(TNF signaling pathway);04068(FoxO signaling pathway);04151(PI3K-Akt signaling pathway);04150(mTOR signaling pathway);04210(Apoptosis);04620(Toll-like receptor signaling pathway);04621(NOD-like receptor signaling pathway);04622(RIG-I-like receptor signaling pathway);04623(Cytosolic DNA-sensing path…	K07209	EC:2.7.11.10	inhibitor of nuclear factor kappa B kinase subunit beta [Source:HGNC Symbol;Acc:HGNC:5960]	0	0	0.854051	1.86124	-inf	-inf	6.1681e-08	1.6455e-05
chr12	-	119688211	119784361	ENST00000537607	processed_transcript	38	4958	ENSG00000122966	CIT	GO:0005737(cytoplasm);GO:0016020(membrane);GO:0046872(metal ion binding);GO:0000166(nucleotide binding);GO:0004672(protein kinase activity);GO:0004674(protein serine/threonine kinase activity);GO:0005524(ATP binding);GO:0006468(protein phosphorylation);GO:0016740(transferase activity);GO:0016301(kinase activity);GO:0016310(phosphorylation);GO:0035556(intracellular signal transduction);GO:0051301(…	NA	NA	NA	citron rho-interacting serine/threonine kinase [Source:HGNC Symbol;Acc:HGNC:1985]	0	0	3.99076	0.601875	-inf	-inf	6.4145e-08	1.6455e-05
chr2	+	178194523	178395772	ENST00000409045	protein_coding	24	3427	ENSG00000079156	OSBPL6	GO:0006810(transport);GO:0005634(nucleus);GO:0005737(cytoplasm);GO:0016020(membrane);GO:0005886(plasma membrane);GO:0005829(cytosol);GO:0005783(endoplasmic reticulum);GO:0005789(endoplasmic reticulum membrane);GO:0005515(protein binding);GO:0006869(lipid transport);GO:0008289(lipid binding);GO:0005635(nuclear envelope);GO:0006699(bile acid biosynthetic process);GO:0031965(nuclear membrane);GO:009…	NA	NA	NA	oxysterol binding protein like 6 [Source:HGNC Symbol;Acc:HGNC:16388]	0	0	0.952259	0.992385	-inf	-inf	6.63659e-08	1.6455e-05
chr16	+	67529727	67546637	ENST00000422602	protein_coding	22	3990	ENSG00000039523	RIPOR1	GO:0005737(cytoplasm);GO:0016020(membrane);GO:0005794(Golgi apparatus);GO:0005515(protein binding);GO:0003674(molecular_function);GO:0008150(biological_process);GO:0070062(extracellular exosome);GO:0009267(cellular response to starvation);GO:0030335(positive regulation of cell migration);GO:0051683(establishment of Golgi localization);GO:0007266(Rho protein signal transduction);GO:0090316(positiv…	NA	NA	NA	RHO family interacting cell polarization regulator 1 [Source:HGNC Symbol;Acc:HGNC:25836]	0	0	0.678595	0.714963	-inf	-inf	6.65973e-08	1.6455e-05
chr3	+	93980142	94055279	ENST00000303097	protein_coding	8	3264	ENSG00000169379	ARL13B	GO:0016020(membrane);GO:0005525(GTP binding);GO:0007264(small GTPase mediated signal transduction);GO:0000166(nucleotide binding);GO:0005622(intracellular);GO:0005886(plasma membrane);GO:0042995(cell projection);GO:0005515(protein binding);GO:0007224(smoothened signaling pathway);GO:0060271(cilium assembly);GO:0005929(cilium);GO:0060170(ciliary membrane);GO:1905515(non-motile cilium assembly);GO:…	NA	NA	NA	ADP ribosylation factor like GTPase 13B [Source:HGNC Symbol;Acc:HGNC:25419]	0	0	0.861438	1.40895	-inf	-inf	6.73193e-08	1.6455e-05
chr17	+	7445531	7457315	ENST00000576360	protein_coding	10	1837	ENSG00000170175	CHRNB1	GO:0006810(transport);GO:0016020(membrane);GO:0016021(integral component of membrane);GO:0005216(ion channel activity);GO:0006811(ion transport);GO:0005886(plasma membrane);GO:0007165(signal transduction);GO:0030054(cell junction);GO:0045202(synapse);GO:0045211(postsynaptic membrane);GO:0005230(extracellular ligand-gated ion channel activity);GO:0060079(excitatory postsynaptic potential);GO:00058…	04080(Neuroactive ligand-receptor interaction)	NA	NA	cholinergic receptor nicotinic beta 1 subunit [Source:HGNC Symbol;Acc:HGNC:1961]	0	0	1.64819	1.70374	-inf	-inf	6.75227e-08	1.6455e-05
chr9	-	137048597	137054018	ENST00000312665	protein_coding	9	1500	ENSG00000054179	ENTPD2	GO:0016020(membrane);GO:0016021(integral component of membrane);GO:0000166(nucleotide binding);GO:0005524(ATP binding);GO:0016787(hydrolase activity);GO:0005783(endoplasmic reticulum);GO:0005789(endoplasmic reticulum membrane);GO:0005886(plasma membrane);GO:0070062(extracellular exosome);GO:0034656(nucleobase-containing small molecule catabolic process);GO:0017111(nucleoside-triphosphatase activi…	00230(Purine metabolism);04742(Taste transduction)	K01509	EC:3.6.1.3	ectonucleoside triphosphate diphosphohydrolase 2 [Source:HGNC Symbol;Acc:HGNC:3364]	0	0	4.28582	1.89074	-inf	-inf	6.99182e-08	1.65664e-05
chr20	-	46367360	46394482	ENST00000352077	protein_coding	20	2157	ENSG00000062598	ELMO2	GO:0005737(cytoplasm);GO:0016020(membrane);GO:0005829(cytosol);GO:0006915(apoptotic process);GO:0016477(cell migration);GO:0038096(Fc-gamma receptor signaling pathway involved in phagocytosis);GO:0007010(cytoskeleton organization);GO:0005515(protein binding);GO:0017124(SH3 domain binding);GO:0098609(cell-cell adhesion);GO:0006909(phagocytosis);GO:0030971(receptor tyrosine kinase binding);GO:00480…	05131(Shigellosis);05100(Bacterial invasion of epithelial cells)	K18985	NA	engulfment and cell motility 2 [Source:HGNC Symbol;Acc:HGNC:17233]	0	0	1.21395	2.51035	-inf	-inf	7.54994e-08	1.75346e-05
chr3	+	159852939	159897349	ENST00000482804	protein_coding	7	1799	ENSG00000151967	SCHIP1	GO:0005737(cytoplasm);GO:0005515(protein binding);GO:0042802(identical protein binding);GO:0008150(biological_process)	NA	NA	NA	schwannomin interacting protein 1 [Source:HGNC Symbol;Acc:HGNC:15678]	0	0	1.57519	3.85672	-inf	-inf	7.6875e-08	1.77026e-05
chr6	-	118813449	118931738	ENST00000619706	protein_coding	12	4822	ENSG00000111877	MCM9	GO:0005634(nucleus);GO:0000166(nucleotide binding);GO:0005524(ATP binding);GO:0016787(hydrolase activity);GO:0003677(DNA binding);GO:0004386(helicase activity);GO:0006270(DNA replication initiation);GO:0006281(DNA repair);GO:0006974(cellular response to DNA damage stimulus);GO:0000724(double-strand break repair via homologous recombination);GO:0007292(female gamete generation);GO:0007276(gamete g…	NA	NA	NA	minichromosome maintenance 9 homologous recombination repair factor [Source:HGNC Symbol;Acc:HGNC:21484]	0	0	3.65001	0.592224	-inf	-inf	7.75353e-08	1.77026e-05
chr11	-	129870093	129894441	ENST00000531755	protein_coding	23	3066	ENSG00000170322	NFRKB	GO:0005634(nucleus);GO:0006351(transcription, DNA-templated);GO:0006355(regulation of transcription, DNA-templated);GO:0003677(DNA binding);GO:0005515(protein binding);GO:0006281(DNA repair);GO:0006310(DNA recombination);GO:0006974(cellular response to DNA damage stimulus);GO:0031011(Ino80 complex);GO:0005654(nucleoplasm);GO:0016579(protein deubiquitination);GO:0006954(inflammatory response);GO:0…	NA	NA	NA	nuclear factor related to kappaB binding protein [Source:HGNC Symbol;Acc:HGNC:7802]	0	0	0.780955	0.911251	-inf	-inf	7.86465e-08	1.77386e-05
chr6	-	31664023	31665190	ENST00000445768	protein_coding	3	822	ENSG00000204438	GPANK1	GO:0003676(nucleic acid binding);GO:0005515(protein binding)	NA	NA	NA	G-patch domain and ankyrin repeats 1 [Source:HGNC Symbol;Acc:HGNC:13920]	0	0	2.90348	4.27242	-inf	-inf	8.16939e-08	1.81639e-05
chrX	+	109535781	109544684	ENST00000218004	protein_coding	5	2692	ENSG00000101888	NXT2	GO:0006810(transport);GO:0051028(mRNA transport);GO:0005634(nucleus);GO:0005737(cytoplasm);GO:0015031(protein transport);GO:0005829(cytosol);GO:0005654(nucleoplasm);GO:0005622(intracellular);GO:0005515(protein binding);GO:0048471(perinuclear region of cytoplasm)	03013(RNA transport);03015(mRNA surveillance pathway);03008(Ribosome biogenesis in eukaryotes);05164(Influenza A)	K14285	NA	nuclear transport factor 2 like export factor 2 [Source:HGNC Symbol;Acc:HGNC:18151]	0	0	2.72583	0.981519	-inf	-inf	8.74051e-08	1.89839e-05
chr11	-	33741442	33753400	ENST00000531080	protein_coding	6	1448	ENSG00000110429	FBXO3	GO:0005829(cytosol);GO:0005654(nucleoplasm);GO:0005634(nucleus);GO:0016567(protein ubiquitination);GO:0005515(protein binding);GO:0004842(ubiquitin-protein transferase activity);GO:0006508(proteolysis)	NA	NA	NA	F-box protein 3 [Source:HGNC Symbol;Acc:HGNC:13582]	0	0	1.49945	2.41497	-inf	-inf	8.79041e-08	1.90043e-05
chr3	+	184361789	184368550	ENST00000438240	protein_coding	5	994	ENSG00000163882	POLR2H	GO:0005634(nucleus);GO:0003677(DNA binding);GO:0006351(transcription, DNA-templated);GO:0005730(nucleolus);GO:0005666(DNA-directed RNA polymerase III complex);GO:0003899(DNA-directed 5'-3' RNA polymerase activity);GO:0005654(nucleoplasm);GO:0005829(cytosol);GO:0006366(transcription from RNA polymerase II promoter);GO:0045815(positive regulation of gene expression, epigenetic);GO:0006368(transcrip…	00230(Purine metabolism);00240(Pyrimidine metabolism);03020(RNA polymerase);04623(Cytosolic DNA-sensing pathway);05016(Huntington's disease);05169(Epstein-Barr virus infection)	K03016	NA	RNA polymerase II subunit H [Source:HGNC Symbol;Acc:HGNC:9195]	0	0	3.81607	2.16355	-inf	-inf	9.21147e-08	1.93117e-05
chr3	+	3126952	3149023	ENST00000280591	protein_coding	8	2180	ENSG00000072756	TRNT1	GO:0003723(RNA binding);GO:0006396(RNA processing);GO:0000166(nucleotide binding);GO:0005524(ATP binding);GO:0016740(transferase activity);GO:0008033(tRNA processing);GO:0005739(mitochondrion);GO:0016779(nucleotidyltransferase activity);GO:0000049(tRNA binding);GO:0005654(nucleoplasm);GO:0005759(mitochondrial matrix);GO:0005622(intracellular);GO:0034062(5'-3' RNA polymerase activity);GO:0052927(C…	03013(RNA transport)	K00974	EC:2.7.7.72 3.1.3.- 3.1.4.-	tRNA nucleotidyl transferase 1 [Source:HGNC Symbol;Acc:HGNC:17341]	0	0	5.1918	1.24233	-inf	-inf	1.01366e-07	2.0395e-05
chr3	-	42548004	42601080	ENST00000417572	protein_coding	7	1513	ENSG00000093183	SEC22C	GO:0016020(membrane);GO:0016021(integral component of membrane);GO:0006810(transport);GO:0015031(protein transport);GO:0005783(endoplasmic reticulum);GO:0005789(endoplasmic reticulum membrane);GO:0005515(protein binding);GO:0016192(vesicle-mediated transport);GO:0000149(SNARE binding);GO:0005484(SNAP receptor activity);GO:0048280(vesicle fusion with Golgi apparatus);GO:0031201(SNARE complex);GO:0…	NA	NA	NA	SEC22 homolog C, vesicle trafficking protein [Source:HGNC Symbol;Acc:HGNC:16828]	0	0	1.57302	4.69492	-inf	-inf	1.03033e-07	2.03952e-05
chr18	-	31829938	31943136	ENST00000580104	nonsense_mediated_decay	30	5014	ENSG00000153339	TRAPPC8	GO:0006810(transport);GO:0005794(Golgi apparatus);GO:0043547(positive regulation of GTPase activity);GO:0005515(protein binding);GO:0016192(vesicle-mediated transport);GO:0005829(cytosol);GO:0017112(Rab guanyl-nucleotide exchange factor activity);GO:0061024(membrane organization);GO:0034497(protein localization to pre-autophagosomal structure);GO:0044804(nucleophagy);GO:0000407(pre-autophagosomal…	NA	NA	NA	trafficking protein particle complex 8 [Source:HGNC Symbol;Acc:HGNC:29169]	0	0	0.622466	0.375226	-inf	-inf	1.1457e-07	2.22356e-05
chr1	+	201622927	201823344	ENST00000367302	protein_coding	30	9685	ENSG00000134369	NAV1	GO:0005737(cytoplasm);GO:0005856(cytoskeleton);GO:0007275(multicellular organism development);GO:0007399(nervous system development);GO:0030154(cell differentiation);GO:0005874(microtubule);GO:0001578(microtubule bundle formation);GO:0001764(neuron migration);GO:0015630(microtubule cytoskeleton);GO:0043194(axon initial segment)	NA	NA	NA	neuron navigator 1 [Source:HGNC Symbol;Acc:HGNC:15989]	0	0	0.225462	0.270122	-inf	-inf	1.147e-07	2.22356e-05
chr6	-	106186540	106316208	ENST00000613993	protein_coding	6	733	ENSG00000057663	ATG5	GO:0005737(cytoplasm);GO:0016020(membrane);GO:0006914(autophagy);GO:0034045(pre-autophagosomal structure membrane);GO:0005515(protein binding);GO:0006915(apoptotic process);GO:0002376(immune system process);GO:0045087(innate immune response);GO:0005829(cytosol);GO:0000045(autophagosome assembly);GO:0075044(autophagy of host cells involved in interaction with symbiont);GO:1902017(regulation of cil…	04140(Autophagy - animal);04136(Autophagy - other eukaryotes);04137(Mitophagy - animal);04216(Ferroptosis);04621(NOD-like receptor signaling pathway);04622(RIG-I-like receptor signaling pathway);04211(Longevity regulating pathway - mammal);04213(Longevity regulating pathway - multiple species);05131(Shigellosis)	NA	NA	autophagy related 5 [Source:HGNC Symbol;Acc:HGNC:589]	0	0	2.86022	6.41431	-inf	-inf	1.20817e-07	2.32296e-05
chr5	+	43122039	43176244	ENST00000509931	protein_coding	3	970	ENSG00000172262	ZNF131	GO:0005634(nucleus);GO:0006357(regulation of transcription from RNA polymerase II promoter);GO:0003700(transcription factor activity, sequence-specific DNA binding);GO:0000981(RNA polymerase II transcription factor activity, sequence-specific DNA binding);GO:0006351(transcription, DNA-templated);GO:0003676(nucleic acid binding);GO:0046872(metal ion binding);GO:0005654(nucleoplasm);GO:0006366(tran…	NA	NA	NA	zinc finger protein 131 [Source:HGNC Symbol;Acc:HGNC:12915]	0	0	4.60284	1.89586	-inf	-inf	1.27371e-07	2.42317e-05
chr14	-	93242038	93294149	ENST00000553975	protein_coding	7	2479	ENSG00000011114	BTBD7	GO:0005634(nucleus);GO:0007275(multicellular organism development)	NA	NA	NA	BTB domain containing 7 [Source:HGNC Symbol;Acc:HGNC:18269]	0	0	0.63518	1.34204	-inf	-inf	1.63726e-07	2.8554e-05
chr9	+	65675834	65734040	ENST00000377392	protein_coding	17	2863	ENSG00000147996	CBWD5	GO:0000166(nucleotide binding);GO:0005524(ATP binding)	NA	NA	NA	COBW domain containing 5 [Source:HGNC Symbol;Acc:HGNC:24584]	0	0	0.842299	0.727405	-inf	-inf	2.40373e-07	3.95679e-05
chr1	-	220057482	220089853	ENST00000544404	protein_coding	8	2379	ENSG00000162813	BPNT1	GO:0046872(metal ion binding);GO:0016787(hydrolase activity);GO:0016311(dephosphorylation);GO:0046854(phosphatidylinositol phosphorylation);GO:0005829(cytosol);GO:0070062(extracellular exosome);GO:0006139(nucleobase-containing compound metabolic process);GO:0007399(nervous system development);GO:0050427(3'-phosphoadenosine 5'-phosphosulfate metabolic process);GO:0008441(3'(2'),5'-bisphosphate nuc…	00920(Sulfur metabolism)	K01082	EC:3.1.3.7	3'(2'), 5'-bisphosphate nucleotidase 1 [Source:HGNC Symbol;Acc:HGNC:1096]	0	0	0.572617	2.54023	-inf	-inf	2.91694e-07	4.59213e-05
chr2	-	24943636	24972094	ENST00000534855	protein_coding	6	4831	ENSG00000115137	DNAJC27	GO:0005634(nucleus);GO:0005525(GTP binding);GO:0000166(nucleotide binding);GO:0003924(GTPase activity);GO:0005515(protein binding);GO:0043410(positive regulation of MAPK cascade);GO:0070374(positive regulation of ERK1 and ERK2 cascade);GO:0071701(regulation of MAPK export from nucleus);GO:0005739(mitochondrion)	NA	NA	NA	DnaJ heat shock protein family (Hsp40) member C27 [Source:HGNC Symbol;Acc:HGNC:30290]	0	0	0.757257	0.23933	-inf	-inf	3.23479e-07	5.02506e-05
chr20	-	37517417	37527732	ENST00000397137	protein_coding	2	2036	ENSG00000166619	BLCAP	GO:0016020(membrane);GO:0016021(integral component of membrane);GO:0005515(protein binding);GO:0007049(cell cycle);GO:0006915(apoptotic process);GO:0030262(apoptotic nuclear changes)	NA	NA	NA	bladder cancer associated protein [Source:HGNC Symbol;Acc:HGNC:1055]	0	0	7.12244	0.724347	-inf	-inf	3.61674e-07	5.56315e-05
chr3	-	155479882	155676039	ENST00000340059	protein_coding	23	6168	ENSG00000114805	PLCH1	GO:0005737(cytoplasm);GO:0016020(membrane);GO:0043231(intracellular membrane-bounded organelle);GO:0046872(metal ion binding);GO:0016787(hydrolase activity);GO:0035556(intracellular signal transduction);GO:0005509(calcium ion binding);GO:0007165(signal transduction);GO:0006629(lipid metabolic process);GO:0016042(lipid catabolic process);GO:0004871(signal transducer activity);GO:0008081(phosphoric…	00562(Inositol phosphate metabolism)	K19006	EC:3.1.4.11	phospholipase C eta 1 [Source:HGNC Symbol;Acc:HGNC:29185]	0	0	1.06375	0.172839	-inf	-inf	4.81565e-07	7.21794e-05
chr11	+	57657760	57661436	ENST00000525602	protein_coding	3	1392	ENSG00000172409	CLP1	GO:0006397(mRNA processing);GO:0005634(nucleus);GO:0000166(nucleotide binding);GO:0005524(ATP binding);GO:0005829(cytosol);GO:0005654(nucleoplasm);GO:0016740(transferase activity);GO:0008033(tRNA processing);GO:0016301(kinase activity);GO:0016310(phosphorylation);GO:0000214(tRNA-intron endonuclease complex);GO:0005849(mRNA cleavage factor complex);GO:0031124(mRNA 3'-end processing);GO:0046404(ATP…	03015(mRNA surveillance pathway)	NA	NA	cleavage and polyadenylation factor I subunit 1 [Source:HGNC Symbol;Acc:HGNC:16999]	0	0	0.682212	3.42179	-inf	-inf	4.90053e-07	7.29852e-05
chr20	-	47657668	47786554	ENST00000467815	protein_coding	21	3905	ENSG00000196562	SULF2	GO:0040037(negative regulation of fibroblast growth factor receptor signaling pathway);GO:0046872(metal ion binding);GO:0016787(hydrolase activity);GO:0005509(calcium ion binding);GO:0003824(catalytic activity);GO:0005794(Golgi apparatus);GO:0008152(metabolic process);GO:0005783(endoplasmic reticulum);GO:0005886(plasma membrane);GO:0005615(extracellular space);GO:0008484(sulfuric ester hydrolase …	NA	NA	NA	sulfatase 2 [Source:HGNC Symbol;Acc:HGNC:20392]	0	0	0.320666	3.46627	-inf	-inf	5.21686e-07	7.74506e-05
chr6	+	30326920	30343729	ENST00000396548	protein_coding	9	3198	ENSG00000204599	TRIM39	GO:0008270(zinc ion binding);GO:0046872(metal ion binding);GO:0005829(cytosol);GO:0005622(intracellular);GO:0005737(cytoplasm);GO:0016740(transferase activity);GO:0016567(protein ubiquitination);GO:0005739(mitochondrion);GO:0005515(protein binding);GO:0006915(apoptotic process);GO:0042802(identical protein binding);GO:2000059(negative regulation of protein ubiquitination involved in ubiquitin-dep…	NA	NA	NA	tripartite motif containing 39 [Source:HGNC Symbol;Acc:HGNC:10065]	0	0	2.35457	0.345493	-inf	-inf	5.29921e-07	7.8425e-05
chr6	-	10398013	10416190	ENST00000482890	protein_coding	8	2071	ENSG00000137203	TFAP2A	GO:0005634(nucleus);GO:0006355(regulation of transcription, DNA-templated);GO:0003700(transcription factor activity, sequence-specific DNA binding);GO:0005794(Golgi apparatus);GO:0043231(intracellular membrane-bounded organelle);GO:0005829(cytosol);GO:0005654(nucleoplasm);GO:0005813(centrosome);GO:0006366(transcription from RNA polymerase II promoter);GO:0006351(transcription, DNA-templated);GO:0…	NA	NA	NA	transcription factor AP-2 alpha [Source:HGNC Symbol;Acc:HGNC:11742]	0	0	5.01036	0.546054	-inf	-inf	6.11613e-07	8.91093e-05
chr1	-	155195588	155207897	ENST00000368378	protein_coding	23	3145	ENSG00000169231	THBS3	GO:0005509(calcium ion binding);GO:0007155(cell adhesion);GO:0005576(extracellular region);GO:0048471(perinuclear region of cytoplasm);GO:0008201(heparin binding);GO:0007160(cell-matrix adhesion);GO:0003417(growth plate cartilage development);GO:0043931(ossification involved in bone maturation);GO:0060346(bone trabecula formation)	04151(PI3K-Akt signaling pathway);04512(ECM-receptor interaction);04145(Phagosome);04510(Focal adhesion);05165(Human papillomavirus infection);05144(Malaria)	K04659	NA	thrombospondin 3 [Source:HGNC Symbol;Acc:HGNC:11787]	0	0	2.25183	0.306149	-inf	-inf	6.3462e-07	9.18907e-05
chr8	-	18056571	18084096	ENST00000636577	protein_coding	14	2129	ENSG00000104763	ASAH1	GO:0016787(hydrolase activity);GO:0006629(lipid metabolic process);GO:0005764(lysosome);GO:0005615(extracellular space);GO:0005576(extracellular region);GO:0006687(glycosphingolipid metabolic process);GO:0070062(extracellular exosome);GO:0043312(neutrophil degranulation);GO:1904813(ficolin-1-rich granule lumen);GO:1904724(tertiary granule lumen);GO:0043202(lysosomal lumen);GO:0003824(catalytic ac…	00600(Sphingolipid metabolism);04071(Sphingolipid signaling pathway);04142(Lysosome)	NA	NA	N-acylsphingosine amidohydrolase 1 [Source:HGNC Symbol;Acc:HGNC:735]	0	0	0.509147	4.48582	-inf	-inf	6.64017e-07	9.55573e-05
chr1	-	108931986	108950448	ENST00000369970	protein_coding	11	2078	ENSG00000121940	CLCC1	GO:0006810(transport);GO:0005634(nucleus);GO:0016020(membrane);GO:0016021(integral component of membrane);GO:0043231(intracellular membrane-bounded organelle);GO:0005783(endoplasmic reticulum);GO:0005794(Golgi apparatus);GO:0006811(ion transport);GO:0005254(chloride channel activity);GO:0006821(chloride transport);GO:0034707(chloride channel complex);GO:1902476(chloride transmembrane transport)	NA	NA	NA	chloride channel CLIC like 1 [Source:HGNC Symbol;Acc:HGNC:29675]	0	0	0.506511	5.89277	-inf	-inf	7.06136e-07	0.000100999
chr19	+	49877702	49883002	ENST00000594996	nonsense_mediated_decay	10	1161	ENSG00000104946	TBC1D17	GO:0006810(transport);GO:0015031(protein transport);GO:0005829(cytosol);GO:0005515(protein binding);GO:0006914(autophagy);GO:0031410(cytoplasmic vesicle);GO:0005096(GTPase activator activity);GO:0017137(Rab GTPase binding);GO:0006886(intracellular protein transport);GO:0031338(regulation of vesicle fusion);GO:0090630(activation of GTPase activity);GO:0012505(endomembrane system);GO:0061024(membra…	04137(Mitophagy - animal)	NA	NA	TBC1 domain family member 17 [Source:HGNC Symbol;Acc:HGNC:25699]	0	0	2.41063	1.3572	-inf	-inf	7.30559e-07	0.000103545
chr18	+	23992773	24133027	ENST00000304621	protein_coding	14	2304	ENSG00000168234	TTC39C	NA	NA	NA	NA	tetratricopeptide repeat domain 39C [Source:HGNC Symbol;Acc:HGNC:26595]	0	0	1.07376	0.756507	-inf	-inf	9.84637e-07	0.000134674
chr17	-	74842023	74859875	ENST00000293190	protein_coding	13	4261	ENSG00000161509	GRIN2C	GO:0005622(intracellular);GO:0006810(transport);GO:0016020(membrane);GO:0016021(integral component of membrane);GO:0005216(ion channel activity);GO:0006811(ion transport);GO:0034220(ion transmembrane transport);GO:0098655(cation transmembrane transport);GO:0005886(plasma membrane);GO:0043547(positive regulation of GTPase activity);GO:0005515(protein binding);GO:0030054(cell junction);GO:0045202(s…	04020(Calcium signaling pathway);04024(cAMP signaling pathway);04080(Neuroactive ligand-receptor interaction);04724(Glutamatergic synapse);04720(Long-term potentiation);04713(Circadian entrainment);05010(Alzheimer's disease);05014(Amyotrophic lateral sclerosis (ALS));05030(Cocaine addiction);05031(Amphetamine addiction);05033(Nicotine addiction);05034(Alcoholism)	K05211	NA	glutamate ionotropic receptor NMDA type subunit 2C [Source:HGNC Symbol;Acc:HGNC:4587]	0	0	0.417142	0.559335	-inf	-inf	1.02118e-06	0.000138461
chr21	-	33578201	33588634	ENST00000437395	protein_coding	9	1719	ENSG00000159147	DONSON	GO:0005634(nucleus);GO:0007275(multicellular organism development);GO:0003674(molecular_function);GO:0008150(biological_process);GO:0005575(cellular_component);GO:0033260(nuclear DNA replication)	NA	NA	NA	downstream neighbor of SON [Source:HGNC Symbol;Acc:HGNC:2993]	0	0	1.28709	0.945411	-inf	-inf	1.39428e-06	0.000181195
chr1	-	121167720	121183911	ENST00000355228	protein_coding	4	1773	ENSG00000188610	FAM72B	GO:0043231(intracellular membrane-bounded organelle);GO:0005829(cytosol)	NA	NA	NA	family with sequence similarity 72 member B [Source:HGNC Symbol;Acc:HGNC:24805]	0	0	0.916598	1.19657	-inf	-inf	1.51055e-06	0.000194687
chr15	-	52581321	52678623	ENST00000261844	protein_coding	13	4217	ENSG00000047346	FAM214A	GO:0005515(protein binding)	NA	NA	NA	family with sequence similarity 214 member A [Source:HGNC Symbol;Acc:HGNC:25609]	0	0	0.203658	0.837367	-inf	-inf	1.72285e-06	0.00021904
chr3	-	132558472	132660066	ENST00000485198	nonsense_mediated_decay	18	2940	ENSG00000240303	ACAD11	GO:0005634(nucleus);GO:0016491(oxidoreductase activity);GO:0050660(flavin adenine dinucleotide binding);GO:0055114(oxidation-reduction process);GO:0016627(oxidoreductase activity, acting on the CH-CH group of donors);GO:0008152(metabolic process);GO:0005739(mitochondrion);GO:0005777(peroxisome);GO:0031966(mitochondrial membrane);GO:0005743(mitochondrial inner membrane);GO:0006635(fatty acid beta-…	NA	NA	NA	acyl-CoA dehydrogenase family member 11 [Source:HGNC Symbol;Acc:HGNC:30211]	0	0	0.447232	0.831824	-inf	-inf	1.84172e-06	0.000232327
chr17	-	37687242	37745018	ENST00000614313	protein_coding	8	1819	ENSG00000275410	HNF1B	GO:0005634(nucleus);GO:0005654(nucleoplasm);GO:0045893(positive regulation of transcription, DNA-templated);GO:0006351(transcription, DNA-templated);GO:0006355(regulation of transcription, DNA-templated);GO:0003677(DNA binding);GO:0003700(transcription factor activity, sequence-specific DNA binding);GO:0005515(protein binding);GO:0000977(RNA polymerase II regulatory region sequence-specific DNA b…	04950(Maturity onset diabetes of the young)	K08034	NA	HNF1 homeobox B [Source:HGNC Symbol;Acc:HGNC:11630]	0	0	1.09336	0.872872	-inf	-inf	1.88411e-06	0.000236319
chr2	+	189784085	189877628	ENST00000418224	protein_coding	11	3018	ENSG00000064933	PMS1	GO:0005634(nucleus);GO:0005524(ATP binding);GO:0003677(DNA binding);GO:0006281(DNA repair);GO:0006974(cellular response to DNA damage stimulus);GO:0030983(mismatched DNA binding);GO:0006298(mismatch repair);GO:0016887(ATPase activity);GO:0003697(single-stranded DNA binding);GO:0032389(MutLalpha complex);GO:0042493(response to drug)	NA	NA	NA	PMS1 homolog 1, mismatch repair system component [Source:HGNC Symbol;Acc:HGNC:9121]	0	0	0.5462	0.640196	-inf	-inf	1.88898e-06	0.000236319
chr3	-	16315845	16482865	ENST00000432519	protein_coding	9	2695	ENSG00000131378	RFTN1	GO:0016020(membrane);GO:0005886(plasma membrane);GO:0045121(membrane raft);GO:0070062(extracellular exosome);GO:0043234(protein complex);GO:0005737(cytoplasm);GO:0050852(T cell receptor signaling pathway);GO:0050853(B cell receptor signaling pathway);GO:0043330(response to exogenous dsRNA);GO:0003725(double-stranded RNA binding);GO:0005768(endosome);GO:0001765(membrane raft assembly);GO:1903044(p…	NA	NA	NA	raftlin, lipid raft linker 1 [Source:HGNC Symbol;Acc:HGNC:30278]	0	0	0.887061	0.46327	-inf	-inf	2.2366e-06	0.000271834
chr1	-	113894748	113904828	ENST00000369567	protein_coding	7	2144	ENSG00000134262	AP4B1	GO:0006810(transport);GO:0016020(membrane);GO:0008565(protein transporter activity);GO:0006886(intracellular protein transport);GO:0015031(protein transport);GO:0016192(vesicle-mediated transport);GO:0030117(membrane coat);GO:0030131(clathrin adaptor complex);GO:0005794(Golgi apparatus);GO:0005515(protein binding);GO:0005905(clathrin-coated pit);GO:0005215(transporter activity);GO:0031904(endosom…	04142(Lysosome)	K12401	NA	adaptor related protein complex 4 beta 1 subunit [Source:HGNC Symbol;Acc:HGNC:572]	0	0	1.18559	0.532619	-inf	-inf	2.3926e-06	0.000286344
chr14	+	30628209	30653588	ENST00000554776	nonsense_mediated_decay	7	583	ENSG00000092108	SCFD1	GO:0006810(transport);GO:0005737(cytoplasm);GO:0016020(membrane);GO:0015031(protein transport);GO:0016192(vesicle-mediated transport);GO:0005794(Golgi apparatus);GO:0005783(endoplasmic reticulum);GO:0005789(endoplasmic reticulum membrane);GO:0005886(plasma membrane);GO:0005515(protein binding);GO:0006904(vesicle docking involved in exocytosis);GO:0032580(Golgi cisterna membrane);GO:0005829(cytoso…	NA	NA	NA	sec1 family domain containing 1 [Source:HGNC Symbol;Acc:HGNC:20726]	0	0	1.51675	5.78002	-inf	-inf	2.60255e-06	0.000309104
chr15	-	34233259	34336844	ENST00000397707	protein_coding	24	4194	ENSG00000140199	SLC12A6	GO:0006810(transport);GO:0016020(membrane);GO:0016021(integral component of membrane);GO:0005215(transporter activity);GO:0055085(transmembrane transport);GO:0006811(ion transport);GO:0005887(integral component of plasma membrane);GO:0015293(symporter activity);GO:0006813(potassium ion transport);GO:0005886(plasma membrane);GO:0071805(potassium ion transmembrane transport);GO:0015377(cation:chlor…	NA	NA	NA	solute carrier family 12 member 6 [Source:HGNC Symbol;Acc:HGNC:10914]	0	0	0.48221	0.320319	-inf	-inf	2.81388e-06	0.000330501
chr19	-	58517623	58519559	ENST00000596739	protein_coding	2	592	ENSG00000119574	ZBTB45	GO:0003676(nucleic acid binding);GO:0005634(nucleus);GO:0046872(metal ion binding);GO:0006351(transcription, DNA-templated);GO:0006355(regulation of transcription, DNA-templated);GO:0003677(DNA binding);GO:0007399(nervous system development)	NA	NA	NA	zinc finger and BTB domain containing 45 [Source:HGNC Symbol;Acc:HGNC:23715]	0	0	1.97859	3.70276	-inf	-inf	3.19124e-06	0.000367847
chr10	-	13646334	13657123	ENST00000495956	protein_coding	3	1287	ENSG00000151474	FRMD4A	GO:0005737(cytoplasm);GO:0005856(cytoskeleton);GO:0030674(protein binding, bridging);GO:0090162(establishment of epithelial cell polarity);GO:0005923(bicellular tight junction)	NA	NA	NA	FERM domain containing 4A [Source:HGNC Symbol;Acc:HGNC:25491]	0	0	1.46459	1.06544	-inf	-inf	3.24024e-06	0.000371668
chr10	-	114294824	114404756	ENST00000369271	protein_coding	19	3964	ENSG00000169129	AFAP1L2	GO:0005737(cytoplasm);GO:0005829(cytosol);GO:0035591(signaling adaptor activity);GO:0005886(plasma membrane);GO:0009966(regulation of signal transduction);GO:0061098(positive regulation of protein tyrosine kinase activity);GO:0007346(regulation of mitotic cell cycle);GO:0045893(positive regulation of transcription, DNA-templated);GO:0006954(inflammatory response);GO:0017124(SH3 domain binding);GO…	NA	NA	NA	actin filament associated protein 1 like 2 [Source:HGNC Symbol;Acc:HGNC:25901]	0	0	0.287945	0.543602	-inf	-inf	3.65491e-06	0.00041618
chr1	+	236835616	236900418	ENST00000366576	protein_coding	20	5234	ENSG00000116984	MTR	GO:0005737(cytoplasm);GO:0008270(zinc ion binding);GO:0046872(metal ion binding);GO:0005829(cytosol);GO:0008168(methyltransferase activity);GO:0016740(transferase activity);GO:0032259(methylation);GO:0005515(protein binding);GO:0008652(cellular amino acid biosynthetic process);GO:0044237(cellular metabolic process);GO:0009086(methionine biosynthetic process);GO:0031419(cobalamin binding);GO:00087…	00270(Cysteine and methionine metabolism);00450(Selenocompound metabolism);00670(One carbon pool by folate)	K00548	EC:2.1.1.13	5-methyltetrahydrofolate-homocysteine methyltransferase [Source:HGNC Symbol;Acc:HGNC:7468]	0	0	0.293631	0.288304	-inf	-inf	4.31426e-06	0.000486536
chr6	-	118910597	118935114	ENST00000316068	protein_coding	7	2442	ENSG00000111877	MCM9	GO:0005634(nucleus);GO:0000166(nucleotide binding);GO:0005524(ATP binding);GO:0016787(hydrolase activity);GO:0003677(DNA binding);GO:0004386(helicase activity);GO:0006270(DNA replication initiation);GO:0006281(DNA repair);GO:0006974(cellular response to DNA damage stimulus);GO:0000724(double-strand break repair via homologous recombination);GO:0007292(female gamete generation);GO:0007276(gamete g…	NA	NA	NA	minichromosome maintenance 9 homologous recombination repair factor [Source:HGNC Symbol;Acc:HGNC:21484]	0	0	0.632483	0.552741	-inf	-inf	5.30027e-06	0.000583701
chr6	+	30328907	30346854	ENST00000623385	protein_coding	11	1698	ENSG00000248167	TRIM39-RPP21	GO:0008270(zinc ion binding);GO:0046872(metal ion binding);GO:0005829(cytosol);GO:0005622(intracellular)	NA	NA	NA	TRIM39-RPP21 readthrough [Source:HGNC Symbol;Acc:HGNC:38845]	0	0	0.76436	0.943995	-inf	-inf	5.35262e-06	0.000586712
chr12	-	105173935	105233450	ENST00000539978	protein_coding	21	2680	ENSG00000136044	APPL2	GO:0005634(nucleus);GO:0005737(cytoplasm);GO:0016020(membrane);GO:0005515(protein binding);GO:0007165(signal transduction);GO:0007049(cell cycle);GO:0005768(endosome);GO:0070062(extracellular exosome);GO:0008283(cell proliferation);GO:0010008(endosome membrane);GO:0031901(early endosome membrane);GO:0016581(NuRD complex)	NA	NA	NA	adaptor protein, phosphotyrosine interacting with PH domain and leucine zipper 2 [Source:HGNC Symbol;Acc:HGNC:18242]	0	0	0.621325	0.452547	-inf	-inf	5.75048e-06	0.000624487
chr5	+	72956069	73088428	ENST00000512348	protein_coding	25	2700	ENSG00000157107	FCHO2	GO:0016020(membrane);GO:0005886(plasma membrane);GO:0005515(protein binding);GO:0005905(clathrin-coated pit);GO:0035091(phosphatidylinositol binding);GO:0072583(clathrin-dependent endocytosis);GO:0005829(cytosol);GO:0006897(endocytosis);GO:0061024(membrane organization);GO:0005546(phosphatidylinositol-4,5-bisphosphate binding);GO:0048268(clathrin coat assembly);GO:0030136(clathrin-coated vesicle)…	NA	NA	NA	FCH domain only 2 [Source:HGNC Symbol;Acc:HGNC:25180]	0	0	0.731109	0.370908	-inf	-inf	6.21875e-06	0.00066457
chr17	-	58520359	58540818	ENST00000412945	protein_coding	12	1597	ENSG00000108387	SEPT4	GO:0005634(nucleus);GO:0005737(cytoplasm);GO:0005525(GTP binding);GO:0000166(nucleotide binding);GO:0005654(nucleoplasm);GO:0051301(cell division);GO:0005739(mitochondrion);GO:0005856(cytoskeleton);GO:0042995(cell projection);GO:0005515(protein binding);GO:0007049(cell cycle);GO:0006915(apoptotic process);GO:0030154(cell differentiation);GO:0007283(spermatogenesis);GO:0043065(positive regulation …	04210(Apoptosis);04215(Apoptosis - multiple species)	K16943	NA	septin 4 [Source:HGNC Symbol;Acc:HGNC:9165]	0	0	0.849389	0.893384	-inf	-inf	6.31557e-06	0.000673383
chr11	+	10305088	10306530	ENST00000526492	protein_coding	4	641	ENSG00000148926	ADM	GO:0005615(extracellular space);GO:0005737(cytoplasm);GO:0005576(extracellular region);GO:0005179(hormone activity);GO:0006171(cAMP biosynthetic process);GO:0005515(protein binding);GO:0007165(signal transduction);GO:0007267(cell-cell signaling);GO:0005102(receptor binding);GO:0009611(response to wounding);GO:0030816(positive regulation of cAMP metabolic process);GO:0030819(positive regulation of…	04270(Vascular smooth muscle contraction)	NA	NA	adrenomedullin [Source:HGNC Symbol;Acc:HGNC:259]	0	0	2.60228	1.74189	-inf	-inf	6.89024e-06	0.000728038
chr11	+	118481831	118491895	ENST00000392873	protein_coding	8	1098	ENSG00000118058	KMT2A	GO:0045944(positive regulation of transcription from RNA polymerase II promoter);GO:0005634(nucleus);GO:0008270(zinc ion binding);GO:0046872(metal ion binding);GO:0005829(cytosol);GO:0005654(nucleoplasm);GO:0008168(methyltransferase activity);GO:0016740(transferase activity);GO:0032259(methylation);GO:0006355(regulation of transcription, DNA-templated);GO:0006351(transcription, DNA-templated);GO:…	00310(Lysine degradation);05202(Transcriptional misregulation in cancers)	NA	NA	lysine methyltransferase 2A [Source:HGNC Symbol;Acc:HGNC:7132]	0	0	1.57865	0.965898	-inf	-inf	7.17056e-06	0.000750892
chr5	+	65563296	65587422	ENST00000510930	nonsense_mediated_decay	12	2019	ENSG00000113593	PPWD1	GO:0006397(mRNA processing);GO:0008380(RNA splicing);GO:0005634(nucleus);GO:0016853(isomerase activity);GO:0003755(peptidyl-prolyl cis-trans isomerase activity);GO:0000413(protein peptidyl-prolyl isomerization);GO:0006457(protein folding);GO:0005681(spliceosomal complex);GO:0016604(nuclear body);GO:0005654(nucleoplasm);GO:0000398(mRNA splicing, via spliceosome);GO:0071013(catalytic step 2 spliceo…	NA	NA	NA	peptidylprolyl isomerase domain and WD repeat containing 1 [Source:HGNC Symbol;Acc:HGNC:28954]	0	0	0.834794	0.528019	-inf	-inf	7.64249e-06	0.000789735
chr11	+	313527	315240	ENST00000328221	protein_coding	3	844	ENSG00000185885	IFITM1	GO:0016020(membrane);GO:0016021(integral component of membrane);GO:0005886(plasma membrane);GO:0002376(immune system process);GO:0045087(innate immune response);GO:0050776(regulation of immune response);GO:0009607(response to biotic stimulus);GO:0051607(defense response to virus);GO:0005515(protein binding);GO:0008285(negative regulation of cell proliferation);GO:0009615(response to virus);GO:004…	04662(B cell receptor signaling pathway)	NA	NA	interferon induced transmembrane protein 1 [Source:HGNC Symbol;Acc:HGNC:5412]	0	0	1.5267	1.55821	-inf	-inf	8.28052e-06	0.000850049
chr12	+	56080205	56102834	ENST00000551242	nonsense_mediated_decay	11	2755	ENSG00000065361	ERBB3	GO:0005615(extracellular space);GO:0005622(intracellular);GO:0014068(positive regulation of phosphatidylinositol 3-kinase signaling);GO:0016020(membrane);GO:0016021(integral component of membrane);GO:0000166(nucleotide binding);GO:0004672(protein kinase activity);GO:0005524(ATP binding);GO:0006468(protein phosphorylation);GO:0016740(transferase activity);GO:0016301(kinase activity);GO:0016310(pho…	04012(ErbB signaling pathway);04020(Calcium signaling pathway);05206(MicroRNAs in cancer);05205(Proteoglycans in cancer);01521(EGFR tyrosine kinase inhibitor resistance)	NA	NA	erb-b2 receptor tyrosine kinase 3 [Source:HGNC Symbol;Acc:HGNC:3431]	0	0	0.705994	0.315552	-inf	-inf	8.41582e-06	0.000860173
chr2	+	178123863	178139011	ENST00000455903	protein_coding	4	2964	ENSG00000155636	RBM45	GO:0003676(nucleic acid binding);GO:0003723(RNA binding);GO:0005634(nucleus);GO:0005737(cytoplasm);GO:0005515(protein binding);GO:0007275(multicellular organism development);GO:0007399(nervous system development);GO:0030154(cell differentiation)	NA	NA	NA	RNA binding motif protein 45 [Source:HGNC Symbol;Acc:HGNC:24468]	0	0	0.285884	0.629753	-inf	-inf	1.01457e-05	0.0010214
chr15	+	82262811	82284930	ENST00000339465	protein_coding	3	3134	ENSG00000188659	SAXO2	GO:0008017(microtubule binding)	NA	NA	NA	stabilizer of axonemal microtubules 2 [Source:HGNC Symbol;Acc:HGNC:33727]	0	0	0.301069	0.496241	-inf	-inf	1.08253e-05	0.00108285
chr14	+	64924036	65015683	ENST00000551823	nonsense_mediated_decay	6	517	ENSG00000125954	CHURC1-FNTB	GO:0008270(zinc ion binding);GO:0045893(positive regulation of transcription, DNA-templated);GO:0007275(multicellular organism development);GO:0016740(transferase activity);GO:0003824(catalytic activity);GO:0042127(regulation of cell proliferation);GO:0004660(protein farnesyltransferase activity);GO:0018343(protein farnesylation);GO:0005965(protein farnesyltransferase complex)	NA	NA	NA	CHURC1-FNTB readthrough [Source:HGNC Symbol;Acc:HGNC:42960]	0	0	1.6416	3.3717	-inf	-inf	1.08903e-05	0.00108473
chr11	+	83194249	83215200	ENST00000526731	protein_coding	6	3230	ENSG00000137494	ANKRD42	GO:0005622(intracellular);GO:0003735(structural constituent of ribosome);GO:0006412(translation);GO:0005840(ribosome)	NA	NA	NA	ankyrin repeat domain 42 [Source:HGNC Symbol;Acc:HGNC:26752]	0	0	0.378558	0.355454	-inf	-inf	1.14845e-05	0.00114149
chr12	+	96907257	96936759	ENST00000557454	processed_transcript	4	564	ENSG00000139350	NEDD1	GO:0005737(cytoplasm);GO:0051301(cell division);GO:0005856(cytoskeleton);GO:0007049(cell cycle);GO:0005813(centrosome);GO:0005815(microtubule organizing center);GO:0005515(protein binding);GO:0005829(cytosol);GO:0000086(G2/M transition of mitotic cell cycle);GO:0010389(regulation of G2/M transition of mitotic cell cycle);GO:0097711(ciliary basal body docking);GO:0036064(ciliary basal body);GO:000…	NA	NA	NA	neural precursor cell expressed, developmentally down-regulated 1 [Source:HGNC Symbol;Acc:HGNC:7723]	0	0	1.51276	2.76579	-inf	-inf	1.28862e-05	0.00126807
chr7	+	139359908	139374555	ENST00000435096	retained_intron	2	570	ENSG00000146963	LUC7L2	GO:0003723(RNA binding);GO:0003729(mRNA binding);GO:0005634(nucleus);GO:0016607(nuclear speck);GO:0005515(protein binding);GO:0005654(nucleoplasm);GO:0005685(U1 snRNP);GO:0006376(mRNA splice site selection);GO:0019899(enzyme binding);GO:0071004(U2-type prespliceosome)	NA	NA	NA	LUC7 like 2, pre-mRNA splicing factor [Source:HGNC Symbol;Acc:HGNC:21608]	0	0	1.83215	2.20895	-inf	-inf	1.3091e-05	0.00128483
chr1	-	2374853	2388337	ENST00000449373	protein_coding	5	4764	ENSG00000116151	MORN1	NA	NA	NA	NA	MORN repeat containing 1 [Source:HGNC Symbol;Acc:HGNC:25852]	0	0	0.226889	0.24277	-inf	-inf	1.44596e-05	0.00141325
chr15	-	50278402	50355124	ENST00000543881	protein_coding	8	1450	ENSG00000104064	GABPB1	GO:0005634(nucleus);GO:0005654(nucleoplasm);GO:0006351(transcription, DNA-templated);GO:0006355(regulation of transcription, DNA-templated);GO:0005515(protein binding);GO:0000932(P-body);GO:0003700(transcription factor activity, sequence-specific DNA binding);GO:0045944(positive regulation of transcription from RNA polymerase II promoter);GO:0007005(mitochondrion organization);GO:0006357(regulati…	NA	NA	NA	GA binding protein transcription factor beta subunit 1 [Source:HGNC Symbol;Acc:HGNC:4074]	0	0	1.02722	0.573633	-inf	-inf	1.47117e-05	0.00143192
chr1	+	207768118	207794780	ENST00000636114	processed_transcript	6	2098	ENSG00000117335	CD46	GO:0016020(membrane);GO:0016021(integral component of membrane);GO:0005886(plasma membrane);GO:0005515(protein binding);GO:0043086(negative regulation of catalytic activity);GO:0031410(cytoplasmic vesicle);GO:0009986(cell surface);GO:0002376(immune system process);GO:0045087(innate immune response);GO:0005925(focal adhesion);GO:0002250(adaptive immune response);GO:0030449(regulation of complement…	04610(Complement and coagulation cascades);05162(Measles)	NA	NA	CD46 molecule [Source:HGNC Symbol;Acc:HGNC:6953]	0	0	0.621105	0.447045	-inf	-inf	1.49914e-05	0.00145311
chr11	+	34915829	34960511	ENST00000533550	protein_coding	5	584	ENSG00000110435	PDHX	GO:0016746(transferase activity, transferring acyl groups);GO:0008152(metabolic process);GO:0005739(mitochondrion);GO:0005515(protein binding);GO:0005759(mitochondrial matrix);GO:0034641(cellular nitrogen compound metabolic process);GO:0034604(pyruvate dehydrogenase (NAD+) activity);GO:0006090(pyruvate metabolic process);GO:0010510(regulation of acetyl-CoA biosynthetic process from pyruvate);GO:0…	00010(Glycolysis / Gluconeogenesis);00020(Citrate cycle (TCA cycle));00620(Pyruvate metabolism)	NA	NA	pyruvate dehydrogenase complex component X [Source:HGNC Symbol;Acc:HGNC:21350]	0	0	1.41977	2.26033	-inf	-inf	1.72131e-05	0.0016281
chr12	+	8082268	8097769	ENST00000450991	nonsense_mediated_decay	7	2446	ENSG00000089818	NECAP1	GO:0006810(transport);GO:0016020(membrane);GO:0015031(protein transport);GO:0006897(endocytosis);GO:0005886(plasma membrane);GO:0031410(cytoplasmic vesicle);GO:0005829(cytosol);GO:0061024(membrane organization);GO:0030665(clathrin-coated vesicle membrane);GO:0005905(clathrin-coated pit);GO:0030125(clathrin vesicle coat)	NA	NA	NA	NECAP endocytosis associated 1 [Source:HGNC Symbol;Acc:HGNC:24539]	0	0	0.332484	0.53583	-inf	-inf	1.82599e-05	0.00170307
chr2	+	120240064	120289705	ENST00000447591	protein_coding	4	558	ENSG00000144118	RALB	GO:0005622(intracellular);GO:0005525(GTP binding);GO:0016020(membrane);GO:0000166(nucleotide binding);GO:0007165(signal transduction);GO:0003924(GTPase activity);GO:0005886(plasma membrane);GO:0007265(Ras protein signal transduction);GO:0051301(cell division);GO:0007049(cell cycle);GO:0006915(apoptotic process);GO:0030496(midbody);GO:0005515(protein binding);GO:0000145(exocyst);GO:0070062(extrace…	04014(Ras signaling pathway);04015(Rap1 signaling pathway);04072(Phospholipase D signaling pathway);05200(Pathways in cancer);05210(Colorectal cancer);05212(Pancreatic cancer)	NA	NA	RAS like proto-oncogene B [Source:HGNC Symbol;Acc:HGNC:9840]	0	0	1.53635	2.02235	-inf	-inf	2.00182e-05	0.00184144
chr16	-	30697713	30699058	ENST00000568500	antisense_RNA	2	1142	ENSG00000261840	AC093249.6	NA	NA	NA	NA	NA	0	0	0.887888	0.821349	-inf	-inf	2.05049e-05	0.00187518
chr10	+	49942081	49973679	ENST00000451577	protein_coding	5	1152	ENSG00000204152	TIMM23B	GO:0003674(molecular_function);GO:0008150(biological_process);GO:0005575(cellular_component);GO:0006810(transport);GO:0016020(membrane);GO:0016021(integral component of membrane);GO:0006886(intracellular protein transport);GO:0015031(protein transport);GO:0015450(P-P-bond-hydrolysis-driven protein transmembrane transporter activity);GO:0005743(mitochondrial inner membrane);GO:0005739(mitochondrio…	NA	NA	NA	translocase of inner mitochondrial membrane 23 homolog B [Source:HGNC Symbol;Acc:HGNC:23581]	0	0	0.808021	0.843429	-inf	-inf	2.1625e-05	0.00196612
chr3	-	4361795	4467269	ENST00000458465	protein_coding	5	1102	ENSG00000144455	SUMF1	GO:0046872(metal ion binding);GO:0016491(oxidoreductase activity);GO:0055114(oxidation-reduction process);GO:0005783(endoplasmic reticulum);GO:0005788(endoplasmic reticulum lumen);GO:0006687(glycosphingolipid metabolic process);GO:0043687(post-translational protein modification);GO:0042803(protein homodimerization activity)	04142(Lysosome)	NA	NA	sulfatase modifying factor 1 [Source:HGNC Symbol;Acc:HGNC:20376]	0	0	0.916227	0.800469	-inf	-inf	2.19539e-05	0.00198831
chr1	+	33314065	33325467	ENST00000624012	antisense_RNA	2	1047	ENSG00000225313	AL513327.1	NA	NA	NA	NA	NA	0	0	0.978121	0.766892	-inf	-inf	2.45575e-05	0.00219446
chr6	+	143502919	143506025	ENST00000619849	retained_intron	4	982	ENSG00000229036	VDAC1P8	NA	NA	NA	NA	voltage dependent anion channel 1 pseudogene 8 [Source:HGNC Symbol;Acc:HGNC:37483]	0	0	0.865139	0.811018	-inf	-inf	3.17774e-05	0.00279177
chr7	+	139778136	139782729	ENST00000473948	processed_transcript	4	241	ENSG00000059377	TBXAS1	GO:0016020(membrane);GO:0016021(integral component of membrane);GO:0046872(metal ion binding);GO:0016853(isomerase activity);GO:0004497(monooxygenase activity);GO:0016491(oxidoreductase activity);GO:0055114(oxidation-reduction process);GO:0006629(lipid metabolic process);GO:0005783(endoplasmic reticulum);GO:0005789(endoplasmic reticulum membrane);GO:0006631(fatty acid metabolic process);GO:000663…	00590(Arachidonic acid metabolism);04611(Platelet activation)	NA	NA	thromboxane A synthase 1 [Source:HGNC Symbol;Acc:HGNC:11609]	0	0	0.208726	0	-inf	-inf	1	1
chr8	-	17656026	17722639	ENST00000524044	processed_transcript	6	567	ENSG00000129422	MTUS1	GO:0005634(nucleus);GO:0005737(cytoplasm);GO:0016020(membrane);GO:0005730(nucleolus);GO:0005794(Golgi apparatus);GO:0005739(mitochondrion);GO:0005886(plasma membrane);GO:0015630(microtubule cytoskeleton);GO:0005856(cytoskeleton);GO:0005615(extracellular space);GO:0005874(microtubule);GO:0005815(microtubule organizing center);GO:0005819(spindle)	NA	NA	NA	microtubule associated scaffold protein 1 [Source:HGNC Symbol;Acc:HGNC:29789]	0	0	0.013812	0.013005	-inf	-inf	1	1
chr4	+	41084607	41084713	ENST00000362920	snRNA	1	107	ENSG00000199790	RNU6-836P	NA	NA	NA	NA	RNA, U6 small nuclear 836, pseudogene [Source:HGNC Symbol;Acc:HGNC:47799]	0	0	0	0.11244	-inf	-inf	1	1
chr1	+	61852499	61852602	ENST00000391058	snRNA	1	104	ENSG00000212360	RNU6-1177P	NA	NA	NA	NA	RNA, U6 small nuclear 1177, pseudogene [Source:HGNC Symbol;Acc:HGNC:48140]	0	0	0	0.291074	-inf	-inf	1	1
chr13	+	113001714	113099735	ENST00000375604	protein_coding	30	6445	ENSG00000126217	MCF2L	GO:0005737(cytoplasm);GO:0016020(membrane);GO:0035556(intracellular signal transduction);GO:0005886(plasma membrane);GO:0005089(Rho guanyl-nucleotide exchange factor activity);GO:0035023(regulation of Rho protein signal transduction);GO:0043547(positive regulation of GTPase activity);GO:0005615(extracellular space);GO:0005085(guanyl-nucleotide exchange factor activity);GO:0008289(lipid binding);G…	NA	NA	NA	MCF.2 cell line derived transforming sequence like [Source:HGNC Symbol;Acc:HGNC:14576]	0	0	0	0.151504	-inf	-inf	1	1
chr9	+	36267783	36267922	ENST00000410828	snRNA	1	140	ENSG00000222760	RNU4-53P	NA	NA	NA	NA	RNA, U4 small nuclear 53, pseudogene [Source:HGNC Symbol;Acc:HGNC:46989]	0	0	0	0.12336	-inf	-inf	1	1
chr4	-	15638539	15659867	ENST00000503196	protein_coding	4	595	ENSG00000118564	FBXL5	GO:0005737(cytoplasm);GO:0046872(metal ion binding);GO:0016567(protein ubiquitination);GO:0005515(protein binding);GO:0048471(perinuclear region of cytoplasm);GO:0005506(iron ion binding);GO:0005829(cytosol);GO:0000209(protein polyubiquitination);GO:0043687(post-translational protein modification);GO:0004842(ubiquitin-protein transferase activity);GO:0000151(ubiquitin ligase complex);GO:0006879(c…	NA	NA	NA	F-box and leucine rich repeat protein 5 [Source:HGNC Symbol;Acc:HGNC:13602]	0	0	0.073002	0.305894	-inf	-inf	1	1
chr17	-	3469317	3513768	ENST00000570318	protein_coding	2	240	ENSG00000141255	SPATA22	GO:0005694(chromosome);GO:0005515(protein binding);GO:0007276(gamete generation);GO:0051321(meiotic cell cycle);GO:0000711(meiotic DNA repair synthesis);GO:0007129(synapsis)	NA	NA	NA	spermatogenesis associated 22 [Source:HGNC Symbol;Acc:HGNC:30705]	0	0	0	0.052124	-inf	-inf	1	1
chr11	-	64741026	64744997	ENST00000377485	protein_coding	5	429	ENSG00000068831	RASGRP2	GO:0005737(cytoplasm);GO:0016020(membrane);GO:0007264(small GTPase mediated signal transduction);GO:0046872(metal ion binding);GO:0035556(intracellular signal transduction);GO:0005509(calcium ion binding);GO:0005829(cytosol);GO:0005886(plasma membrane);GO:0042995(cell projection);GO:0007165(signal transduction);GO:0030054(cell junction);GO:0045202(synapse);GO:0005085(guanyl-nucleotide exchange fa…	04014(Ras signaling pathway);04015(Rap1 signaling pathway);04010(MAPK signaling pathway);04611(Platelet activation);04062(Chemokine signaling pathway);05200(Pathways in cancer)	NA	NA	RAS guanyl releasing protein 2 [Source:HGNC Symbol;Acc:HGNC:9879]	0	0	0.051443	0.050223	-inf	-inf	1	1
chr8	+	18720905	18734405	ENST00000524252	antisense_RNA	3	2054	ENSG00000187229	AC100800.1	NA	NA	NA	NA	NA	0	0	0	0.056673	-inf	-inf	1	1
chr12	-	75304870	75390901	ENST00000436898	protein_coding	7	599	ENSG00000180881	CAPS2	GO:0005509(calcium ion binding);GO:0046872(metal ion binding);GO:0035725(sodium ion transmembrane transport);GO:0005432(calcium:sodium antiporter activity);GO:0055074(calcium ion homeostasis)	NA	NA	NA	calcyphosine 2 [Source:HGNC Symbol;Acc:HGNC:16471]	0	0	0	0.867306	-inf	-inf	1	1
chr6	-	104833060	104859560	ENST00000524020	protein_coding	6	622	ENSG00000085382	HACE1	GO:0005737(cytoplasm);GO:0016020(membrane);GO:0005783(endoplasmic reticulum);GO:0016740(transferase activity);GO:0006351(transcription, DNA-templated);GO:0006355(regulation of transcription, DNA-templated);GO:0016567(protein ubiquitination);GO:0005794(Golgi apparatus);GO:0004842(ubiquitin-protein transferase activity);GO:0005515(protein binding);GO:0007049(cell cycle);GO:0000139(Golgi membrane);G…	NA	NA	NA	HECT domain and ankyrin repeat containing E3 ubiquitin protein ligase 1 [Source:HGNC Symbol;Acc:HGNC:21033]	0	0	0	0.092328	-inf	-inf	1	1
chr14	-	88504425	88551460	ENST00000555243	protein_coding	6	1014	ENSG00000070778	PTPN21	GO:0005737(cytoplasm);GO:0016787(hydrolase activity);GO:0004725(protein tyrosine phosphatase activity);GO:0016791(phosphatase activity);GO:0006470(protein dephosphorylation);GO:0016311(dephosphorylation);GO:0035335(peptidyl-tyrosine dephosphorylation);GO:0004721(phosphoprotein phosphatase activity);GO:0005856(cytoskeleton);GO:0005515(protein binding)	NA	NA	NA	protein tyrosine phosphatase, non-receptor type 21 [Source:HGNC Symbol;Acc:HGNC:9651]	0	0	0.062866	0	-inf	-inf	1	1
chrX	-	82497669	82497924	ENST00000448435	processed_pseudogene	1	256	ENSG00000228041	AL031313.1	NA	NA	NA	NA	NA	0	0	0.042751	0	-inf	-inf	1	1
chr17	-	39067132	39132037	ENST00000493200	processed_transcript	13	2602	ENSG00000161381	PLXDC1	GO:0005737(cytoplasm);GO:0016020(membrane);GO:0016021(integral component of membrane);GO:0005886(plasma membrane);GO:0005576(extracellular region);GO:0030054(cell junction);GO:0001525(angiogenesis);GO:0005923(bicellular tight junction);GO:0005515(protein binding);GO:0043235(receptor complex);GO:0021510(spinal cord development);GO:0030425(dendrite);GO:0043025(neuronal cell body)	NA	NA	NA	plexin domain containing 1 [Source:HGNC Symbol;Acc:HGNC:20945]	0	0	0	0.007441	-inf	-inf	1	1
chr3	-	120694153	120710546	ENST00000468192	processed_transcript	5	672	ENSG00000144840	RABL3	GO:0005622(intracellular);GO:0005525(GTP binding);GO:0007264(small GTPase mediated signal transduction);GO:0000166(nucleotide binding)	NA	NA	NA	RAB, member of RAS oncogene family like 3 [Source:HGNC Symbol;Acc:HGNC:18072]	0	0	0.007769	0.05833	-inf	-inf	1	1
chr16	-	30092778	30096208	ENST00000568674	processed_transcript	5	371	ENSG00000090238	YPEL3	GO:0005634(nucleus);GO:0046872(metal ion binding);GO:0005730(nucleolus);GO:2000774(positive regulation of cellular senescence)	NA	NA	NA	yippee like 3 [Source:HGNC Symbol;Acc:HGNC:18327]	0	0	0	0.088589	-inf	-inf	1	1
chr1	+	200054061	200054165	ENST00000517051	snRNA	1	105	ENSG00000252860	RNU6-570P	NA	NA	NA	NA	RNA, U6 small nuclear 570, pseudogene [Source:HGNC Symbol;Acc:HGNC:47533]	0	0	0.084149	0	-inf	-inf	1	1
chr16	-	71859776	71884204	ENST00000564134	protein_coding	7	1748	ENSG00000102984	ZNF821	GO:0003676(nucleic acid binding);GO:0005634(nucleus);GO:0046872(metal ion binding);GO:0006351(transcription, DNA-templated);GO:0006355(regulation of transcription, DNA-templated);GO:0003677(DNA binding);GO:0005515(protein binding);GO:0003700(transcription factor activity, sequence-specific DNA binding);GO:0045944(positive regulation of transcription from RNA polymerase II promoter);GO:0044212(tra…	NA	NA	NA	zinc finger protein 821 [Source:HGNC Symbol;Acc:HGNC:28043]	0	0	0	0.002304	-inf	-inf	1	1
chr2	+	235883395	236036697	ENST00000448025	protein_coding	6	757	ENSG00000157985	AGAP1	GO:0006810(transport);GO:0005737(cytoplasm);GO:0015031(protein transport);GO:0005525(GTP binding);GO:0046872(metal ion binding);GO:0000166(nucleotide binding);GO:0003924(GTPase activity);GO:0043547(positive regulation of GTPase activity);GO:0005096(GTPase activator activity);GO:0005543(phospholipid binding)	04144(Endocytosis)	NA	NA	ArfGAP with GTPase domain, ankyrin repeat and PH domain 1 [Source:HGNC Symbol;Acc:HGNC:16922]	0	0	0.60551	0	-inf	-inf	1	1
chr15	+	41774524	41827853	ENST00000456763	protein_coding	32	7158	ENSG00000137802	MAPKBP1	GO:0005634(nucleus);GO:0005737(cytoplasm);GO:0005856(cytoskeleton);GO:0005515(protein binding);GO:0000922(spindle pole);GO:0003723(RNA binding);GO:2000483(negative regulation of interleukin-8 secretion);GO:0005682(U5 snRNP);GO:0097431(mitotic spindle pole);GO:0043124(negative regulation of I-kappaB kinase/NF-kappaB signaling);GO:0008380(RNA splicing);GO:0071011(precatalytic spliceosome);GO:007101…	NA	NA	NA	mitogen-activated protein kinase binding protein 1 [Source:HGNC Symbol;Acc:HGNC:29536]	0	0	0	0.001035	-inf	-inf	1	1
chr17	+	28735278	28738245	ENST00000592510	protein_coding	5	782	ENSG00000160602	NEK8	GO:0004672(protein kinase activity);GO:0005524(ATP binding);GO:0006468(protein phosphorylation);GO:0005737(cytoplasm);GO:0046872(metal ion binding);GO:0000166(nucleotide binding);GO:0004674(protein serine/threonine kinase activity);GO:0016740(transferase activity);GO:0016301(kinase activity);GO:0016310(phosphorylation);GO:0005856(cytoskeleton);GO:0042995(cell projection);GO:0005515(protein bindin…	NA	NA	NA	NIMA related kinase 8 [Source:HGNC Symbol;Acc:HGNC:13387]	0	0	0.127954	0	-inf	-inf	1	1
chrX	-	72781865	72782660	ENST00000596535	protein_coding	3	465	ENSG00000268994	FAM236B	NA	NA	NA	NA	family with sequence similarity 236 member B [Source:HGNC Symbol;Acc:HGNC:52640]	0	0	0.182416	0	-inf	-inf	1	1
chr1	-	166059901	166166234	ENST00000441649	nonsense_mediated_decay	3	2264	ENSG00000188859	FAM78B	NA	NA	NA	NA	family with sequence similarity 78 member B [Source:HGNC Symbol;Acc:HGNC:13495]	0	0	0.044933	0	-inf	-inf	1	1
chr11	-	74840910	74949149	ENST00000321448	protein_coding	16	4695	ENSG00000166435	XRRA1	GO:0005634(nucleus);GO:0005737(cytoplasm);GO:0005654(nucleoplasm);GO:0016604(nuclear body);GO:0003674(molecular_function);GO:0010165(response to X-ray)	NA	NA	NA	X-ray radiation resistance associated 1 [Source:HGNC Symbol;Acc:HGNC:18868]	0	0	0	0.149616	-inf	-inf	1	1
chr7	-	101313694	101321794	ENST00000422177	nonsense_mediated_decay	6	1785	ENSG00000128581	IFT22	GO:0005525(GTP binding);GO:0007264(small GTPase mediated signal transduction);GO:0000166(nucleotide binding);GO:0042995(cell projection);GO:0035735(intraciliary transport involved in cilium assembly);GO:0005929(cilium);GO:0030992(intraciliary transport particle B);GO:0097542(ciliary tip);GO:0005813(centrosome)	NA	NA	NA	intraflagellar transport 22 [Source:HGNC Symbol;Acc:HGNC:21895]	0	0	0	0.301525	-inf	-inf	1	1
chr2	+	97669799	97677755	ENST00000596356	nonsense_mediated_decay	5	650	ENSG00000228486	LINC01125	GO:0016020(membrane);GO:0016021(integral component of membrane)	NA	NA	NA	long intergenic non-protein coding RNA 1125 [Source:HGNC Symbol;Acc:HGNC:49272]	0	0	0	0.067469	-inf	-inf	1	1
chr12	+	69449470	69460724	ENST00000549261	lincRNA	3	423	ENSG00000257507	LINC02373	NA	NA	NA	NA	long intergenic non-protein coding RNA 2373 [Source:HGNC Symbol;Acc:HGNC:53295]	0	0	0	0.101496	-inf	-inf	1	1
chr19	+	10780254	10780335	ENST00000578076	miRNA	1	82	ENSG00000265879	MIR4748	NA	NA	NA	NA	microRNA 4748 [Source:HGNC Symbol;Acc:HGNC:41557]	0	0	0	0.028397	-inf	-inf	1	1
chr2	-	70182397	70190907	ENST00000495353	processed_transcript	3	535	ENSG00000115998	C2orf42	GO:0005634(nucleus);GO:0031965(nuclear membrane);GO:0005515(protein binding)	NA	NA	NA	chromosome 2 open reading frame 42 [Source:HGNC Symbol;Acc:HGNC:26056]	0	0	0	0.022025	-inf	-inf	1	1
chr6	+	5404542	5431810	ENST00000445533	protein_coding	3	434	ENSG00000145982	FARS2	GO:0005737(cytoplasm);GO:0006412(translation);GO:0000166(nucleotide binding);GO:0005524(ATP binding);GO:0008033(tRNA processing);GO:0005739(mitochondrion);GO:0016874(ligase activity);GO:0005515(protein binding);GO:0005759(mitochondrial matrix);GO:0004826(phenylalanine-tRNA ligase activity);GO:0004812(aminoacyl-tRNA ligase activity);GO:0000049(tRNA binding);GO:0043039(tRNA aminoacylation);GO:00064…	00970(Aminoacyl-tRNA biosynthesis)	NA	NA	phenylalanyl-tRNA synthetase 2, mitochondrial [Source:HGNC Symbol;Acc:HGNC:21062]	0	0	0	1.05872	-inf	-inf	1	1
chr2	-	241137007	241139595	ENST00000433589	protein_coding	4	578	ENSG00000115687	PASK	GO:0005634(nucleus);GO:0005737(cytoplasm);GO:0000166(nucleotide binding);GO:0004672(protein kinase activity);GO:0004674(protein serine/threonine kinase activity);GO:0005524(ATP binding);GO:0006468(protein phosphorylation);GO:0005829(cytosol);GO:0016740(transferase activity);GO:0016301(kinase activity);GO:0016310(phosphorylation);GO:0005515(protein binding);GO:0045727(positive regulation of transl…	NA	NA	NA	PAS domain containing serine/threonine kinase [Source:HGNC Symbol;Acc:HGNC:17270]	0	0	0.032255	0.002518	-inf	-inf	1	1
chr2	+	241315355	241335212	ENST00000445030	protein_coding	5	575	ENSG00000168385	SEPT2	GO:0005634(nucleus);GO:0005737(cytoplasm);GO:0016020(membrane);GO:0005525(GTP binding);GO:0000166(nucleotide binding);GO:0005730(nucleolus);GO:0005829(cytosol);GO:0051301(cell division);GO:0005694(chromosome);GO:0005886(plasma membrane);GO:0015629(actin cytoskeleton);GO:0005856(cytoskeleton);GO:0042995(cell projection);GO:0005515(protein binding);GO:0007049(cell cycle);GO:0030154(cell differentia…	05100(Bacterial invasion of epithelial cells)	NA	NA	septin 2 [Source:HGNC Symbol;Acc:HGNC:7729]	0	0	0.260799	0	-inf	-inf	1	1
chr13	+	98328783	98333161	ENST00000593990	processed_transcript	3	871	ENSG00000152767	FARP1	GO:0005089(Rho guanyl-nucleotide exchange factor activity);GO:0035023(regulation of Rho protein signal transduction);GO:0043547(positive regulation of GTPase activity);GO:0005856(cytoskeleton);GO:0008092(cytoskeletal protein binding);GO:0005737(cytoplasm);GO:0016020(membrane);GO:0005829(cytosol);GO:0005886(plasma membrane);GO:0042995(cell projection);GO:0007275(multicellular organism development)…	NA	NA	NA	FERM, ARH/RhoGEF and pleckstrin domain protein 1 [Source:HGNC Symbol;Acc:HGNC:3591]	0	0	0.110427	0	-inf	-inf	1	1
chr14	-	55782067	55796688	ENST00000560336	lincRNA	3	883	ENSG00000258791	LINC00520	NA	NA	NA	NA	long intergenic non-protein coding RNA 520 [Source:HGNC Symbol;Acc:HGNC:19843]	0	0	0	0.075077	-inf	-inf	1	1
chr12	-	10806051	10807293	ENST00000240615	protein_coding	1	1243	ENSG00000121314	TAS2R8	GO:0016020(membrane);GO:0016021(integral component of membrane);GO:0004930(G-protein coupled receptor activity);GO:0007186(G-protein coupled receptor signaling pathway);GO:0004871(signal transducer activity);GO:0007165(signal transduction);GO:0050896(response to stimulus);GO:0005886(plasma membrane);GO:0050909(sensory perception of taste);GO:0001580(detection of chemical stimulus involved in sens…	04742(Taste transduction)	K08474	NA	taste 2 receptor member 8 [Source:HGNC Symbol;Acc:HGNC:14915]	0	0	0	0.029662	-inf	-inf	1	1
chr4	+	2811798	2827670	ENST00000512014	protein_coding	7	688	ENSG00000087266	SH3BP2	GO:0009967(positive regulation of signal transduction);GO:0005515(protein binding);GO:0017124(SH3 domain binding);GO:0007165(signal transduction);GO:0001784(phosphotyrosine residue binding);GO:0005070(SH3/SH2 adaptor activity)	04650(Natural killer cell mediated cytotoxicity)	NA	NA	SH3 domain binding protein 2 [Source:HGNC Symbol;Acc:HGNC:10825]	0	0	0	0.041079	-inf	-inf	1	1
chr22	-	36236927	36239582	ENST00000489186	processed_transcript	2	579	ENSG00000128335	APOL2	GO:0006810(transport);GO:0005737(cytoplasm);GO:0016020(membrane);GO:0016021(integral component of membrane);GO:0005576(extracellular region);GO:0006629(lipid metabolic process);GO:0005789(endoplasmic reticulum membrane);GO:0042157(lipoprotein metabolic process);GO:0006869(lipid transport);GO:0008289(lipid binding);GO:0007275(multicellular organism development);GO:0008203(cholesterol metabolic pro…	NA	NA	NA	apolipoprotein L2 [Source:HGNC Symbol;Acc:HGNC:619]	0	0	0.042748	0	-inf	-inf	1	1
chr19	-	45609638	45645629	ENST00000587152	protein_coding	22	2763	ENSG00000125746	EML2	GO:0016020(membrane);GO:0016021(integral component of membrane);GO:0005737(cytoplasm);GO:0005856(cytoskeleton);GO:0005515(protein binding);GO:0005874(microtubule);GO:0008017(microtubule binding);GO:0005819(spindle);GO:0007601(visual perception);GO:0015631(tubulin binding);GO:0005875(microtubule associated complex);GO:0007605(sensory perception of sound);GO:0072686(mitotic spindle);GO:0010968(regu…	NA	NA	NA	echinoderm microtubule associated protein like 2 [Source:HGNC Symbol;Acc:HGNC:18035]	0	0	0	0.015416	-inf	-inf	1	1
chr1	-	201484677	201507123	ENST00000526317	processed_transcript	4	374	ENSG00000159176	CSRP1	GO:0003723(RNA binding);GO:0005634(nucleus);GO:0046872(metal ion binding);GO:0005925(focal adhesion);GO:0070062(extracellular exosome);GO:0070527(platelet aggregation);GO:0008270(zinc ion binding)	NA	NA	NA	cysteine and glycine rich protein 1 [Source:HGNC Symbol;Acc:HGNC:2469]	0	0	0	0.096092	-inf	-inf	1	1
chr11	-	85694224	85811159	ENST00000389960	protein_coding	19	4299	ENSG00000137501	SYTL2	GO:0006887(exocytosis);GO:0017137(Rab GTPase binding);GO:0005737(cytoplasm);GO:0016020(membrane);GO:0006886(intracellular protein transport);GO:0005886(plasma membrane);GO:0005515(protein binding);GO:0042470(melanosome);GO:0016192(vesicle-mediated transport);GO:0005509(calcium ion binding);GO:0005544(calcium-dependent phospholipid binding);GO:0019905(syntaxin binding);GO:0030276(clathrin binding)…	NA	NA	NA	synaptotagmin like 2 [Source:HGNC Symbol;Acc:HGNC:15585]	0	0	0.002258	0	-inf	-inf	1	1
chr11	-	8712600	8810673	ENST00000528527	protein_coding	7	940	ENSG00000166444	ST5	GO:0043547(positive regulation of GTPase activity);GO:0005085(guanyl-nucleotide exchange factor activity);GO:0017112(Rab guanyl-nucleotide exchange factor activity)	NA	NA	NA	suppression of tumorigenicity 5 [Source:HGNC Symbol;Acc:HGNC:11350]	0	0	0	0.679073	-inf	-inf	1	1
chr19	+	34927044	34945009	ENST00000601142	protein_coding	5	2280	ENSG00000168661	ZNF30	GO:0003676(nucleic acid binding);GO:0005634(nucleus);GO:0046872(metal ion binding);GO:0006355(regulation of transcription, DNA-templated);GO:0006351(transcription, DNA-templated);GO:0003677(DNA binding);GO:0005622(intracellular);GO:0003700(transcription factor activity, sequence-specific DNA binding)	NA	NA	NA	zinc finger protein 30 [Source:HGNC Symbol;Acc:HGNC:13090]	0	0	0	0.493483	-inf	-inf	1	1
chr17	-	9915255	10036747	ENST00000585266	protein_coding	14	3535	ENSG00000007237	GAS7	GO:0005737(cytoplasm);GO:0005515(protein binding);GO:0007275(multicellular organism development);GO:0007399(nervous system development);GO:0030154(cell differentiation);GO:0006355(regulation of transcription, DNA-templated);GO:0003700(transcription factor activity, sequence-specific DNA binding);GO:0007050(cell cycle arrest)	NA	NA	NA	growth arrest specific 7 [Source:HGNC Symbol;Acc:HGNC:4169]	0	0	0	0.002635	-inf	-inf	1	1
chrX	+	30671635	30672166	ENST00000441146	sense_intronic	2	397	ENSG00000229331	GK-IT1	NA	NA	NA	NA	GK intronic transcript 1 [Source:HGNC Symbol;Acc:HGNC:41339]	0	0	0	0.064118	-inf	-inf	1	1
chr16	+	56451521	56467198	ENST00000561646	protein_coding	7	584	ENSG00000087263	OGFOD1	GO:0005634(nucleus);GO:0005737(cytoplasm);GO:0046872(metal ion binding);GO:0005829(cytosol);GO:0016491(oxidoreductase activity);GO:0055114(oxidation-reduction process);GO:0005506(iron ion binding);GO:0016705(oxidoreductase activity, acting on paired donors, with incorporation or reduction of molecular oxygen);GO:0031418(L-ascorbic acid binding);GO:0051213(dioxygenase activity);GO:0016706(oxidored…	NA	NA	NA	2-oxoglutarate and iron dependent oxygenase domain containing 1 [Source:HGNC Symbol;Acc:HGNC:25585]	0	0	0.01291	0	-inf	-inf	1	1
chr10	+	37184442	37193208	ENST00000475522	processed_transcript	7	438	ENSG00000148513	ANKRD30A	GO:0005634(nucleus);GO:0006355(regulation of transcription, DNA-templated);GO:0003677(DNA binding);GO:0003700(transcription factor activity, sequence-specific DNA binding)	NA	NA	NA	ankyrin repeat domain 30A [Source:HGNC Symbol;Acc:HGNC:17234]	0	0	0.018382	0	-inf	-inf	1	1
chr15	-	99395179	99396593	ENST00000561362	lincRNA	2	323	ENSG00000259590	AC015660.2	NA	NA	NA	NA	NA	0	0	0	0.257163	-inf	-inf	1	1
chr18	+	79610747	79612303	ENST00000587527	lincRNA	2	585	ENSG00000267409	AC068473.4	NA	NA	NA	NA	NA	0	0	0.09497	0	-inf	-inf	1	1
chr15	-	64815632	64825668	ENST00000333425	protein_coding	13	2278	ENSG00000140451	PIF1	GO:0005634(nucleus);GO:0000166(nucleotide binding);GO:0005524(ATP binding);GO:0016787(hydrolase activity);GO:0004386(helicase activity);GO:0032508(DNA duplex unwinding);GO:0003677(DNA binding);GO:0005739(mitochondrion);GO:0006281(DNA repair);GO:0000723(telomere maintenance);GO:0006310(DNA recombination);GO:0006974(cellular response to DNA damage stimulus);GO:0003678(DNA helicase activity);GO:0005…	NA	NA	NA	PIF1 5'-to-3' DNA helicase [Source:HGNC Symbol;Acc:HGNC:26220]	0	0	0	0.086451	-inf	-inf	1	1
chr16	+	71372178	71385636	ENST00000490520	protein_coding	8	472	ENSG00000172137	CALB2	GO:0046872(metal ion binding);GO:0005829(cytosol);GO:0005509(calcium ion binding);GO:0005634(nucleus);GO:0051480(regulation of cytosolic calcium ion concentration);GO:0005737(cytoplasm);GO:0005921(gap junction);GO:0043195(terminal bouton);GO:0045202(synapse);GO:0043005(neuron projection)	NA	NA	NA	calbindin 2 [Source:HGNC Symbol;Acc:HGNC:1435]	0	0	0.063076	0	-inf	-inf	1	1
chr6	-	142966421	143038077	ENST00000419957	lincRNA	3	2398	ENSG00000229017	LINC01277	NA	NA	NA	NA	long intergenic non-protein coding RNA 1277 [Source:HGNC Symbol;Acc:HGNC:50334]	0	0	0	0.014874	-inf	-inf	1	1
chr19	-	42509100	42512411	ENST00000488639	processed_transcript	5	429	ENSG00000079385	CEACAM1	GO:0016020(membrane);GO:0016021(integral component of membrane);GO:0007155(cell adhesion);GO:0003779(actin binding);GO:0042803(protein homodimerization activity);GO:0005886(plasma membrane);GO:0042995(cell projection);GO:0005515(protein binding);GO:0005576(extracellular region);GO:0030054(cell junction);GO:0031410(cytoplasmic vesicle);GO:0007229(integrin-mediated signaling pathway);GO:0050900(leu…	NA	NA	NA	carcinoembryonic antigen related cell adhesion molecule 1 [Source:HGNC Symbol;Acc:HGNC:1814]	0	0	0.084107	0	-inf	-inf	1	1
chr5	+	82824884	82825184	ENST00000514930	processed_pseudogene	1	301	ENSG00000248105	AC008885.1	NA	NA	NA	NA	NA	0	0	0	0.027721	-inf	-inf	1	1
chr6	-	28432655	28443467	ENST00000289788	protein_coding	4	3126	ENSG00000187987	ZSCAN23	GO:0005634(nucleus);GO:0006355(regulation of transcription, DNA-templated);GO:0003700(transcription factor activity, sequence-specific DNA binding);GO:0003676(nucleic acid binding);GO:0046872(metal ion binding);GO:0006351(transcription, DNA-templated);GO:0003677(DNA binding);GO:0070062(extracellular exosome)	NA	NA	NA	zinc finger and SCAN domain containing 23 [Source:HGNC Symbol;Acc:HGNC:21193]	0	0	0.034432	0	-inf	-inf	1	1
chr9	+	122264904	122322724	ENST00000373729	protein_coding	7	870	ENSG00000148187	MRRF	GO:0006412(translation);GO:0005739(mitochondrion);GO:0032790(ribosome disassembly);GO:0005759(mitochondrial matrix);GO:0043023(ribosomal large subunit binding);GO:0070126(mitochondrial translational termination)	NA	NA	NA	mitochondrial ribosome recycling factor [Source:HGNC Symbol;Acc:HGNC:7234]	0	0	0.160882	0	-inf	-inf	1	1
chr10	+	113353425	113353484	ENST00000458864	snRNA	1	60	ENSG00000238380	RNU7-165P	NA	NA	NA	NA	RNA, U7 small nuclear 165 pseudogene [Source:HGNC Symbol;Acc:HGNC:45699]	0	0	0	0.194049	-inf	-inf	1	1
chr15	-	84648457	84654241	ENST00000560182	retained_intron	4	542	ENSG00000177082	WDR73	GO:0005737(cytoplasm);GO:0005829(cytosol);GO:0005856(cytoskeleton);GO:0000922(spindle pole);GO:0005819(spindle);GO:0032154(cleavage furrow)	NA	NA	NA	WD repeat domain 73 [Source:HGNC Symbol;Acc:HGNC:25928]	0	0	0.26821	0	-inf	-inf	1	1
chr16	-	50727417	50742815	ENST00000563315	antisense_RNA	6	2296	ENSG00000261644	AC007728.2	NA	NA	NA	NA	NA	0	0	0.026397	0.020512	-inf	-inf	1	1
chr12	+	31477506	31477987	ENST00000544433	processed_pseudogene	1	482	ENSG00000256159	AC022080.3	NA	NA	NA	NA	NA	0	0	0	0.115141	-inf	-inf	1	1
chr2	-	201420417	201433554	ENST00000440597	protein_coding	2	381	ENSG00000115993	TRAK2	GO:0006810(transport);GO:0005737(cytoplasm);GO:0005739(mitochondrion);GO:0005886(plasma membrane);GO:0005768(endosome);GO:0005515(protein binding);GO:0005769(early endosome);GO:0005102(receptor binding);GO:0019894(kinesin binding);GO:0019899(enzyme binding);GO:0050811(GABA receptor binding);GO:0006357(regulation of transcription from RNA polymerase II promoter);GO:0006493(protein O-linked glycosy…	04727(GABAergic synapse)	NA	NA	trafficking kinesin protein 2 [Source:HGNC Symbol;Acc:HGNC:13206]	0	0	0	0.088427	-inf	-inf	1	1
chr3	-	164001606	164002465	ENST00000483240	processed_pseudogene	1	860	ENSG00000214210	AC084017.1	NA	NA	NA	NA	NA	0	0	0	0.016246	-inf	-inf	1	1
chr4	-	118193405	118194751	ENST00000507284	processed_pseudogene	1	1347	ENSG00000251463	FKBP4P1	NA	NA	NA	NA	FK506 binding protein 4 pseudogene 1 [Source:HGNC Symbol;Acc:HGNC:44038]	0	0	0	0.050277	-inf	-inf	1	1
chr2	+	95297304	95386083	ENST00000295225	protein_coding	9	2940	ENSG00000115041	KCNIP3	GO:0006810(transport);GO:0005634(nucleus);GO:0005737(cytoplasm);GO:0016020(membrane);GO:0046872(metal ion binding);GO:0006351(transcription, DNA-templated);GO:0006355(regulation of transcription, DNA-templated);GO:0005509(calcium ion binding);GO:0005794(Golgi apparatus);GO:0005829(cytosol);GO:0005783(endoplasmic reticulum);GO:0005244(voltage-gated ion channel activity);GO:0005267(potassium channe…	NA	NA	NA	potassium voltage-gated channel interacting protein 3 [Source:HGNC Symbol;Acc:HGNC:15523]	0	0	0.058541	0.037641	-inf	-inf	1	1
chr17	-	778641	782255	ENST00000628529	protein_coding	2	111	ENSG00000167699	GLOD4	GO:0005739(mitochondrion);GO:0045296(cadherin binding);GO:0070062(extracellular exosome)	NA	NA	NA	glyoxalase domain containing 4 [Source:HGNC Symbol;Acc:HGNC:14111]	0	0	0	0.020114	-inf	-inf	1	1
chr11	+	46123573	46177106	ENST00000635144	lincRNA	4	1206	ENSG00000255314	AC024475.4	NA	NA	NA	NA	NA	0	0	0.04246	0	-inf	-inf	1	1
chr2	+	42048774	42054540	ENST00000492861	retained_intron	3	693	ENSG00000162878	PKDCC	GO:0006810(transport);GO:0015031(protein transport);GO:0000166(nucleotide binding);GO:0004672(protein kinase activity);GO:0005524(ATP binding);GO:0006468(protein phosphorylation);GO:0016740(transferase activity);GO:0016301(kinase activity);GO:0016310(phosphorylation);GO:0005794(Golgi apparatus);GO:0004713(protein tyrosine kinase activity);GO:0005576(extracellular region);GO:0004715(non-membrane s…	NA	NA	NA	protein kinase domain containing, cytoplasmic [Source:HGNC Symbol;Acc:HGNC:25123]	0	0	0.112328	0	-inf	-inf	1	1
chr3	+	175124406	175655563	ENST00000489299	processed_transcript	11	1574	ENSG00000177694	NAALADL2	GO:0016020(membrane);GO:0016021(integral component of membrane);GO:0005515(protein binding)	NA	NA	NA	N-acetylated alpha-linked acidic dipeptidase like 2 [Source:HGNC Symbol;Acc:HGNC:23219]	0	0	0	0.019458	-inf	-inf	1	1
chr17	-	43094112	43125300	ENST00000497488	protein_coding	2	779	ENSG00000012048	BRCA1	GO:0045766(positive regulation of angiogenesis);GO:0010628(positive regulation of gene expression);GO:0071158(positive regulation of cell cycle arrest);GO:0045944(positive regulation of transcription from RNA polymerase II promoter);GO:0071356(cellular response to tumor necrosis factor);GO:0005634(nucleus);GO:0005737(cytoplasm);GO:0008270(zinc ion binding);GO:0046872(metal ion binding);GO:0016740…	04120(Ubiquitin mediated proteolysis);03440(Homologous recombination);03460(Fanconi anemia pathway);04151(PI3K-Akt signaling pathway);05206(MicroRNAs in cancer);05224(Breast cancer);01524(Platinum drug resistance)	NA	NA	BRCA1, DNA repair associated [Source:HGNC Symbol;Acc:HGNC:1100]	0	0	0.095449	0	-inf	-inf	1	1
chr12	+	57460135	57472260	ENST00000543426	protein_coding	10	3394	ENSG00000111087	GLI1	GO:0003676(nucleic acid binding);GO:0045893(positive regulation of transcription, DNA-templated);GO:0003677(DNA binding);GO:0008284(positive regulation of cell proliferation);GO:0007224(smoothened signaling pathway);GO:0005737(cytoplasm);GO:0005634(nucleus);GO:0046872(metal ion binding);GO:0005829(cytosol);GO:0005654(nucleoplasm);GO:0006351(transcription, DNA-templated);GO:0006355(regulation of t…	04340(Hedgehog signaling pathway);04024(cAMP signaling pathway);05200(Pathways in cancer);05217(Basal cell carcinoma)	K16797	NA	GLI family zinc finger 1 [Source:HGNC Symbol;Acc:HGNC:4317]	0	0	0.000354	0.085195	-inf	-inf	1	1
chr11	-	76206422	76210730	ENST00000532150	processed_transcript	2	461	ENSG00000085741	WNT11	GO:0005737(cytoplasm);GO:0005102(receptor binding);GO:0005576(extracellular region);GO:0007275(multicellular organism development);GO:0005515(protein binding);GO:0016055(Wnt signaling pathway);GO:0005578(proteinaceous extracellular matrix);GO:0005096(GTPase activator activity);GO:0045893(positive regulation of transcription, DNA-templated);GO:0032147(activation of protein kinase activity);GO:0005…	04310(Wnt signaling pathway);04390(Hippo signaling pathway);04150(mTOR signaling pathway);04550(Signaling pathways regulating pluripotency of stem cells);04916(Melanogenesis);05200(Pathways in cancer);05205(Proteoglycans in cancer);05225(Hepatocellular carcinoma);05226(Gastric cancer);05217(Basal cell carcinoma);05224(Breast cancer);05166(HTLV-I infection);05165(Human papillomavirus infection)	NA	NA	Wnt family member 11 [Source:HGNC Symbol;Acc:HGNC:12776]	0	0	0.126203	0	-inf	-inf	1	1
chr16	+	35148636	35154366	ENST00000623041	TEC	1	5731	ENSG00000280180	AC023824.7	NA	NA	NA	NA	NA	0	0	0	0.002506	-inf	-inf	1	1
chr2	-	70297011	70302056	ENST00000450256	nonsense_mediated_decay	4	936	ENSG00000035141	FAM136A	GO:0005737(cytoplasm)	NA	NA	NA	family with sequence similarity 136 member A [Source:HGNC Symbol;Acc:HGNC:25911]	0	0	0	0.3865	-inf	-inf	1	1
chr1	+	224179641	224179767	ENST00000365028	snoRNA	1	127	ENSG00000201898	SNORA72	NA	NA	NA	NA	Small nucleolar RNA SNORA72 [Source:RFAM;Acc:RF00139]	0	0	0.192904	0	-inf	-inf	1	1
chr2	-	174559572	174634579	ENST00000392547	protein_coding	8	4587	ENSG00000115935	WIPF1	GO:0005737(cytoplasm);GO:0003779(actin binding);GO:0015629(actin cytoskeleton);GO:0008154(actin polymerization or depolymerization);GO:0005856(cytoskeleton);GO:0042995(cell projection);GO:0005515(protein binding);GO:0031410(cytoplasmic vesicle);GO:0038096(Fc-gamma receptor signaling pathway involved in phagocytosis);GO:0030048(actin filament-based movement);GO:0051707(response to other organism);…	04144(Endocytosis)	K19475	NA	WAS/WASL interacting protein family member 1 [Source:HGNC Symbol;Acc:HGNC:12736]	0	0	0	0.005288	-inf	-inf	1	1
chr12	-	70638073	70754661	ENST00000440835	protein_coding	10	2818	ENSG00000153233	PTPRR	GO:0005737(cytoplasm);GO:0016020(membrane);GO:0016021(integral component of membrane);GO:0005829(cytosol);GO:0016787(hydrolase activity);GO:0005886(plasma membrane);GO:0004725(protein tyrosine phosphatase activity);GO:0016791(phosphatase activity);GO:0006470(protein dephosphorylation);GO:0016311(dephosphorylation);GO:0035335(peptidyl-tyrosine dephosphorylation);GO:0030054(cell junction);GO:000472…	04010(MAPK signaling pathway)	K04458	EC:3.1.3.48	protein tyrosine phosphatase, receptor type R [Source:HGNC Symbol;Acc:HGNC:9680]	0	0	0	0.201431	-inf	-inf	1	1
chr3	-	196247452	196287263	ENST00000412869	protein_coding	5	499	ENSG00000161217	PCYT1A	GO:0003824(catalytic activity);GO:0009058(biosynthetic process);GO:0005737(cytoplasm);GO:0016020(membrane);GO:0016740(transferase activity);GO:0006629(lipid metabolic process);GO:0005829(cytosol);GO:0005789(endoplasmic reticulum membrane);GO:0008654(phospholipid biosynthetic process);GO:0016779(nucleotidyltransferase activity);GO:0006656(phosphatidylcholine biosynthetic process);GO:0004105(cholin…	00564(Glycerophospholipid metabolism);00440(Phosphonate and phosphinate metabolism);05231(Choline metabolism in cancer)	NA	NA	phosphate cytidylyltransferase 1, choline, alpha [Source:HGNC Symbol;Acc:HGNC:8754]	0	0	0.162183	0.128798	-inf	-inf	1	1
chr11	-	75278716	75303670	ENST00000527385	nonsense_mediated_decay	8	563	ENSG00000137486	ARRB1	GO:0045944(positive regulation of transcription from RNA polymerase II promoter);GO:0006810(transport);GO:0005634(nucleus);GO:0005737(cytoplasm);GO:0016020(membrane);GO:0015031(protein transport);GO:0005654(nucleoplasm);GO:0006351(transcription, DNA-templated);GO:0006355(regulation of transcription, DNA-templated);GO:0016567(protein ubiquitination);GO:0007165(signal transduction);GO:0005886(plasm…	04010(MAPK signaling pathway);04340(Hedgehog signaling pathway);04144(Endocytosis);04062(Chemokine signaling pathway);04926(Relaxin signaling pathway);04740(Olfactory transduction);05032(Morphine addiction)	NA	NA	arrestin beta 1 [Source:HGNC Symbol;Acc:HGNC:711]	0	0	0	0.033088	-inf	-inf	1	1
chr3	-	50559454	50571027	ENST00000464080	processed_transcript	4	583	ENSG00000088543	C3orf18	GO:0016020(membrane);GO:0016021(integral component of membrane)	NA	NA	NA	chromosome 3 open reading frame 18 [Source:HGNC Symbol;Acc:HGNC:24837]	0	0	0	0.119734	-inf	-inf	1	1
chr12	+	109574807	109579289	ENST00000639206	protein_coding	3	367	ENSG00000110921	MVK	GO:0005524(ATP binding);GO:0016301(kinase activity);GO:0016310(phosphorylation);GO:0050728(negative regulation of inflammatory response);GO:0005737(cytoplasm);GO:0000166(nucleotide binding);GO:0016740(transferase activity);GO:0006629(lipid metabolic process);GO:0005829(cytosol);GO:0006694(steroid biosynthetic process);GO:0008202(steroid metabolic process);GO:0008299(isoprenoid biosynthetic proces…	00900(Terpenoid backbone biosynthesis);04146(Peroxisome)	NA	NA	mevalonate kinase [Source:HGNC Symbol;Acc:HGNC:7530]	0	0	0.091238	0.248655	-inf	-inf	1	1
chr15	-	76225905	76311414	ENST00000560899	nonsense_mediated_decay	10	910	ENSG00000140374	ETFA	GO:0016491(oxidoreductase activity);GO:0050660(flavin adenine dinucleotide binding);GO:0055114(oxidation-reduction process);GO:0005739(mitochondrion);GO:0005759(mitochondrial matrix);GO:0009055(electron carrier activity);GO:0005515(protein binding);GO:0070062(extracellular exosome);GO:0033539(fatty acid beta-oxidation using acyl-CoA dehydrogenase);GO:0022904(respiratory electron transport chain)	NA	NA	NA	electron transfer flavoprotein alpha subunit [Source:HGNC Symbol;Acc:HGNC:3481]	0	0	1.11256	0	-inf	-inf	1	1
chr5	+	31923367	31923532	ENST00000506046	processed_pseudogene	1	166	ENSG00000249774	AC025458.1	NA	NA	NA	NA	NA	0	0	0	0.036238	-inf	-inf	1	1
chr2	-	143950945	143952053	ENST00000482961	processed_transcript	2	140	ENSG00000121964	GTDC1	GO:0016740(transferase activity);GO:0016757(transferase activity, transferring glycosyl groups)	NA	NA	NA	glycosyltransferase like domain containing 1 [Source:HGNC Symbol;Acc:HGNC:20887]	0	0	0.236669	0	-inf	-inf	1	1
chr6	+	146599005	146815462	ENST00000493950	nonsense_mediated_decay	32	6779	ENSG00000118492	ADGB	GO:0005622(intracellular);GO:0006508(proteolysis);GO:0004198(calcium-dependent cysteine-type endopeptidase activity);GO:0005737(cytoplasm)	NA	NA	NA	androglobin [Source:HGNC Symbol;Acc:HGNC:21212]	0	0	0.006221	0	-inf	-inf	1	1
chr19	+	35154753	35169865	ENST00000590686	protein_coding	9	862	ENSG00000089327	FXYD5	GO:0016020(membrane);GO:0005216(ion channel activity);GO:0006811(ion transport);GO:0034220(ion transmembrane transport);GO:0006810(transport);GO:0016021(integral component of membrane);GO:0003779(actin binding);GO:0005887(integral component of plasma membrane);GO:0017080(sodium channel regulator activity);GO:2000649(regulation of sodium ion transmembrane transporter activity);GO:0005515(protein b…	NA	NA	NA	FXYD domain containing ion transport regulator 5 [Source:HGNC Symbol;Acc:HGNC:4029]	0	0	0	1.52736	-inf	-inf	1	1
chr6	-	87444395	87445175	ENST00000401760	processed_pseudogene	1	781	ENSG00000218698	ST13P16	NA	NA	NA	NA	ST13, Hsp70 interacting protein pseudogene 16 [Source:HGNC Symbol;Acc:HGNC:38851]	0	0	0.02057	0.074663	-inf	-inf	1	1
chr1	-	9035107	9069716	ENST00000377424	protein_coding	12	4165	ENSG00000142583	SLC2A5	GO:0006810(transport);GO:0016020(membrane);GO:0016021(integral component of membrane);GO:0005215(transporter activity);GO:0055085(transmembrane transport);GO:0005886(plasma membrane);GO:0022857(transmembrane transporter activity);GO:0022891(substrate-specific transmembrane transporter activity);GO:0008643(carbohydrate transport);GO:1904659(glucose transmembrane transport);GO:0005887(integral comp…	04973(Carbohydrate digestion and absorption)	K08143	NA	solute carrier family 2 member 5 [Source:HGNC Symbol;Acc:HGNC:11010]	0	0	0	0.004075	-inf	-inf	1	1
chr8	+	85230163	85230715	ENST00000518392	retained_intron	2	461	ENSG00000185015	CA13	GO:0008270(zinc ion binding);GO:0046872(metal ion binding);GO:0016829(lyase activity);GO:0006730(one-carbon metabolic process);GO:0004089(carbonate dehydratase activity);GO:0005829(cytosol);GO:0015701(bicarbonate transport);GO:0043209(myelin sheath);GO:0043231(intracellular membrane-bounded organelle)	00910(Nitrogen metabolism)	NA	NA	carbonic anhydrase 13 [Source:HGNC Symbol;Acc:HGNC:14914]	0	0	0.089239	0.04226	-inf	-inf	1	1
chr5	-	179802313	179806305	ENST00000520019	processed_transcript	2	831	ENSG00000161013	MGAT4B	GO:0016020(membrane);GO:0005975(carbohydrate metabolic process);GO:0016758(transferase activity, transferring hexosyl groups);GO:0016021(integral component of membrane);GO:0046872(metal ion binding);GO:0016740(transferase activity);GO:0016757(transferase activity, transferring glycosyl groups);GO:0005794(Golgi apparatus);GO:0000139(Golgi membrane);GO:0006486(protein glycosylation);GO:0006491(N-gl…	00510(N-Glycan biosynthesis)	NA	NA	mannosyl (alpha-1,3-)-glycoprotein beta-1,4-N-acetylglucosaminyltransferase, isozyme B [Source:HGNC Symbol;Acc:HGNC:7048]	0	0	0	0.102938	-inf	-inf	1	1
chr8	+	66712734	66804447	ENST00000523401	processed_transcript	5	583	ENSG00000104205	SGK3	GO:0000166(nucleotide binding);GO:0004672(protein kinase activity);GO:0004674(protein serine/threonine kinase activity);GO:0005524(ATP binding);GO:0006468(protein phosphorylation);GO:0016740(transferase activity);GO:0016301(kinase activity);GO:0016310(phosphorylation);GO:0005515(protein binding);GO:0031410(cytoplasmic vesicle);GO:0035091(phosphatidylinositol binding);GO:0035556(intracellular sign…	04068(FoxO signaling pathway);04151(PI3K-Akt signaling pathway)	NA	NA	serum/glucocorticoid regulated kinase family member 3 [Source:HGNC Symbol;Acc:HGNC:10812]	0	0	0	0.027381	-inf	-inf	1	1
chr13	+	42138042	42229250	ENST00000628433	protein_coding	28	3449	ENSG00000102780	DGKH	GO:0005737(cytoplasm);GO:0016020(membrane);GO:0046872(metal ion binding);GO:0000166(nucleotide binding);GO:0005524(ATP binding);GO:0016740(transferase activity);GO:0016301(kinase activity);GO:0016310(phosphorylation);GO:0035556(intracellular signal transduction);GO:0008152(metabolic process);GO:0003951(NAD+ kinase activity);GO:0005886(plasma membrane);GO:0004143(diacylglycerol kinase activity);GO…	00561(Glycerolipid metabolism);00564(Glycerophospholipid metabolism);04070(Phosphatidylinositol signaling system);04072(Phospholipase D signaling pathway);05231(Choline metabolism in cancer)	K00901	EC:2.7.1.107	diacylglycerol kinase eta [Source:HGNC Symbol;Acc:HGNC:2854]	0	0	0	0.000675	-inf	-inf	1	1
chr12	+	57089147	57091816	ENST00000554718	processed_transcript	2	791	ENSG00000166886	NAB2	GO:0005634(nucleus);GO:0006351(transcription, DNA-templated);GO:0006355(regulation of transcription, DNA-templated);GO:0005515(protein binding);GO:0045892(negative regulation of transcription, DNA-templated);GO:0042802(identical protein binding);GO:0007399(nervous system development);GO:0003714(transcription corepressor activity);GO:0008283(cell proliferation);GO:1902949(positive regulation of ta…	NA	NA	NA	NGFI-A binding protein 2 [Source:HGNC Symbol;Acc:HGNC:7627]	0	0	0.967591	0.365566	-inf	-inf	1	1
chr12	-	49103701	49110693	ENST00000553204	processed_transcript	5	582	ENSG00000139636	LMBR1L	GO:0016020(membrane);GO:0016021(integral component of membrane);GO:0005886(plasma membrane);GO:0006897(endocytosis)	NA	NA	NA	limb development membrane protein 1 like [Source:HGNC Symbol;Acc:HGNC:18268]	0	0	0	0.455301	-inf	-inf	1	1
chr9	+	35341830	35405244	ENST00000637271	processed_transcript	30	5335	ENSG00000198722	UNC13B	GO:0005622(intracellular);GO:0046872(metal ion binding);GO:0035556(intracellular signal transduction);GO:0007268(chemical synaptic transmission);GO:0019992(diacylglycerol binding);GO:0043065(positive regulation of apoptotic process);GO:0005737(cytoplasm);GO:0016020(membrane);GO:0005794(Golgi apparatus);GO:0005829(cytosol);GO:0005886(plasma membrane);GO:0030054(cell junction);GO:0045202(synapse);G…	04721(Synaptic vesicle cycle)	NA	NA	unc-13 homolog B [Source:HGNC Symbol;Acc:HGNC:12566]	0	0	0	2.48531	-inf	-inf	1	1
chr5	+	60487713	60491518	ENST00000515734	lincRNA	2	2569	ENSG00000152931	PART1	NA	NA	NA	NA	prostate androgen-regulated transcript 1 (non-protein coding) [Source:HGNC Symbol;Acc:HGNC:17263]	0	0	0	0.009744	-inf	-inf	1	1
chr8	-	85337985	85378113	ENST00000520093	retained_intron	3	594	ENSG00000133742	CA1	GO:0005737(cytoplasm);GO:0008270(zinc ion binding);GO:0046872(metal ion binding);GO:0016829(lyase activity);GO:0006730(one-carbon metabolic process);GO:0005515(protein binding);GO:0004089(carbonate dehydratase activity);GO:0005829(cytosol);GO:0070062(extracellular exosome);GO:0035722(interleukin-12-mediated signaling pathway);GO:0015701(bicarbonate transport);GO:0004064(arylesterase activity);GO:…	00910(Nitrogen metabolism)	NA	NA	carbonic anhydrase 1 [Source:HGNC Symbol;Acc:HGNC:1368]	0	0	0	0.327549	-inf	-inf	1	1
chr3	+	37341649	37341766	ENST00000410276	rRNA	1	118	ENSG00000222208	RNA5SP129	NA	NA	NA	NA	RNA, 5S ribosomal pseudogene 129 [Source:HGNC Symbol;Acc:HGNC:43029]	0	0	0	0.067424	-inf	-inf	1	1
chr11	+	47248927	47268816	ENST00000532630	processed_transcript	4	549	ENSG00000025434	NR1H3	GO:0050728(negative regulation of inflammatory response);GO:0045944(positive regulation of transcription from RNA polymerase II promoter);GO:0042632(cholesterol homeostasis);GO:0071222(cellular response to lipopolysaccharide);GO:0005634(nucleus);GO:0008270(zinc ion binding);GO:0046872(metal ion binding);GO:0006355(regulation of transcription, DNA-templated);GO:0006351(transcription, DNA-templated…	03320(PPAR signaling pathway);04932(Non-alcoholic fatty liver disease (NAFLD));04931(Insulin resistance);05160(Hepatitis C)	NA	NA	nuclear receptor subfamily 1 group H member 3 [Source:HGNC Symbol;Acc:HGNC:7966]	0	0	0	0.184967	-inf	-inf	1	1
chr8	+	17748118	17748230	ENST00000390978	rRNA	1	113	ENSG00000212280	RNA5SP256	NA	NA	NA	NA	RNA, 5S ribosomal pseudogene 256 [Source:HGNC Symbol;Acc:HGNC:43156]	0	0	0.092408	0	-inf	-inf	1	1
chr5	-	175959883	176034680	ENST00000514861	protein_coding	4	628	ENSG00000051596	THOC3	GO:0003723(RNA binding);GO:0006397(mRNA processing);GO:0006810(transport);GO:0008380(RNA splicing);GO:0051028(mRNA transport);GO:0005634(nucleus);GO:0016607(nuclear speck);GO:0006406(mRNA export from nucleus);GO:0005654(nucleoplasm);GO:0000784(nuclear chromosome, telomeric region);GO:0006369(termination of RNA polymerase II transcription);GO:0006405(RNA export from nucleus);GO:0031124(mRNA 3'-end…	03040(Spliceosome);03013(RNA transport)	NA	NA	THO complex 3 [Source:HGNC Symbol;Acc:HGNC:19072]	0	0	0.309733	0.177847	-inf	-inf	1	1
chr21	+	45134726	45144682	ENST00000611195	protein_coding	2	159	ENSG00000197381	ADARB1	GO:0003723(RNA binding);GO:0006396(RNA processing);GO:0006397(mRNA processing);GO:0005634(nucleus);GO:0046872(metal ion binding);GO:0005829(cytosol);GO:0005654(nucleoplasm);GO:0016787(hydrolase activity);GO:0005515(protein binding);GO:0002376(immune system process);GO:0045087(innate immune response);GO:0005730(nucleolus);GO:0051607(defense response to virus);GO:0004000(adenosine deaminase activit…	NA	NA	NA	adenosine deaminase, RNA specific B1 [Source:HGNC Symbol;Acc:HGNC:226]	0	0	0.130004	0.035275	-inf	-inf	1	1
chr17	-	49400429	49400800	ENST00000462104	processed_pseudogene	1	372	ENSG00000186244	AC091180.1	NA	NA	NA	NA	NA	0	0	0	0.157535	-inf	-inf	1	1
chr12	+	95217811	95294184	ENST00000546398	processed_transcript	10	2075	ENSG00000028203	VEZT	GO:0005634(nucleus);GO:0016020(membrane);GO:0016021(integral component of membrane);GO:0005829(cytosol);GO:0005654(nucleoplasm);GO:0005886(plasma membrane);GO:0016337(single organismal cell-cell adhesion);GO:0030054(cell junction);GO:0031410(cytoplasmic vesicle);GO:0017022(myosin binding);GO:0005912(adherens junction);GO:0001669(acrosomal vesicle)	NA	NA	NA	vezatin, adherens junctions transmembrane protein [Source:HGNC Symbol;Acc:HGNC:18258]	0	0	0.009387	0	-inf	-inf	1	1
chr1	-	114716916	114750190	ENST00000438362	protein_coding	20	4167	ENSG00000009307	CSDE1	GO:0003676(nucleic acid binding);GO:0003723(RNA binding);GO:0005737(cytoplasm);GO:0005794(Golgi apparatus);GO:0005829(cytosol);GO:0006355(regulation of transcription, DNA-templated);GO:0003677(DNA binding);GO:0005886(plasma membrane);GO:0005515(protein binding);GO:0008584(male gonad development);GO:0070937(CRD-mediated mRNA stability complex);GO:0070966(nuclear-transcribed mRNA catabolic process,…	NA	NA	NA	cold shock domain containing E1 [Source:HGNC Symbol;Acc:HGNC:29905]	0	0	5.1e-05	0	-inf	-inf	1	1
chr22	+	45738474	45843671	ENST00000493643	processed_transcript	6	617	ENSG00000130638	ATXN10	GO:0005737(cytoplasm);GO:0016020(membrane);GO:0005829(cytosol);GO:0005886(plasma membrane);GO:0048471(perinuclear region of cytoplasm);GO:0005615(extracellular space);GO:0007399(nervous system development);GO:0030425(dendrite);GO:0005515(protein binding);GO:0031175(neuron projection development);GO:0043025(neuronal cell body);GO:0019899(enzyme binding);GO:0042802(identical protein binding);GO:006…	NA	NA	NA	ataxin 10 [Source:HGNC Symbol;Acc:HGNC:10549]	0	0	0.018226	0	-inf	-inf	1	1
chr8	-	41655324	41665274	ENST00000314214	protein_coding	5	1185	ENSG00000029534	ANK1	GO:0005737(cytoplasm);GO:0016020(membrane);GO:0007165(signal transduction);GO:0005886(plasma membrane);GO:0005856(cytoskeleton);GO:0005515(protein binding);GO:0006887(exocytosis);GO:0005829(cytosol);GO:0016529(sarcoplasmic reticulum);GO:0016323(basolateral plasma membrane);GO:0007010(cytoskeleton organization);GO:0031430(M band);GO:0019899(enzyme binding);GO:0005200(structural constituent of cyto…	05205(Proteoglycans in cancer)	K10380	NA	ankyrin 1 [Source:HGNC Symbol;Acc:HGNC:492]	0	0	0	0.019637	-inf	-inf	1	1
chr12	+	8095278	8097730	ENST00000640091	retained_intron	2	2115	ENSG00000089818	NECAP1	GO:0006810(transport);GO:0016020(membrane);GO:0015031(protein transport);GO:0006897(endocytosis);GO:0005886(plasma membrane);GO:0031410(cytoplasmic vesicle);GO:0005829(cytosol);GO:0061024(membrane organization);GO:0030665(clathrin-coated vesicle membrane);GO:0005905(clathrin-coated pit);GO:0030125(clathrin vesicle coat)	NA	NA	NA	NECAP endocytosis associated 1 [Source:HGNC Symbol;Acc:HGNC:24539]	0	0	0	0.359632	-inf	-inf	1	1
chr15	+	76995085	77037332	ENST00000558012	protein_coding	15	1896	ENSG00000140368	PSTPIP1	GO:0005737(cytoplasm);GO:0016020(membrane);GO:0007155(cell adhesion);GO:0005886(plasma membrane);GO:0005856(cytoskeleton);GO:0042995(cell projection);GO:0005515(protein binding);GO:0048471(perinuclear region of cytoplasm);GO:0002376(immune system process);GO:0045087(innate immune response);GO:0006954(inflammatory response);GO:0042802(identical protein binding);GO:0005829(cytosol);GO:0006897(endoc…	04621(NOD-like receptor signaling pathway)	K12804	NA	proline-serine-threonine phosphatase interacting protein 1 [Source:HGNC Symbol;Acc:HGNC:9580]	0	0	0	0.02328	-inf	-inf	1	1
chr12	-	10378575	10410128	ENST00000590323	nonsense_mediated_decay	12	1086	ENSG00000255819	KLRC4-KLRK1	GO:0016020(membrane);GO:0016021(integral component of membrane)	NA	NA	NA	KLRC4-KLRK1 readthrough [Source:HGNC Symbol;Acc:HGNC:48357]	0	0	0.097654	0.040481	-inf	-inf	1	1
chr8	-	144497362	144499305	ENST00000532766	antisense_RNA	3	821	ENSG00000255182	AC084125.2	NA	NA	NA	NA	NA	0	0	0.145586	0	-inf	-inf	1	1
chr10	-	33177494	33334905	ENST00000374867	protein_coding	17	5877	ENSG00000099250	NRP1	GO:0016020(membrane);GO:0016021(integral component of membrane);GO:0046872(metal ion binding);GO:0007411(axon guidance);GO:0007275(multicellular organism development);GO:0005021(vascular endothelial growth factor-activated receptor activity);GO:0017154(semaphorin receptor activity);GO:0001525(angiogenesis);GO:0007399(nervous system development);GO:0030154(cell differentiation);GO:0038084(vascular…	04360(Axon guidance);05166(HTLV-I infection)	K06724	NA	neuropilin 1 [Source:HGNC Symbol;Acc:HGNC:8004]	0	0	0.466745	0	-inf	-inf	1	1
chr6	+	13925193	13977367	ENST00000423553	protein_coding	2	633	ENSG00000180537	RNF182	GO:0005737(cytoplasm);GO:0016020(membrane);GO:0016021(integral component of membrane);GO:0046872(metal ion binding);GO:0016740(transferase activity);GO:0016567(protein ubiquitination);GO:0005515(protein binding);GO:0004842(ubiquitin-protein transferase activity)	NA	NA	NA	ring finger protein 182 [Source:HGNC Symbol;Acc:HGNC:28522]	0	0	0.002418	0	-inf	-inf	1	1
chr14	-	100334479	100375347	ENST00000557135	protein_coding	12	2080	ENSG00000140105	WARS	GO:0005634(nucleus);GO:0005737(cytoplasm);GO:0006412(translation);GO:0000166(nucleotide binding);GO:0005524(ATP binding);GO:0005829(cytosol);GO:0016874(ligase activity);GO:0005515(protein binding);GO:0004812(aminoacyl-tRNA ligase activity);GO:0004830(tryptophan-tRNA ligase activity);GO:0006418(tRNA aminoacylation for protein translation);GO:0006436(tryptophanyl-tRNA aminoacylation);GO:0070062(ext…	00970(Aminoacyl-tRNA biosynthesis)	K01867	EC:6.1.1.2	tryptophanyl-tRNA synthetase [Source:HGNC Symbol;Acc:HGNC:12729]	0	0	0	11.0184	-inf	-inf	1	1
chr13	-	94709622	94712399	ENST00000376945	protein_coding	1	2778	ENSG00000125285	SOX21	GO:0005634(nucleus);GO:0006355(regulation of transcription, DNA-templated);GO:0006366(transcription from RNA polymerase II promoter);GO:0006351(transcription, DNA-templated);GO:0003677(DNA binding);GO:0003700(transcription factor activity, sequence-specific DNA binding);GO:0005575(cellular_component);GO:0006357(regulation of transcription from RNA polymerase II promoter);GO:0048863(stem cell diff…	NA	NA	NA	SRY-box 21 [Source:HGNC Symbol;Acc:HGNC:11197]	0	0	0	0.015822	-inf	-inf	1	1
chr22	-	20063011	20066434	ENST00000608610	antisense_RNA	3	831	ENSG00000236540	AC006547.1	NA	NA	NA	NA	NA	0	0	1.63871	0.832119	-inf	-inf	1	1
chr19	+	57390005	57397164	ENST00000600442	nonsense_mediated_decay	5	535	ENSG00000188785	ZNF548	GO:0003676(nucleic acid binding);GO:0005634(nucleus);GO:0046872(metal ion binding);GO:0006355(regulation of transcription, DNA-templated);GO:0006351(transcription, DNA-templated);GO:0003677(DNA binding);GO:0005622(intracellular)	NA	NA	NA	zinc finger protein 548 [Source:HGNC Symbol;Acc:HGNC:26561]	0	0	0	0.157261	-inf	-inf	1	1
chr6	-	112121775	112129988	ENST00000604740	retained_intron	3	694	ENSG00000112769	LAMA4	GO:0007155(cell adhesion);GO:0005102(receptor binding);GO:0030334(regulation of cell migration);GO:0030155(regulation of cell adhesion);GO:0045995(regulation of embryonic development);GO:0001568(blood vessel development);GO:0050873(brown fat cell differentiation);GO:0005604(basement membrane);GO:0005605(basal lamina);GO:0005615(extracellular space);GO:0005515(protein binding);GO:0005576(extracell…	04151(PI3K-Akt signaling pathway);04512(ECM-receptor interaction);04510(Focal adhesion);05200(Pathways in cancer);05222(Small cell lung cancer);05165(Human papillomavirus infection);05146(Amoebiasis);05145(Toxoplasmosis);05143(African trypanosomiasis)	NA	NA	laminin subunit alpha 4 [Source:HGNC Symbol;Acc:HGNC:6484]	0	0	0	0.001759	-inf	-inf	1	1
chr10	+	104312141	104313881	ENST00000472915	antisense_RNA	2	244	ENSG00000270075	AL162742.2	NA	NA	NA	NA	NA	0	0	0.036254	0	-inf	-inf	1	1
chr4	-	79905571	80071620	ENST00000449651	nonsense_mediated_decay	18	2026	ENSG00000163297	ANTXR2	GO:0016020(membrane);GO:0016021(integral component of membrane);GO:0046872(metal ion binding);GO:0005783(endoplasmic reticulum);GO:0005789(endoplasmic reticulum membrane);GO:0005886(plasma membrane);GO:0005515(protein binding);GO:0005576(extracellular region);GO:0004872(receptor activity);GO:0010008(endosome membrane);GO:0022414(reproductive process);GO:1901998(toxin transport);GO:0009897(externa…	04621(NOD-like receptor signaling pathway)	NA	NA	anthrax toxin receptor 2 [Source:HGNC Symbol;Acc:HGNC:21732]	0	0	0	0.406574	-inf	-inf	1	1
chr2	+	148021451	148265070	ENST00000635796	processed_transcript	4	1371	ENSG00000204406	MBD5	GO:0005634(nucleus);GO:0005694(chromosome);GO:0030496(midbody);GO:0007399(nervous system development);GO:0005654(nucleoplasm);GO:0070062(extracellular exosome);GO:0016579(protein deubiquitination);GO:0003682(chromatin binding);GO:0042593(glucose homeostasis);GO:0040014(regulation of multicellular organism growth);GO:0010369(chromocenter);GO:0044708(single-organism behavior);GO:0060399(positive re…	NA	NA	NA	methyl-CpG binding domain protein 5 [Source:HGNC Symbol;Acc:HGNC:20444]	0	0	0	0.014437	-inf	-inf	1	1
chr12	-	121345924	121352395	ENST00000539871	protein_coding	5	704	ENSG00000089053	ANAPC5	GO:0005634(nucleus);GO:0016567(protein ubiquitination);GO:0051301(cell division);GO:0007049(cell cycle);GO:0005654(nucleoplasm);GO:0005829(cytosol);GO:0031145(anaphase-promoting complex-dependent catabolic process);GO:0043161(proteasome-mediated ubiquitin-dependent protein catabolic process);GO:0051437(positive regulation of ubiquitin-protein ligase activity involved in regulation of mitotic cell…	04120(Ubiquitin mediated proteolysis);04110(Cell cycle);04114(Oocyte meiosis);04657(IL-17 signaling pathway);04914(Progesterone-mediated oocyte maturation);05166(HTLV-I infection)	NA	NA	anaphase promoting complex subunit 5 [Source:HGNC Symbol;Acc:HGNC:15713]	0	0	0.001345	0	-inf	-inf	1	1
chr2	-	187380739	187448252	ENST00000447403	protein_coding	6	642	ENSG00000064989	CALCRL	GO:0016020(membrane);GO:0016021(integral component of membrane);GO:0015031(protein transport);GO:0004930(G-protein coupled receptor activity);GO:0007186(G-protein coupled receptor signaling pathway);GO:0005886(plasma membrane);GO:0005783(endoplasmic reticulum);GO:0005515(protein binding);GO:0004871(signal transducer activity);GO:0007165(signal transduction);GO:0006816(calcium ion transport);GO:00…	04080(Neuroactive ligand-receptor interaction);04270(Vascular smooth muscle contraction)	NA	NA	calcitonin receptor like receptor [Source:HGNC Symbol;Acc:HGNC:16709]	0	0	0.06401	0	-inf	-inf	1	1
chr9	-	127690348	127694959	ENST00000641641	protein_coding	2	510	ENSG00000187024	PTRH1	GO:0004045(aminoacyl-tRNA hydrolase activity);GO:0003723(RNA binding);GO:0016787(hydrolase activity);GO:0005515(protein binding);GO:0005739(mitochondrion)	NA	NA	NA	peptidyl-tRNA hydrolase 1 homolog [Source:HGNC Symbol;Acc:HGNC:27039]	0	0	0	0.053561	-inf	-inf	1	1
chr12	-	54182392	54188871	ENST00000504338	protein_coding	5	751	ENSG00000123415	SMUG1	GO:0005634(nucleus);GO:0016787(hydrolase activity);GO:0003677(DNA binding);GO:0005515(protein binding);GO:0006281(DNA repair);GO:0006974(cellular response to DNA damage stimulus);GO:0005654(nucleoplasm);GO:0045008(depyrimidination);GO:0005730(nucleolus);GO:0004844(uracil DNA N-glycosylase activity);GO:0006284(base-excision repair);GO:0000703(oxidized pyrimidine nucleobase lesion DNA N-glycosylase…	03410(Base excision repair)	NA	NA	single-strand-selective monofunctional uracil-DNA glycosylase 1 [Source:HGNC Symbol;Acc:HGNC:17148]	0	0	0	0.174525	-inf	-inf	1	1
chr20	+	35954564	35980581	ENST00000622112	protein_coding	5	559	ENSG00000149646	CNBD2	GO:0005737(cytoplasm);GO:0000166(nucleotide binding);GO:0005829(cytosol);GO:0030552(cAMP binding);GO:0007283(spermatogenesis)	NA	NA	NA	cyclic nucleotide binding domain containing 2 [Source:HGNC Symbol;Acc:HGNC:16145]	0	0	0	0.250383	-inf	-inf	1	1
chr7	+	102465001	102467376	ENST00000464107	nonsense_mediated_decay	5	646	ENSG00000161036	LRWD1	GO:0005634(nucleus);GO:0005737(cytoplasm);GO:0005730(nucleolus);GO:0005829(cytosol);GO:0005654(nucleoplasm);GO:0016569(covalent chromatin modification);GO:0005694(chromosome);GO:0005856(cytoskeleton);GO:0006260(DNA replication);GO:0005815(microtubule organizing center);GO:0000775(chromosome, centromeric region);GO:0000776(kinetochore);GO:0000777(condensed chromosome kinetochore);GO:0006325(chroma…	NA	NA	NA	leucine rich repeats and WD repeat domain containing 1 [Source:HGNC Symbol;Acc:HGNC:21769]	0	0	0	0.040375	-inf	-inf	1	1
chr2	-	175929969	175947510	ENST00000431754	nonsense_mediated_decay	4	539	ENSG00000144320	LNPK	GO:0016020(membrane);GO:0016021(integral component of membrane);GO:0046872(metal ion binding);GO:0005783(endoplasmic reticulum);GO:0005654(nucleoplasm);GO:0005789(endoplasmic reticulum membrane);GO:0007275(multicellular organism development);GO:0060173(limb development);GO:0071787(endoplasmic reticulum tubular network formation);GO:0071788(endoplasmic reticulum tubular network maintenance);GO:009…	NA	NA	NA	lunapark, ER junction formation factor [Source:HGNC Symbol;Acc:HGNC:21610]	0	0	0	5.59147	-inf	-inf	1	1
chr12	-	57028517	57050117	ENST00000300119	protein_coding	28	3621	ENSG00000166866	MYO1A	GO:0005737(cytoplasm);GO:0000166(nucleotide binding);GO:0005524(ATP binding);GO:0003774(motor activity);GO:0016459(myosin complex);GO:0003779(actin binding);GO:0005516(calmodulin binding);GO:0031941(filamentous actin);GO:0016323(basolateral plasma membrane);GO:0007605(sensory perception of sound);GO:0005902(microvillus);GO:0005903(brush border);GO:0016328(lateral plasma membrane);GO:0030864(corti…	NA	NA	NA	myosin IA [Source:HGNC Symbol;Acc:HGNC:7595]	0	0	0.007676	0.113735	-inf	-inf	1	1
chr18	-	62162263	62187038	ENST00000593225	processed_transcript	3	571	ENSG00000197563	PIGN	GO:0016020(membrane);GO:0016021(integral component of membrane);GO:0003824(catalytic activity);GO:0008152(metabolic process);GO:0005789(endoplasmic reticulum membrane);GO:0016740(transferase activity);GO:0006506(GPI anchor biosynthetic process);GO:0005829(cytosol);GO:0005886(plasma membrane);GO:0005783(endoplasmic reticulum);GO:0016254(preassembly of GPI anchor in ER membrane);GO:0016780(phosphot…	00563(Glycosylphosphatidylinositol(GPI)-anchor biosynthesis)	NA	NA	phosphatidylinositol glycan anchor biosynthesis class N [Source:HGNC Symbol;Acc:HGNC:8967]	0	0	0	0.044401	-inf	-inf	1	1
chr11	+	57598271	57614581	ENST00000531133	nonsense_mediated_decay	6	1004	ENSG00000149131	SERPING1	GO:0005615(extracellular space);GO:0004867(serine-type endopeptidase inhibitor activity);GO:0010951(negative regulation of endopeptidase activity);GO:0030193(regulation of blood coagulation);GO:0045916(negative regulation of complement activation);GO:0005515(protein binding);GO:0005576(extracellular region);GO:0002376(immune system process);GO:0045087(innate immune response);GO:0030449(regulation…	04610(Complement and coagulation cascades);05133(Pertussis)	NA	NA	serpin family G member 1 [Source:HGNC Symbol;Acc:HGNC:1228]	0	0	0	1.00951	-inf	-inf	1	1
chr17	-	8121804	8124092	ENST00000577735	protein_coding	5	654	ENSG00000179111	HES7	GO:0005634(nucleus);GO:0046983(protein dimerization activity);GO:0006355(regulation of transcription, DNA-templated);GO:0006351(transcription, DNA-templated);GO:0003677(DNA binding);GO:0000122(negative regulation of transcription from RNA polymerase II promoter);GO:0007275(multicellular organism development);GO:0007219(Notch signaling pathway);GO:0008134(transcription factor binding);GO:0007498(m…	05165(Human papillomavirus infection)	NA	NA	hes family bHLH transcription factor 7 [Source:HGNC Symbol;Acc:HGNC:15977]	0	0	0.027327	0.079394	-inf	-inf	1	1
chr8	+	42344960	42369988	ENST00000524208	nonsense_mediated_decay	9	653	ENSG00000070501	POLB	GO:0005634(nucleus);GO:0003677(DNA binding);GO:0071897(DNA biosynthetic process);GO:0034061(DNA polymerase activity);GO:0005737(cytoplasm);GO:0046872(metal ion binding);GO:0016740(transferase activity);GO:0016829(lyase activity);GO:0006281(DNA repair);GO:0005515(protein binding);GO:0006974(cellular response to DNA damage stimulus);GO:0016779(nucleotidyltransferase activity);GO:0003887(DNA-directe…	03410(Base excision repair);05203(Viral carcinogenesis);05166(HTLV-I infection)	NA	NA	DNA polymerase beta [Source:HGNC Symbol;Acc:HGNC:9174]	0	0	0	1.08629	-inf	-inf	1	1
chr4	-	175651913	176002356	ENST00000512509	protein_coding	5	566	ENSG00000150625	GPM6A	GO:0016020(membrane);GO:0016021(integral component of membrane);GO:0005886(plasma membrane);GO:0042995(cell projection);GO:0005515(protein binding);GO:0007399(nervous system development);GO:0070588(calcium ion transmembrane transport);GO:0030424(axon);GO:0048812(neuron projection morphogenesis);GO:0030175(filopodium);GO:0044295(axonal growth cone);GO:0070062(extracellular exosome);GO:0048863(stem…	NA	NA	NA	glycoprotein M6A [Source:HGNC Symbol;Acc:HGNC:4460]	0	0	0.028738	0	-inf	-inf	1	1
chr2	+	12716935	12742734	ENST00000381465	protein_coding	3	2778	ENSG00000071575	TRIB2	GO:0045599(negative regulation of fat cell differentiation);GO:0005737(cytoplasm);GO:0005856(cytoskeleton);GO:0004860(protein kinase inhibitor activity);GO:0005634(nucleus);GO:0006469(negative regulation of protein kinase activity);GO:0032436(positive regulation of proteasomal ubiquitin-dependent protein catabolic process);GO:0043405(regulation of MAP kinase activity);GO:0031625(ubiquitin protein…	NA	NA	NA	tribbles pseudokinase 2 [Source:HGNC Symbol;Acc:HGNC:30809]	0	0	0.347804	0	-inf	-inf	1	1
chrX	-	138632271	139204275	ENST00000441825	protein_coding	7	1625	ENSG00000129682	FGF13	GO:0005737(cytoplasm);GO:0005634(nucleus);GO:0005829(cytosol);GO:0008083(growth factor activity);GO:0005576(extracellular region);GO:0005886(plasma membrane);GO:0042995(cell projection);GO:0065009(regulation of molecular function);GO:0007399(nervous system development);GO:0005874(microtubule);GO:0005730(nucleolus);GO:0030425(dendrite);GO:0008017(microtubule binding);GO:0032147(activation of prote…	NA	NA	NA	fibroblast growth factor 13 [Source:HGNC Symbol;Acc:HGNC:3670]	0	0	0.055238	0	-inf	-inf	1	1
chr3	+	133768032	133770956	ENST00000462495	retained_intron	2	582	ENSG00000091513	TF	GO:0006810(transport);GO:0005615(extracellular space);GO:0046872(metal ion binding);GO:0005576(extracellular region);GO:0006811(ion transport);GO:0005515(protein binding);GO:0048471(perinuclear region of cytoplasm);GO:0031410(cytoplasmic vesicle);GO:0008199(ferric iron binding);GO:0006826(iron ion transport);GO:0006879(cellular iron ion homeostasis);GO:0005905(clathrin-coated pit);GO:0070062(extr…	04066(HIF-1 signaling pathway);04216(Ferroptosis);04978(Mineral absorption)	NA	NA	transferrin [Source:HGNC Symbol;Acc:HGNC:11740]	0	0	0.084251	0.089097	-inf	-inf	1	1
chr1	+	202567424	202580838	ENST00000465284	processed_transcript	4	564	ENSG00000077157	PPP1R12B	GO:0019901(protein kinase binding);GO:0005737(cytoplasm);GO:0043085(positive regulation of catalytic activity);GO:0005515(protein binding);GO:0005654(nucleoplasm);GO:0005829(cytosol);GO:0000086(G2/M transition of mitotic cell cycle);GO:0007165(signal transduction);GO:0030018(Z disc);GO:0031672(A band);GO:0008047(enzyme activator activity);GO:0006937(regulation of muscle contraction)	04510(Focal adhesion);04810(Regulation of actin cytoskeleton);04921(Oxytocin signaling pathway);04270(Vascular smooth muscle contraction);05205(Proteoglycans in cancer)	NA	NA	protein phosphatase 1 regulatory subunit 12B [Source:HGNC Symbol;Acc:HGNC:7619]	0	0	0	0.181569	-inf	-inf	1	1
chr12	-	123937714	123972616	ENST00000535556	protein_coding	5	555	ENSG00000119242	CCDC92	GO:0005737(cytoplasm);GO:0043231(intracellular membrane-bounded organelle);GO:0005654(nucleoplasm);GO:0005813(centrosome);GO:0005856(cytoskeleton);GO:0005515(protein binding);GO:0005814(centriole)	NA	NA	NA	coiled-coil domain containing 92 [Source:HGNC Symbol;Acc:HGNC:29563]	0	0	0	0.045863	-inf	-inf	1	1
chr10	+	79981839	79982212	ENST00000424200	processed_pseudogene	1	374	ENSG00000235924	ZNRF2P3	NA	NA	NA	NA	zinc and ring finger 2 pseudogene 3 [Source:HGNC Symbol;Acc:HGNC:45113]	0	0	0	0.020754	-inf	-inf	1	1
chr21	-	39028536	39029128	ENST00000440714	lincRNA	2	292	ENSG00000237609	AF064858.2	NA	NA	NA	NA	NA	0	0	0	0.123607	-inf	-inf	1	1
chr2	-	27311495	27323067	ENST00000403262	protein_coding	8	665	ENSG00000115204	MPV17	GO:0016020(membrane);GO:0016021(integral component of membrane);GO:0005743(mitochondrial inner membrane);GO:0005739(mitochondrion);GO:0005777(peroxisome);GO:0003674(molecular_function);GO:0034614(cellular response to reactive oxygen species);GO:0042592(homeostatic process);GO:2000377(regulation of reactive oxygen species metabolic process);GO:0000002(mitochondrial genome maintenance);GO:0032836(g…	04146(Peroxisome)	NA	NA	MPV17, mitochondrial inner membrane protein [Source:HGNC Symbol;Acc:HGNC:7224]	0	0	0	0.296669	-inf	-inf	1	1
chr7	+	149874043	149880695	ENST00000425642	protein_coding	4	1649	ENSG00000171130	ATP6V0E2	GO:0016020(membrane);GO:0016021(integral component of membrane);GO:0015078(hydrogen ion transmembrane transporter activity);GO:0015991(ATP hydrolysis coupled proton transport);GO:0033179(proton-transporting V-type ATPase, V0 domain);GO:0006810(transport);GO:0016787(hydrolase activity);GO:0006811(ion transport);GO:0015992(proton transport);GO:0034220(ion transmembrane transport);GO:0010008(endosom…	00190(Oxidative phosphorylation);04145(Phagosome);04966(Collecting duct acid secretion);04721(Synaptic vesicle cycle);05323(Rheumatoid arthritis);05110(Vibrio cholerae infection);05120(Epithelial cell signaling in Helicobacter pylori infection)	NA	NA	ATPase H+ transporting V0 subunit e2 [Source:HGNC Symbol;Acc:HGNC:21723]	0	0	1.99779	0	-inf	-inf	1	1
chr13	+	112985118	113024754	ENST00000433807	protein_coding	3	557	ENSG00000126217	MCF2L	GO:0005737(cytoplasm);GO:0016020(membrane);GO:0035556(intracellular signal transduction);GO:0005886(plasma membrane);GO:0005089(Rho guanyl-nucleotide exchange factor activity);GO:0035023(regulation of Rho protein signal transduction);GO:0043547(positive regulation of GTPase activity);GO:0005615(extracellular space);GO:0005085(guanyl-nucleotide exchange factor activity);GO:0008289(lipid binding);G…	NA	NA	NA	MCF.2 cell line derived transforming sequence like [Source:HGNC Symbol;Acc:HGNC:14576]	0	0	0.075709	0.019025	-inf	-inf	1	1
chr17	+	48590477	48606393	ENST00000467155	antisense_RNA	3	495	ENSG00000233101	HOXB-AS3	NA	NA	NA	NA	HOXB cluster antisense RNA 3 [Source:HGNC Symbol;Acc:HGNC:40283]	0	0	0.024341	0	-inf	-inf	1	1
chr11	-	7427266	7504872	ENST00000622955	antisense_RNA	8	2703	ENSG00000251364	AC107884.1	NA	NA	NA	NA	NA	0	0	0	0.008754	-inf	-inf	1	1
chr4	-	9553614	9553985	ENST00000463958	processed_pseudogene	1	372	ENSG00000242034	AC097493.1	NA	NA	NA	NA	NA	0	0	0.174899	0	-inf	-inf	1	1
chr12	+	6445352	6451718	ENST00000541233	processed_transcript	5	1045	ENSG00000139193	CD27	GO:0005622(intracellular);GO:0016020(membrane);GO:0016021(integral component of membrane);GO:0043066(negative regulation of apoptotic process);GO:0005515(protein binding);GO:0005576(extracellular region);GO:0006915(apoptotic process);GO:0004888(transmembrane signaling receptor activity);GO:0006955(immune response);GO:0005886(plasma membrane);GO:0005887(integral component of plasma membrane);GO:00…	04060(Cytokine-cytokine receptor interaction)	NA	NA	CD27 molecule [Source:HGNC Symbol;Acc:HGNC:11922]	0	0	0	0.481639	-inf	-inf	1	1
chr12	+	49366584	49494771	ENST00000550997	protein_coding	6	675	ENSG00000123352	SPATS2	GO:0003723(RNA binding);GO:0005737(cytoplasm);GO:0005829(cytosol)	NA	NA	NA	spermatogenesis associated serine rich 2 [Source:HGNC Symbol;Acc:HGNC:18650]	0	0	0.133034	0.180214	-inf	-inf	1	1
chr16	+	88663298	88687186	ENST00000563261	antisense_RNA	4	998	ENSG00000260630	SNAI3-AS1	NA	NA	NA	NA	SNAI3 antisense RNA 1 [Source:HGNC Symbol;Acc:HGNC:28327]	0	0	5e-06	0	-inf	-inf	1	1
chrX	-	137324972	137325049	ENST00000442158	processed_pseudogene	1	78	ENSG00000214748	AL355309.1	NA	NA	NA	NA	NA	0	0	0.136448	0	-inf	-inf	1	1
chr3	+	187702313	187733849	ENST00000449623	antisense_RNA	3	672	ENSG00000228804	AC072022.2	NA	NA	NA	NA	NA	0	0	0.149731	0	-inf	-inf	1	1
chr16	+	29351622	29361498	ENST00000509141	processed_transcript	4	578	ENSG00000271699	SNX29P2	NA	NA	NA	NA	sorting nexin 29 pseudogene 2 [Source:HGNC Symbol;Acc:HGNC:31914]	0	0	0	0.025453	-inf	-inf	1	1
chr3	+	39107743	39119669	ENST00000459702	retained_intron	5	2178	ENSG00000168026	TTC21A	GO:0005929(cilium);GO:0061512(protein localization to cilium);GO:0035721(intraciliary retrograde transport);GO:0030991(intraciliary transport particle A);GO:0005515(protein binding)	NA	NA	NA	tetratricopeptide repeat domain 21A [Source:HGNC Symbol;Acc:HGNC:30761]	0	0	0	0.016359	-inf	-inf	1	1
chr3	-	125107945	125120940	ENST00000465777	processed_transcript	5	561	ENSG00000221955	SLC12A8	GO:0006810(transport);GO:0016020(membrane);GO:0016021(integral component of membrane);GO:0055085(transmembrane transport);GO:0015293(symporter activity);GO:0006811(ion transport);GO:0006813(potassium ion transport);GO:0071805(potassium ion transmembrane transport);GO:1902476(chloride transmembrane transport);GO:0015379(potassium:chloride symporter activity);GO:0022820(potassium ion symporter acti…	NA	NA	NA	solute carrier family 12 member 8 [Source:HGNC Symbol;Acc:HGNC:15595]	0	0	0.153629	0	-inf	-inf	1	1
chr14	+	51724103	51724209	ENST00000384277	snRNA	1	107	ENSG00000207004	RNU6-301P	NA	NA	NA	NA	RNA, U6 small nuclear 301, pseudogene [Source:HGNC Symbol;Acc:HGNC:47264]	0	0	0.270249	0	-inf	-inf	1	1
chr20	+	63337339	63337449	ENST00000410507	snRNA	1	111	ENSG00000222439	RNU6-994P	NA	NA	NA	NA	RNA, U6 small nuclear 994, pseudogene [Source:HGNC Symbol;Acc:HGNC:47957]	0	0	0	0.068179	-inf	-inf	1	1
chr5	-	157095450	157107283	ENST00000521665	retained_intron	4	795	ENSG00000135077	HAVCR2	GO:0016020(membrane);GO:0016021(integral component of membrane);GO:0046872(metal ion binding);GO:0030054(cell junction);GO:0002376(immune system process);GO:0045087(innate immune response);GO:0006954(inflammatory response);GO:0002250(adaptive immune response);GO:0005515(protein binding);GO:0070062(extracellular exosome);GO:0032088(negative regulation of NF-kappaB transcription factor activity);GO…	NA	NA	NA	hepatitis A virus cellular receptor 2 [Source:HGNC Symbol;Acc:HGNC:18437]	0	0	0.074262	0	-inf	-inf	1	1
chr20	+	8306366	8628312	ENST00000636784	processed_transcript	3	100	ENSG00000182621	PLCB1	GO:0005634(nucleus);GO:0005737(cytoplasm);GO:0016787(hydrolase activity);GO:0035556(intracellular signal transduction);GO:0005509(calcium ion binding);GO:0007165(signal transduction);GO:0006629(lipid metabolic process);GO:0016042(lipid catabolic process);GO:0004871(signal transducer activity);GO:0008081(phosphoric diester hydrolase activity);GO:0051726(regulation of cell cycle);GO:0004435(phospha…	00562(Inositol phosphate metabolism);04015(Rap1 signaling pathway);04310(Wnt signaling pathway);04371(Apelin signaling pathway);04020(Calcium signaling pathway);04070(Phosphatidylinositol signaling system);04072(Phospholipase D signaling pathway);04071(Sphingolipid signaling pathway);04022(cGMP - PKG signaling pathway);04540(Gap junction);04611(Platelet activation);04621(NOD-like receptor signali…	NA	NA	phospholipase C beta 1 [Source:HGNC Symbol;Acc:HGNC:15917]	0	0	0.121327	0	-inf	-inf	1	1
chr15	+	99566483	99645739	ENST00000559903	protein_coding	4	574	ENSG00000068305	MEF2A	GO:0005634(nucleus);GO:0046983(protein dimerization activity);GO:0006351(transcription, DNA-templated);GO:0006355(regulation of transcription, DNA-templated);GO:0003677(DNA binding);GO:0000977(RNA polymerase II regulatory region sequence-specific DNA binding);GO:0045944(positive regulation of transcription from RNA polymerase II promoter);GO:0010613(positive regulation of cardiac muscle hypertrop…	04371(Apelin signaling pathway);04022(cGMP - PKG signaling pathway);05418(Fluid shear stress and atherosclerosis)	NA	NA	myocyte enhancer factor 2A [Source:HGNC Symbol;Acc:HGNC:6993]	0	0	0	0.442951	-inf	-inf	1	1
chr16	+	3305508	3317252	ENST00000571101	processed_transcript	5	598	ENSG00000162086	ZNF75A	GO:0003676(nucleic acid binding);GO:0005634(nucleus);GO:0046872(metal ion binding);GO:0006355(regulation of transcription, DNA-templated);GO:0006351(transcription, DNA-templated);GO:0003677(DNA binding);GO:0005622(intracellular);GO:0003674(molecular_function);GO:0008150(biological_process);GO:0003700(transcription factor activity, sequence-specific DNA binding)	NA	NA	NA	zinc finger protein 75a [Source:HGNC Symbol;Acc:HGNC:13146]	0	0	0.133516	0.081544	-inf	-inf	1	1
chr11	-	6395124	6405417	ENST00000618005	protein_coding	13	2107	ENSG00000166313	APBB1	GO:0005634(nucleus);GO:0005737(cytoplasm);GO:0016607(nuclear speck);GO:0016020(membrane);GO:0006351(transcription, DNA-templated);GO:0006355(regulation of transcription, DNA-templated);GO:0016569(covalent chromatin modification);GO:0005886(plasma membrane);GO:0042995(cell projection);GO:0005515(protein binding);GO:0007165(signal transduction);GO:0006974(cellular response to DNA damage stimulus);G…	05010(Alzheimer's disease)	NA	NA	amyloid beta precursor protein binding family B member 1 [Source:HGNC Symbol;Acc:HGNC:581]	0	0	0.004137	0.003161	-inf	-inf	1	1
chr5	+	55853322	55917337	ENST00000297015	protein_coding	15	2695	ENSG00000164509	IL31RA	GO:0005622(intracellular);GO:0016020(membrane);GO:0016021(integral component of membrane);GO:0005886(plasma membrane);GO:0042995(cell projection);GO:0030054(cell junction);GO:0045202(synapse);GO:0003713(transcription coactivator activity);GO:0045893(positive regulation of transcription, DNA-templated);GO:0002376(immune system process);GO:0006952(defense response);GO:0030424(axon);GO:0019901(prote…	NA	NA	NA	interleukin 31 receptor A [Source:HGNC Symbol;Acc:HGNC:18969]	0	0	0.004452	0.093928	-inf	-inf	1	1
chr5	+	147922179	147923421	ENST00000509352	processed_pseudogene	1	1243	ENSG00000250346	EEF1GP2	NA	NA	NA	NA	eukaryotic translation elongation factor 1 gamma pseudogene 2 [Source:HGNC Symbol;Acc:HGNC:44557]	0	0	0.002262	0.002186	-inf	-inf	1	1
chr14	+	24036501	24050901	ENST00000558622	processed_transcript	4	493	ENSG00000225766	DHRS4L1	NA	NA	NA	NA	dehydrogenase/reductase 4 like 1 [Source:HGNC Symbol;Acc:HGNC:19732]	0	0	0.018946	0	-inf	-inf	1	1
chr19	-	37739906	37773745	ENST00000489148	nonsense_mediated_decay	6	861	ENSG00000189144	ZNF573	GO:0003676(nucleic acid binding);GO:0005634(nucleus);GO:0046872(metal ion binding);GO:0006355(regulation of transcription, DNA-templated);GO:0006351(transcription, DNA-templated);GO:0003677(DNA binding);GO:0005622(intracellular);GO:0003700(transcription factor activity, sequence-specific DNA binding)	NA	NA	NA	zinc finger protein 573 [Source:HGNC Symbol;Acc:HGNC:26420]	0	0	0	0.058765	-inf	-inf	1	1
chr2	+	74319399	74319501	ENST00000516405	snRNA	1	103	ENSG00000252214	RNU6-542P	NA	NA	NA	NA	RNA, U6 small nuclear 542, pseudogene [Source:HGNC Symbol;Acc:HGNC:47505]	0	0	0.20081	0	-inf	-inf	1	1
chr19	-	55353597	55354719	ENST00000589467	protein_coding	4	479	ENSG00000160471	COX6B2	GO:0005739(mitochondrion);GO:0005515(protein binding);GO:0005758(mitochondrial intermembrane space);GO:0030061(mitochondrial crista)	00190(Oxidative phosphorylation);04260(Cardiac muscle contraction);05010(Alzheimer's disease);05012(Parkinson's disease);05016(Huntington's disease);04932(Non-alcoholic fatty liver disease (NAFLD))	NA	NA	cytochrome c oxidase subunit 6B2 [Source:HGNC Symbol;Acc:HGNC:24380]	0	0	0	0.024714	-inf	-inf	1	1
chr4	-	28823244	28824211	ENST00000503460	processed_pseudogene	1	968	ENSG00000250927	MESTP3	NA	NA	NA	NA	mesoderm specific transcript pseudogene 3 [Source:HGNC Symbol;Acc:HGNC:38553]	0	0	0	0.049515	-inf	-inf	1	1
chr7	+	43096732	43096844	ENST00000365063	misc_RNA	1	113	ENSG00000201933	Y_RNA	NA	NA	NA	NA	Y RNA [Source:RFAM;Acc:RF00019]	0	0	0	0.051517	-inf	-inf	1	1
chr4	+	20542619	20568918	ENST00000511508	protein_coding	10	767	ENSG00000145147	SLIT2	GO:0071672(negative regulation of smooth muscle cell chemotaxis);GO:0005737(cytoplasm);GO:0016020(membrane);GO:0005509(calcium ion binding);GO:0042803(protein homodimerization activity);GO:0005576(extracellular region);GO:0007275(multicellular organism development);GO:0005615(extracellular space);GO:0007399(nervous system development);GO:0030154(cell differentiation);GO:0006935(chemotaxis);GO:000…	04360(Axon guidance)	NA	NA	slit guidance ligand 2 [Source:HGNC Symbol;Acc:HGNC:11086]	0	0	0	0.004207	-inf	-inf	1	1
chr5	-	80111651	80256019	ENST00000512972	nonsense_mediated_decay	14	1627	ENSG00000164300	SERINC5	GO:0005737(cytoplasm);GO:0016020(membrane);GO:0016021(integral component of membrane);GO:0006629(lipid metabolic process);GO:0006665(sphingolipid metabolic process);GO:0005886(plasma membrane);GO:0008654(phospholipid biosynthetic process);GO:0048471(perinuclear region of cytoplasm);GO:0002376(immune system process);GO:0045087(innate immune response);GO:0051607(defense response to virus);GO:004255…	NA	NA	NA	serine incorporator 5 [Source:HGNC Symbol;Acc:HGNC:18825]	0	0	0.080456	0	-inf	-inf	1	1
chr5	-	177400107	177400636	ENST00000358571	protein_coding	1	530	ENSG00000196570	PFN3	GO:0005634(nucleus);GO:0005737(cytoplasm);GO:0003779(actin binding);GO:0030036(actin cytoskeleton organization);GO:0005856(cytoskeleton);GO:0008289(lipid binding);GO:0030833(regulation of actin filament polymerization);GO:0032233(positive regulation of actin filament bundle assembly)	04015(Rap1 signaling pathway);04810(Regulation of actin cytoskeleton);05132(Salmonella infection);05131(Shigellosis)	K05759	NA	profilin 3 [Source:HGNC Symbol;Acc:HGNC:18627]	0	0	0	0.04357	-inf	-inf	1	1
chr17	+	76557767	76558460	ENST00000586846	lincRNA	2	582	ENSG00000163597	SNHG16	NA	NA	NA	NA	small nucleolar RNA host gene 16 [Source:HGNC Symbol;Acc:HGNC:44352]	0	0	0	0.260173	-inf	-inf	1	1
chr6	-	27109790	27109980	ENST00000410868	snRNA	1	191	ENSG00000222800	RNU2-62P	NA	NA	NA	NA	RNA, U2 small nuclear 62, pseudogene [Source:HGNC Symbol;Acc:HGNC:48555]	0	0	0	0.097533	-inf	-inf	1	1
chr1	-	212225278	212234546	ENST00000443448	lincRNA	3	337	ENSG00000226251	AL451060.1	NA	NA	NA	NA	NA	0	0	0.673041	0.202686	-inf	-inf	1	1
chr11	-	58958217	58979285	ENST00000525714	antisense_RNA	3	894	ENSG00000255240	AP001636.3	NA	NA	NA	NA	NA	0	0	0	0.050612	-inf	-inf	1	1
chr12	+	45836761	45908040	ENST00000479608	processed_transcript	15	7761	ENSG00000189079	ARID2	GO:0008285(negative regulation of cell proliferation);GO:0030336(negative regulation of cell migration);GO:0003676(nucleic acid binding);GO:0005634(nucleus);GO:0046872(metal ion binding);GO:0005654(nucleoplasm);GO:0006355(regulation of transcription, DNA-templated);GO:0006351(transcription, DNA-templated);GO:0016569(covalent chromatin modification);GO:0003677(DNA binding);GO:0005886(plasma membra…	05225(Hepatocellular carcinoma)	NA	NA	AT-rich interaction domain 2 [Source:HGNC Symbol;Acc:HGNC:18037]	0	0	0.002148	0.001475	-inf	-inf	1	1
chr7	+	27200437	27201823	ENST00000605136	antisense_RNA	2	1286	ENSG00000243766	HOTTIP	NA	NA	NA	NA	HOXA distal transcript antisense RNA [Source:HGNC Symbol;Acc:HGNC:37461]	0	0	0	0.017283	-inf	-inf	1	1
chr5	-	43543061	43557077	ENST00000504075	protein_coding	3	501	ENSG00000172239	PAIP1	GO:0003723(RNA binding);GO:0005737(cytoplasm);GO:0005515(protein binding);GO:0045727(positive regulation of translation);GO:0005829(cytosol);GO:0000289(nuclear-transcribed mRNA poly(A) tail shortening);GO:0006417(regulation of translation);GO:0008494(translation activator activity);GO:0048255(mRNA stabilization);GO:0006413(translational initiation)	03013(RNA transport)	NA	NA	poly(A) binding protein interacting protein 1 [Source:HGNC Symbol;Acc:HGNC:16945]	0	0	0.079461	0	-inf	-inf	1	1
chr2	+	30447257	30644225	ENST00000309052	protein_coding	7	5060	ENSG00000172954	LCLAT1	GO:0016020(membrane);GO:0016021(integral component of membrane);GO:0016746(transferase activity, transferring acyl groups);GO:0008152(metabolic process);GO:0005783(endoplasmic reticulum);GO:0005829(cytosol);GO:0016740(transferase activity);GO:0006629(lipid metabolic process);GO:0005789(endoplasmic reticulum membrane);GO:0005515(protein binding);GO:0008654(phospholipid biosynthetic process);GO:000…	00561(Glycerolipid metabolism);00564(Glycerophospholipid metabolism)	K13513	EC:2.3.1.- 2.3.1.51	lysocardiolipin acyltransferase 1 [Source:HGNC Symbol;Acc:HGNC:26756]	0	0	3.87529	0	-inf	-inf	1	1
chr2	-	227630292	227642365	ENST00000641887	processed_transcript	3	598	ENSG00000042304	C2orf83	GO:0006810(transport);GO:0016020(membrane);GO:0015403(thiamine uptake transmembrane transporter activity);GO:0071934(thiamine transmembrane transport)	NA	NA	NA	chromosome 2 open reading frame 83 [Source:HGNC Symbol;Acc:HGNC:25344]	0	0	0.170436	0	-inf	-inf	1	1
chr6	+	160706375	160708317	ENST00000471691	retained_intron	2	786	ENSG00000122194	PLG	GO:0019904(protein domain specific binding);GO:0005102(receptor binding);GO:0005615(extracellular space);GO:0010812(negative regulation of cell-substrate adhesion);GO:0016787(hydrolase activity);GO:0005515(protein binding);GO:0008233(peptidase activity);GO:0006508(proteolysis);GO:0005576(extracellular region);GO:0004252(serine-type endopeptidase activity);GO:0008236(serine-type peptidase activity…	04080(Neuroactive ligand-receptor interaction);04610(Complement and coagulation cascades);05150(Staphylococcus aureus infection);05164(Influenza A)	NA	NA	plasminogen [Source:HGNC Symbol;Acc:HGNC:9071]	0	0	0.007483	0	-inf	-inf	1	1
chr7	+	7567053	7572667	ENST00000433056	protein_coding	4	844	ENSG00000164654	MIOS	GO:0016020(membrane);GO:0005765(lysosomal membrane);GO:0005764(lysosome);GO:0005515(protein binding);GO:0034198(cellular response to amino acid starvation);GO:0034629(cellular protein complex localization);GO:0032008(positive regulation of TOR signaling);GO:0061700(GATOR2 complex)	04150(mTOR signaling pathway)	NA	NA	meiosis regulator for oocyte development [Source:HGNC Symbol;Acc:HGNC:21905]	0	0	0	0.405208	-inf	-inf	1	1
chr15	-	37050828	37050930	ENST00000383949	misc_RNA	1	103	ENSG00000206676	Y_RNA	NA	NA	NA	NA	Y RNA [Source:RFAM;Acc:RF00019]	0	0	0.304139	0	-inf	-inf	1	1
chr11	-	71845196	71845245	ENST00000517093	rRNA	1	50	ENSG00000252902	RNA5SP342	NA	NA	NA	NA	RNA, 5S ribosomal pseudogene 342 [Source:HGNC Symbol;Acc:HGNC:43242]	0	0	0	0.139715	-inf	-inf	1	1
chr22	+	45518783	45533898	ENST00000451475	protein_coding	5	544	ENSG00000077942	FBLN1	GO:0005576(extracellular region);GO:0005509(calcium ion binding);GO:0005578(proteinaceous extracellular matrix);GO:0030198(extracellular matrix organization);GO:0010952(positive regulation of peptidase activity);GO:0016504(peptidase activator activity);GO:0005615(extracellular space);GO:0070062(extracellular exosome);GO:0001968(fibronectin binding);GO:0042802(identical protein binding);GO:0016032…	NA	NA	NA	fibulin 1 [Source:HGNC Symbol;Acc:HGNC:3600]	0	0	0.123334	0	-inf	-inf	1	1
chr2	+	107914948	107915286	ENST00000448535	processed_pseudogene	1	339	ENSG00000237745	AC009963.4	NA	NA	NA	NA	NA	0	0	0.131504	0	-inf	-inf	1	1
chr11	+	108223172	108229363	ENST00000640388	protein_coding	6	578	ENSG00000149311	ATM	GO:0004674(protein serine/threonine kinase activity);GO:0006468(protein phosphorylation);GO:0005634(nucleus);GO:0000166(nucleotide binding);GO:0005524(ATP binding);GO:0016740(transferase activity);GO:0016301(kinase activity);GO:0016310(phosphorylation);GO:0003677(DNA binding);GO:0005515(protein binding);GO:0006974(cellular response to DNA damage stimulus);GO:0007049(cell cycle);GO:0031410(cytopla…	03440(Homologous recombination);04064(NF-kappa B signaling pathway);04068(FoxO signaling pathway);04110(Cell cycle);04210(Apoptosis);04115(p53 signaling pathway);04218(Cellular senescence);05202(Transcriptional misregulation in cancers);05206(MicroRNAs in cancer);05166(HTLV-I infection);05165(Human papillomavirus infection);01524(Platinum drug resistance)	NA	NA	ATM serine/threonine kinase [Source:HGNC Symbol;Acc:HGNC:795]	0	0	0.125436	0	-inf	-inf	1	1
chr22	+	50092745	50096437	ENST00000623740	sense_overlapping	1	3693	ENSG00000280395	AL034546.1	NA	NA	NA	NA	NA	0	0	0.004785	0	-inf	-inf	1	1
chr13	-	63828847	63843441	ENST00000607822	processed_transcript	5	2539	ENSG00000219926	AL445238.1	NA	NA	NA	NA	NA	0	0	0	0.022928	-inf	-inf	1	1
chr9	-	88144851	88145850	ENST00000614041	processed_pseudogene	1	1000	ENSG00000276535	AL353726.1	NA	NA	NA	NA	NA	0	0	0.018876	0	-inf	-inf	1	1
chr8	-	55980240	55980540	ENST00000468562	misc_RNA	1	301	ENSG00000240905	RN7SL798P	NA	NA	NA	NA	RNA, 7SL, cytoplasmic 798, pseudogene [Source:HGNC Symbol;Acc:HGNC:46814]	0	0	0.16812	0.043838	-inf	-inf	1	1
chr12	-	111965592	112013165	ENST00000552839	processed_transcript	4	511	ENSG00000198270	TMEM116	GO:0016020(membrane);GO:0016021(integral component of membrane);GO:0003674(molecular_function);GO:0008150(biological_process);GO:0005575(cellular_component)	NA	NA	NA	transmembrane protein 116 [Source:HGNC Symbol;Acc:HGNC:25084]	0	0	0.040954	0	-inf	-inf	1	1
chr20	-	32447148	32474735	ENST00000616976	protein_coding	8	1376	ENSG00000197183	NOL4L	GO:0005829(cytosol);GO:0005654(nucleoplasm);GO:0005515(protein binding)	NA	NA	NA	nucleolar protein 4 like [Source:HGNC Symbol;Acc:HGNC:16106]	0	0	0	1.12679	-inf	-inf	1	1
chr2	+	61858137	61860298	ENST00000612715	unprocessed_pseudogene	2	2034	ENSG00000277498	AC107081.3	NA	NA	NA	NA	NA	0	0	0.029569	0	-inf	-inf	1	1
chr4	-	168686608	168686716	ENST00000383886	snRNA	1	109	ENSG00000206613	RNU6-1336P	NA	NA	NA	NA	RNA, U6 small nuclear 1336, pseudogene [Source:HGNC Symbol;Acc:HGNC:48299]	0	0	0	0.19761	-inf	-inf	1	1
chr12	-	110042281	110048565	ENST00000551185	protein_coding	3	496	ENSG00000174456	C12orf76	GO:0016020(membrane);GO:0016021(integral component of membrane);GO:0005524(ATP binding);GO:0005216(ion channel activity);GO:0006811(ion transport);GO:0005887(integral component of plasma membrane);GO:0098655(cation transmembrane transport);GO:0060079(excitatory postsynaptic potential);GO:0001614(purinergic nucleotide receptor activity);GO:0004931(extracellular ATP-gated cation channel activity);G…	NA	NA	NA	chromosome 12 open reading frame 76 [Source:HGNC Symbol;Acc:HGNC:33790]	0	0	0.487873	0	-inf	-inf	1	1
chr17	+	60986857	61015785	ENST00000590352	processed_transcript	3	586	ENSG00000141376	BCAS3	GO:0005730(nucleolus);GO:0005634(nucleus);GO:0005737(cytoplasm);GO:0006351(transcription, DNA-templated);GO:0006355(regulation of transcription, DNA-templated);GO:0005856(cytoskeleton);GO:0005515(protein binding);GO:0045944(positive regulation of transcription from RNA polymerase II promoter);GO:2000114(regulation of establishment of cell polarity);GO:0031252(cell leading edge);GO:0043547(positiv…	NA	NA	NA	BCAS3, microtubule associated cell migration factor [Source:HGNC Symbol;Acc:HGNC:14347]	0	0	0.128847	0	-inf	-inf	1	1
chr22	+	42091204	42124959	ENST00000595777	antisense_RNA	6	833	ENSG00000237037	NDUFA6-AS1	NA	NA	NA	NA	NDUFA6 antisense RNA 1 (head to head) [Source:HGNC Symbol;Acc:HGNC:45273]	0	0	0.305689	0	-inf	-inf	1	1
chr22	-	35298838	35299541	ENST00000609073	antisense_RNA	2	385	ENSG00000273176	AL008635.1	NA	NA	NA	NA	NA	0	0	0	0.191355	-inf	-inf	1	1
chr9	-	120865784	120868356	ENST00000478371	retained_intron	3	506	ENSG00000119403	PHF19	GO:0005634(nucleus);GO:0046872(metal ion binding);GO:0006351(transcription, DNA-templated);GO:0006355(regulation of transcription, DNA-templated);GO:0016569(covalent chromatin modification);GO:0005515(protein binding);GO:0005654(nucleoplasm);GO:0035098(ESC/E(Z) complex);GO:0035064(methylated histone binding);GO:0061087(positive regulation of histone H3-K27 methylation);GO:0045814(negative regulat…	NA	NA	NA	PHD finger protein 19 [Source:HGNC Symbol;Acc:HGNC:24566]	0	0	0	0.060251	-inf	-inf	1	1
chr10	-	50341332	50623977	ENST00000619438	protein_coding	8	1680	ENSG00000198964	SGMS1	GO:0016020(membrane);GO:0016021(integral component of membrane);GO:0002950(ceramide phosphoethanolamine synthase activity);GO:0033188(sphingomyelin synthase activity);GO:0006954(inflammatory response);GO:0010628(positive regulation of gene expression);GO:0016049(cell growth);GO:0046513(ceramide biosynthetic process);GO:0071222(cellular response to lipopolysaccharide);GO:0071356(cellular response …	00600(Sphingolipid metabolism);04071(Sphingolipid signaling pathway)	NA	NA	sphingomyelin synthase 1 [Source:HGNC Symbol;Acc:HGNC:29799]	0	0	1.39017	0	-inf	-inf	1	1
chr1	-	27660328	27662722	ENST00000440492	lincRNA	2	441	ENSG00000233975	AL445490.2	NA	NA	NA	NA	NA	0	0	0.260461	0	-inf	-inf	1	1
chr4	+	108004774	108035174	ENST00000626637	protein_coding	8	1774	ENSG00000138796	HADH	GO:0005654(nucleoplasm);GO:0016491(oxidoreductase activity);GO:0055114(oxidation-reduction process);GO:0005739(mitochondrion);GO:0003857(3-hydroxyacyl-CoA dehydrogenase activity);GO:0006631(fatty acid metabolic process);GO:0006629(lipid metabolic process);GO:0070403(NAD+ binding);GO:0005759(mitochondrial matrix);GO:0005737(cytoplasm);GO:0006635(fatty acid beta-oxidation);GO:0009725(response to ho…	00650(Butanoate metabolism);00062(Fatty acid elongation);00071(Fatty acid degradation);00280(Valine, leucine and isoleucine degradation);00310(Lysine degradation);00380(Tryptophan metabolism)	K00022	EC:1.1.1.35	hydroxyacyl-CoA dehydrogenase [Source:HGNC Symbol;Acc:HGNC:4799]	0	0	0	0.860788	-inf	-inf	1	1
chr4	+	2462220	2497012	ENST00000503659	protein_coding	3	558	ENSG00000063978	RNF4	GO:0005634(nucleus);GO:0005737(cytoplasm);GO:0046872(metal ion binding);GO:0016740(transferase activity);GO:0006351(transcription, DNA-templated);GO:0006355(regulation of transcription, DNA-templated);GO:0016567(protein ubiquitination);GO:0003677(DNA binding);GO:0005515(protein binding);GO:0003713(transcription coactivator activity);GO:0045893(positive regulation of transcription, DNA-templated);…	NA	NA	NA	ring finger protein 4 [Source:HGNC Symbol;Acc:HGNC:10067]	0	0	0.046206	0	-inf	-inf	1	1
chr2	+	24971442	25035750	ENST00000451291	antisense_RNA	5	488	ENSG00000224165	DNAJC27-AS1	NA	NA	NA	NA	DNAJC27 antisense RNA 1 [Source:HGNC Symbol;Acc:HGNC:42943]	0	0	0.011641	0	-inf	-inf	1	1
chr11	+	119380742	119381581	ENST00000528510	antisense_RNA	2	209	ENSG00000254740	AP003396.3	NA	NA	NA	NA	NA	0	0	0	0.000236	-inf	-inf	1	1
chr15	-	38490554	38564635	ENST00000450598	protein_coding	16	2296	ENSG00000172575	RASGRP1	GO:0005737(cytoplasm);GO:0016020(membrane);GO:0007264(small GTPase mediated signal transduction);GO:0046872(metal ion binding);GO:0005829(cytosol);GO:0035556(intracellular signal transduction);GO:0005509(calcium ion binding);GO:0005794(Golgi apparatus);GO:0005886(plasma membrane);GO:0005783(endoplasmic reticulum);GO:0005789(endoplasmic reticulum membrane);GO:0008270(zinc ion binding);GO:0042803(p…	04014(Ras signaling pathway);04010(MAPK signaling pathway);04611(Platelet activation);04660(T cell receptor signaling pathway);05200(Pathways in cancer)	K04350	NA	RAS guanyl releasing protein 1 [Source:HGNC Symbol;Acc:HGNC:9878]	0	0	0.136134	0	-inf	-inf	1	1
chr3	+	136026957	136087886	ENST00000447251	nonsense_mediated_decay	8	806	ENSG00000073711	PPP2R3A	GO:0046872(metal ion binding);GO:0005509(calcium ion binding);GO:0050790(regulation of catalytic activity);GO:0005515(protein binding);GO:0000159(protein phosphatase type 2A complex);GO:0006470(protein dephosphorylation);GO:0061053(somite development);GO:0019888(protein phosphatase regulator activity)	03015(mRNA surveillance pathway);04071(Sphingolipid signaling pathway);04151(PI3K-Akt signaling pathway);04152(AMPK signaling pathway);04261(Adrenergic signaling in cardiomyocytes);04728(Dopaminergic synapse);05165(Human papillomavirus infection)	NA	NA	protein phosphatase 2 regulatory subunit B''alpha [Source:HGNC Symbol;Acc:HGNC:9307]	0	0	0.010323	0.047872	-inf	-inf	1	1
chr15	+	99565928	99713324	ENST00000558812	protein_coding	10	2186	ENSG00000068305	MEF2A	GO:0005634(nucleus);GO:0046983(protein dimerization activity);GO:0006351(transcription, DNA-templated);GO:0006355(regulation of transcription, DNA-templated);GO:0003677(DNA binding);GO:0000977(RNA polymerase II regulatory region sequence-specific DNA binding);GO:0045944(positive regulation of transcription from RNA polymerase II promoter);GO:0010613(positive regulation of cardiac muscle hypertrop…	04371(Apelin signaling pathway);04022(cGMP - PKG signaling pathway);05418(Fluid shear stress and atherosclerosis)	K09260	NA	myocyte enhancer factor 2A [Source:HGNC Symbol;Acc:HGNC:6993]	0	0	0.575619	0.064139	-inf	-inf	1	1
chr15	+	66293832	66308844	ENST00000532580	protein_coding	4	504	ENSG00000166938	DIS3L	GO:0003723(RNA binding);GO:0005737(cytoplasm);GO:0005829(cytosol);GO:0016787(hydrolase activity);GO:0005886(plasma membrane);GO:0005813(centrosome);GO:0005515(protein binding);GO:0004527(exonuclease activity);GO:0004518(nuclease activity);GO:0000175(3'-5'-exoribonuclease activity);GO:0016075(rRNA catabolic process);GO:0090503(RNA phosphodiester bond hydrolysis, exonucleolytic);GO:0000177(cytoplas…	03018(RNA degradation)	NA	NA	DIS3 like exosome 3'-5' exoribonuclease [Source:HGNC Symbol;Acc:HGNC:28698]	0	0	0	0.026472	-inf	-inf	1	1
chr10	+	6583861	6613903	ENST00000625147	retained_intron	6	757	ENSG00000237943	PRKCQ-AS1	NA	NA	NA	NA	PRKCQ antisense RNA 1 [Source:HGNC Symbol;Acc:HGNC:44689]	0	0	0.028384	0	-inf	-inf	1	1
chr16	+	88638593	88640473	ENST00000244241	protein_coding	3	1044	ENSG00000124391	IL17C	GO:0005576(extracellular region);GO:0006954(inflammatory response);GO:0005125(cytokine activity);GO:0005615(extracellular space);GO:0007267(cell-cell signaling);GO:0007166(cell surface receptor signaling pathway);GO:0097398(cellular response to interleukin-17)	04060(Cytokine-cytokine receptor interaction);04657(IL-17 signaling pathway)	K05491	NA	interleukin 17C [Source:HGNC Symbol;Acc:HGNC:5983]	0	0	0.10406	0	-inf	-inf	1	1
chr4	-	89726053	89837139	ENST00000394986	protein_coding	6	1420	ENSG00000145335	SNCA	GO:0006919(activation of cysteine-type endopeptidase activity involved in apoptotic process);GO:0043065(positive regulation of apoptotic process);GO:0005634(nucleus);GO:0005737(cytoplasm);GO:0016020(membrane);GO:0046872(metal ion binding);GO:0016491(oxidoreductase activity);GO:0055114(oxidation-reduction process);GO:0005829(cytosol);GO:0008270(zinc ion binding);GO:0005886(plasma membrane);GO:0005…	05010(Alzheimer's disease);05012(Parkinson's disease)	K04528	NA	synuclein alpha [Source:HGNC Symbol;Acc:HGNC:11138]	0	0	0	0.177217	-inf	-inf	1	1
chr8	-	145005561	145005906	ENST00000525753	processed_pseudogene	1	346	ENSG00000255530	AF235103.2	NA	NA	NA	NA	NA	0	0	0	0.055523	-inf	-inf	1	1
chr2	+	64644612	64646698	ENST00000439964	lincRNA	2	627	ENSG00000226756	AC007365.1	NA	NA	NA	NA	NA	0	0	0.291177	0.247905	-inf	-inf	1	1
chr11	-	16854894	17013342	ENST00000529213	processed_transcript	4	561	ENSG00000166689	PLEKHA7	GO:0005634(nucleus);GO:0005829(cytosol);GO:0030054(cell junction);GO:0005737(cytoplasm);GO:0005856(cytoskeleton);GO:0005813(centrosome);GO:0005815(microtubule organizing center);GO:0070062(extracellular exosome);GO:0005912(adherens junction);GO:0070097(delta-catenin binding);GO:0090136(epithelial cell-cell adhesion);GO:0045218(zonula adherens maintenance);GO:0005915(zonula adherens)	NA	NA	NA	pleckstrin homology domain containing A7 [Source:HGNC Symbol;Acc:HGNC:27049]	0	0	0	0.014525	-inf	-inf	1	1
chr6	-	31664210	31665185	ENST00000456540	protein_coding	3	627	ENSG00000204438	GPANK1	GO:0003676(nucleic acid binding);GO:0005515(protein binding)	NA	NA	NA	G-patch domain and ankyrin repeats 1 [Source:HGNC Symbol;Acc:HGNC:13920]	0	0	1.02713	0.475168	-inf	-inf	1	1
chr2	-	74532438	74553935	ENST00000264094	protein_coding	14	3502	ENSG00000115318	LOXL3	GO:0005634(nucleus);GO:0005737(cytoplasm);GO:0016020(membrane);GO:0046872(metal ion binding);GO:0016491(oxidoreductase activity);GO:0055114(oxidation-reduction process);GO:0005576(extracellular region);GO:0005044(scavenger receptor activity);GO:0006898(receptor-mediated endocytosis);GO:0005615(extracellular space);GO:0006954(inflammatory response);GO:0005507(copper ion binding);GO:0005515(protein…	NA	NA	NA	lysyl oxidase like 3 [Source:HGNC Symbol;Acc:HGNC:13869]	0	0	0.18422	0	-inf	-inf	1	1
chr1	+	61816419	61816522	ENST00000363705	snRNA	1	104	ENSG00000200575	RNU6-414P	NA	NA	NA	NA	RNA, U6 small nuclear 414, pseudogene [Source:HGNC Symbol;Acc:HGNC:47377]	0	0	0	0.145537	-inf	-inf	1	1
chr1	+	155058753	155061446	ENST00000462116	processed_transcript	6	429	ENSG00000143537	ADAM15	GO:0016020(membrane);GO:0016021(integral component of membrane);GO:0046872(metal ion binding);GO:0016787(hydrolase activity);GO:0007155(cell adhesion);GO:0042995(cell projection);GO:0005515(protein binding);GO:0008233(peptidase activity);GO:0006508(proteolysis);GO:0030054(cell junction);GO:0004222(metalloendopeptidase activity);GO:0008237(metallopeptidase activity);GO:0031410(cytoplasmic vesicle)…	NA	NA	NA	ADAM metallopeptidase domain 15 [Source:HGNC Symbol;Acc:HGNC:193]	0	0	0	0.050562	-inf	-inf	1	1
chr3	+	196228621	196230063	ENST00000471430	retained_intron	2	449	ENSG00000163959	SLC51A	GO:0006810(transport);GO:0016020(membrane);GO:0016021(integral component of membrane);GO:0005783(endoplasmic reticulum);GO:0005789(endoplasmic reticulum membrane);GO:0042803(protein homodimerization activity);GO:0005886(plasma membrane);GO:0043234(protein complex);GO:0046982(protein heterodimerization activity);GO:0015721(bile acid and bile salt transport);GO:0005215(transporter activity)	04976(Bile secretion)	NA	NA	solute carrier family 51 alpha subunit [Source:HGNC Symbol;Acc:HGNC:29955]	0	0	0.61421	0.224314	-inf	-inf	1	1
chr4	-	68053198	68129880	ENST00000356291	protein_coding	10	2088	ENSG00000198092	TMPRSS11F	GO:0016020(membrane);GO:0016021(integral component of membrane);GO:0016787(hydrolase activity);GO:0005887(integral component of plasma membrane);GO:0005576(extracellular region);GO:0008233(peptidase activity);GO:0006508(proteolysis);GO:0004252(serine-type endopeptidase activity);GO:0008236(serine-type peptidase activity)	NA	NA	NA	transmembrane protease, serine 11F [Source:HGNC Symbol;Acc:HGNC:29994]	0	0	0.023947	0	-inf	-inf	1	1
chr8	-	117523271	117524061	ENST00000483812	unprocessed_pseudogene	2	496	ENSG00000239917	RPS10P16	NA	NA	NA	NA	ribosomal protein S10 pseudogene 16 [Source:HGNC Symbol;Acc:HGNC:36200]	0	0	0.07628	0.102893	-inf	-inf	1	1
chr2	-	25008845	25008946	ENST00000384341	misc_RNA	1	102	ENSG00000207069	Y_RNA	NA	NA	NA	NA	Y RNA [Source:RFAM;Acc:RF00019]	0	0	0	0.147439	-inf	-inf	1	1
chr1	-	197642773	197775633	ENST00000422998	protein_coding	8	583	ENSG00000213047	DENND1B	GO:0006810(transport);GO:0005737(cytoplasm);GO:0016607(nuclear speck);GO:0015031(protein transport);GO:0005829(cytosol);GO:0031410(cytoplasmic vesicle);GO:0005085(guanyl-nucleotide exchange factor activity);GO:0017112(Rab guanyl-nucleotide exchange factor activity);GO:0061024(membrane organization);GO:0030136(clathrin-coated vesicle);GO:0050852(T cell receptor signaling pathway);GO:0032456(endocy…	NA	NA	NA	DENN domain containing 1B [Source:HGNC Symbol;Acc:HGNC:28404]	0	0	0.094469	0	-inf	-inf	1	1
chr7	+	983199	989640	ENST00000308919	protein_coding	9	2304	ENSG00000073067	CYP2W1	GO:0016020(membrane);GO:0046872(metal ion binding);GO:0004497(monooxygenase activity);GO:0016491(oxidoreductase activity);GO:0055114(oxidation-reduction process);GO:0005783(endoplasmic reticulum);GO:0005886(plasma membrane);GO:0005506(iron ion binding);GO:0016705(oxidoreductase activity, acting on paired donors, with incorporation or reduction of molecular oxygen);GO:0020037(heme binding);GO:0008…	NA	NA	NA	cytochrome P450 family 2 subfamily W member 1 [Source:HGNC Symbol;Acc:HGNC:20243]	0	0	0.0205	0	-inf	-inf	1	1
chr2	-	48686775	48755693	ENST00000294954	protein_coding	11	3044	ENSG00000138039	LHCGR	GO:0016020(membrane);GO:0016021(integral component of membrane);GO:0004930(G-protein coupled receptor activity);GO:0007186(G-protein coupled receptor signaling pathway);GO:0005886(plasma membrane);GO:0004871(signal transducer activity);GO:0007165(signal transduction);GO:0016500(protein-hormone receptor activity);GO:0005887(integral component of plasma membrane);GO:0009755(hormone-mediated signali…	04020(Calcium signaling pathway);04080(Neuroactive ligand-receptor interaction);04913(Ovarian Steroidogenesis);04917(Prolactin signaling pathway)	K04248	NA	luteinizing hormone/choriogonadotropin receptor [Source:HGNC Symbol;Acc:HGNC:6585]	0	0	0	0.008478	-inf	-inf	1	1
chr17	-	39126939	39153050	ENST00000583285	processed_transcript	4	528	ENSG00000161381	PLXDC1	GO:0005737(cytoplasm);GO:0016020(membrane);GO:0016021(integral component of membrane);GO:0005886(plasma membrane);GO:0005576(extracellular region);GO:0030054(cell junction);GO:0001525(angiogenesis);GO:0005923(bicellular tight junction);GO:0005515(protein binding);GO:0043235(receptor complex);GO:0021510(spinal cord development);GO:0030425(dendrite);GO:0043025(neuronal cell body)	NA	NA	NA	plexin domain containing 1 [Source:HGNC Symbol;Acc:HGNC:20945]	0	0	0	0.008827	-inf	-inf	1	1
chrX	+	1636398	1643081	ENST00000432523	protein_coding	2	442	ENSG00000196433	ASMT	GO:0008168(methyltransferase activity);GO:0016740(transferase activity);GO:0032259(methylation);GO:0042803(protein homodimerization activity);GO:0008171(O-methyltransferase activity);GO:0008757(S-adenosylmethionine-dependent methyltransferase activity);GO:0017096(acetylserotonin O-methyltransferase activity);GO:0030187(melatonin biosynthetic process);GO:0042802(identical protein binding);GO:00058…	00380(Tryptophan metabolism)	NA	NA	acetylserotonin O-methyltransferase [Source:HGNC Symbol;Acc:HGNC:750]	0	0	0.054973	0	-inf	-inf	1	1
chr5	+	122843439	122998314	ENST00000513613	processed_transcript	5	551	ENSG00000064652	SNX24	GO:0006810(transport);GO:0016020(membrane);GO:0015031(protein transport);GO:0030659(cytoplasmic vesicle membrane);GO:0031410(cytoplasmic vesicle);GO:0035091(phosphatidylinositol binding);GO:0008289(lipid binding);GO:0010314(phosphatidylinositol-5-phosphate binding);GO:0032266(phosphatidylinositol-3-phosphate binding);GO:0070273(phosphatidylinositol-4-phosphate binding)	NA	NA	NA	sorting nexin 24 [Source:HGNC Symbol;Acc:HGNC:21533]	0	0	0.079128	0.127421	-inf	-inf	1	1
chr11	-	33763206	33772003	ENST00000526952	processed_transcript	5	534	ENSG00000110429	FBXO3	GO:0005829(cytosol);GO:0005654(nucleoplasm);GO:0005634(nucleus);GO:0016567(protein ubiquitination);GO:0005515(protein binding);GO:0004842(ubiquitin-protein transferase activity);GO:0006508(proteolysis)	NA	NA	NA	F-box protein 3 [Source:HGNC Symbol;Acc:HGNC:13582]	0	0	0	0.010175	-inf	-inf	1	1
chr10	-	95311773	95561378	ENST00000371249	protein_coding	25	5927	ENSG00000095637	SORBS1	GO:0046326(positive regulation of glucose import);GO:0006810(transport);GO:0005634(nucleus);GO:0005737(cytoplasm);GO:0016020(membrane);GO:0007015(actin filament organization);GO:0009967(positive regulation of signal transduction);GO:0005886(plasma membrane);GO:0005925(focal adhesion);GO:0005813(centrosome);GO:0005856(cytoskeleton);GO:0005515(protein binding);GO:0030054(cell junction);GO:0045121(m…	04520(Adherens junction);04910(Insulin signaling pathway);03320(PPAR signaling pathway)	K06086	NA	sorbin and SH3 domain containing 1 [Source:HGNC Symbol;Acc:HGNC:14565]	0	0	0.106928	0.075944	-inf	-inf	1	1
chr2	+	131218351	131263591	ENST00000358087	nonsense_mediated_decay	14	2147	ENSG00000188219	POTEE	GO:0005615(extracellular space);GO:0003674(molecular_function);GO:0070062(extracellular exosome);GO:0001895(retina homeostasis);GO:0072562(blood microparticle);GO:0021762(substantia nigra development)	NA	NA	NA	POTE ankyrin domain family member E [Source:HGNC Symbol;Acc:HGNC:33895]	0	0	0.031208	0.236937	-inf	-inf	1	1
chr11	+	112961402	113278436	ENST00000316851	protein_coding	20	5837	ENSG00000149294	NCAM1	GO:0016020(membrane);GO:0016021(integral component of membrane);GO:0005829(cytosol);GO:0007155(cell adhesion);GO:0005886(plasma membrane);GO:0043547(positive regulation of GTPase activity);GO:0005576(extracellular region);GO:0031225(anchored component of membrane);GO:0046718(viral entry into host cell);GO:0070062(extracellular exosome);GO:0000165(MAPK cascade);GO:0016032(viral process);GO:0009986…	04514(Cell adhesion molecules (CAMs));05020(Prion diseases)	K06491	NA	neural cell adhesion molecule 1 [Source:HGNC Symbol;Acc:HGNC:7656]	0	0	0.238732	0	-inf	-inf	1	1
chr12	+	69470349	69570372	ENST00000547219	protein_coding	7	611	ENSG00000166225	FRS2	GO:2000726(negative regulation of cardiac muscle cell differentiation);GO:0016020(membrane);GO:0043547(positive regulation of GTPase activity);GO:0007186(G-protein coupled receptor signaling pathway);GO:0005158(insulin receptor binding);GO:0036092(phosphatidylinositol-3-phosphate biosynthetic process);GO:0005886(plasma membrane);GO:0046854(phosphatidylinositol phosphorylation);GO:0005887(integral…	04722(Neurotrophin signaling pathway);05205(Proteoglycans in cancer)	NA	NA	fibroblast growth factor receptor substrate 2 [Source:HGNC Symbol;Acc:HGNC:16971]	0	0	0	0.127317	-inf	-inf	1	1
chr4	+	188002708	188005045	ENST00000618147	protein_coding	1	2338	ENSG00000179059	ZFP42	GO:0003676(nucleic acid binding);GO:0005634(nucleus);GO:0005737(cytoplasm);GO:0046872(metal ion binding);GO:0006351(transcription, DNA-templated);GO:0006355(regulation of transcription, DNA-templated);GO:0003677(DNA binding);GO:0003700(transcription factor activity, sequence-specific DNA binding);GO:0051321(meiotic cell cycle);GO:0008584(male gonad development);GO:0008585(female gonad development)	NA	NA	NA	ZFP42 zinc finger protein [Source:HGNC Symbol;Acc:HGNC:30949]	0	0	0.035644	0.010292	-inf	-inf	1	1
chr18	-	47130244	47150476	ENST00000587388	protein_coding	5	566	ENSG00000167220	HDHD2	GO:0046872(metal ion binding);GO:0005515(protein binding);GO:0008150(biological_process);GO:0070062(extracellular exosome);GO:0019899(enzyme binding);GO:0016791(phosphatase activity);GO:0016311(dephosphorylation)	NA	NA	NA	haloacid dehalogenase like hydrolase domain containing 2 [Source:HGNC Symbol;Acc:HGNC:25364]	0	0	0.015613	0.260962	-inf	-inf	1	1
chr4	+	183037665	183040119	ENST00000502308	processed_transcript	1	2455	ENSG00000230219	FAM92A1P2	NA	NA	NA	NA	family with sequence similarity 92 member A1 pseudogene 2 [Source:HGNC Symbol;Acc:HGNC:32287]	0	0	0	0.011935	-inf	-inf	1	1
chr6	+	31920096	31935990	ENST00000484636	nonsense_mediated_decay	5	542	ENSG00000166278	C2	GO:0016787(hydrolase activity);GO:0008233(peptidase activity);GO:0006508(proteolysis);GO:0004252(serine-type endopeptidase activity);GO:0008236(serine-type peptidase activity);GO:0046872(metal ion binding);GO:0005576(extracellular region);GO:0005515(protein binding);GO:0002376(immune system process);GO:0045087(innate immune response);GO:0006956(complement activation);GO:0030449(regulation of comp…	04610(Complement and coagulation cascades);05322(Systemic lupus erythematosus);05133(Pertussis);05150(Staphylococcus aureus infection)	NA	NA	complement C2 [Source:HGNC Symbol;Acc:HGNC:1248]	0	0	0	0.169554	-inf	-inf	1	1
chr11	+	124115404	124124841	ENST00000449321	protein_coding	11	1978	ENSG00000110002	VWA5A	NA	NA	NA	NA	von Willebrand factor A domain containing 5A [Source:HGNC Symbol;Acc:HGNC:6658]	0	0	0	0.000342	-inf	-inf	1	1
chr17	-	60231516	60231646	ENST00000516768	scaRNA	1	131	ENSG00000252577	SCARNA20	NA	NA	NA	NA	small Cajal body-specific RNA 20 [Source:HGNC Symbol;Acc:HGNC:32578]	0	0	0.269024	0.032588	-inf	-inf	1	1
chr18	-	12493139	12516225	ENST00000487491	processed_transcript	5	548	ENSG00000134278	SPIRE1	GO:0006810(transport);GO:0005737(cytoplasm);GO:0016020(membrane);GO:0015031(protein transport);GO:0016192(vesicle-mediated transport);GO:0005829(cytosol);GO:0005654(nucleoplasm);GO:0003779(actin binding);GO:0005886(plasma membrane);GO:0005856(cytoskeleton);GO:0048471(perinuclear region of cytoplasm);GO:0030659(cytoplasmic vesicle membrane);GO:0031410(cytoplasmic vesicle);GO:0045010(actin nucleati…	NA	NA	NA	spire type actin nucleation factor 1 [Source:HGNC Symbol;Acc:HGNC:30622]	0	0	0	0.169641	-inf	-inf	1	1
chr11	+	6564437	6572027	ENST00000533635	retained_intron	9	4473	ENSG00000179532	DNHD1	GO:0003777(microtubule motor activity);GO:0007018(microtubule-based movement);GO:0030286(dynein complex);GO:0070062(extracellular exosome);GO:0051959(dynein light intermediate chain binding);GO:0045503(dynein light chain binding);GO:0045505(dynein intermediate chain binding);GO:0008569(ATP-dependent microtubule motor activity, minus-end-directed);GO:0003341(cilium movement);GO:0036159(inner dynei…	NA	NA	NA	dynein heavy chain domain 1 [Source:HGNC Symbol;Acc:HGNC:26532]	0	0	0	0.486714	-inf	-inf	1	1
chr2	-	230168936	230219951	ENST00000358662	protein_coding	18	2337	ENSG00000135899	SP110	GO:0005634(nucleus);GO:0046872(metal ion binding);GO:0006351(transcription, DNA-templated);GO:0006355(regulation of transcription, DNA-templated);GO:0003677(DNA binding);GO:0007165(signal transduction);GO:0016032(viral process);GO:0004871(signal transducer activity)	NA	NA	NA	SP110 nuclear body protein [Source:HGNC Symbol;Acc:HGNC:5401]	0	0	3.09801	0	-inf	-inf	1	1
chrX	+	75285434	75303548	ENST00000526850	processed_transcript	8	730	ENSG00000094841	UPRT	GO:0005634(nucleus);GO:0005737(cytoplasm);GO:0000166(nucleotide binding);GO:0009116(nucleoside metabolic process);GO:0005525(GTP binding);GO:0005515(protein binding);GO:0005829(cytosol);GO:0006222(UMP biosynthetic process);GO:0007565(female pregnancy);GO:0007595(lactation);GO:0032868(response to insulin);GO:0004849(uridine kinase activity);GO:0006206(pyrimidine nucleobase metabolic process);GO:00…	00240(Pyrimidine metabolism)	NA	NA	uracil phosphoribosyltransferase homolog [Source:HGNC Symbol;Acc:HGNC:28334]	0	0	0	0.00523	-inf	-inf	1	1
chr3	+	132601388	132618967	ENST00000509820	nonsense_mediated_decay	3	424	ENSG00000129048	ACKR4	GO:0016020(membrane);GO:0016021(integral component of membrane);GO:0004930(G-protein coupled receptor activity);GO:0007186(G-protein coupled receptor signaling pathway);GO:0005886(plasma membrane);GO:0004871(signal transducer activity);GO:0007165(signal transduction);GO:0004950(chemokine receptor activity);GO:0006935(chemotaxis);GO:0070098(chemokine-mediated signaling pathway);GO:0005044(scavenge…	NA	NA	NA	atypical chemokine receptor 4 [Source:HGNC Symbol;Acc:HGNC:1611]	0	0	0	0.036398	-inf	-inf	1	1
chr5	-	111730642	111757229	ENST00000507742	processed_transcript	3	577	ENSG00000134986	NREP	GO:0005737(cytoplasm);GO:0005515(protein binding)	NA	NA	NA	neuronal regeneration related protein [Source:HGNC Symbol;Acc:HGNC:16834]	0	0	0.228264	0	-inf	-inf	1	1
chr19	-	50310022	50310539	ENST00000595563	antisense_RNA	2	457	ENSG00000267815	AC008655.1	NA	NA	NA	NA	NA	0	0	0	0.268456	-inf	-inf	1	1
chr17	-	13957748	13966952	ENST00000581533	lincRNA	3	511	ENSG00000266744	AC005304.3	NA	NA	NA	NA	NA	0	0	0	0.099876	-inf	-inf	1	1
chr19	+	40799425	40800991	ENST00000593972	protein_coding	2	935	ENSG00000269858	EGLN2	GO:0005654(nucleoplasm);GO:0005634(nucleus);GO:0046872(metal ion binding);GO:0016491(oxidoreductase activity);GO:0055114(oxidation-reduction process);GO:0005506(iron ion binding);GO:0016705(oxidoreductase activity, acting on paired donors, with incorporation or reduction of molecular oxygen);GO:0031418(L-ascorbic acid binding);GO:0005515(protein binding);GO:0051213(dioxygenase activity);GO:001670…	04066(HIF-1 signaling pathway);05200(Pathways in cancer);05211(Renal cell carcinoma)	NA	NA	egl-9 family hypoxia inducible factor 2 [Source:HGNC Symbol;Acc:HGNC:14660]	0	0	0.351231	0	-inf	-inf	1	1
chr17	-	6999399	7012349	ENST00000575727	antisense_RNA	4	573	ENSG00000215067	ALOX12-AS1	NA	NA	NA	NA	ALOX12 antisense RNA 1 [Source:HGNC Symbol;Acc:HGNC:51342]	0	0	0	0.092633	-inf	-inf	1	1
chr1	-	165728086	165768888	ENST00000476143	nonsense_mediated_decay	6	581	ENSG00000143183	TMCO1	GO:0006810(transport);GO:0016020(membrane);GO:0016021(integral component of membrane);GO:0005783(endoplasmic reticulum);GO:0005794(Golgi apparatus);GO:0005789(endoplasmic reticulum membrane);GO:0006811(ion transport);GO:0000139(Golgi membrane);GO:0006816(calcium ion transport);GO:0005262(calcium channel activity);GO:0070588(calcium ion transmembrane transport);GO:0030176(integral component of end…	NA	NA	NA	transmembrane and coiled-coil domains 1 [Source:HGNC Symbol;Acc:HGNC:18188]	0	0	0.15222	0	-inf	-inf	1	1
chr2	-	190518736	190534328	ENST00000492292	processed_transcript	3	622	ENSG00000189362	NEMP2	GO:0005634(nucleus);GO:0016020(membrane);GO:0016021(integral component of membrane);GO:0005637(nuclear inner membrane);GO:0005635(nuclear envelope)	NA	NA	NA	nuclear envelope integral membrane protein 2 [Source:HGNC Symbol;Acc:HGNC:33700]	0	0	0.080718	0	-inf	-inf	1	1
chr7	+	66629091	66643029	ENST00000638540	protein_coding	3	4471	ENSG00000243335	KCTD7	GO:0005737(cytoplasm);GO:0016020(membrane);GO:0005829(cytosol);GO:0051260(protein homooligomerization);GO:0005886(plasma membrane);GO:0043687(post-translational protein modification)	NA	NA	NA	potassium channel tetramerization domain containing 7 [Source:HGNC Symbol;Acc:HGNC:21957]	0	0	1.53847	0	-inf	-inf	1	1
chr11	+	64247054	64248177	ENST00000538355	antisense_RNA	2	431	ENSG00000256940	AP001453.2	NA	NA	NA	NA	NA	0	0	0.116871	0.100668	-inf	-inf	1	1
chr4	+	156876435	156876820	ENST00000625017	TEC	1	386	ENSG00000280284	AC092608.3	NA	NA	NA	NA	NA	0	0	0.064509	0	-inf	-inf	1	1
chrX	-	120930250	120932301	ENST00000419982	protein_coding	2	1165	ENSG00000226685	CT47A12	NA	NA	NA	NA	cancer/testis antigen family 47, member A12 [Source:HGNC Symbol;Acc:HGNC:33292]	0	0	0	0.017256	-inf	-inf	1	1
chr5	+	170968256	171029200	ENST00000518492	nonsense_mediated_decay	3	296	ENSG00000204764	RANBP17	GO:0006810(transport);GO:0051028(mRNA transport);GO:0005634(nucleus);GO:0005737(cytoplasm);GO:0006886(intracellular protein transport);GO:0015031(protein transport);GO:0005525(GTP binding);GO:0008536(Ran GTPase binding);GO:0005643(nuclear pore);GO:0006611(protein export from nucleus);GO:0005049(nuclear export signal receptor activity);GO:0006606(protein import into nucleus);GO:0005622(intracellul…	NA	NA	NA	RAN binding protein 17 [Source:HGNC Symbol;Acc:HGNC:14428]	0	0	0	0.052631	-inf	-inf	1	1
chr17	-	35406684	35409768	ENST00000587012	processed_transcript	2	1212	ENSG00000267745	AC060766.7	NA	NA	NA	NA	NA	0	0	0.012547	0	-inf	-inf	1	1
chr2	+	113512463	113515485	ENST00000449954	lincRNA	3	745	ENSG00000234148	LINC01961	NA	NA	NA	NA	long intergenic non-protein coding RNA 1961 [Source:HGNC Symbol;Acc:HGNC:52786]	0	0	0.055481	0	-inf	-inf	1	1
chr14	+	51826195	51966843	ENST00000553432	protein_coding	4	577	ENSG00000186469	GNG2	GO:0016020(membrane);GO:0007186(G-protein coupled receptor signaling pathway);GO:0004871(signal transducer activity);GO:0005886(plasma membrane);GO:0007165(signal transduction);GO:0005834(heterotrimeric G-protein complex);GO:0070062(extracellular exosome);GO:0006457(protein folding);GO:0030168(platelet activation);GO:0071377(cellular response to glucagon stimulus);GO:0071380(cellular response to …	04014(Ras signaling pathway);04371(Apelin signaling pathway);04151(PI3K-Akt signaling pathway);04062(Chemokine signaling pathway);04926(Relaxin signaling pathway);04724(Glutamatergic synapse);04727(GABAergic synapse);04725(Cholinergic synapse);04728(Dopaminergic synapse);04726(Serotonergic synapse);04723(Retrograde endocannabinoid signaling);04713(Circadian entrainment);05200(Pathways in cancer);…	NA	NA	G protein subunit gamma 2 [Source:HGNC Symbol;Acc:HGNC:4404]	0	0	5.2e-05	0	-inf	-inf	1	1
chr19	+	1446302	1455245	ENST00000587869	protein_coding	5	568	ENSG00000115266	APC2	GO:0008013(beta-catenin binding);GO:0030178(negative regulation of Wnt signaling pathway);GO:0090090(negative regulation of canonical Wnt signaling pathway);GO:0048471(perinuclear region of cytoplasm);GO:0005737(cytoplasm);GO:0005794(Golgi apparatus);GO:0005856(cytoskeleton);GO:0005515(protein binding);GO:0008017(microtubule binding);GO:0016055(Wnt signaling pathway);GO:0005874(microtubule);GO:00…	04310(Wnt signaling pathway);04390(Hippo signaling pathway);04550(Signaling pathways regulating pluripotency of stem cells);04810(Regulation of actin cytoskeleton);05200(Pathways in cancer);05206(MicroRNAs in cancer);05210(Colorectal cancer);05225(Hepatocellular carcinoma);05226(Gastric cancer);05217(Basal cell carcinoma);05213(Endometrial cancer);05224(Breast cancer);05166(HTLV-I infection);0516…	NA	NA	APC2, WNT signaling pathway regulator [Source:HGNC Symbol;Acc:HGNC:24036]	0	0	0	0.156792	-inf	-inf	1	1
chr14	+	69191813	69209438	ENST00000461908	processed_transcript	4	579	ENSG00000081177	EXD2	GO:0003676(nucleic acid binding);GO:0005634(nucleus);GO:0016787(hydrolase activity);GO:0006139(nucleobase-containing compound metabolic process);GO:0004527(exonuclease activity);GO:0004518(nuclease activity);GO:0008408(3'-5' exonuclease activity);GO:0005737(cytoplasm);GO:0005515(protein binding);GO:0000724(double-strand break repair via homologous recombination);GO:0006302(double-strand break rep…	NA	NA	NA	exonuclease 3'-5' domain containing 2 [Source:HGNC Symbol;Acc:HGNC:20217]	0	0	0.201282	0.140948	-inf	-inf	1	1
chr3	-	4490891	4493163	ENST00000412804	antisense_RNA	2	858	ENSG00000231249	ITPR1-AS1	NA	NA	NA	NA	ITPR1 antisense RNA 1 (head to head) [Source:HGNC Symbol;Acc:HGNC:44470]	0	0	0	0.062874	-inf	-inf	1	1
chr14	-	35219023	35219283	ENST00000633440	processed_pseudogene	1	261	ENSG00000282625	AL121594.6	NA	NA	NA	NA	NA	0	0	0	0.087731	-inf	-inf	1	1
chr16	-	78495926	78506568	ENST00000563408	antisense_RNA	3	719	ENSG00000260733	AC046158.1	NA	NA	NA	NA	NA	0	0	0	0.006477	-inf	-inf	1	1
chr1	-	94983550	95027203	ENST00000507727	processed_transcript	2	159	ENSG00000172339	ALG14	GO:0005634(nucleus);GO:0016020(membrane);GO:0016021(integral component of membrane);GO:0005783(endoplasmic reticulum);GO:0005789(endoplasmic reticulum membrane);GO:0006488(dolichol-linked oligosaccharide biosynthetic process);GO:0031965(nuclear membrane);GO:0004577(N-acetylglucosaminyldiphosphodolichol N-acetylglucosaminyltransferase activity)	00510(N-Glycan biosynthesis)	NA	NA	ALG14, UDP-N-acetylglucosaminyltransferase subunit [Source:HGNC Symbol;Acc:HGNC:28287]	0	0	0.568054	0.08543	-inf	-inf	1	1
chr11	-	66284580	66285758	ENST00000526497	processed_transcript	4	516	ENSG00000174851	YIF1A	GO:0016020(membrane);GO:0016021(integral component of membrane);GO:0006810(transport);GO:0015031(protein transport);GO:0005794(Golgi apparatus);GO:0005783(endoplasmic reticulum);GO:0005789(endoplasmic reticulum membrane);GO:0005515(protein binding);GO:0000139(Golgi membrane);GO:0016192(vesicle-mediated transport);GO:0030173(integral component of Golgi membrane);GO:0006888(ER to Golgi vesicle-medi…	NA	NA	NA	Yip1 interacting factor homolog A, membrane trafficking protein [Source:HGNC Symbol;Acc:HGNC:16688]	0	0	0.077235	0	-inf	-inf	1	1
chr2	-	73640832	73642393	ENST00000272425	protein_coding	2	947	ENSG00000144035	NAT8	GO:0016020(membrane);GO:0016021(integral component of membrane);GO:0005783(endoplasmic reticulum);GO:0016740(transferase activity);GO:0016746(transferase activity, transferring acyl groups);GO:0005789(endoplasmic reticulum membrane);GO:0008080(N-acetyltransferase activity);GO:0005515(protein binding);GO:0070062(extracellular exosome);GO:0010628(positive regulation of gene expression);GO:0044267(c…	00480(Glutathione metabolism)	K20838	EC:2.3.1.80 2.3.1.-	N-acetyltransferase 8 (putative) [Source:HGNC Symbol;Acc:HGNC:18069]	0	0	0.088387	0	-inf	-inf	1	1
chr9	+	87882826	87888899	ENST00000325643	protein_coding	4	4478	ENSG00000177992	SPATA31E1	GO:0016020(membrane);GO:0016021(integral component of membrane);GO:0030154(cell differentiation);GO:0007283(spermatogenesis)	NA	NA	NA	SPATA31 subfamily E member 1 [Source:HGNC Symbol;Acc:HGNC:26672]	0	0	0	0.013087	-inf	-inf	1	1
chr5	-	102371788	102373429	ENST00000511588	protein_coding	2	432	ENSG00000205359	SLCO6A1	GO:0006810(transport);GO:0016020(membrane);GO:0016021(integral component of membrane);GO:0005215(transporter activity);GO:0006811(ion transport);GO:0005886(plasma membrane);GO:0015347(sodium-independent organic anion transmembrane transporter activity);GO:0043252(sodium-independent organic anion transport);GO:0005887(integral component of plasma membrane)	NA	NA	NA	solute carrier organic anion transporter family member 6A1 [Source:HGNC Symbol;Acc:HGNC:23613]	0	0	0.148748	0	-inf	-inf	1	1
chr21	+	34180729	34189183	ENST00000609947	lincRNA	3	892	ENSG00000227456	LINC00310	NA	NA	NA	NA	long intergenic non-protein coding RNA 310 [Source:HGNC Symbol;Acc:HGNC:16414]	0	0	0.092526	0.057578	-inf	-inf	1	1
chr7	-	22356310	22356910	ENST00000497668	processed_transcript	2	383	ENSG00000136237	RAPGEF5	GO:0005622(intracellular);GO:0005634(nucleus);GO:0007264(small GTPase mediated signal transduction);GO:0005654(nucleoplasm);GO:0043547(positive regulation of GTPase activity);GO:0016604(nuclear body);GO:0007399(nervous system development);GO:0005085(guanyl-nucleotide exchange factor activity);GO:0030742(GTP-dependent protein binding);GO:0005088(Ras guanyl-nucleotide exchange factor activity);GO:0…	04014(Ras signaling pathway);04015(Rap1 signaling pathway)	NA	NA	Rap guanine nucleotide exchange factor 5 [Source:HGNC Symbol;Acc:HGNC:16862]	0	0	0.189799	0	-inf	-inf	1	1
chr1	-	155186123	155192867	ENST00000498431	nonsense_mediated_decay	7	667	ENSG00000185499	MUC1	GO:0016020(membrane);GO:0016021(integral component of membrane);GO:0005634(nucleus);GO:0005737(cytoplasm);GO:0005886(plasma membrane);GO:0005515(protein binding);GO:0005576(extracellular region);GO:0005615(extracellular space);GO:0070062(extracellular exosome);GO:0002223(stimulatory C-type lectin receptor signaling pathway);GO:0005887(integral component of plasma membrane);GO:0016324(apical plasm…	NA	NA	NA	mucin 1, cell surface associated [Source:HGNC Symbol;Acc:HGNC:7508]	0	0	0	0.000227	-inf	-inf	1	1
chr7	+	23598292	23611549	ENST00000486109	processed_transcript	3	800	ENSG00000169193	CCDC126	GO:0016020(membrane);GO:0005576(extracellular region);GO:0006487(protein N-linked glycosylation);GO:0030144(alpha-1,6-mannosylglycoprotein 6-beta-N-acetylglucosaminyltransferase activity);GO:0005794(Golgi apparatus)	NA	NA	NA	coiled-coil domain containing 126 [Source:HGNC Symbol;Acc:HGNC:22398]	0	0	0	0.17121	-inf	-inf	1	1
chr10	-	34201979	34202074	ENST00000362330	misc_RNA	1	96	ENSG00000199200	Y_RNA	NA	NA	NA	NA	Y RNA [Source:RFAM;Acc:RF00019]	0	0	0.014642	0	-inf	-inf	1	1
chr6	+	22147208	22151668	ENST00000605917	lincRNA	1	4461	ENSG00000272168	CASC15	NA	NA	NA	NA	cancer susceptibility 15 (non-protein coding) [Source:HGNC Symbol;Acc:HGNC:28245]	0	0	0	0.01218	-inf	-inf	1	1
chr19	-	50662630	50666733	ENST00000468654	nonsense_mediated_decay	3	668	ENSG00000161681	SHANK1	GO:0005737(cytoplasm);GO:0016020(membrane);GO:0005886(plasma membrane);GO:0030054(cell junction);GO:0045202(synapse);GO:0045211(postsynaptic membrane);GO:0007399(nervous system development);GO:0030154(cell differentiation);GO:0030425(dendrite);GO:0005515(protein binding);GO:0005829(cytosol);GO:0005622(intracellular);GO:0014069(postsynaptic density);GO:0097110(scaffold protein binding);GO:0042802(…	04724(Glutamatergic synapse)	NA	NA	SH3 and multiple ankyrin repeat domains 1 [Source:HGNC Symbol;Acc:HGNC:15474]	0	0	0.037254	0	-inf	-inf	1	1
chr5	-	73803296	73803599	ENST00000508746	processed_pseudogene	1	304	ENSG00000184084	AC091868.1	NA	NA	NA	NA	NA	0	0	0	0.241923	-inf	-inf	1	1
chr2	+	118088474	118110020	ENST00000471186	processed_transcript	4	2100	ENSG00000125629	INSIG2	GO:0016020(membrane);GO:0016021(integral component of membrane);GO:0006629(lipid metabolic process);GO:0005783(endoplasmic reticulum);GO:0005789(endoplasmic reticulum membrane);GO:0008202(steroid metabolic process);GO:0005515(protein binding);GO:0008134(transcription factor binding);GO:0006641(triglyceride metabolic process);GO:0006695(cholesterol biosynthetic process);GO:0006991(response to ster…	NA	NA	NA	insulin induced gene 2 [Source:HGNC Symbol;Acc:HGNC:20452]	0	0	0	1.5524	-inf	-inf	1	1
chr2	+	111123746	111164231	ENST00000415458	nonsense_mediated_decay	4	438	ENSG00000153094	BCL2L11	GO:0016020(membrane);GO:0005739(mitochondrion);GO:0005515(protein binding);GO:0006915(apoptotic process);GO:0005829(cytosol);GO:0008017(microtubule binding);GO:0012505(endomembrane system);GO:0043065(positive regulation of apoptotic process);GO:0032464(positive regulation of protein homooligomerization);GO:0090200(positive regulation of release of cytochrome c from mitochondria);GO:0005741(mitoch…	04068(FoxO signaling pathway);04151(PI3K-Akt signaling pathway);04210(Apoptosis);04215(Apoptosis - multiple species);05200(Pathways in cancer);05206(MicroRNAs in cancer);05210(Colorectal cancer);04932(Non-alcoholic fatty liver disease (NAFLD));01521(EGFR tyrosine kinase inhibitor resistance)	K16341	NA	BCL2 like 11 [Source:HGNC Symbol;Acc:HGNC:994]	0	0	0	0.195654	-inf	-inf	1	1
chr2	+	94861362	94862667	ENST00000618617	processed_pseudogene	1	1306	ENSG00000278631	AC097374.2	NA	NA	NA	NA	NA	0	0	0.02883	0	-inf	-inf	1	1
chr5	+	176590601	176591690	ENST00000416365	retained_intron	3	488	ENSG00000074276	CDHR2	GO:0016020(membrane);GO:0016021(integral component of membrane);GO:0005509(calcium ion binding);GO:0007155(cell adhesion);GO:0007156(homophilic cell adhesion via plasma membrane adhesion molecules);GO:0005886(plasma membrane);GO:0042995(cell projection);GO:0005515(protein binding);GO:0030054(cell junction);GO:0030154(cell differentiation);GO:0070062(extracellular exosome);GO:0005903(brush border)…	NA	NA	NA	cadherin related family member 2 [Source:HGNC Symbol;Acc:HGNC:18231]	0	0	1.29404	0.738443	-inf	-inf	1	1
chr5	+	56136979	56137531	ENST00000467688	processed_pseudogene	1	553	ENSG00000243592	AC016638.1	NA	NA	NA	NA	NA	0	0	0.10567	0.103926	-inf	-inf	1	1
chr22	+	23763223	23765861	ENST00000382821	protein_coding	6	646	ENSG00000169314	C22orf15	NA	NA	NA	NA	chromosome 22 open reading frame 15 [Source:HGNC Symbol;Acc:HGNC:15558]	0	0	0.036198	0	-inf	-inf	1	1
chr6	+	106087580	106095620	ENST00000424894	protein_coding	3	583	ENSG00000057657	PRDM1	GO:0003676(nucleic acid binding);GO:0005634(nucleus);GO:0005737(cytoplasm);GO:0046872(metal ion binding);GO:0008168(methyltransferase activity);GO:0016740(transferase activity);GO:0032259(methylation);GO:0006351(transcription, DNA-templated);GO:0006355(regulation of transcription, DNA-templated);GO:0003677(DNA binding);GO:0005515(protein binding);GO:0002376(immune system process);GO:0045087(innat…	NA	NA	NA	PR/SET domain 1 [Source:HGNC Symbol;Acc:HGNC:9346]	0	0	0	0.071366	-inf	-inf	1	1
chr12	+	122975242	122977653	ENST00000420319	retained_intron	3	1039	ENSG00000111325	OGFOD2	GO:0046872(metal ion binding);GO:0016491(oxidoreductase activity);GO:0055114(oxidation-reduction process);GO:0005506(iron ion binding);GO:0016705(oxidoreductase activity, acting on paired donors, with incorporation or reduction of molecular oxygen);GO:0031418(L-ascorbic acid binding);GO:0051213(dioxygenase activity)	NA	NA	NA	2-oxoglutarate and iron dependent oxygenase domain containing 2 [Source:HGNC Symbol;Acc:HGNC:25823]	0	0	0.118025	0.03032	-inf	-inf	1	1
chr11	-	31789962	31811341	ENST00000638913	retained_intron	12	2390	ENSG00000007372	PAX6	GO:0010628(positive regulation of gene expression);GO:0045944(positive regulation of transcription from RNA polymerase II promoter);GO:0005634(nucleus);GO:0005737(cytoplasm);GO:0005829(cytosol);GO:0005654(nucleoplasm);GO:0006355(regulation of transcription, DNA-templated);GO:0006351(transcription, DNA-templated);GO:0003677(DNA binding);GO:0016567(protein ubiquitination);GO:0043565(sequence-specif…	04550(Signaling pathways regulating pluripotency of stem cells);04950(Maturity onset diabetes of the young)	NA	NA	paired box 6 [Source:HGNC Symbol;Acc:HGNC:8620]	0	0	0	0.00099	-inf	-inf	1	1
chr19	+	9324197	9364914	ENST00000605301	processed_transcript	6	565	ENSG00000270011	ZNF559-ZNF177	GO:0003676(nucleic acid binding);GO:0006355(regulation of transcription, DNA-templated);GO:0005622(intracellular);GO:0046872(metal ion binding)	NA	NA	NA	ZNF559-ZNF177 readthrough [Source:HGNC Symbol;Acc:HGNC:42964]	0	0	0.014143	0	-inf	-inf	1	1
chr5	+	123512260	123614455	ENST00000511130	protein_coding	10	1356	ENSG00000151292	CSNK1G3	GO:0005737(cytoplasm);GO:0000166(nucleotide binding);GO:0004672(protein kinase activity);GO:0004674(protein serine/threonine kinase activity);GO:0005524(ATP binding);GO:0006468(protein phosphorylation);GO:0016740(transferase activity);GO:0016301(kinase activity);GO:0016310(phosphorylation);GO:0016055(Wnt signaling pathway);GO:0005634(nucleus);GO:0008360(regulation of cell shape);GO:0007165(signal…	04340(Hedgehog signaling pathway)	K08958	EC:2.7.11.1	casein kinase 1 gamma 3 [Source:HGNC Symbol;Acc:HGNC:2456]	0	0	0	0.443973	-inf	-inf	1	1
chrX	+	150692978	150730129	ENST00000439546	protein_coding	8	573	ENSG00000063601	MTMR1	GO:0046856(phosphatidylinositol dephosphorylation);GO:0004438(phosphatidylinositol-3-phosphatase activity);GO:0052629(phosphatidylinositol-3,5-bisphosphate 3-phosphatase activity);GO:0005737(cytoplasm);GO:0016020(membrane);GO:0016787(hydrolase activity);GO:0006629(lipid metabolic process);GO:0004725(protein tyrosine phosphatase activity);GO:0016791(phosphatase activity);GO:0016311(dephosphorylati…	00562(Inositol phosphate metabolism);04070(Phosphatidylinositol signaling system)	NA	NA	myotubularin related protein 1 [Source:HGNC Symbol;Acc:HGNC:7449]	0	0	0.000501	0	-inf	-inf	1	1
chrX	+	101219769	101264497	ENST00000402866	protein_coding	24	7018	ENSG00000102385	DRP2	GO:0016020(membrane);GO:0008270(zinc ion binding);GO:0046872(metal ion binding);GO:0005886(plasma membrane);GO:0042995(cell projection);GO:0030054(cell junction);GO:0045202(synapse);GO:0045211(postsynaptic membrane);GO:0007417(central nervous system development);GO:0030425(dendrite);GO:0043204(perikaryon);GO:0014069(postsynaptic density);GO:0050808(synapse organization)	NA	NA	NA	dystrophin related protein 2 [Source:HGNC Symbol;Acc:HGNC:3032]	0	0	0.009083	0	-inf	-inf	1	1
chr1	+	43736263	43930221	ENST00000533997	nonsense_mediated_decay	10	1007	ENSG00000126091	ST3GAL3	GO:0016020(membrane);GO:0016021(integral component of membrane);GO:0016740(transferase activity);GO:0008373(sialyltransferase activity);GO:0016757(transferase activity, transferring glycosyl groups);GO:0006486(protein glycosylation);GO:0097503(sialylation);GO:0005794(Golgi apparatus);GO:0005576(extracellular region);GO:0032580(Golgi cisterna membrane);GO:0000139(Golgi membrane);GO:0016266(O-glyca…	00515(Mannose type O-glycan biosyntheis);00514(Other types of O-glycan biosynthesis);00533(Glycosaminoglycan biosynthesis - keratan sulfate);00601(Glycosphingolipid biosynthesis - lacto and neolacto series)	NA	NA	ST3 beta-galactoside alpha-2,3-sialyltransferase 3 [Source:HGNC Symbol;Acc:HGNC:10866]	0	0	0	0.023551	-inf	-inf	1	1
chr1	+	163068775	163076802	ENST00000421743	protein_coding	6	3311	ENSG00000117152	RGS4	GO:0007186(G-protein coupled receptor signaling pathway);GO:0005096(GTPase activator activity);GO:0005886(plasma membrane);GO:0009968(negative regulation of signal transduction);GO:0005634(nucleus);GO:0005737(cytoplasm);GO:0008277(regulation of G-protein coupled receptor protein signaling pathway);GO:0005516(calmodulin binding);GO:0000188(inactivation of MAPK activity);GO:0001965(G-protein alpha-…	NA	NA	NA	regulator of G protein signaling 4 [Source:HGNC Symbol;Acc:HGNC:10000]	0	0	0	0.018403	-inf	-inf	1	1
chr19	-	35739528	35740549	ENST00000591748	protein_coding	3	329	ENSG00000126246	IGFLR1	GO:0016020(membrane);GO:0016021(integral component of membrane);GO:0005886(plasma membrane);GO:0005515(protein binding)	NA	NA	NA	IGF like family receptor 1 [Source:HGNC Symbol;Acc:HGNC:23620]	0	0	0.020102	0	-inf	-inf	1	1
chr5	-	132483086	132490262	ENST00000405885	protein_coding	10	2061	ENSG00000125347	IRF1	GO:0005634(nucleus);GO:0005737(cytoplasm);GO:0006355(regulation of transcription, DNA-templated);GO:0006351(transcription, DNA-templated);GO:0003677(DNA binding);GO:0003700(transcription factor activity, sequence-specific DNA binding);GO:0006915(apoptotic process);GO:0005515(protein binding);GO:0008285(negative regulation of cell proliferation);GO:0045893(positive regulation of transcription, DNA…	04917(Prolactin signaling pathway);05133(Pertussis);05160(Hepatitis C);05165(Human papillomavirus infection)	NA	NA	interferon regulatory factor 1 [Source:HGNC Symbol;Acc:HGNC:6116]	0	0	0.008477	5.86118	-inf	-inf	1	1
chr10	-	73814288	73874461	ENST00000305762	protein_coding	21	1820	ENSG00000148660	CAMK2G	GO:0016020(membrane);GO:0000166(nucleotide binding);GO:0004672(protein kinase activity);GO:0004674(protein serine/threonine kinase activity);GO:0005524(ATP binding);GO:0006468(protein phosphorylation);GO:0016740(transferase activity);GO:0016301(kinase activity);GO:0016310(phosphorylation);GO:0043547(positive regulation of GTPase activity);GO:0005515(protein binding);GO:0007275(multicellular organ…	04012(ErbB signaling pathway);04310(Wnt signaling pathway);04066(HIF-1 signaling pathway);04020(Calcium signaling pathway);04024(cAMP signaling pathway);04114(Oocyte meiosis);04217(Necroptosis);04911(Insulin secretion);04922(Glucagon signaling pathway);04912(GnRH signaling pathway);04921(Oxytocin signaling pathway);04916(Melanogenesis);04925(Aldosterone synthesis and secretion);04261(Adrenergic s…	K04515	EC:2.7.11.17	calcium/calmodulin dependent protein kinase II gamma [Source:HGNC Symbol;Acc:HGNC:1463]	0	0	0.173632	0.788102	-inf	-inf	1	1
chr17	-	11998353	12021508	ENST00000579522	processed_transcript	4	462	ENSG00000241185	AC005410.1	NA	NA	NA	NA	NA	0	0	0	0.030382	-inf	-inf	1	1
chr6	+	143857318	143938471	ENST00000454207	nonsense_mediated_decay	10	1496	ENSG00000280148	AL049844.3	GO:0000056(ribosomal small subunit export from nucleus);GO:0042274(ribosomal small subunit biogenesis);GO:0005634(nucleus);GO:0030688(preribosome, small subunit precursor);GO:0031902(late endosome membrane);GO:0034448(EGO complex)	NA	NA	NA	NA	0	0	0.029391	0	-inf	-inf	1	1
chr9	-	5351796	5352410	ENST00000608422	lincRNA	1	615	ENSG00000272866	AL135786.2	NA	NA	NA	NA	NA	0	0	0	0.035024	-inf	-inf	1	1
chr7	-	32732981	32733077	ENST00000637473	miRNA	1	97	ENSG00000283461	hsa-mir-550a-2	NA	NA	NA	NA	hsa-mir-550a-2 [Source:miRBase;Acc:MI0003601]	0	0	0.035193	0	-inf	-inf	1	1
chr7	+	87629230	87741576	ENST00000489461	processed_transcript	6	583	ENSG00000105784	RUNDC3B	NA	NA	NA	NA	RUN domain containing 3B [Source:HGNC Symbol;Acc:HGNC:30286]	0	0	0.050548	0	-inf	-inf	1	1
chr4	-	55374924	55386892	ENST00000619203	retained_intron	4	976	ENSG00000249700	SRD5A3-AS1	NA	NA	NA	NA	SRD5A3 antisense RNA 1 [Source:HGNC Symbol;Acc:HGNC:44138]	0	0	0	0.004341	-inf	-inf	1	1
chr11	-	66848526	66958376	ENST00000393960	protein_coding	23	4192	ENSG00000173599	PC	GO:0005739(mitochondrion);GO:0046872(metal ion binding);GO:0000166(nucleotide binding);GO:0005524(ATP binding);GO:0003824(catalytic activity);GO:0006629(lipid metabolic process);GO:0004075(biotin carboxylase activity);GO:0016874(ligase activity);GO:0005515(protein binding);GO:0008152(metabolic process);GO:0005759(mitochondrial matrix);GO:0004736(pyruvate carboxylase activity);GO:0009374(biotin bi…	00020(Citrate cycle (TCA cycle));00620(Pyruvate metabolism)	K01958	EC:6.4.1.1	pyruvate carboxylase [Source:HGNC Symbol;Acc:HGNC:8636]	0	0	0.173838	0.060291	-inf	-inf	1	1
chr12	-	16551318	16605913	ENST00000539232	nonsense_mediated_decay	4	580	ENSG00000048540	LMO3	GO:0005737(cytoplasm);GO:0046872(metal ion binding);GO:0006351(transcription, DNA-templated);GO:0006355(regulation of transcription, DNA-templated);GO:0005515(protein binding);GO:0070373(negative regulation of ERK1 and ERK2 cascade);GO:0045600(positive regulation of fat cell differentiation);GO:0035360(positive regulation of peroxisome proliferator activated receptor signaling pathway);GO:2000324…	NA	NA	NA	LIM domain only 3 [Source:HGNC Symbol;Acc:HGNC:6643]	0	0	0	0.180834	-inf	-inf	1	1
chr14	-	80899973	80959484	ENST00000555529	protein_coding	8	869	ENSG00000100629	CEP128	GO:0005737(cytoplasm);GO:0005856(cytoskeleton);GO:0000922(spindle pole);GO:0005814(centriole)	NA	NA	NA	centrosomal protein 128 [Source:HGNC Symbol;Acc:HGNC:20359]	0	0	0	0.015967	-inf	-inf	1	1
chr16	-	67233681	67247478	ENST00000561922	nonsense_mediated_decay	13	2069	ENSG00000135723	FHOD1	GO:0045944(positive regulation of transcription from RNA polymerase II promoter);GO:0005634(nucleus);GO:0005737(cytoplasm);GO:0016020(membrane);GO:0005829(cytosol);GO:0003779(actin binding);GO:0005856(cytoskeleton);GO:0042995(cell projection);GO:0042802(identical protein binding);GO:0005515(protein binding);GO:0019904(protein domain specific binding);GO:0051496(positive regulation of stress fiber…	NA	NA	NA	formin homology 2 domain containing 1 [Source:HGNC Symbol;Acc:HGNC:17905]	0	0	0	0.003127	-inf	-inf	1	1
chr12	+	991233	1490729	ENST00000542302	nonsense_mediated_decay	21	4323	ENSG00000082805	ERC1	GO:0048786(presynaptic active zone);GO:0006810(transport);GO:0005737(cytoplasm);GO:0016020(membrane);GO:0015031(protein transport);GO:0006355(regulation of transcription, DNA-templated);GO:0005794(Golgi apparatus);GO:0005515(protein binding);GO:0000139(Golgi membrane);GO:0007275(multicellular organism development);GO:0045296(cadherin binding);GO:0043066(negative regulation of apoptotic process);G…	04064(NF-kappa B signaling pathway)	K16072	NA	ELKS/RAB6-interacting/CAST family member 1 [Source:HGNC Symbol;Acc:HGNC:17072]	0	0	0.054319	0	-inf	-inf	1	1
chr8	+	97869154	98036214	ENST00000522025	protein_coding	18	2731	ENSG00000132561	MATN2	GO:0005509(calcium ion binding);GO:0005515(protein binding);GO:0005576(extracellular region);GO:0005578(proteinaceous extracellular matrix);GO:0003674(molecular_function);GO:0008150(biological_process);GO:0031012(extracellular matrix);GO:0001764(neuron migration);GO:0007411(axon guidance);GO:0008347(glial cell migration);GO:0031104(dendrite regeneration);GO:0031175(neuron projection development);…	NA	NA	NA	matrilin 2 [Source:HGNC Symbol;Acc:HGNC:6908]	0	0	0.012551	0	-inf	-inf	1	1
chr13	-	22897341	22898005	ENST00000430708	processed_pseudogene	1	665	ENSG00000230535	BASP1P1	NA	NA	NA	NA	brain abundant, membrane attached signal protein 1 pseudogene 1 [Source:HGNC Symbol;Acc:HGNC:39418]	0	0	0	0.041728	-inf	-inf	1	1
chr3	+	14651746	14672653	ENST00000611584	protein_coding	10	2727	ENSG00000154781	CCDC174	GO:0005634(nucleus);GO:0005654(nucleoplasm);GO:0005515(protein binding)	NA	NA	NA	coiled-coil domain containing 174 [Source:HGNC Symbol;Acc:HGNC:28033]	0	0	0.004457	0.001063	-inf	-inf	1	1
chr6	-	8015657	8041908	ENST00000486432	processed_transcript	4	423	ENSG00000188428	BLOC1S5	GO:0043231(intracellular membrane-bounded organelle);GO:1904115(axon cytoplasm);GO:0005515(protein binding);GO:0031083(BLOC-1 complex);GO:0030133(transport vesicle);GO:0008089(anterograde axonal transport);GO:0032438(melanosome organization);GO:0048490(anterograde synaptic vesicle transport);GO:0031175(neuron projection development);GO:0035646(endosome to melanosome transport);GO:0032402(melanoso…	NA	NA	NA	biogenesis of lysosomal organelles complex 1 subunit 5 [Source:HGNC Symbol;Acc:HGNC:18561]	0	0	0	0.162042	-inf	-inf	1	1
chr13	+	49496016	49528708	ENST00000426879	protein_coding	9	903	ENSG00000136147	PHF11	GO:0005634(nucleus);GO:0046872(metal ion binding);GO:0005654(nucleoplasm);GO:0006351(transcription, DNA-templated);GO:0006355(regulation of transcription, DNA-templated);GO:0031965(nuclear membrane)	NA	NA	NA	PHD finger protein 11 [Source:HGNC Symbol;Acc:HGNC:17024]	0	0	0.165738	0.187783	-inf	-inf	1	1
chr1	+	219173895	219212865	ENST00000463964	processed_transcript	6	1874	ENSG00000143353	LYPLAL1	GO:0005737(cytoplasm);GO:0005829(cytosol);GO:0016787(hydrolase activity);GO:0008150(biological_process);GO:0070062(extracellular exosome);GO:0052689(carboxylic ester hydrolase activity);GO:0002084(protein depalmitoylation);GO:0008474(palmitoyl-(protein) hydrolase activity);GO:0004622(lysophospholipase activity)	NA	NA	NA	lysophospholipase like 1 [Source:HGNC Symbol;Acc:HGNC:20440]	0	0	0	0.064509	-inf	-inf	1	1
chr18	-	9550369	9562072	ENST00000584754	processed_transcript	5	509	ENSG00000154845	PPP4R1	GO:0007165(signal transduction);GO:0004721(phosphoprotein phosphatase activity);GO:0005515(protein binding);GO:0050790(regulation of catalytic activity);GO:0019888(protein phosphatase regulator activity);GO:0006470(protein dephosphorylation);GO:0030289(protein phosphatase 4 complex);GO:0006468(protein phosphorylation)	NA	NA	NA	protein phosphatase 4 regulatory subunit 1 [Source:HGNC Symbol;Acc:HGNC:9320]	0	0	0.166126	0.133577	-inf	-inf	1	1
chr13	+	113895103	113921317	ENST00000426859	lincRNA	8	1607	ENSG00000229373	LINC00452	NA	NA	NA	NA	long intergenic non-protein coding RNA 452 [Source:HGNC Symbol;Acc:HGNC:42800]	0	0	0.017998	0	-inf	-inf	1	1
chr20	+	21145589	21246622	ENST00000619179	protein_coding	9	1663	ENSG00000088970	KIZ	GO:0005737(cytoplasm);GO:0005856(cytoskeleton);GO:0042995(cell projection);GO:0005515(protein binding);GO:0005813(centrosome);GO:0005815(microtubule organizing center);GO:0007051(spindle organization);GO:0019901(protein kinase binding);GO:0016020(membrane);GO:0016021(integral component of membrane)	NA	NA	NA	kizuna centrosomal protein [Source:HGNC Symbol;Acc:HGNC:15865]	0	0	0	1.59996	-inf	-inf	1	1
chr1	+	231626815	231819244	ENST00000295051	nonsense_mediated_decay	8	2706	ENSG00000162946	DISC1	GO:0005737(cytoplasm);GO:0016020(membrane);GO:0005886(plasma membrane);GO:0005856(cytoskeleton);GO:0005515(protein binding);GO:0007275(multicellular organism development);GO:0016055(Wnt signaling pathway);GO:0030054(cell junction);GO:0045202(synapse);GO:0045211(postsynaptic membrane);GO:0007399(nervous system development);GO:0005874(microtubule);GO:0005813(centrosome);GO:0005815(microtubule organ…	NA	NA	NA	disrupted in schizophrenia 1 [Source:HGNC Symbol;Acc:HGNC:2888]	0	0	0	0.061664	-inf	-inf	1	1
chr7	-	76389334	76393490	ENST00000492979	processed_transcript	3	1224	ENSG00000146700	SSC4D	GO:0016020(membrane);GO:0005576(extracellular region);GO:0005044(scavenger receptor activity);GO:0006898(receptor-mediated endocytosis);GO:0070062(extracellular exosome)	NA	NA	NA	scavenger receptor cysteine rich family member with 4 domains [Source:HGNC Symbol;Acc:HGNC:14461]	0	0	0.092652	0.004403	-inf	-inf	1	1
chr16	+	2076158	2079623	ENST00000471143	nonsense_mediated_decay	5	577	ENSG00000103197	TSC2	GO:0005634(nucleus);GO:0005737(cytoplasm);GO:0016020(membrane);GO:0005829(cytosol);GO:0005794(Golgi apparatus);GO:0032007(negative regulation of TOR signaling);GO:0042803(protein homodimerization activity);GO:0005515(protein binding);GO:0005096(GTPase activator activity);GO:0048471(perinuclear region of cytoplasm);GO:0043547(positive regulation of GTPase activity);GO:0051056(regulation of small G…	04072(Phospholipase D signaling pathway);04151(PI3K-Akt signaling pathway);04152(AMPK signaling pathway);04150(mTOR signaling pathway);04140(Autophagy - animal);04115(p53 signaling pathway);04218(Cellular senescence);04910(Insulin signaling pathway);04919(Thyroid hormone signaling pathway);04211(Longevity regulating pathway - mammal);05231(Choline metabolism in cancer);05165(Human papillomavirus …	NA	NA	tuberous sclerosis 2 [Source:HGNC Symbol;Acc:HGNC:12363]	0	0	0.01418	0	-inf	-inf	1	1
chr11	-	111910419	111912927	ENST00000528628	protein_coding	3	624	ENSG00000109846	CRYAB	GO:0005634(nucleus);GO:0005737(cytoplasm);GO:0046872(metal ion binding);GO:0042803(protein homodimerization activity);GO:0005515(protein binding);GO:0005212(structural constituent of eye lens);GO:0042802(identical protein binding);GO:0005654(nucleoplasm);GO:0070062(extracellular exosome);GO:0006936(muscle contraction);GO:0051082(unfolded protein binding);GO:1900034(regulation of cellular response…	04141(Protein processing in endoplasmic reticulum);04213(Longevity regulating pathway - multiple species)	NA	NA	crystallin alpha B [Source:HGNC Symbol;Acc:HGNC:2389]	0	0	0.040977	0	-inf	-inf	1	1
chr1	+	205066352	205074944	ENST00000638715	retained_intron	9	2903	ENSG00000184144	CNTN2	GO:0016020(membrane);GO:0007155(cell adhesion);GO:0005886(plasma membrane);GO:0007399(nervous system development);GO:0031175(neuron projection development);GO:0031225(anchored component of membrane);GO:0005887(integral component of plasma membrane);GO:0042802(identical protein binding);GO:0045202(synapse);GO:0033268(node of Ranvier);GO:0044224(juxtaparanode region of axon);GO:0045163(clustering o…	04514(Cell adhesion molecules (CAMs))	NA	NA	contactin 2 [Source:HGNC Symbol;Acc:HGNC:2172]	0	0	0.07943	0	-inf	-inf	1	1
chr16	+	3065663	3069440	ENST00000552664	protein_coding	7	731	ENSG00000008517	IL32	GO:0016020(membrane);GO:0005515(protein binding);GO:0005576(extracellular region);GO:0006955(immune response);GO:0005125(cytokine activity);GO:0005615(extracellular space);GO:0005829(cytosol);GO:0007155(cell adhesion);GO:0006952(defense response)	NA	NA	NA	interleukin 32 [Source:HGNC Symbol;Acc:HGNC:16830]	0	0	0	0.181478	-inf	-inf	1	1
chr17	-	72324063	72339567	ENST00000581183	lincRNA	5	657	ENSG00000227036	LINC00511	NA	NA	NA	NA	long intergenic non-protein coding RNA 511 [Source:HGNC Symbol;Acc:HGNC:43564]	0	0	0.061844	0.063218	-inf	-inf	1	1
chr2	-	99068926	99127168	ENST00000488960	processed_transcript	7	842	ENSG00000135951	TSGA10	GO:0005634(nucleus);GO:0005737(cytoplasm);GO:0016020(membrane);GO:0005515(protein binding);GO:0007283(spermatogenesis);GO:0003674(molecular_function);GO:0005575(cellular_component);GO:0031965(nuclear membrane);GO:0030031(cell projection assembly);GO:0031514(motile cilium);GO:0043005(neuron projection)	NA	NA	NA	testis specific 10 [Source:HGNC Symbol;Acc:HGNC:14927]	0	0	0.236211	0.158084	-inf	-inf	1	1
chr17	-	5482810	5486811	ENST00000571968	processed_transcript	3	567	ENSG00000072849	DERL2	GO:0016020(membrane);GO:0016021(integral component of membrane);GO:0005783(endoplasmic reticulum);GO:0005789(endoplasmic reticulum membrane);GO:0005515(protein binding);GO:0004252(serine-type endopeptidase activity);GO:0044322(endoplasmic reticulum quality control compartment);GO:0006986(response to unfolded protein);GO:0008284(positive regulation of cell proliferation);GO:0030433(ubiquitin-depen…	04141(Protein processing in endoplasmic reticulum)	NA	NA	derlin 2 [Source:HGNC Symbol;Acc:HGNC:17943]	0	0	0	0.359826	-inf	-inf	1	1
chr9	+	5450503	5470566	ENST00000381573	protein_coding	6	3343	ENSG00000120217	CD274	GO:0016020(membrane);GO:0016021(integral component of membrane);GO:0005886(plasma membrane);GO:0005515(protein binding);GO:0007165(signal transduction);GO:0006955(immune response);GO:0070062(extracellular exosome);GO:0042102(positive regulation of T cell proliferation);GO:0012505(endomembrane system);GO:0032689(negative regulation of interferon-gamma production);GO:0046007(negative regulation of …	04514(Cell adhesion molecules (CAMs))	K06745	NA	CD274 molecule [Source:HGNC Symbol;Acc:HGNC:17635]	0	0	0.3624	0	-inf	-inf	1	1
chr4	+	147506091	147506765	ENST00000511083	processed_pseudogene	1	675	ENSG00000251254	GTF2F2P1	NA	NA	NA	NA	general transcription factor IIF subunit 2 pseudogene 1 [Source:HGNC Symbol;Acc:HGNC:4654]	0	0	0.034807	0.097456	-inf	-inf	1	1
chr16	-	30092577	30096915	ENST00000563788	protein_coding	5	730	ENSG00000090238	YPEL3	GO:0005634(nucleus);GO:0046872(metal ion binding);GO:0005730(nucleolus);GO:2000774(positive regulation of cellular senescence)	NA	NA	NA	yippee like 3 [Source:HGNC Symbol;Acc:HGNC:18327]	0	0	0.247566	0	-inf	-inf	1	1
chr19	-	36447682	36489506	ENST00000424129	protein_coding	5	2644	ENSG00000186017	ZNF566	GO:0003676(nucleic acid binding);GO:0016020(membrane);GO:0016021(integral component of membrane);GO:0005634(nucleus);GO:0046872(metal ion binding);GO:0006355(regulation of transcription, DNA-templated);GO:0006351(transcription, DNA-templated);GO:0003677(DNA binding);GO:0005622(intracellular)	NA	NA	NA	zinc finger protein 566 [Source:HGNC Symbol;Acc:HGNC:25919]	0	0	0.071319	0.073567	-inf	-inf	1	1
chr6	-	152121687	152218385	ENST00000367257	protein_coding	25	5022	ENSG00000131018	SYNE1	GO:0003723(RNA binding);GO:0005634(nucleus);GO:0005737(cytoplasm);GO:0016020(membrane);GO:0016021(integral component of membrane);GO:0005654(nucleoplasm);GO:0031965(nuclear membrane);GO:0051015(actin filament binding);GO:0005794(Golgi apparatus);GO:0003779(actin binding);GO:0042803(protein homodimerization activity);GO:0005856(cytoskeleton);GO:0005515(protein binding);GO:0034993(LINC complex);GO:…	NA	NA	NA	spectrin repeat containing nuclear envelope protein 1 [Source:HGNC Symbol;Acc:HGNC:17089]	0	0	0	0.322686	-inf	-inf	1	1
chr17	-	44355967	44363812	ENST00000589407	nonsense_mediated_decay	7	1066	ENSG00000161682	FAM171A2	GO:0016020(membrane);GO:0016021(integral component of membrane)	NA	NA	NA	family with sequence similarity 171 member A2 [Source:HGNC Symbol;Acc:HGNC:30480]	0	0	0.124176	0.323804	-inf	-inf	1	1
chr2	+	237487251	237510711	ENST00000477222	processed_transcript	4	596	ENSG00000115648	MLPH	GO:0005622(intracellular);GO:0006886(intracellular protein transport);GO:0017137(Rab GTPase binding);GO:0005737(cytoplasm);GO:0046872(metal ion binding);GO:0005515(protein binding);GO:0048471(perinuclear region of cytoplasm);GO:0030425(dendrite);GO:0070062(extracellular exosome);GO:0030864(cortical actin cytoskeleton);GO:0003779(actin binding);GO:0017022(myosin binding);GO:0030050(vesicle transpo…	NA	NA	NA	melanophilin [Source:HGNC Symbol;Acc:HGNC:29643]	0	0	0.026158	0.147729	-inf	-inf	1	1
chr2	+	88765807	88779565	ENST00000421951	processed_transcript	4	1899	ENSG00000230006	ANKRD36BP2	NA	NA	NA	NA	ankyrin repeat domain 36B pseudogene 2 [Source:HGNC Symbol;Acc:HGNC:33607]	0	0	0.031935	0	-inf	-inf	1	1
chr5	-	94825961	94826694	ENST00000478965	processed_pseudogene	1	734	ENSG00000243806	RPL7P18	NA	NA	NA	NA	ribosomal protein L7 pseudogene 18 [Source:HGNC Symbol;Acc:HGNC:36949]	0	0	0	0.022207	-inf	-inf	1	1
chr9	+	129834698	129852636	ENST00000491053	processed_transcript	3	590	ENSG00000136878	USP20	GO:0005737(cytoplasm);GO:0008270(zinc ion binding);GO:0046872(metal ion binding);GO:0004843(thiol-dependent ubiquitin-specific protease activity);GO:0016579(protein deubiquitination);GO:0016787(hydrolase activity);GO:0005856(cytoskeleton);GO:0005515(protein binding);GO:0008233(peptidase activity);GO:0008234(cysteine-type peptidase activity);GO:0006508(proteolysis);GO:0006511(ubiquitin-dependent p…	NA	NA	NA	ubiquitin specific peptidase 20 [Source:HGNC Symbol;Acc:HGNC:12619]	0	0	0	0.421952	-inf	-inf	1	1
chr10	+	75210848	75231277	ENST00000313132	protein_coding	11	1467	ENSG00000165637	VDAC2	GO:0055085(transmembrane transport);GO:0005739(mitochondrion);GO:0008308(voltage-gated anion channel activity);GO:0098656(anion transmembrane transport);GO:1903959(regulation of anion transmembrane transport);GO:0005741(mitochondrial outer membrane);GO:0006810(transport);GO:0005634(nucleus);GO:0016020(membrane);GO:0016021(integral component of membrane);GO:0000166(nucleotide binding);GO:0006811(i…	04020(Calcium signaling pathway);04022(cGMP - PKG signaling pathway);04216(Ferroptosis);04217(Necroptosis);04218(Cellular senescence);04621(NOD-like receptor signaling pathway);04979(Cholesterol metabolism);05012(Parkinson's disease);05016(Huntington's disease);05166(HTLV-I infection)	K15040	NA	voltage dependent anion channel 2 [Source:HGNC Symbol;Acc:HGNC:12672]	0	0	0	0.001852	-inf	-inf	1	1
chr7	-	24870775	24918093	ENST00000415162	protein_coding	5	534	ENSG00000070882	OSBPL3	GO:0006810(transport);GO:0005634(nucleus);GO:0005737(cytoplasm);GO:0016020(membrane);GO:0005829(cytosol);GO:0005783(endoplasmic reticulum);GO:0005789(endoplasmic reticulum membrane);GO:0005886(plasma membrane);GO:0042995(cell projection);GO:0005515(protein binding);GO:0006869(lipid transport);GO:0008289(lipid binding);GO:0031965(nuclear membrane);GO:0006699(bile acid biosynthetic process);GO:0015…	NA	NA	NA	oxysterol binding protein like 3 [Source:HGNC Symbol;Acc:HGNC:16370]	0	0	0	0.099865	-inf	-inf	1	1
chr12	-	66349179	66372341	ENST00000535323	retained_intron	3	863	ENSG00000155974	GRIP1	GO:0016020(membrane);GO:0005783(endoplasmic reticulum);GO:0005886(plasma membrane);GO:0005515(protein binding);GO:0030054(cell junction);GO:0045202(synapse);GO:0045211(postsynaptic membrane);GO:0031410(cytoplasmic vesicle);GO:0003713(transcription coactivator activity);GO:0045893(positive regulation of transcription, DNA-templated);GO:0030159(receptor signaling complex scaffold activity);GO:00058…	NA	NA	NA	glutamate receptor interacting protein 1 [Source:HGNC Symbol;Acc:HGNC:18708]	0	0	0.170328	0	-inf	-inf	1	1
chr22	-	21203454	21203631	ENST00000639755	transcribed_unprocessed_pseudogene	1	178	ENSG00000283972	AP000550.4	NA	NA	NA	NA	NA	0	0	0.005641	0	-inf	-inf	1	1
chr11	-	64874478	64888296	ENST00000457202	protein_coding	3	534	ENSG00000110047	EHD1	GO:0042632(cholesterol homeostasis);GO:0006810(transport);GO:0016020(membrane);GO:0015031(protein transport);GO:0005525(GTP binding);GO:0046872(metal ion binding);GO:0000166(nucleotide binding);GO:0005524(ATP binding);GO:0005509(calcium ion binding);GO:0005886(plasma membrane);GO:0042995(cell projection);GO:0005515(protein binding);GO:0006886(intracellular protein transport);GO:0042802(identical …	04144(Endocytosis)	NA	NA	EH domain containing 1 [Source:HGNC Symbol;Acc:HGNC:3242]	0	0	0.862271	0	-inf	-inf	1	1
chr7	-	95411730	95435009	ENST00000493290	protein_coding	6	550	ENSG00000105854	PON2	GO:0005576(extracellular region);GO:0004064(arylesterase activity);GO:0016020(membrane);GO:0046872(metal ion binding);GO:0016787(hydrolase activity);GO:0005886(plasma membrane);GO:0042802(identical protein binding);GO:0019372(lipoxygenase pathway);GO:0009636(response to toxic substance);GO:0102007(acyl-L-homoserine-lactone lactonohydrolase activity);GO:0019439(aromatic compound catabolic process)…	NA	NA	NA	paraoxonase 2 [Source:HGNC Symbol;Acc:HGNC:9205]	0	0	0	0.073673	-inf	-inf	1	1
chrX	+	154764927	154768358	ENST00000437719	protein_coding	7	686	ENSG00000130826	DKC1	GO:0003723(RNA binding);GO:0006396(RNA processing);GO:0005634(nucleus);GO:0005737(cytoplasm);GO:0016853(isomerase activity);GO:0030529(intracellular ribonucleoprotein complex);GO:0001650(fibrillar center);GO:0005515(protein binding);GO:0009982(pseudouridine synthase activity);GO:0001522(pseudouridine synthesis);GO:0009451(RNA modification);GO:0042254(ribosome biogenesis);GO:0005730(nucleolus);GO:…	03008(Ribosome biogenesis in eukaryotes)	NA	NA	dyskerin pseudouridine synthase 1 [Source:HGNC Symbol;Acc:HGNC:2890]	0	0	5.46227	0.267164	-inf	-inf	1	1
chr19	-	36319751	36331708	ENST00000438368	lincRNA	6	1863	ENSG00000232677	LINC00665	NA	NA	NA	NA	long intergenic non-protein coding RNA 665 [Source:HGNC Symbol;Acc:HGNC:44323]	0	0	0	0.0371	-inf	-inf	1	1
chr4	-	15968226	16076118	ENST00000540805	protein_coding	26	3908	ENSG00000007062	PROM1	GO:0016020(membrane);GO:0016021(integral component of membrane);GO:0005783(endoplasmic reticulum);GO:0005886(plasma membrane);GO:0042995(cell projection);GO:0005515(protein binding);GO:0005615(extracellular space);GO:0005929(cilium);GO:0045296(cadherin binding);GO:0070062(extracellular exosome);GO:0010842(retina layer formation);GO:0001750(photoreceptor outer segment);GO:0005887(integral componen…	05202(Transcriptional misregulation in cancers)	K06532	NA	prominin 1 [Source:HGNC Symbol;Acc:HGNC:9454]	0	0	0.313385	0	-inf	-inf	1	1
chr11	+	66975277	66977004	ENST00000308963	protein_coding	2	1187	ENSG00000173237	C11orf86	NA	NA	NA	NA	chromosome 11 open reading frame 86 [Source:HGNC Symbol;Acc:HGNC:34442]	0	0	0.023854	0	-inf	-inf	1	1
chr6	-	116244187	116244728	ENST00000457319	antisense_RNA	2	421	ENSG00000236326	AL050331.2	NA	NA	NA	NA	NA	0	0	0.019536	0.031179	-inf	-inf	1	1
chr9	+	136953634	136955426	ENST00000466277	processed_transcript	3	781	ENSG00000184925	LCN12	GO:0006810(transport);GO:0005215(transporter activity);GO:0006629(lipid metabolic process);GO:0005576(extracellular region);GO:0001972(retinoic acid binding);GO:0015909(long-chain fatty acid transport)	NA	NA	NA	lipocalin 12 [Source:HGNC Symbol;Acc:HGNC:28733]	0	0	0	0.274136	-inf	-inf	1	1
chr11	+	4378282	4379209	ENST00000314715	unitary_pseudogene	1	928	ENSG00000175800	OR52B3P	NA	NA	NA	NA	olfactory receptor family 52 subfamily B member 3 pseudogene [Source:HGNC Symbol;Acc:HGNC:15208]	0	0	0.091533	0	-inf	-inf	1	1
chr20	-	32704474	32743406	ENST00000474815	protein_coding	7	488	ENSG00000149600	COMMD7	GO:0043231(intracellular membrane-bounded organelle);GO:0006351(transcription, DNA-templated);GO:0006355(regulation of transcription, DNA-templated);GO:0005515(protein binding);GO:0031410(cytoplasmic vesicle);GO:0070062(extracellular exosome);GO:0032088(negative regulation of NF-kappaB transcription factor activity);GO:0045892(negative regulation of transcription, DNA-templated);GO:0033209(tumor …	NA	NA	NA	COMM domain containing 7 [Source:HGNC Symbol;Acc:HGNC:16223]	0	0	0	0.022252	-inf	-inf	1	1
chrX	-	153592612	153600045	ENST00000482182	protein_coding	4	578	ENSG00000262919	FAM58A	GO:0005515(protein binding);GO:0032147(activation of protein kinase activity);GO:0005634(nucleus);GO:0045944(positive regulation of transcription from RNA polymerase II promoter);GO:0016538(cyclin-dependent protein serine/threonine kinase regulator activity);GO:0045737(positive regulation of cyclin-dependent protein serine/threonine kinase activity);GO:1901409(positive regulation of phosphorylati…	NA	NA	NA	family with sequence similarity 58 member A [Source:HGNC Symbol;Acc:HGNC:28434]	0	0	0.322516	0	-inf	-inf	1	1
chr2	-	98826988	98869362	ENST00000423771	protein_coding	6	1017	ENSG00000196872	KIAA1211L	NA	NA	NA	NA	KIAA1211 like [Source:HGNC Symbol;Acc:HGNC:33454]	0	0	0	0.013517	-inf	-inf	1	1
chrX	+	1403510	1414024	ENST00000602357	antisense_RNA	3	435	ENSG00000236017	ASMTL-AS1	NA	NA	NA	NA	ASMTL antisense RNA 1 [Source:HGNC Symbol;Acc:HGNC:25811]	0	0	0.635726	0	-inf	-inf	1	1
chr9	+	41073735	41076392	ENST00000458364	lincRNA	2	536	ENSG00000225655	BX255923.1	NA	NA	NA	NA	NA	0	0	0.045707	0	-inf	-inf	1	1
chr9	+	2087022	2087350	ENST00000636969	processed_transcript	2	100	ENSG00000080503	SMARCA2	GO:0016514(SWI/SNF complex);GO:0016887(ATPase activity);GO:0006338(chromatin remodeling);GO:0045944(positive regulation of transcription from RNA polymerase II promoter);GO:0005634(nucleus);GO:0043231(intracellular membrane-bounded organelle);GO:0000166(nucleotide binding);GO:0005524(ATP binding);GO:0005654(nucleoplasm);GO:0006355(regulation of transcription, DNA-templated);GO:0016787(hydrolase a…	05225(Hepatocellular carcinoma)	NA	NA	SWI/SNF related, matrix associated, actin dependent regulator of chromatin, subfamily a, member 2 [Source:HGNC Symbol;Acc:HGNC:11098]	0	0	0	0.194049	-inf	-inf	1	1
chr2	-	24286323	24360509	ENST00000412011	protein_coding	17	2066	ENSG00000198399	ITSN2	GO:0005737(cytoplasm);GO:0046872(metal ion binding);GO:0005509(calcium ion binding);GO:0006897(endocytosis);GO:0009967(positive regulation of signal transduction);GO:0005089(Rho guanyl-nucleotide exchange factor activity);GO:0035023(regulation of Rho protein signal transduction);GO:0043547(positive regulation of GTPase activity);GO:0005515(protein binding);GO:0030154(cell differentiation);GO:0070…	NA	NA	NA	intersectin 2 [Source:HGNC Symbol;Acc:HGNC:6184]	0	0	0.008323	0	-inf	-inf	1	1
chr1	+	246772301	246775772	ENST00000567832	lincRNA	1	3472	ENSG00000260855	AL591848.4	NA	NA	NA	NA	NA	0	0	0.025448	0	-inf	-inf	1	1
chr6	-	11248933	11382338	ENST00000468612	retained_intron	4	809	ENSG00000111859	NEDD9	GO:0005634(nucleus);GO:0005737(cytoplasm);GO:0005829(cytosol);GO:0005654(nucleoplasm);GO:0007155(cell adhesion);GO:0005794(Golgi apparatus);GO:0051301(cell division);GO:0005886(plasma membrane);GO:0005856(cytoskeleton);GO:0042995(cell projection);GO:0005515(protein binding);GO:0007049(cell cycle);GO:0030054(cell junction);GO:0007229(integrin-mediated signaling pathway);GO:0005925(focal adhesion);…	NA	NA	NA	neural precursor cell expressed, developmentally down-regulated 9 [Source:HGNC Symbol;Acc:HGNC:7733]	0	0	0	0.027373	-inf	-inf	1	1
chr4	-	1166937	1208962	ENST00000617421	protein_coding	8	2156	ENSG00000159674	SPON2	GO:0046872(metal ion binding);GO:0007155(cell adhesion);GO:0005515(protein binding);GO:0005576(extracellular region);GO:0005578(proteinaceous extracellular matrix);GO:0002376(immune system process);GO:0045087(innate immune response);GO:0070062(extracellular exosome);GO:0007411(axon guidance);GO:0001530(lipopolysaccharide binding);GO:0003823(antigen binding);GO:0002448(mast cell mediated immunity)…	NA	NA	NA	spondin 2 [Source:HGNC Symbol;Acc:HGNC:11253]	0	0	0.078725	0.085822	-inf	-inf	1	1
chrX	-	119466424	119469098	ENST00000445759	lincRNA	2	1616	ENSG00000224281	SLC25A5-AS1	NA	NA	NA	NA	SLC25A5 antisense RNA 1 [Source:HGNC Symbol;Acc:HGNC:43438]	0	0	0.000764	0.001109	-inf	-inf	1	1
chr2	-	217284019	217599932	ENST00000474063	processed_transcript	12	3078	ENSG00000231672	DIRC3	NA	NA	NA	NA	disrupted in renal carcinoma 3 [Source:HGNC Symbol;Acc:HGNC:17805]	0	0	0.019572	0.042113	-inf	-inf	1	1
chr17	+	61245216	61392831	ENST00000592702	processed_transcript	4	2094	ENSG00000141376	BCAS3	GO:0005730(nucleolus);GO:0005634(nucleus);GO:0005737(cytoplasm);GO:0006351(transcription, DNA-templated);GO:0006355(regulation of transcription, DNA-templated);GO:0005856(cytoskeleton);GO:0005515(protein binding);GO:0045944(positive regulation of transcription from RNA polymerase II promoter);GO:2000114(regulation of establishment of cell polarity);GO:0031252(cell leading edge);GO:0043547(positiv…	NA	NA	NA	BCAS3, microtubule associated cell migration factor [Source:HGNC Symbol;Acc:HGNC:14347]	0	0	0.139447	0	-inf	-inf	1	1
chr9	+	34458835	34497199	ENST00000437363	protein_coding	9	1039	ENSG00000122735	DNAI1	GO:0005737(cytoplasm);GO:0005856(cytoskeleton);GO:0042995(cell projection);GO:0005874(microtubule);GO:0003774(motor activity);GO:0005515(protein binding);GO:0030286(dynein complex);GO:0005929(cilium);GO:0030030(cell projection organization);GO:0007368(determination of left/right symmetry);GO:0036158(outer dynein arm assembly);GO:0008574(ATP-dependent microtubule motor activity, plus-end-directed)…	05016(Huntington's disease)	NA	NA	dynein axonemal intermediate chain 1 [Source:HGNC Symbol;Acc:HGNC:2954]	0	0	0	0.110308	-inf	-inf	1	1
chr1	+	222815047	222837229	ENST00000457955	lincRNA	5	385	ENSG00000228106	AL392172.1	NA	NA	NA	NA	NA	0	0	0.006325	0	-inf	-inf	1	1
chr9	-	454304	492248	ENST00000415004	antisense_RNA	4	1081	ENSG00000227155	AL161725.1	NA	NA	NA	NA	NA	0	0	0.022833	0.031094	-inf	-inf	1	1
chr7	+	32732981	32733077	ENST00000384841	miRNA	1	97	ENSG00000207573	MIR550A2	GO:0005615(extracellular space)	NA	NA	NA	microRNA 550a-2 [Source:HGNC Symbol;Acc:HGNC:32805]	0	0	0.035193	0	-inf	-inf	1	1
chr12	-	55954105	55966662	ENST00000552882	protein_coding	12	2516	ENSG00000185664	PMEL	GO:0016020(membrane);GO:0016021(integral component of membrane);GO:0005794(Golgi apparatus);GO:0005783(endoplasmic reticulum);GO:0005789(endoplasmic reticulum membrane);GO:0005576(extracellular region);GO:0042470(melanosome);GO:0005887(integral component of plasma membrane);GO:0005515(protein binding);GO:0005768(endosome);GO:0005886(plasma membrane);GO:0032585(multivesicular body membrane);GO:003…	NA	NA	NA	premelanosome protein [Source:HGNC Symbol;Acc:HGNC:10880]	0	0	0	0.040952	-inf	-inf	1	1
chr6	+	52420207	52482336	ENST00000637892	processed_transcript	10	2635	ENSG00000096093	EFHC1	GO:0005509(calcium ion binding);GO:0005737(cytoplasm);GO:0005856(cytoskeleton);GO:0005515(protein binding);GO:0005813(centrosome);GO:0005815(microtubule organizing center);GO:0005819(spindle);GO:0005930(axoneme);GO:0008022(protein C-terminus binding);GO:0043025(neuronal cell body);GO:0072686(mitotic spindle);GO:0021795(cerebral cortex cell migration)	NA	NA	NA	EF-hand domain containing 1 [Source:HGNC Symbol;Acc:HGNC:16406]	0	0	0	0.001474	-inf	-inf	1	1
chr12	+	49366909	49489561	ENST00000548710	protein_coding	4	558	ENSG00000123352	SPATS2	GO:0003723(RNA binding);GO:0005737(cytoplasm);GO:0005829(cytosol)	NA	NA	NA	spermatogenesis associated serine rich 2 [Source:HGNC Symbol;Acc:HGNC:18650]	0	0	3.11465	0.110131	-inf	-inf	1	1
chr2	+	148233348	148330534	ENST00000636948	processed_transcript	2	100	ENSG00000204406	MBD5	GO:0005634(nucleus);GO:0005694(chromosome);GO:0030496(midbody);GO:0007399(nervous system development);GO:0005654(nucleoplasm);GO:0070062(extracellular exosome);GO:0016579(protein deubiquitination);GO:0003682(chromatin binding);GO:0042593(glucose homeostasis);GO:0040014(regulation of multicellular organism growth);GO:0010369(chromocenter);GO:0044708(single-organism behavior);GO:0060399(positive re…	NA	NA	NA	methyl-CpG binding domain protein 5 [Source:HGNC Symbol;Acc:HGNC:20444]	0	0	0	0.086821	-inf	-inf	1	1
chr3	-	63837992	63863799	ENST00000464327	protein_coding	5	459	ENSG00000163634	THOC7	GO:0003723(RNA binding);GO:0006397(mRNA processing);GO:0006810(transport);GO:0008380(RNA splicing);GO:0051028(mRNA transport);GO:0005634(nucleus);GO:0005737(cytoplasm);GO:0016607(nuclear speck);GO:0005829(cytosol);GO:0005515(protein binding);GO:0000445(THO complex part of transcription export complex);GO:0006406(mRNA export from nucleus);GO:0005654(nucleoplasm);GO:0000784(nuclear chromosome, telo…	03013(RNA transport)	NA	NA	THO complex 7 [Source:HGNC Symbol;Acc:HGNC:29874]	0	0	0.24924	0.162267	-inf	-inf	1	1
chr2	+	178723457	178727046	ENST00000590024	antisense_RNA	1	3590	ENSG00000267784	AC010680.1	NA	NA	NA	NA	NA	0	0	0	0.010297	-inf	-inf	1	1
chr4	+	147808926	147809209	ENST00000460609	misc_RNA	1	284	ENSG00000240014	RN7SL254P	NA	NA	NA	NA	RNA, 7SL, cytoplasmic 254, pseudogene [Source:HGNC Symbol;Acc:HGNC:46270]	0	0	0	0.198832	-inf	-inf	1	1
chr20	+	35968590	36030700	ENST00000373973	protein_coding	12	1956	ENSG00000149646	CNBD2	GO:0005737(cytoplasm);GO:0000166(nucleotide binding);GO:0005829(cytosol);GO:0030552(cAMP binding);GO:0007283(spermatogenesis)	NA	NA	NA	cyclic nucleotide binding domain containing 2 [Source:HGNC Symbol;Acc:HGNC:16145]	0	0	0.057286	0	-inf	-inf	1	1
chr1	-	148206596	148228070	ENST00000611452	lincRNA	6	531	ENSG00000227733	AC239809.3	NA	NA	NA	NA	NA	0	0	0	0.009745	-inf	-inf	1	1
chr2	+	210477690	210577493	ENST00000523702	protein_coding	5	546	ENSG00000021826	CPS1	GO:0005634(nucleus);GO:0000166(nucleotide binding);GO:0005524(ATP binding);GO:0005730(nucleolus);GO:0046872(metal ion binding);GO:0003824(catalytic activity);GO:0005739(mitochondrion);GO:0016874(ligase activity);GO:0005515(protein binding);GO:0008152(metabolic process);GO:0006807(nitrogen compound metabolic process);GO:0006508(proteolysis);GO:0004088(carbamoyl-phosphate synthase (glutamine-hydrol…	00910(Nitrogen metabolism);00250(Alanine, aspartate and glutamate metabolism);00220(Arginine biosynthesis)	NA	NA	carbamoyl-phosphate synthase 1 [Source:HGNC Symbol;Acc:HGNC:2323]	0	0	0	0.010919	-inf	-inf	1	1
chr12	-	44875342	44914139	ENST00000551949	protein_coding	4	500	ENSG00000184613	NELL2	GO:0005623(cell);GO:0005509(calcium ion binding);GO:0005515(protein binding);GO:0005576(extracellular region);GO:0070050(neuron cellular homeostasis)	NA	NA	NA	neural EGFL like 2 [Source:HGNC Symbol;Acc:HGNC:7751]	0	0	0.070145	0	-inf	-inf	1	1
chr11	+	66409194	66417137	ENST00000533759	lincRNA	4	948	ENSG00000254510	AP001107.5	NA	NA	NA	NA	NA	0	0	0.057553	0	-inf	-inf	1	1
chr7	+	121062765	121261918	ENST00000423795	protein_coding	16	2189	ENSG00000106034	CPED1	GO:0005783(endoplasmic reticulum)	NA	NA	NA	cadherin like and PC-esterase domain containing 1 [Source:HGNC Symbol;Acc:HGNC:26159]	0	0	0.06552	0	-inf	-inf	1	1
chr16	+	58500143	58511670	ENST00000569923	protein_coding	14	1312	ENSG00000103034	NDRG4	GO:0003674(molecular_function);GO:0070374(positive regulation of ERK1 and ERK2 cascade);GO:0005737(cytoplasm);GO:0048662(negative regulation of smooth muscle cell proliferation);GO:0005829(cytosol);GO:0005515(protein binding);GO:0030154(cell differentiation);GO:0005789(endoplasmic reticulum membrane);GO:0035050(embryonic heart tube development);GO:0001947(heart looping);GO:0007420(brain developme…	NA	NA	NA	NDRG family member 4 [Source:HGNC Symbol;Acc:HGNC:14466]	0	0	0.031003	0	-inf	-inf	1	1
chr9	+	130693787	130702293	ENST00000372350	protein_coding	7	606	ENSG00000130713	EXOSC2	GO:0003723(RNA binding);GO:0005634(nucleus);GO:0005737(cytoplasm);GO:0005730(nucleolus);GO:0005515(protein binding);GO:0006364(rRNA processing);GO:0005654(nucleoplasm);GO:0005829(cytosol);GO:0000178(exosome (RNase complex));GO:0043488(regulation of mRNA stability);GO:0030307(positive regulation of cell growth);GO:0043928(exonucleolytic nuclear-transcribed mRNA catabolic process involved in deaden…	03018(RNA degradation)	NA	NA	exosome component 2 [Source:HGNC Symbol;Acc:HGNC:17097]	0	0	0	6.67911	-inf	-inf	1	1
chr22	+	27919440	27986342	ENST00000454996	antisense_RNA	3	837	ENSG00000235954	TTC28-AS1	NA	NA	NA	NA	TTC28 antisense RNA 1 [Source:HGNC Symbol;Acc:HGNC:29336]	0	0	0.000549	0	-inf	-inf	1	1
chr1	+	156284279	156292443	ENST00000405535	protein_coding	4	2201	ENSG00000163472	TMEM79	GO:0016020(membrane);GO:0016021(integral component of membrane);GO:0005794(Golgi apparatus);GO:0005765(lysosomal membrane);GO:0005515(protein binding);GO:0005764(lysosome);GO:0042802(identical protein binding);GO:0070268(cornification);GO:0032588(trans-Golgi network membrane);GO:0061436(establishment of skin barrier);GO:0002070(epithelial cell maturation);GO:0045055(regulated exocytosis);GO:00456…	NA	NA	NA	transmembrane protein 79 [Source:HGNC Symbol;Acc:HGNC:28196]	0	0	0	0.008387	-inf	-inf	1	1
chr15	+	73994717	74036394	ENST00000395132	protein_coding	5	1738	ENSG00000140464	PML	GO:0008285(negative regulation of cell proliferation);GO:0005634(nucleus);GO:0005737(cytoplasm);GO:0016020(membrane);GO:0008270(zinc ion binding);GO:0046872(metal ion binding);GO:0006351(transcription, DNA-templated);GO:0006355(regulation of transcription, DNA-templated);GO:0003677(DNA binding);GO:0005622(intracellular);GO:0005829(cytosol);GO:0005783(endoplasmic reticulum);GO:0005789(endoplasmic …	04120(Ubiquitin mediated proteolysis);04144(Endocytosis);05200(Pathways in cancer);05202(Transcriptional misregulation in cancers);05221(Acute myeloid leukemia);05164(Influenza A);05168(Herpes simplex infection)	K10054	NA	promyelocytic leukemia [Source:HGNC Symbol;Acc:HGNC:9113]	0	0	0	0.016323	-inf	-inf	1	1
chr17	+	15365323	15365877	ENST00000623654	TEC	1	555	ENSG00000279567	AC005703.5	NA	NA	NA	NA	NA	0	0	0	0.00944	-inf	-inf	1	1
chr9	-	122476958	122477926	ENST00000259357	protein_coding	1	969	ENSG00000136834	OR1J1	GO:0016020(membrane);GO:0016021(integral component of membrane);GO:0004930(G-protein coupled receptor activity);GO:0007186(G-protein coupled receptor signaling pathway);GO:0005886(plasma membrane);GO:0004871(signal transducer activity);GO:0007165(signal transduction);GO:0004984(olfactory receptor activity);GO:0007608(sensory perception of smell);GO:0050896(response to stimulus);GO:0050911(detecti…	04740(Olfactory transduction)	K04257	NA	olfactory receptor family 1 subfamily J member 1 [Source:HGNC Symbol;Acc:HGNC:8208]	0	0	0.046939	0	-inf	-inf	1	1
chr22	-	30285146	30289607	ENST00000404953	protein_coding	8	1460	ENSG00000239282	CASTOR1	GO:0005737(cytoplasm);GO:0005829(cytosol);GO:0005515(protein binding);GO:0042802(identical protein binding);GO:1904262(negative regulation of TORC1 signaling);GO:0061700(GATOR2 complex);GO:1903432(regulation of TORC1 signaling);GO:0034618(arginine binding);GO:1903577(cellular response to L-arginine)	NA	NA	NA	cytosolic arginine sensor for mTORC1 subunit 1 [Source:HGNC Symbol;Acc:HGNC:34423]	0	0	0.216978	0	-inf	-inf	1	1
chr2	-	118183021	118186386	ENST00000449819	lincRNA	2	458	ENSG00000226856	AC093901.1	NA	NA	NA	NA	NA	0	0	0	0.054494	-inf	-inf	1	1
chr11	+	108223090	108229272	ENST00000532931	protein_coding	5	481	ENSG00000149311	ATM	GO:0004674(protein serine/threonine kinase activity);GO:0006468(protein phosphorylation);GO:0005634(nucleus);GO:0000166(nucleotide binding);GO:0005524(ATP binding);GO:0016740(transferase activity);GO:0016301(kinase activity);GO:0016310(phosphorylation);GO:0003677(DNA binding);GO:0005515(protein binding);GO:0006974(cellular response to DNA damage stimulus);GO:0007049(cell cycle);GO:0031410(cytopla…	03440(Homologous recombination);04064(NF-kappa B signaling pathway);04068(FoxO signaling pathway);04110(Cell cycle);04210(Apoptosis);04115(p53 signaling pathway);04218(Cellular senescence);05202(Transcriptional misregulation in cancers);05206(MicroRNAs in cancer);05166(HTLV-I infection);05165(Human papillomavirus infection);01524(Platinum drug resistance)	NA	NA	ATM serine/threonine kinase [Source:HGNC Symbol;Acc:HGNC:795]	0	0	0.013585	0	-inf	-inf	1	1
chr4	-	40425412	40630623	ENST00000514014	protein_coding	6	2419	ENSG00000163694	RBM47	GO:0003676(nucleic acid binding);GO:0003723(RNA binding);GO:0005634(nucleus);GO:0002244(hematopoietic progenitor cell differentiation);GO:0016554(cytidine to uridine editing)	NA	NA	NA	RNA binding motif protein 47 [Source:HGNC Symbol;Acc:HGNC:30358]	0	0	0.250028	0.225764	-inf	-inf	1	1
chr7	-	66556889	66557362	ENST00000325130	processed_pseudogene	1	474	ENSG00000177418	AC006001.1	NA	NA	NA	NA	NA	0	0	0	0.081059	-inf	-inf	1	1
chr16	+	566996	569487	ENST00000424439	protein_coding	2	2097	ENSG00000257108	NHLRC4	NA	NA	NA	NA	NHL repeat containing 4 [Source:HGNC Symbol;Acc:HGNC:26700]	0	0	0	0.001078	-inf	-inf	1	1
chr9	+	88535101	88539811	ENST00000618633	protein_coding	3	739	ENSG00000130045	NXNL2	GO:0098869(cellular oxidant detoxification);GO:0005737(cytoplasm);GO:0007600(sensory perception);GO:0045494(photoreceptor cell maintenance);GO:0004791(thioredoxin-disulfide reductase activity);GO:0007601(visual perception);GO:0007608(sensory perception of smell)	NA	NA	NA	nucleoredoxin like 2 [Source:HGNC Symbol;Acc:HGNC:30482]	0	0	0	0.000656	-inf	-inf	1	1
chr2	+	241169798	241183652	ENST00000415769	protein_coding	3	514	ENSG00000115685	PPP1R7	GO:0005634(nucleus);GO:0050790(regulation of catalytic activity);GO:0005515(protein binding);GO:0008150(biological_process);GO:0070062(extracellular exosome);GO:0005737(cytoplasm);GO:0019888(protein phosphatase regulator activity);GO:0030234(enzyme regulator activity);GO:0035307(positive regulation of protein dephosphorylation);GO:0005694(chromosome);GO:0007059(chromosome segregation);GO:0061588(…	NA	NA	NA	protein phosphatase 1 regulatory subunit 7 [Source:HGNC Symbol;Acc:HGNC:9295]	0	0	0.371449	0	-inf	-inf	1	1
chr7	-	6330828	6348975	ENST00000530143	protein_coding	2	558	ENSG00000178397	FAM220A	GO:0005634(nucleus);GO:0097677(STAT family protein binding);GO:0000122(negative regulation of transcription from RNA polymerase II promoter);GO:0006470(protein dephosphorylation);GO:0032092(positive regulation of protein binding)	NA	NA	NA	family with sequence similarity 220 member A [Source:HGNC Symbol;Acc:HGNC:22422]	0	0	0	0.181372	-inf	-inf	1	1
chr7	-	82838218	82879462	ENST00000413807	nonsense_mediated_decay	7	748	ENSG00000186472	PCLO	GO:0016020(membrane);GO:0046872(metal ion binding);GO:0005856(cytoskeleton);GO:0030054(cell junction);GO:0045202(synapse);GO:0005544(calcium-dependent phospholipid binding);GO:0005509(calcium ion binding);GO:0007416(synapse assembly);GO:0048786(presynaptic active zone);GO:0070062(extracellular exosome);GO:0007010(cytoskeleton organization);GO:0016079(synaptic vesicle exocytosis);GO:0005522(profil…	04911(Insulin secretion)	NA	NA	piccolo presynaptic cytomatrix protein [Source:HGNC Symbol;Acc:HGNC:13406]	0	0	0.094921	0	-inf	-inf	1	1
chr19	-	38771884	38773432	ENST00000599035	protein_coding	2	565	ENSG00000205076	LGALS7	GO:0005634(nucleus);GO:0005737(cytoplasm);GO:0005615(extracellular space);GO:0030246(carbohydrate binding);GO:0005576(extracellular region);GO:0006915(apoptotic process);GO:0007157(heterophilic cell-cell adhesion via plasma membrane cell adhesion molecules);GO:0070062(extracellular exosome)	NA	NA	NA	galectin 7 [Source:HGNC Symbol;Acc:HGNC:6568]	0	0	0	0.083973	-inf	-inf	1	1
chr1	+	168938467	168938923	ENST00000440227	processed_pseudogene	1	457	ENSG00000213063	RPL29P7	NA	NA	NA	NA	ribosomal protein L29 pseudogene 7 [Source:HGNC Symbol;Acc:HGNC:36859]	0	0	0.004306	0.003185	-inf	-inf	1	1
chr14	-	50637691	50637981	ENST00000482923	misc_RNA	1	291	ENSG00000243103	RN7SL452P	NA	NA	NA	NA	RNA, 7SL, cytoplasmic 452, pseudogene [Source:HGNC Symbol;Acc:HGNC:46468]	0	0	0.2015	0.101359	-inf	-inf	1	1
chr17	+	20951431	21002276	ENST00000581958	antisense_RNA	6	1188	ENSG00000233098	CCDC144NL-AS1	NA	NA	NA	NA	CCDC144NL antisense RNA 1 [Source:HGNC Symbol;Acc:HGNC:51340]	0	0	1.1e-05	0	-inf	-inf	1	1
chr9	+	91182057	91182717	ENST00000421595	lincRNA	2	534	ENSG00000229694	LINC00484	NA	NA	NA	NA	long intergenic non-protein coding RNA 484 [Source:NCBI gene;Acc:100129347]	0	0	0.04663	0	-inf	-inf	1	1
chr7	+	87627548	87741537	ENST00000466676	processed_transcript	7	582	ENSG00000105784	RUNDC3B	NA	NA	NA	NA	RUN domain containing 3B [Source:HGNC Symbol;Acc:HGNC:30286]	0	0	0.049796	0	-inf	-inf	1	1
chr1	+	204870604	204945032	ENST00000493914	processed_transcript	4	683	ENSG00000163531	NFASC	GO:0016020(membrane);GO:0016021(integral component of membrane);GO:0007155(cell adhesion);GO:0005886(plasma membrane);GO:0007411(axon guidance);GO:0050808(synapse organization);GO:0005925(focal adhesion);GO:0007422(peripheral nervous system development);GO:0019226(transmission of nerve impulse);GO:0042552(myelination);GO:0005515(protein binding);GO:0070062(extracellular exosome);GO:0043312(neutro…	04514(Cell adhesion molecules (CAMs))	NA	NA	neurofascin [Source:HGNC Symbol;Acc:HGNC:29866]	0	0	0.080265	0	-inf	-inf	1	1
chr9	-	116437223	116440735	ENST00000417725	protein_coding	3	395	ENSG00000148219	ASTN2	GO:0006810(transport);GO:0005737(cytoplasm);GO:0016020(membrane);GO:0016021(integral component of membrane);GO:0015031(protein transport);GO:0046872(metal ion binding);GO:0031410(cytoplasmic vesicle);GO:0005509(calcium ion binding);GO:0005768(endosome);GO:0043204(perikaryon);GO:0005938(cell cortex);GO:0005769(early endosome);GO:0005770(late endosome);GO:0030136(clathrin-coated vesicle);GO:0043533…	NA	NA	NA	astrotactin 2 [Source:HGNC Symbol;Acc:HGNC:17021]	0	0	0.078887	0	-inf	-inf	1	1
chr1	+	209756032	209779655	ENST00000400959	protein_coding	14	1854	ENSG00000009790	TRAF3IP3	GO:0016020(membrane);GO:0016021(integral component of membrane);GO:0005515(protein binding)	NA	NA	NA	TRAF3 interacting protein 3 [Source:HGNC Symbol;Acc:HGNC:30766]	0	0	0	0.000108	-inf	-inf	1	1
chr1	+	154480012	154481501	ENST00000607963	antisense_RNA	2	681	ENSG00000273110	AL162591.3	NA	NA	NA	NA	NA	0	0	0	0.030842	-inf	-inf	1	1
chr5	+	55160167	55164131	ENST00000511617	processed_transcript	4	425	ENSG00000164294	GPX8	GO:0016020(membrane);GO:0016021(integral component of membrane);GO:0016491(oxidoreductase activity);GO:0055114(oxidation-reduction process);GO:0098869(cellular oxidant detoxification);GO:0004601(peroxidase activity);GO:0004602(glutathione peroxidase activity);GO:0006979(response to oxidative stress);GO:0005788(endoplasmic reticulum lumen);GO:0034599(cellular response to oxidative stress)	00590(Arachidonic acid metabolism);00480(Glutathione metabolism);04918(Thyroid hormone synthesis)	NA	NA	glutathione peroxidase 8 (putative) [Source:HGNC Symbol;Acc:HGNC:33100]	0	0	0.008012	0.007164	-inf	-inf	1	1
chr3	-	49076707	49094363	ENST00000411682	protein_coding	2	359	ENSG00000198218	QRICH1	GO:0005654(nucleoplasm);GO:0005515(protein binding);GO:0006357(regulation of transcription from RNA polymerase II promoter);GO:0005737(cytoplasm);GO:0003674(molecular_function);GO:0008150(biological_process);GO:0005575(cellular_component);GO:0000981(RNA polymerase II transcription factor activity, sequence-specific DNA binding);GO:0007275(multicellular organism development);GO:0003677(DNA binding…	NA	NA	NA	glutamine rich 1 [Source:HGNC Symbol;Acc:HGNC:24713]	0	0	0	0.335919	-inf	-inf	1	1
chr11	-	111908646	111913197	ENST00000531198	protein_coding	5	1013	ENSG00000109846	CRYAB	GO:0005634(nucleus);GO:0005737(cytoplasm);GO:0046872(metal ion binding);GO:0042803(protein homodimerization activity);GO:0005515(protein binding);GO:0005212(structural constituent of eye lens);GO:0042802(identical protein binding);GO:0005654(nucleoplasm);GO:0070062(extracellular exosome);GO:0006936(muscle contraction);GO:0051082(unfolded protein binding);GO:1900034(regulation of cellular response…	04141(Protein processing in endoplasmic reticulum);04213(Longevity regulating pathway - multiple species)	NA	NA	crystallin alpha B [Source:HGNC Symbol;Acc:HGNC:2389]	0	0	0.025242	0	-inf	-inf	1	1
chr1	-	153457744	153460701	ENST00000368723	protein_coding	3	479	ENSG00000143556	S100A7	GO:0005634(nucleus);GO:0005737(cytoplasm);GO:0046872(metal ion binding);GO:0005509(calcium ion binding);GO:0005829(cytosol);GO:0005783(endoplasmic reticulum);GO:0008270(zinc ion binding);GO:0005515(protein binding);GO:0005576(extracellular region);GO:0005615(extracellular space);GO:0045087(innate immune response);GO:0005925(focal adhesion);GO:0046914(transition metal ion binding);GO:0070062(extra…	04657(IL-17 signaling pathway)	K21126	NA	S100 calcium binding protein A7 [Source:HGNC Symbol;Acc:HGNC:10497]	0	0	0.303102	0	-inf	-inf	1	1
chr2	-	161993283	162074122	ENST00000434918	nonsense_mediated_decay	27	2674	ENSG00000197635	DPP4	GO:0016020(membrane);GO:0016021(integral component of membrane);GO:0016787(hydrolase activity);GO:0007155(cell adhesion);GO:0005765(lysosomal membrane);GO:0042803(protein homodimerization activity);GO:0005886(plasma membrane);GO:0042995(cell projection);GO:0005515(protein binding);GO:0008233(peptidase activity);GO:0006508(proteolysis);GO:0005576(extracellular region);GO:0004252(serine-type endope…	04974(Protein digestion and absorption)	NA	NA	dipeptidyl peptidase 4 [Source:HGNC Symbol;Acc:HGNC:3009]	0	0	0.008171	0.017773	-inf	-inf	1	1
chr16	+	72429353	72533892	ENST00000624327	lincRNA	2	1645	ENSG00000260664	AC004158.1	NA	NA	NA	NA	NA	0	0	0.073732	0.060869	-inf	-inf	1	1
chr17	+	47863342	47865190	ENST00000581213	lincRNA	2	816	ENSG00000264243	AC018521.3	NA	NA	NA	NA	NA	0	0	0	0.111412	-inf	-inf	1	1
chr22	-	31155966	31156647	ENST00000397595	processed_pseudogene	1	682	ENSG00000214125	AC005005.1	NA	NA	NA	NA	NA	0	0	0.009569	0.128892	-inf	-inf	1	1
chr7	-	13339201	13365049	ENST00000456809	lincRNA	5	842	ENSG00000237713	AC011287.2	NA	NA	NA	NA	NA	0	0	0	0.026273	-inf	-inf	1	1
chr3	+	4799795	4846463	ENST00000493491	processed_transcript	10	1793	ENSG00000150995	ITPR1	GO:0006810(transport);GO:0005737(cytoplasm);GO:0016020(membrane);GO:0016021(integral component of membrane);GO:0055085(transmembrane transport);GO:0005216(ion channel activity);GO:0006811(ion transport);GO:0005783(endoplasmic reticulum);GO:0005789(endoplasmic reticulum membrane);GO:0005515(protein binding);GO:0007165(signal transduction);GO:0006915(apoptotic process);GO:0006816(calcium ion transp…	04371(Apelin signaling pathway);04020(Calcium signaling pathway);04070(Phosphatidylinositol signaling system);04022(cGMP - PKG signaling pathway);04140(Autophagy - animal);04114(Oocyte meiosis);04210(Apoptosis);04218(Cellular senescence);04540(Gap junction);04611(Platelet activation);04621(NOD-like receptor signaling pathway);04922(Glucagon signaling pathway);04912(GnRH signaling pathway);04915(E…	NA	NA	inositol 1,4,5-trisphosphate receptor type 1 [Source:HGNC Symbol;Acc:HGNC:6180]	0	0	0	0.839747	-inf	-inf	1	1
chr1	-	156936816	156939740	ENST00000492592	processed_transcript	5	864	ENSG00000132694	ARHGEF11	GO:0005737(cytoplasm);GO:0016020(membrane);GO:0007186(G-protein coupled receptor signaling pathway);GO:0005089(Rho guanyl-nucleotide exchange factor activity);GO:0035023(regulation of Rho protein signal transduction);GO:0043547(positive regulation of GTPase activity);GO:0005515(protein binding);GO:0005096(GTPase activator activity);GO:0045893(positive regulation of transcription, DNA-templated);G…	04270(Vascular smooth muscle contraction);05200(Pathways in cancer)	NA	NA	Rho guanine nucleotide exchange factor 11 [Source:HGNC Symbol;Acc:HGNC:14580]	0	0	0	0.031008	-inf	-inf	1	1
chr15	-	37094516	37096191	ENST00000559129	retained_intron	3	552	ENSG00000134138	MEIS2	GO:0005634(nucleus);GO:0005737(cytoplasm);GO:0006355(regulation of transcription, DNA-templated);GO:0006351(transcription, DNA-templated);GO:0003677(DNA binding);GO:0005515(protein binding);GO:0007275(multicellular organism development);GO:0048471(perinuclear region of cytoplasm);GO:0000978(RNA polymerase II core promoter proximal region sequence-specific DNA binding);GO:0045944(positive regulati…	NA	NA	NA	Meis homeobox 2 [Source:HGNC Symbol;Acc:HGNC:7001]	0	0	0	0.011172	-inf	-inf	1	1
chr14	-	59969116	60057651	ENST00000555432	antisense_RNA	4	491	ENSG00000258553	AL157911.1	NA	NA	NA	NA	NA	0	0	0.063519	0	-inf	-inf	1	1
chr2	-	186641339	186695287	ENST00000453665	antisense_RNA	3	571	ENSG00000227227	AC017101.1	NA	NA	NA	NA	NA	0	0	0	0.11455	-inf	-inf	1	1
chr17	+	80415452	80438086	ENST00000517795	protein_coding	7	2548	ENSG00000173818	ENDOV	GO:0004519(endonuclease activity);GO:0006281(DNA repair);GO:0090305(nucleic acid phosphodiester bond hydrolysis);GO:0003723(RNA binding);GO:0005634(nucleus);GO:0005737(cytoplasm);GO:0046872(metal ion binding);GO:0016787(hydrolase activity);GO:0003677(DNA binding);GO:0090502(RNA phosphodiester bond hydrolysis, endonucleolytic);GO:0000287(magnesium ion binding);GO:0004518(nuclease activity);GO:0005…	NA	NA	NA	endonuclease V [Source:HGNC Symbol;Acc:HGNC:26640]	0	0	0.200576	0.107449	-inf	-inf	1	1
chr6	-	107509803	107511436	ENST00000441532	antisense_RNA	3	338	ENSG00000234206	AL121957.1	NA	NA	NA	NA	NA	0	0	0	0.12721	-inf	-inf	1	1
chr8	-	140752232	140771444	ENST00000521172	processed_transcript	6	507	ENSG00000169398	PTK2	GO:0030335(positive regulation of cell migration);GO:0005634(nucleus);GO:0005737(cytoplasm);GO:0016020(membrane);GO:0000166(nucleotide binding);GO:0004672(protein kinase activity);GO:0005524(ATP binding);GO:0006468(protein phosphorylation);GO:0005829(cytosol);GO:0016740(transferase activity);GO:0016301(kinase activity);GO:0016310(phosphorylation);GO:0004871(signal transducer activity);GO:0004713(…	04012(ErbB signaling pathway);04370(VEGF signaling pathway);04151(PI3K-Akt signaling pathway);04510(Focal adhesion);04810(Regulation of actin cytoskeleton);04670(Leukocyte transendothelial migration);04062(Chemokine signaling pathway);04360(Axon guidance);05200(Pathways in cancer);05202(Transcriptional misregulation in cancers);05205(Proteoglycans in cancer);05222(Small cell lung cancer);05418(Fl…	NA	NA	protein tyrosine kinase 2 [Source:HGNC Symbol;Acc:HGNC:9611]	0	0	0.172351	0	-inf	-inf	1	1
chr1	+	53196903	53214170	ENST00000638135	nonsense_mediated_decay	3	2405	ENSG00000157184	CPT2	GO:0006810(transport);GO:0016020(membrane);GO:0005730(nucleolus);GO:0005654(nucleoplasm);GO:0016740(transferase activity);GO:0005739(mitochondrion);GO:0005743(mitochondrial inner membrane);GO:0016746(transferase activity, transferring acyl groups);GO:0006629(lipid metabolic process);GO:0006631(fatty acid metabolic process);GO:0006853(carnitine shuttle);GO:0006635(fatty acid beta-oxidation);GO:001…	00071(Fatty acid degradation);03320(PPAR signaling pathway)	NA	NA	carnitine palmitoyltransferase 2 [Source:HGNC Symbol;Acc:HGNC:2330]	0	0	0	3.49539	-inf	-inf	1	1
chr6	+	41638477	41653639	ENST00000373050	protein_coding	4	809	ENSG00000112559	MDFI	GO:0005634(nucleus);GO:0005737(cytoplasm);GO:0005515(protein binding);GO:0007275(multicellular organism development);GO:0030154(cell differentiation);GO:0042802(identical protein binding);GO:0000122(negative regulation of transcription from RNA polymerase II promoter);GO:0008134(transcription factor binding);GO:0030178(negative regulation of Wnt signaling pathway);GO:0045892(negative regulation o…	NA	NA	NA	MyoD family inhibitor [Source:HGNC Symbol;Acc:HGNC:6967]	0	0	0.202705	0.136741	-inf	-inf	1	1
chrX	+	155489323	155611616	ENST00000452506	antisense_RNA	2	210	ENSG00000224533	TMLHE-AS1	NA	NA	NA	NA	TMLHE antisense RNA 1 [Source:HGNC Symbol;Acc:HGNC:44261]	0	0	0	0.146954	-inf	-inf	1	1
chrX	-	153871128	153876039	ENST00000439496	protein_coding	5	655	ENSG00000198910	L1CAM	GO:0016020(membrane);GO:0016021(integral component of membrane);GO:0007155(cell adhesion);GO:0005886(plasma membrane);GO:0042995(cell projection);GO:0007275(multicellular organism development);GO:0007399(nervous system development);GO:0030154(cell differentiation);GO:0005925(focal adhesion);GO:0030425(dendrite);GO:0050900(leukocyte migration);GO:0030424(axon);GO:0045773(positive regulation of axo…	04514(Cell adhesion molecules (CAMs));04360(Axon guidance)	NA	NA	L1 cell adhesion molecule [Source:HGNC Symbol;Acc:HGNC:6470]	0	0	0	0.243622	-inf	-inf	1	1
chr19	+	35139441	35143050	ENST00000455515	protein_coding	8	594	ENSG00000266964	FXYD1	GO:0008016(regulation of heart contraction);GO:0006810(transport);GO:0016020(membrane);GO:0016021(integral component of membrane);GO:0005216(ion channel activity);GO:0006811(ion transport);GO:0005901(caveola);GO:0005254(chloride channel activity);GO:0006821(chloride transport);GO:0034707(chloride channel complex);GO:1902476(chloride transmembrane transport);GO:0005886(plasma membrane);GO:0017080(…	04024(cAMP signaling pathway)	K13360	NA	FXYD domain containing ion transport regulator 1 [Source:HGNC Symbol;Acc:HGNC:4025]	0	0	1.36117	0	-inf	-inf	1	1
chr8	-	143589838	143597415	ENST00000525261	protein_coding	3	559	ENSG00000104529	EEF1D	GO:0005634(nucleus);GO:0005737(cytoplasm);GO:0006412(translation);GO:0005829(cytosol);GO:0006351(transcription, DNA-templated);GO:0006355(regulation of transcription, DNA-templated);GO:0003677(DNA binding);GO:0001650(fibrillar center);GO:0005783(endoplasmic reticulum);GO:0005515(protein binding);GO:0004871(signal transducer activity);GO:0003746(translation elongation factor activity);GO:0006414(t…	05168(Herpes simplex infection)	NA	NA	eukaryotic translation elongation factor 1 delta [Source:HGNC Symbol;Acc:HGNC:3211]	0	0	0.502124	0.371935	-inf	-inf	1	1
chr3	-	139560192	139677965	ENST00000413939	protein_coding	4	1711	ENSG00000163864	NMNAT3	GO:0016740(transferase activity);GO:0003824(catalytic activity);GO:0009058(biosynthetic process);GO:0016779(nucleotidyltransferase activity);GO:0000166(nucleotide binding);GO:0005524(ATP binding);GO:0005739(mitochondrion);GO:0000309(nicotinamide-nucleotide adenylyltransferase activity);GO:0004515(nicotinate-nucleotide adenylyltransferase activity);GO:0009435(NAD biosynthetic process);GO:0019363(p…	00760(Nicotinate and nicotinamide metabolism)	K06210	EC:2.7.7.1 2.7.7.18	nicotinamide nucleotide adenylyltransferase 3 [Source:HGNC Symbol;Acc:HGNC:20989]	0	0	0	0.201957	-inf	-inf	1	1
chr19	+	17228256	17229215	ENST00000600826	protein_coding	3	348	ENSG00000099330	OCEL1	GO:0016020(membrane);GO:0016021(integral component of membrane)	NA	NA	NA	occludin/ELL domain containing 1 [Source:HGNC Symbol;Acc:HGNC:26221]	0	0	0.134627	0	-inf	-inf	1	1
chr2	-	113218522	113241779	ENST00000497038	protein_coding	6	816	ENSG00000125618	PAX8	GO:0005634(nucleus);GO:0005654(nucleoplasm);GO:0006355(regulation of transcription, DNA-templated);GO:0006366(transcription from RNA polymerase II promoter);GO:0006351(transcription, DNA-templated);GO:0003677(DNA binding);GO:0003700(transcription factor activity, sequence-specific DNA binding);GO:0005515(protein binding);GO:0007275(multicellular organism development);GO:0030154(cell differentiati…	04918(Thyroid hormone synthesis);05200(Pathways in cancer);05202(Transcriptional misregulation in cancers);05216(Thyroid cancer)	NA	NA	paired box 8 [Source:HGNC Symbol;Acc:HGNC:8622]	0	0	1.06115	0	-inf	-inf	1	1
chr7	-	85050357	85186855	ENST00000444867	protein_coding	10	1605	ENSG00000153993	SEMA3D	GO:0005576(extracellular region);GO:0007275(multicellular organism development);GO:0007399(nervous system development);GO:0030154(cell differentiation);GO:0005615(extracellular space);GO:0038191(neuropilin binding);GO:0050919(negative chemotaxis);GO:0016020(membrane);GO:0016021(integral component of membrane)	04360(Axon guidance)	NA	NA	semaphorin 3D [Source:HGNC Symbol;Acc:HGNC:10726]	0	0	0.044103	0.0204	-inf	-inf	1	1
chr7	-	126438615	127252381	ENST00000358373	protein_coding	11	3850	ENSG00000179603	GRM8	GO:0016020(membrane);GO:0016021(integral component of membrane);GO:0004930(G-protein coupled receptor activity);GO:0007186(G-protein coupled receptor signaling pathway);GO:0005886(plasma membrane);GO:0004871(signal transducer activity);GO:0007165(signal transduction);GO:0007608(sensory perception of smell);GO:0050896(response to stimulus);GO:0005887(integral component of plasma membrane);GO:00076…	04072(Phospholipase D signaling pathway);04080(Neuroactive ligand-receptor interaction);04724(Glutamatergic synapse)	K04608	NA	glutamate metabotropic receptor 8 [Source:HGNC Symbol;Acc:HGNC:4600]	0	0	0	0.006892	-inf	-inf	1	1
chr17	+	32022290	32028945	ENST00000581786	processed_transcript	4	792	ENSG00000185158	LRRC37B	GO:0016020(membrane);GO:0016021(integral component of membrane)	NA	NA	NA	leucine rich repeat containing 37B [Source:HGNC Symbol;Acc:HGNC:29070]	0	0	0	0.019601	-inf	-inf	1	1
chrX	-	135075136	135076597	ENST00000416078	processed_pseudogene	1	1462	ENSG00000234228	NCLP2	NA	NA	NA	NA	nucleolin pseudogene 2 [Source:HGNC Symbol;Acc:HGNC:35473]	0	0	0	0.012344	-inf	-inf	1	1
chr7	+	134779420	134968859	ENST00000422748	protein_coding	15	2665	ENSG00000122786	CALD1	GO:0005737(cytoplasm);GO:0043231(intracellular membrane-bounded organelle);GO:0003779(actin binding);GO:0005886(plasma membrane);GO:0015629(actin cytoskeleton);GO:0005856(cytoskeleton);GO:0005515(protein binding);GO:0005516(calmodulin binding);GO:0017022(myosin binding);GO:0006936(muscle contraction);GO:0005829(cytosol);GO:0045296(cadherin binding);GO:0030016(myofibril);GO:0006928(movement of cel…	04270(Vascular smooth muscle contraction)	K12327	NA	caldesmon 1 [Source:HGNC Symbol;Acc:HGNC:1441]	0	0	1.80312	0	-inf	-inf	1	1
chr17	-	18971068	19004238	ENST00000345041	protein_coding	6	2929	ENSG00000188522	FAM83G	GO:0005634(nucleus);GO:0005737(cytoplasm);GO:0005829(cytosol);GO:0005515(protein binding);GO:0030509(BMP signaling pathway)	NA	NA	NA	family with sequence similarity 83 member G [Source:HGNC Symbol;Acc:HGNC:32554]	0	0	0.183046	0.000629	-inf	-inf	1	1
chr3	-	48549961	48550021	ENST00000622118	miRNA	1	61	ENSG00000278799	MIR6823	NA	NA	NA	NA	microRNA 6823 [Source:HGNC Symbol;Acc:HGNC:49952]	0	0	0	0.143151	-inf	-inf	1	1
chr6	-	31156838	31158160	ENST00000507892	protein_coding	4	479	ENSG00000204536	CCHCR1	GO:0005634(nucleus);GO:0005737(cytoplasm);GO:0005829(cytosol);GO:0030154(cell differentiation);GO:0007275(multicellular organism development);GO:0005814(centriole);GO:0006611(protein export from nucleus)	NA	NA	NA	coiled-coil alpha-helical rod protein 1 [Source:HGNC Symbol;Acc:HGNC:13930]	0	0	0.132373	0	-inf	-inf	1	1
chrX	+	28942050	28942568	ENST00000424251	sense_intronic	2	465	ENSG00000237994	AC003659.1	NA	NA	NA	NA	NA	0	0	0	0.07595	-inf	-inf	1	1
chr14	-	39094898	39103233	ENST00000557280	protein_coding	3	561	ENSG00000100934	SEC23A	GO:0006810(transport);GO:0016020(membrane);GO:0006886(intracellular protein transport);GO:0015031(protein transport);GO:0008270(zinc ion binding);GO:0005794(Golgi apparatus);GO:0006888(ER to Golgi vesicle-mediated transport);GO:0030127(COPII vesicle coat);GO:0005829(cytosol);GO:0005783(endoplasmic reticulum);GO:0005515(protein binding);GO:0000139(Golgi membrane);GO:0016192(vesicle-mediated transp…	04141(Protein processing in endoplasmic reticulum)	NA	NA	Sec23 homolog A, coat complex II component [Source:HGNC Symbol;Acc:HGNC:10701]	0	0	0.735324	0	-inf	-inf	1	1
chr2	+	68467603	68580162	ENST00000445692	nonsense_mediated_decay	11	3906	ENSG00000169621	APLF	GO:0005634(nucleus);GO:0005737(cytoplasm);GO:0046872(metal ion binding);GO:0000166(nucleotide binding);GO:0005654(nucleoplasm);GO:0016829(lyase activity);GO:0005829(cytosol);GO:0090305(nucleic acid phosphodiester bond hydrolysis);GO:0005515(protein binding);GO:0006281(DNA repair);GO:0006974(cellular response to DNA damage stimulus);GO:0003906(DNA-(apurinic or apyrimidinic site) lyase activity);GO…	NA	NA	NA	aprataxin and PNKP like factor [Source:HGNC Symbol;Acc:HGNC:28724]	0	0	0.288084	0.006836	-inf	-inf	1	1
chr10	+	28533540	28608433	ENST00000428935	protein_coding	9	1320	ENSG00000095787	WAC	GO:0005634(nucleus);GO:0016607(nuclear speck);GO:0005654(nucleoplasm);GO:0006351(transcription, DNA-templated);GO:0006355(regulation of transcription, DNA-templated);GO:0016569(covalent chromatin modification);GO:0005515(protein binding);GO:0006974(cellular response to DNA damage stimulus);GO:0045893(positive regulation of transcription, DNA-templated);GO:0016567(protein ubiquitination);GO:000368…	NA	NA	NA	WW domain containing adaptor with coiled-coil [Source:HGNC Symbol;Acc:HGNC:17327]	0	0	0	0.468523	-inf	-inf	1	1
chr18	+	3878180	3897069	ENST00000577649	antisense_RNA	3	1258	ENSG00000263724	DLGAP1-AS3	NA	NA	NA	NA	DLGAP1 antisense RNA 3 [Source:HGNC Symbol;Acc:HGNC:27317]	0	0	0.024104	0	-inf	-inf	1	1
chr12	+	7067091	7070240	ENST00000495061	processed_transcript	5	832	ENSG00000182326	C1S	GO:0046872(metal ion binding);GO:0016787(hydrolase activity);GO:0005509(calcium ion binding);GO:0005515(protein binding);GO:0008233(peptidase activity);GO:0006508(proteolysis);GO:0004252(serine-type endopeptidase activity);GO:0008236(serine-type peptidase activity);GO:0002376(immune system process);GO:0045087(innate immune response);GO:0006956(complement activation);GO:0006958(complement activati…	04610(Complement and coagulation cascades);05322(Systemic lupus erythematosus);05133(Pertussis);05150(Staphylococcus aureus infection)	NA	NA	complement C1s [Source:HGNC Symbol;Acc:HGNC:1247]	0	0	0	0.000334	-inf	-inf	1	1
chr17	-	15438141	15563448	ENST00000518506	nonsense_mediated_decay	7	520	ENSG00000259024	TVP23C-CDRT4	GO:0016020(membrane);GO:0016021(integral component of membrane)	NA	NA	NA	TVP23C-CDRT4 readthrough [Source:HGNC Symbol;Acc:HGNC:42961]	0	0	0.014219	0	-inf	-inf	1	1
chr2	-	240676418	240682906	ENST00000414322	nonsense_mediated_decay	5	3013	ENSG00000185176	AQP12B	GO:0006810(transport);GO:0016020(membrane);GO:0016021(integral component of membrane);GO:0005215(transporter activity)	NA	NA	NA	aquaporin 12B [Source:HGNC Symbol;Acc:HGNC:6096]	0	0	0	0.007458	-inf	-inf	1	1
chr15	-	40736427	40745211	ENST00000558232	protein_coding	9	1033	ENSG00000137824	RMDN3	GO:0005634(nucleus);GO:0005737(cytoplasm);GO:0016020(membrane);GO:0016021(integral component of membrane);GO:0005739(mitochondrion);GO:0005856(cytoskeleton);GO:0005515(protein binding);GO:0006915(apoptotic process);GO:0005741(mitochondrial outer membrane);GO:0030154(cell differentiation);GO:0005874(microtubule);GO:0000922(spindle pole);GO:0005819(spindle);GO:0031966(mitochondrial membrane);GO:000…	NA	NA	NA	regulator of microtubule dynamics 3 [Source:HGNC Symbol;Acc:HGNC:25550]	0	0	0	3.21241	-inf	-inf	1	1
chr12	-	13083560	13095675	ENST00000337630	protein_coding	6	2390	ENSG00000111305	GSG1	GO:0016020(membrane);GO:0016021(integral component of membrane);GO:0005783(endoplasmic reticulum);GO:0005789(endoplasmic reticulum membrane);GO:0005515(protein binding);GO:0070063(RNA polymerase binding)	NA	NA	NA	germ cell associated 1 [Source:HGNC Symbol;Acc:HGNC:19716]	0	0	0	0.091213	-inf	-inf	1	1
chr8	+	66471441	66474939	ENST00000498712	processed_transcript	3	478	ENSG00000169085	C8orf46	NA	NA	NA	NA	chromosome 8 open reading frame 46 [Source:HGNC Symbol;Acc:HGNC:28498]	0	0	0.035732	0.046361	-inf	-inf	1	1
chr21	+	34375604	34389153	ENST00000399295	protein_coding	4	1074	ENSG00000205670	SMIM11A	GO:0016020(membrane);GO:0016021(integral component of membrane);GO:0003674(molecular_function);GO:0008150(biological_process);GO:0005575(cellular_component)	NA	NA	NA	small integral membrane protein 11A [Source:HGNC Symbol;Acc:HGNC:1293]	0	0	0	1.56227	-inf	-inf	1	1
chr12	+	56521958	56589503	ENST00000552247	protein_coding	12	1471	ENSG00000076067	RBMS2	GO:0003676(nucleic acid binding);GO:0003723(RNA binding);GO:0005634(nucleus);GO:0006396(RNA processing)	NA	NA	NA	RNA binding motif single stranded interacting protein 2 [Source:HGNC Symbol;Acc:HGNC:9909]	0	0	0	0.090478	-inf	-inf	1	1
chr11	+	119372706	119381613	ENST00000530918	antisense_RNA	2	778	ENSG00000254740	AP003396.3	NA	NA	NA	NA	NA	0	0	0	0.005563	-inf	-inf	1	1
chr2	+	148196208	148233316	ENST00000637830	processed_transcript	2	100	ENSG00000204406	MBD5	GO:0005634(nucleus);GO:0005694(chromosome);GO:0030496(midbody);GO:0007399(nervous system development);GO:0005654(nucleoplasm);GO:0070062(extracellular exosome);GO:0016579(protein deubiquitination);GO:0003682(chromatin binding);GO:0042593(glucose homeostasis);GO:0040014(regulation of multicellular organism growth);GO:0010369(chromocenter);GO:0044708(single-organism behavior);GO:0060399(positive re…	NA	NA	NA	methyl-CpG binding domain protein 5 [Source:HGNC Symbol;Acc:HGNC:20444]	0	0	0.046702	0	-inf	-inf	1	1
chr8	-	80594815	80595703	ENST00000521814	processed_pseudogene	1	889	ENSG00000254181	SLC25A51P3	NA	NA	NA	NA	solute carrier family 25 member 51 pseudogene 3 [Source:HGNC Symbol;Acc:HGNC:31051]	0	0	0	0.02663	-inf	-inf	1	1
chr10	-	30299569	30299673	ENST00000364017	snRNA	1	105	ENSG00000200887	RNU6-598P	NA	NA	NA	NA	RNA, U6 small nuclear 598, pseudogene [Source:HGNC Symbol;Acc:HGNC:47561]	0	0	0	0.127518	-inf	-inf	1	1
chr4	-	174636914	174829314	ENST00000274093	protein_coding	10	8770	ENSG00000145451	GLRA3	GO:0006810(transport);GO:0016020(membrane);GO:0016021(integral component of membrane);GO:0046872(metal ion binding);GO:0005216(ion channel activity);GO:0006811(ion transport);GO:0005887(integral component of plasma membrane);GO:0005886(plasma membrane);GO:0042995(cell projection);GO:0030054(cell junction);GO:0045202(synapse);GO:0045211(postsynaptic membrane);GO:0005254(chloride channel activity);…	04080(Neuroactive ligand-receptor interaction)	K05195	NA	glycine receptor alpha 3 [Source:HGNC Symbol;Acc:HGNC:4328]	0	0	0	0.006682	-inf	-inf	1	1
chr15	+	69284162	69295322	ENST00000558454	lincRNA	2	421	ENSG00000259504	AC026992.1	NA	NA	NA	NA	NA	0	0	0	0.179999	-inf	-inf	1	1
chr16	+	69933081	69933180	ENST00000385282	miRNA	1	100	ENSG00000208017	MIR140	GO:0005615(extracellular space);GO:1903231(mRNA binding involved in posttranscriptional gene silencing);GO:0035195(gene silencing by miRNA);GO:0000993(RNA polymerase II core binding);GO:1904706(negative regulation of vascular smooth muscle cell proliferation);GO:1904753(negative regulation of vascular associated smooth muscle cell migration);GO:0030513(positive regulation of BMP signaling pathway)	NA	NA	NA	microRNA 140 [Source:HGNC Symbol;Acc:HGNC:31527]	0	0	0	0.029107	-inf	-inf	1	1
chr9	-	67175775	67176035	ENST00000612850	misc_RNA	1	261	ENSG00000274852	RN7SL422P	NA	NA	NA	NA	RNA, 7SL, cytoplasmic 422, pseudogene [Source:HGNC Symbol;Acc:HGNC:46438]	0	0	0.129834	0	-inf	-inf	1	1
chr6	+	30006583	30009956	ENST00000469281	processed_transcript	6	1241	ENSG00000204622	HLA-J	NA	NA	NA	NA	major histocompatibility complex, class I, J (pseudogene) [Source:HGNC Symbol;Acc:HGNC:4967]	0	0	0	0.36063	-inf	-inf	1	1
chr9	+	21994791	22120544	ENST00000585267	antisense_RNA	9	1337	ENSG00000240498	CDKN2B-AS1	NA	NA	NA	NA	CDKN2B antisense RNA 1 [Source:HGNC Symbol;Acc:HGNC:34341]	0	0	0	0.04117	-inf	-inf	1	1
chr14	+	56609141	56633171	ENST00000555905	nonsense_mediated_decay	6	766	ENSG00000070269	TMEM260	GO:0016020(membrane);GO:0016021(integral component of membrane)	NA	NA	NA	transmembrane protein 260 [Source:HGNC Symbol;Acc:HGNC:20185]	0	0	0.629301	0.141643	-inf	-inf	1	1
chr13	+	38687129	38887131	ENST00000280481	protein_coding	24	16070	ENSG00000150893	FREM2	GO:0016020(membrane);GO:0016021(integral component of membrane);GO:0046872(metal ion binding);GO:0007155(cell adhesion);GO:0005886(plasma membrane);GO:0007275(multicellular organism development);GO:0007154(cell communication);GO:0070062(extracellular exosome);GO:0002009(morphogenesis of an epithelium);GO:0007507(heart development);GO:0048839(inner ear development);GO:0005604(basement membrane)	NA	NA	NA	FRAS1 related extracellular matrix protein 2 [Source:HGNC Symbol;Acc:HGNC:25396]	0	0	0.001018	0	-inf	-inf	1	1
chr4	-	55478847	55546881	ENST00000506923	processed_transcript	6	616	ENSG00000134852	CLOCK	GO:0005634(nucleus);GO:0005737(cytoplasm);GO:0043231(intracellular membrane-bounded organelle);GO:0005654(nucleoplasm);GO:0016740(transferase activity);GO:0046983(protein dimerization activity);GO:0006355(regulation of transcription, DNA-templated);GO:0006366(transcription from RNA polymerase II promoter);GO:0006351(transcription, DNA-templated);GO:0003677(DNA binding);GO:0003700(transcription fa…	04728(Dopaminergic synapse);04710(Circadian rhythm);05168(Herpes simplex infection)	NA	NA	clock circadian regulator [Source:HGNC Symbol;Acc:HGNC:2082]	0	0	0.763673	1.28714	-inf	-inf	1	1
chr9	-	60955252	60956486	ENST00000611126	lincRNA	2	418	ENSG00000276422	AL590491.2	NA	NA	NA	NA	NA	0	0	0	0.010058	-inf	-inf	1	1
chr11	-	617256	624932	ENST00000531177	nonsense_mediated_decay	15	2816	ENSG00000099834	CDHR5	GO:0016020(membrane);GO:0016021(integral component of membrane);GO:0005509(calcium ion binding);GO:0007155(cell adhesion);GO:0007156(homophilic cell adhesion via plasma membrane adhesion molecules);GO:0005886(plasma membrane);GO:0042995(cell projection);GO:0005515(protein binding);GO:0030154(cell differentiation);GO:0070062(extracellular exosome);GO:0016324(apical plasma membrane);GO:0031526(brus…	NA	NA	NA	cadherin related family member 5 [Source:HGNC Symbol;Acc:HGNC:7521]	0	0	0.085102	0	-inf	-inf	1	1
chr3	+	138348850	138403186	ENST00000464896	protein_coding	5	1534	ENSG00000158186	MRAS	GO:0005622(intracellular);GO:0016020(membrane);GO:0005525(GTP binding);GO:0000166(nucleotide binding);GO:0007165(signal transduction);GO:0003924(GTPase activity);GO:0005886(plasma membrane);GO:0005515(protein binding);GO:0070062(extracellular exosome);GO:0007275(multicellular organism development);GO:0007517(muscle organ development);GO:0030742(GTP-dependent protein binding);GO:0007265(Ras protei…	04014(Ras signaling pathway);04015(Rap1 signaling pathway);04010(MAPK signaling pathway);04371(Apelin signaling pathway);04072(Phospholipase D signaling pathway);04140(Autophagy - animal);04137(Mitophagy - animal);04218(Cellular senescence);04810(Regulation of actin cytoskeleton);05205(Proteoglycans in cancer);05166(HTLV-I infection)	K07831	NA	muscle RAS oncogene homolog [Source:HGNC Symbol;Acc:HGNC:7227]	0	0	0	0.034661	-inf	-inf	1	1
chr18	-	76978852	77017055	ENST00000397875	protein_coding	6	2168	ENSG00000197971	MBP	GO:0005634(nucleus);GO:0016020(membrane);GO:0005886(plasma membrane);GO:0005515(protein binding);GO:0019911(structural constituent of myelin sheath);GO:0021762(substantia nigra development);GO:0006955(immune response);GO:0007417(central nervous system development);GO:0043234(protein complex);GO:0007268(chemical synaptic transmission);GO:0043025(neuronal cell body);GO:0043209(myelin sheath);GO:000…	NA	NA	NA	myelin basic protein [Source:HGNC Symbol;Acc:HGNC:6925]	0	0	0	0.00215	-inf	-inf	1	1
chr9	-	83806355	83817296	ENST00000485742	protein_coding	3	403	ENSG00000165113	GKAP1	GO:0007165(signal transduction);GO:0005794(Golgi apparatus);GO:0016301(kinase activity);GO:0016310(phosphorylation);GO:0005515(protein binding);GO:0042802(identical protein binding)	NA	NA	NA	G kinase anchoring protein 1 [Source:HGNC Symbol;Acc:HGNC:17496]	0	0	0.063106	0	-inf	-inf	1	1
chr4	+	82275071	82276600	ENST00000504996	processed_pseudogene	1	1530	ENSG00000234568	BIN2P1	NA	NA	NA	NA	bridging integrator 2 pseudogene 1 [Source:HGNC Symbol;Acc:HGNC:43660]	0	0	0.011287	0	-inf	-inf	1	1
chr1	+	155586644	155602197	ENST00000441522	unprocessed_pseudogene	3	278	ENSG00000225082	DAP3P1	NA	NA	NA	NA	death associated protein 3 pseudogene 1 [Source:HGNC Symbol;Acc:HGNC:17624]	0	0	0	0.108371	-inf	-inf	1	1
chr9	-	35661838	35662644	ENST00000488918	processed_transcript	3	347	ENSG00000137135	ARHGEF39	GO:0016020(membrane);GO:0005886(plasma membrane);GO:0005089(Rho guanyl-nucleotide exchange factor activity);GO:0035023(regulation of Rho protein signal transduction);GO:0043547(positive regulation of GTPase activity);GO:0005515(protein binding);GO:0005085(guanyl-nucleotide exchange factor activity);GO:0030335(positive regulation of cell migration)	NA	NA	NA	Rho guanine nucleotide exchange factor 39 [Source:HGNC Symbol;Acc:HGNC:25909]	0	0	0.39459	0	-inf	-inf	1	1
chr2	+	191370938	191371044	ENST00000516321	snRNA	1	107	ENSG00000252130	RNU6-1045P	NA	NA	NA	NA	RNA, U6 small nuclear 1045, pseudogene [Source:HGNC Symbol;Acc:HGNC:48008]	0	0	0.115419	0.344573	-inf	-inf	1	1
chr11	+	17736367	17856797	ENST00000640318	protein_coding	5	2736	ENSG00000129159	KCNC1	GO:0006810(transport);GO:0016020(membrane);GO:0016021(integral component of membrane);GO:0055085(transmembrane transport);GO:0005216(ion channel activity);GO:0006811(ion transport);GO:0005244(voltage-gated ion channel activity);GO:0005249(voltage-gated potassium channel activity);GO:0005267(potassium channel activity);GO:0006813(potassium ion transport);GO:0034765(regulation of ion transmembrane …	NA	NA	NA	potassium voltage-gated channel subfamily C member 1 [Source:HGNC Symbol;Acc:HGNC:6233]	0	0	0	0.124168	-inf	-inf	1	1
chr8	+	76693406	76704554	ENST00000517585	protein_coding	2	613	ENSG00000091656	ZFHX4	GO:0003676(nucleic acid binding);GO:0005634(nucleus);GO:0008270(zinc ion binding);GO:0046872(metal ion binding);GO:0006355(regulation of transcription, DNA-templated);GO:0006351(transcription, DNA-templated);GO:0003677(DNA binding);GO:0043565(sequence-specific DNA binding)	NA	NA	NA	zinc finger homeobox 4 [Source:HGNC Symbol;Acc:HGNC:30939]	0	0	0	0.105841	-inf	-inf	1	1
chr22	+	40348639	40358912	ENST00000638161	processed_transcript	5	668	ENSG00000239900	ADSL	GO:0003824(catalytic activity);GO:0016829(lyase activity);GO:0006164(purine nucleotide biosynthetic process);GO:0044208('de novo' AMP biosynthetic process);GO:0004018(N6-(1,2-dicarboxyethyl)AMP AMP-lyase (fumarate-forming) activity);GO:0070626((S)-2-(5-amino-1-(5-phospho-D-ribosyl)imidazole-4-carboxamido)succinate AMP-lyase (fumarate-forming) activity);GO:0006189('de novo' IMP biosynthetic proces…	00230(Purine metabolism);00250(Alanine, aspartate and glutamate metabolism)	NA	NA	adenylosuccinate lyase [Source:HGNC Symbol;Acc:HGNC:291]	0	0	0.778533	0.055942	-inf	-inf	1	1
chr9	-	40332995	40333460	ENST00000416024	unprocessed_pseudogene	1	466	ENSG00000224681	BX664727.1	NA	NA	NA	NA	NA	0	0	0.021115	0	-inf	-inf	1	1
chr1	-	31660588	31666159	ENST00000482910	retained_intron	10	676	ENSG00000084636	COL16A1	GO:0007155(cell adhesion);GO:0005576(extracellular region);GO:0005581(collagen trimer);GO:0005578(proteinaceous extracellular matrix);GO:0007229(integrin-mediated signaling pathway);GO:0005515(protein binding);GO:0005178(integrin binding);GO:0005788(endoplasmic reticulum lumen);GO:0030198(extracellular matrix organization);GO:0007565(female pregnancy);GO:0033622(integrin activation);GO:0033627(ce…	NA	NA	NA	collagen type XVI alpha 1 chain [Source:HGNC Symbol;Acc:HGNC:2193]	0	0	0.008318	0	-inf	-inf	1	1
chr8	-	101177997	101200093	ENST00000518071	nonsense_mediated_decay	3	540	ENSG00000120963	ZNF706	GO:0005634(nucleus);GO:0005737(cytoplasm);GO:0046872(metal ion binding);GO:0006417(regulation of translation);GO:0045892(negative regulation of transcription, DNA-templated);GO:1902455(negative regulation of stem cell population maintenance)	NA	NA	NA	zinc finger protein 706 [Source:HGNC Symbol;Acc:HGNC:24992]	0	0	1.37703	0.504405	-inf	-inf	1	1
chr1	-	31919130	31944856	ENST00000526960	processed_transcript	2	793	ENSG00000184007	PTP4A2	GO:0005737(cytoplasm);GO:0016020(membrane);GO:0016787(hydrolase activity);GO:0004725(protein tyrosine phosphatase activity);GO:0016791(phosphatase activity);GO:0006470(protein dephosphorylation);GO:0016311(dephosphorylation);GO:0035335(peptidyl-tyrosine dephosphorylation);GO:0005886(plasma membrane);GO:0004721(phosphoprotein phosphatase activity);GO:0005634(nucleus);GO:0005768(endosome);GO:000582…	NA	NA	NA	protein tyrosine phosphatase type IVA, member 2 [Source:HGNC Symbol;Acc:HGNC:9635]	0	0	0	0.071868	-inf	-inf	1	1
chr22	+	42090967	42091596	ENST00000608974	antisense_RNA	2	510	ENSG00000237037	NDUFA6-AS1	NA	NA	NA	NA	NDUFA6 antisense RNA 1 (head to head) [Source:HGNC Symbol;Acc:HGNC:45273]	0	0	0.05159	0	-inf	-inf	1	1
chr8	-	18056466	18084142	ENST00000636171	protein_coding	14	2283	ENSG00000104763	ASAH1	GO:0016787(hydrolase activity);GO:0006629(lipid metabolic process);GO:0005764(lysosome);GO:0005615(extracellular space);GO:0005576(extracellular region);GO:0006687(glycosphingolipid metabolic process);GO:0070062(extracellular exosome);GO:0043312(neutrophil degranulation);GO:1904813(ficolin-1-rich granule lumen);GO:1904724(tertiary granule lumen);GO:0043202(lysosomal lumen);GO:0003824(catalytic ac…	00600(Sphingolipid metabolism);04071(Sphingolipid signaling pathway);04142(Lysosome)	NA	NA	N-acylsphingosine amidohydrolase 1 [Source:HGNC Symbol;Acc:HGNC:735]	0	0	0.007691	0.181623	-inf	-inf	1	1
chr17	+	51042524	51085471	ENST00000509833	antisense_RNA	3	332	ENSG00000249870	AC005920.2	NA	NA	NA	NA	NA	0	0	0	0.221943	-inf	-inf	1	1
chr8	+	58553237	58582056	ENST00000424270	protein_coding	9	1277	ENSG00000137575	SDCBP	GO:0005737(cytoplasm);GO:0005634(nucleus);GO:0016020(membrane);GO:0016021(integral component of membrane);GO:0043231(intracellular membrane-bounded organelle);GO:0005829(cytosol);GO:0005654(nucleoplasm);GO:0035556(intracellular signal transduction);GO:0031965(nuclear membrane);GO:0005783(endoplasmic reticulum);GO:0005789(endoplasmic reticulum membrane);GO:0005886(plasma membrane);GO:0030036(actin…	NA	NA	NA	syndecan binding protein [Source:HGNC Symbol;Acc:HGNC:10662]	0	0	0.179931	0	-inf	-inf	1	1
chr3	+	113019533	113088715	ENST00000470313	antisense_RNA	3	491	ENSG00000240057	AC078785.1	NA	NA	NA	NA	NA	0	0	0.167989	0	-inf	-inf	1	1
chr5	+	44752949	44765744	ENST00000511712	lincRNA	3	591	ENSG00000248779	AC093297.1	NA	NA	NA	NA	NA	0	0	0.085011	0.362921	-inf	-inf	1	1
chr5	-	100046977	100048785	ENST00000603719	processed_pseudogene	1	1809	ENSG00000271687	MTND5P10	NA	NA	NA	NA	mitochondrially encoded NADH:ubiquinone oxidoreductase core subunit 5 pseudogene 10 [Source:HGNC Symbol;Acc:HGNC:42272]	0	0	0	0.031537	-inf	-inf	1	1
chr1	-	3735601	3736588	ENST00000624167	processed_transcript	1	988	ENSG00000227372	TP73-AS1	NA	NA	NA	NA	TP73 antisense RNA 1 [Source:HGNC Symbol;Acc:HGNC:29052]	0	0	0	0.029657	-inf	-inf	1	1
chr5	-	81442651	81616473	ENST00000509743	processed_transcript	11	779	ENSG00000145687	SSBP2	GO:0005634(nucleus);GO:0006366(transcription from RNA polymerase II promoter);GO:0006355(regulation of transcription, DNA-templated);GO:0003677(DNA binding);GO:0003697(single-stranded DNA binding);GO:0005737(cytoplasm);GO:0045944(positive regulation of transcription from RNA polymerase II promoter);GO:0000978(RNA polymerase II core promoter proximal region sequence-specific DNA binding);GO:000107…	NA	NA	NA	single stranded DNA binding protein 2 [Source:HGNC Symbol;Acc:HGNC:15831]	0	0	0.032795	0.191435	-inf	-inf	1	1
chr20	-	35734767	35736641	ENST00000498280	processed_transcript	2	444	ENSG00000131051	RBM39	GO:0005634(nucleus);GO:0003676(nucleic acid binding);GO:0003723(RNA binding);GO:0006397(mRNA processing);GO:0008380(RNA splicing);GO:0016607(nuclear speck);GO:0005654(nucleoplasm);GO:0006351(transcription, DNA-templated);GO:0006355(regulation of transcription, DNA-templated);GO:0015630(microtubule cytoskeleton);GO:0005515(protein binding);GO:0005815(microtubule organizing center);GO:0006396(RNA p…	NA	NA	NA	RNA binding motif protein 39 [Source:HGNC Symbol;Acc:HGNC:15923]	0	0	0.13938	0	-inf	-inf	1	1
chr4	+	87975715	87983326	ENST00000509659	processed_transcript	8	1664	ENSG00000118785	SPP1	GO:0005615(extracellular space);GO:0007566(embryo implantation);GO:0005794(Golgi apparatus);GO:0007155(cell adhesion);GO:0005515(protein binding);GO:0005576(extracellular region);GO:0005125(cytokine activity);GO:0001503(ossification);GO:0070062(extracellular exosome);GO:0031214(biomineral tissue development);GO:0044267(cellular protein metabolic process);GO:0043687(post-translational protein modi…	04371(Apelin signaling pathway);04151(PI3K-Akt signaling pathway);04512(ECM-receptor interaction);04510(Focal adhesion);04620(Toll-like receptor signaling pathway);05165(Human papillomavirus infection)	NA	NA	secreted phosphoprotein 1 [Source:HGNC Symbol;Acc:HGNC:11255]	0	0	0.542892	0	-inf	-inf	1	1
chr3	+	98771055	98788438	ENST00000485145	protein_coding	6	700	ENSG00000064225	ST3GAL6	GO:0016020(membrane);GO:0016021(integral component of membrane);GO:0016740(transferase activity);GO:0008373(sialyltransferase activity);GO:0016757(transferase activity, transferring glycosyl groups);GO:0006486(protein glycosylation);GO:0097503(sialylation);GO:0005794(Golgi apparatus);GO:0000139(Golgi membrane);GO:0070062(extracellular exosome);GO:0006464(cellular protein modification process);GO:…	00601(Glycosphingolipid biosynthesis - lacto and neolacto series)	NA	NA	ST3 beta-galactoside alpha-2,3-sialyltransferase 6 [Source:HGNC Symbol;Acc:HGNC:18080]	0	0	0	0.180544	-inf	-inf	1	1
chr15	+	49170224	49283579	ENST00000559208	nonsense_mediated_decay	8	861	ENSG00000156958	GALK2	GO:0005737(cytoplasm);GO:0000166(nucleotide binding);GO:0005524(ATP binding);GO:0016740(transferase activity);GO:0016301(kinase activity);GO:0016310(phosphorylation);GO:0008152(metabolic process);GO:0016773(phosphotransferase activity, alcohol group as acceptor);GO:0046835(carbohydrate phosphorylation);GO:0006012(galactose metabolic process);GO:0004335(galactokinase activity);GO:0005534(galactose…	NA	NA	NA	galactokinase 2 [Source:HGNC Symbol;Acc:HGNC:4119]	0	0	0.00471	0	-inf	-inf	1	1
chr16	-	85690170	85751129	ENST00000602719	protein_coding	4	1002	ENSG00000154102	C16orf74	GO:0005515(protein binding)	NA	NA	NA	chromosome 16 open reading frame 74 [Source:HGNC Symbol;Acc:HGNC:23362]	0	0	0.056144	0	-inf	-inf	1	1
chr18	+	35144942	35145417	ENST00000619893	lincRNA	1	476	ENSG00000274400	AC015967.1	NA	NA	NA	NA	NA	0	0	0.120655	0.041582	-inf	-inf	1	1
chr3	+	190514096	190519030	ENST00000465496	processed_transcript	2	646	ENSG00000196083	IL1RAP	GO:0016020(membrane);GO:0016021(integral component of membrane);GO:0007165(signal transduction);GO:0005886(plasma membrane);GO:0005576(extracellular region);GO:0002376(immune system process);GO:0045087(innate immune response);GO:0006954(inflammatory response);GO:0005887(integral component of plasma membrane);GO:0004908(interleukin-1 receptor activity);GO:0004871(signal transducer activity);GO:000…	04010(MAPK signaling pathway);04060(Cytokine-cytokine receptor interaction);04659(Th17 cell differentiation);04750(Inflammatory mediator regulation of TRP channels)	NA	NA	interleukin 1 receptor accessory protein [Source:HGNC Symbol;Acc:HGNC:5995]	0	0	0.156993	0.071756	-inf	-inf	1	1
chr5	+	98769294	98770466	ENST00000505265	processed_transcript	2	446	ENSG00000174136	RGMB	GO:0007155(cell adhesion);GO:0030509(BMP signaling pathway);GO:0042802(identical protein binding);GO:0007165(signal transduction);GO:0045893(positive regulation of transcription, DNA-templated);GO:0005793(endoplasmic reticulum-Golgi intermediate compartment);GO:0046658(anchored component of plasma membrane);GO:0016020(membrane);GO:0005886(plasma membrane);GO:0031225(anchored component of membrane…	NA	NA	NA	repulsive guidance molecule family member b [Source:HGNC Symbol;Acc:HGNC:26896]	0	0	0	0.015251	-inf	-inf	1	1
chr11	-	61906473	61920267	ENST00000531922	protein_coding	5	866	ENSG00000167994	RAB3IL1	GO:0006810(transport);GO:0015031(protein transport);GO:0043547(positive regulation of GTPase activity);GO:0005515(protein binding);GO:0005085(guanyl-nucleotide exchange factor activity);GO:0005829(cytosol);GO:0017112(Rab guanyl-nucleotide exchange factor activity);GO:0061024(membrane organization)	NA	NA	NA	RAB3A interacting protein like 1 [Source:HGNC Symbol;Acc:HGNC:9780]	0	0	0.538889	0	-inf	-inf	1	1
chr16	-	3307573	3308393	ENST00000574245	antisense_RNA	1	821	ENSG00000262899	AC004232.2	NA	NA	NA	NA	NA	0	0	0	2.7e-05	-inf	-inf	1	1
chr13	-	40469953	40611129	ENST00000636651	processed_transcript	4	1773	ENSG00000150907	FOXO1	GO:0005634(nucleus);GO:0005737(cytoplasm);GO:0006355(regulation of transcription, DNA-templated);GO:0006351(transcription, DNA-templated);GO:0003677(DNA binding);GO:0003700(transcription factor activity, sequence-specific DNA binding);GO:0005829(cytosol);GO:0005739(mitochondrion);GO:0043565(sequence-specific DNA binding);GO:0005515(protein binding);GO:0006974(cellular response to DNA damage stimu…	04068(FoxO signaling pathway);04152(AMPK signaling pathway);04218(Cellular senescence);04910(Insulin signaling pathway);04922(Glucagon signaling pathway);04919(Thyroid hormone signaling pathway);04211(Longevity regulating pathway - mammal);04213(Longevity regulating pathway - multiple species);05200(Pathways in cancer);05202(Transcriptional misregulation in cancers);05215(Prostate cancer);04931(I…	NA	NA	forkhead box O1 [Source:HGNC Symbol;Acc:HGNC:3819]	0	0	1.82919	0.060317	-inf	-inf	1	1
chr3	+	186931087	187042831	ENST00000430309	protein_coding	4	504	ENSG00000073849	ST6GAL1	GO:0016020(membrane);GO:0016021(integral component of membrane);GO:0016740(transferase activity);GO:0008373(sialyltransferase activity);GO:0016757(transferase activity, transferring glycosyl groups);GO:0006486(protein glycosylation);GO:0005794(Golgi apparatus);GO:0005576(extracellular region);GO:0018279(protein N-linked glycosylation via asparagine);GO:0032580(Golgi cisterna membrane);GO:0070062(…	00510(N-Glycan biosynthesis);00514(Other types of O-glycan biosynthesis)	NA	NA	ST6 beta-galactoside alpha-2,6-sialyltransferase 1 [Source:HGNC Symbol;Acc:HGNC:10860]	0	0	0	0.00847	-inf	-inf	1	1
chr8	+	12638428	12638602	ENST00000528506	processed_pseudogene	1	175	ENSG00000255253	AC068587.5	NA	NA	NA	NA	NA	0	0	0	0.006653	-inf	-inf	1	1
chr7	-	56080283	56092996	ENST00000537360	protein_coding	10	2139	ENSG00000164776	PHKG1	GO:0000166(nucleotide binding);GO:0004672(protein kinase activity);GO:0004674(protein serine/threonine kinase activity);GO:0005524(ATP binding);GO:0006468(protein phosphorylation);GO:0016740(transferase activity);GO:0016301(kinase activity);GO:0016310(phosphorylation);GO:0005975(carbohydrate metabolic process);GO:0005516(calmodulin binding);GO:0004689(phosphorylase kinase activity);GO:0005978(gly…	04020(Calcium signaling pathway);04910(Insulin signaling pathway);04922(Glucagon signaling pathway)	NA	NA	phosphorylase kinase catalytic subunit gamma 1 [Source:HGNC Symbol;Acc:HGNC:8930]	0	0	0.006716	0	-inf	-inf	1	1
chr22	+	32383786	32385631	ENST00000444848	lincRNA	2	444	ENSG00000241954	AL021937.4	NA	NA	NA	NA	NA	0	0	0	0.341655	-inf	-inf	1	1
chr9	+	34989641	34998431	ENST00000453597	protein_coding	5	2589	ENSG00000137094	DNAJB5	GO:0005829(cytosol);GO:0006457(protein folding);GO:0005515(protein binding);GO:0051082(unfolded protein binding);GO:0006986(response to unfolded protein);GO:0051087(chaperone binding);GO:0000122(negative regulation of transcription from RNA polymerase II promoter);GO:0005634(nucleus)	NA	NA	NA	DnaJ heat shock protein family (Hsp40) member B5 [Source:HGNC Symbol;Acc:HGNC:14887]	0	0	0.005688	0.01936	-inf	-inf	1	1
chr1	-	85482281	85496281	ENST00000488557	lincRNA	3	460	ENSG00000282057	AC092807.3	NA	NA	NA	NA	NA	0	0	0	0.057371	-inf	-inf	1	1
chr20	+	57351274	57378099	ENST00000492498	nonsense_mediated_decay	11	1156	ENSG00000101146	RAE1	GO:0006810(transport);GO:0005634(nucleus);GO:0005737(cytoplasm);GO:0001650(fibrillar center);GO:0051301(cell division);GO:0005856(cytoskeleton);GO:0005515(protein binding);GO:0007049(cell cycle);GO:0008017(microtubule binding);GO:0000922(spindle pole);GO:0003723(RNA binding);GO:0075733(intracellular transport of virus);GO:0043657(host cell);GO:0005635(nuclear envelope);GO:0005643(nuclear pore);GO…	03013(RNA transport);05164(Influenza A)	NA	NA	ribonucleic acid export 1 [Source:HGNC Symbol;Acc:HGNC:9828]	0	0	0	3.67202	-inf	-inf	1	1
chr4	-	145624159	145626035	ENST00000513203	processed_pseudogene	1	1877	ENSG00000249245	NCOA4P3	NA	NA	NA	NA	nuclear receptor coactivator 4 pseudogene 3 [Source:HGNC Symbol;Acc:HGNC:52404]	0	0	0.003424	0.003412	-inf	-inf	1	1
chr18	-	57567845	57586689	ENST00000585747	protein_coding	5	564	ENSG00000066926	FECH	GO:0016020(membrane);GO:0046872(metal ion binding);GO:0005743(mitochondrial inner membrane);GO:0016829(lyase activity);GO:0005739(mitochondrion);GO:0005515(protein binding);GO:0006783(heme biosynthetic process);GO:0051536(iron-sulfur cluster binding);GO:0051537(2 iron, 2 sulfur cluster binding);GO:0006779(porphyrin-containing compound biosynthetic process);GO:0005759(mitochondrial matrix);GO:0004…	00860(Porphyrin and chlorophyll metabolism)	NA	NA	ferrochelatase [Source:HGNC Symbol;Acc:HGNC:3647]	0	0	0.801671	0.684039	-inf	-inf	1	1
chr6	-	90088961	90296742	ENST00000470301	processed_transcript	4	618	ENSG00000112182	BACH2	GO:0005634(nucleus);GO:0005737(cytoplasm);GO:0005829(cytosol);GO:0006355(regulation of transcription, DNA-templated);GO:0006351(transcription, DNA-templated);GO:0003677(DNA binding);GO:0003700(transcription factor activity, sequence-specific DNA binding);GO:0016567(protein ubiquitination);GO:0004842(ubiquitin-protein transferase activity);GO:0031463(Cul3-RING ubiquitin ligase complex);GO:0000980(…	NA	NA	NA	BTB domain and CNC homolog 2 [Source:HGNC Symbol;Acc:HGNC:14078]	0	0	0.202906	0.405793	-inf	-inf	1	1
chr1	-	31919000	31937785	ENST00000534796	protein_coding	3	900	ENSG00000184007	PTP4A2	GO:0005737(cytoplasm);GO:0016020(membrane);GO:0016787(hydrolase activity);GO:0004725(protein tyrosine phosphatase activity);GO:0016791(phosphatase activity);GO:0006470(protein dephosphorylation);GO:0016311(dephosphorylation);GO:0035335(peptidyl-tyrosine dephosphorylation);GO:0005886(plasma membrane);GO:0004721(phosphoprotein phosphatase activity);GO:0005634(nucleus);GO:0005768(endosome);GO:000582…	NA	NA	NA	protein tyrosine phosphatase type IVA, member 2 [Source:HGNC Symbol;Acc:HGNC:9635]	0	0	0	0.030763	-inf	-inf	1	1
chr3	+	134531849	134545777	ENST00000508778	protein_coding	4	464	ENSG00000182923	CEP63	GO:0005737(cytoplasm);GO:0051301(cell division);GO:0005856(cytoskeleton);GO:0005515(protein binding);GO:0006974(cellular response to DNA damage stimulus);GO:0007049(cell cycle);GO:0000922(spindle pole);GO:0005813(centrosome);GO:0005815(microtubule organizing center);GO:0005829(cytosol);GO:0005814(centriole);GO:0000086(G2/M transition of mitotic cell cycle);GO:0010389(regulation of G2/M transition…	NA	NA	NA	centrosomal protein 63 [Source:HGNC Symbol;Acc:HGNC:25815]	0	0	0	2.80153	-inf	-inf	1	1
chr18	+	34593318	34766027	ENST00000591816	protein_coding	5	534	ENSG00000134769	DTNA	GO:0005737(cytoplasm);GO:0016020(membrane);GO:0008270(zinc ion binding);GO:0046872(metal ion binding);GO:0005886(plasma membrane);GO:0030054(cell junction);GO:0045202(synapse);GO:0005515(protein binding);GO:0043234(protein complex);GO:0007165(signal transduction);GO:0007268(chemical synaptic transmission);GO:0006941(striated muscle contraction);GO:0007274(neuromuscular synaptic transmission);GO:0…	NA	NA	NA	dystrobrevin alpha [Source:HGNC Symbol;Acc:HGNC:3057]	0	0	0	0.000194	-inf	-inf	1	1
chr15	-	101654394	101724410	ENST00000539112	nonsense_mediated_decay	20	2774	ENSG00000185418	TARSL2	GO:0005737(cytoplasm);GO:0006412(translation);GO:0000166(nucleotide binding);GO:0005524(ATP binding);GO:0016874(ligase activity);GO:0005515(protein binding);GO:0004812(aminoacyl-tRNA ligase activity);GO:0006418(tRNA aminoacylation for protein translation);GO:0016876(ligase activity, forming aminoacyl-tRNA and related compounds);GO:0043039(tRNA aminoacylation);GO:0003674(molecular_function);GO:000…	00970(Aminoacyl-tRNA biosynthesis)	NA	NA	threonyl-tRNA synthetase like 2 [Source:HGNC Symbol;Acc:HGNC:24728]	0	0	0	0.005596	-inf	-inf	1	1
chr2	+	62673878	62858416	ENST00000449820	protein_coding	4	539	ENSG00000115504	EHBP1	GO:0006810(transport);GO:0005737(cytoplasm);GO:0016020(membrane);GO:0015031(protein transport);GO:0005829(cytosol);GO:0005886(plasma membrane);GO:0005768(endosome);GO:0006897(endocytosis)	NA	NA	NA	EH domain binding protein 1 [Source:HGNC Symbol;Acc:HGNC:29144]	0	0	0.014251	0.016984	-inf	-inf	1	1
chr16	-	79594331	79600714	ENST00000393350	protein_coding	1	6384	ENSG00000178573	MAF	GO:0005634(nucleus);GO:0006355(regulation of transcription, DNA-templated);GO:0006351(transcription, DNA-templated);GO:0003677(DNA binding);GO:0003700(transcription factor activity, sequence-specific DNA binding);GO:0005515(protein binding);GO:0006366(transcription from RNA polymerase II promoter);GO:0001228(transcriptional activator activity, RNA polymerase II transcription regulatory region seq…	04658(Th1 and Th2 cell differentiation);05202(Transcriptional misregulation in cancers);05321(Inflammatiory bowel disease (IBD))	K09035	NA	MAF bZIP transcription factor [Source:HGNC Symbol;Acc:HGNC:6776]	0	0	0.003554	0	-inf	-inf	1	1
chr2	-	55027207	55112621	ENST00000427710	protein_coding	4	589	ENSG00000115310	RTN4	GO:0003723(RNA binding);GO:0016020(membrane);GO:0016021(integral component of membrane);GO:0005783(endoplasmic reticulum);GO:0005789(endoplasmic reticulum membrane);GO:0005515(protein binding);GO:0006915(apoptotic process);GO:0007399(nervous system development);GO:0005886(plasma membrane);GO:0045296(cadherin binding);GO:0070062(extracellular exosome);GO:0005622(intracellular);GO:0030176(integral …	05010(Alzheimer's disease)	NA	NA	reticulon 4 [Source:HGNC Symbol;Acc:HGNC:14085]	0	0	0	0.017867	-inf	-inf	1	1
chr9	-	4118745	4299916	ENST00000477901	protein_coding	4	1327	ENSG00000107249	GLIS3	GO:0005634(nucleus);GO:0003676(nucleic acid binding);GO:0046872(metal ion binding);GO:0006351(transcription, DNA-templated);GO:0006355(regulation of transcription, DNA-templated);GO:0006357(regulation of transcription from RNA polymerase II promoter);GO:0003677(DNA binding);GO:0000122(negative regulation of transcription from RNA polymerase II promoter);GO:0045944(positive regulation of transcrip…	NA	NA	NA	GLIS family zinc finger 3 [Source:HGNC Symbol;Acc:HGNC:28510]	0	0	0	0.03099	-inf	-inf	1	1
chr9	+	131228294	131233704	ENST00000528406	protein_coding	5	393	ENSG00000126883	NUP214	GO:0006810(transport);GO:0051028(mRNA transport);GO:0005634(nucleus);GO:0015031(protein transport);GO:0043231(intracellular membrane-bounded organelle);GO:0005925(focal adhesion);GO:0005643(nuclear pore);GO:0005515(protein binding);GO:0005654(nucleoplasm);GO:0005829(cytosol);GO:0075733(intracellular transport of virus);GO:0043657(host cell);GO:0043488(regulation of mRNA stability);GO:0008139(nucl…	03013(RNA transport);05169(Epstein-Barr virus infection)	NA	NA	nucleoporin 214 [Source:HGNC Symbol;Acc:HGNC:8064]	0	0	0	0.181657	-inf	-inf	1	1
chr12	-	11391540	11395565	ENST00000389362	protein_coding	4	1429	ENSG00000121335	PRB2	GO:0005576(extracellular region);GO:0003674(molecular_function);GO:0008150(biological_process);GO:0005575(cellular_component)	04970(Salivary secretion)	K13911	NA	proline rich protein BstNI subfamily 2 [Source:HGNC Symbol;Acc:HGNC:9338]	0	0	0	0.024036	-inf	-inf	1	1
chr17	+	19567139	19568084	ENST00000575362	processed_transcript	2	455	ENSG00000142494	SLC47A1	GO:0016020(membrane);GO:0016021(integral component of membrane);GO:0055085(transmembrane transport);GO:0015238(drug transmembrane transporter activity);GO:0015297(antiporter activity);GO:0006855(drug transmembrane transport);GO:0006810(transport);GO:0005886(plasma membrane);GO:1902600(hydrogen ion transmembrane transport);GO:0031982(vesicle);GO:0015695(organic cation transport);GO:0015307(drug:pr…	NA	NA	NA	solute carrier family 47 member 1 [Source:HGNC Symbol;Acc:HGNC:25588]	0	0	0	0.199073	-inf	-inf	1	1
chr7	-	129770383	129770492	ENST00000385255	miRNA	1	110	ENSG00000207990	MIR182	GO:0005615(extracellular space)	NA	NA	NA	microRNA 182 [Source:HGNC Symbol;Acc:HGNC:31553]	0	0	0	0.029989	-inf	-inf	1	1
chr1	+	146057694	146061706	ENST00000457465	lincRNA	3	656	ENSG00000233396	LINC01719	NA	NA	NA	NA	long intergenic non-protein coding RNA 1719 [Source:HGNC Symbol;Acc:HGNC:52506]	0	0	0.059173	0.518483	-inf	-inf	1	1
chr15	+	63042747	63066176	ENST00000560445	protein_coding	3	485	ENSG00000140416	TPM1	GO:1904706(negative regulation of vascular smooth muscle cell proliferation);GO:1904753(negative regulation of vascular associated smooth muscle cell migration);GO:0030336(negative regulation of cell migration);GO:0008360(regulation of cell shape);GO:0005737(cytoplasm);GO:0005829(cytosol);GO:0003779(actin binding);GO:0042803(protein homodimerization activity);GO:0015629(actin cytoskeleton);GO:000…	04260(Cardiac muscle contraction);04261(Adrenergic signaling in cardiomyocytes);05206(MicroRNAs in cancer);05410(Hypertrophic cardiomyopathy (HCM));05414(Dilated cardiomyopathy (DCM))	NA	NA	tropomyosin 1 [Source:HGNC Symbol;Acc:HGNC:12010]	0	0	0.015381	0	-inf	-inf	1	1
chr11	-	8693351	8811341	ENST00000526757	protein_coding	19	3019	ENSG00000166444	ST5	GO:0043547(positive regulation of GTPase activity);GO:0005085(guanyl-nucleotide exchange factor activity);GO:0017112(Rab guanyl-nucleotide exchange factor activity)	NA	NA	NA	suppression of tumorigenicity 5 [Source:HGNC Symbol;Acc:HGNC:11350]	0	0	0.167653	0.000352	-inf	-inf	1	1
chr16	+	20711473	20732990	ENST00000637768	unprocessed_pseudogene	11	1329	ENSG00000283399	AC004381.2	NA	NA	NA	NA	NA	0	0	0.01984	0.010985	-inf	-inf	1	1
chr19	+	38390055	38394763	ENST00000587947	protein_coding	5	646	ENSG00000188766	SPRED3	GO:0016020(membrane);GO:0007275(multicellular organism development);GO:0009966(regulation of signal transduction)	NA	NA	NA	sprouty related EVH1 domain containing 3 [Source:HGNC Symbol;Acc:HGNC:31041]	0	0	0	0.353932	-inf	-inf	1	1
chr19	+	57630395	57642226	ENST00000407202	protein_coding	3	1750	ENSG00000121417	ZNF211	GO:0003676(nucleic acid binding);GO:0046872(metal ion binding);GO:0006355(regulation of transcription, DNA-templated);GO:0005622(intracellular);GO:0005634(nucleus);GO:0006351(transcription, DNA-templated);GO:0003677(DNA binding)	NA	NA	NA	zinc finger protein 211 [Source:HGNC Symbol;Acc:HGNC:13003]	0	0	0	0.918788	-inf	-inf	1	1
chr4	-	25847461	25863760	ENST00000514872	protein_coding	2	558	ENSG00000091490	SEL1L3	GO:0016020(membrane);GO:0016021(integral component of membrane)	NA	NA	NA	SEL1L family member 3 [Source:HGNC Symbol;Acc:HGNC:29108]	0	0	0.607171	0	-inf	-inf	1	1
chr20	-	63406079	63463862	ENST00000637193	protein_coding	15	2983	ENSG00000075043	KCNQ2	GO:0006810(transport);GO:0016020(membrane);GO:0016021(integral component of membrane);GO:0055085(transmembrane transport);GO:0005216(ion channel activity);GO:0006811(ion transport);GO:0005244(voltage-gated ion channel activity);GO:0005249(voltage-gated potassium channel activity);GO:0005267(potassium channel activity);GO:0006813(potassium ion transport);GO:0034765(regulation of ion transmembrane …	04725(Cholinergic synapse)	NA	NA	potassium voltage-gated channel subfamily Q member 2 [Source:HGNC Symbol;Acc:HGNC:6296]	0	0	0.017602	0	-inf	-inf	1	1
chr17	-	39107407	39112177	ENST00000577838	processed_transcript	5	544	ENSG00000161381	PLXDC1	GO:0005737(cytoplasm);GO:0016020(membrane);GO:0016021(integral component of membrane);GO:0005886(plasma membrane);GO:0005576(extracellular region);GO:0030054(cell junction);GO:0001525(angiogenesis);GO:0005923(bicellular tight junction);GO:0005515(protein binding);GO:0043235(receptor complex);GO:0021510(spinal cord development);GO:0030425(dendrite);GO:0043025(neuronal cell body)	NA	NA	NA	plexin domain containing 1 [Source:HGNC Symbol;Acc:HGNC:20945]	0	0	0	0.042751	-inf	-inf	1	1
chr1	+	25820193	25826707	ENST00000525713	protein_coding	5	575	ENSG00000117640	MTFR1L	GO:0005515(protein binding);GO:0009060(aerobic respiration);GO:0005739(mitochondrion);GO:0000266(mitochondrial fission)	NA	NA	NA	mitochondrial fission regulator 1 like [Source:HGNC Symbol;Acc:HGNC:28836]	0	0	0	3.09434	-inf	-inf	1	1
chr9	-	41165024	41183574	ENST00000620776	nonsense_mediated_decay	7	452	ENSG00000215126	CBWD6	GO:0000166(nucleotide binding);GO:0005524(ATP binding)	NA	NA	NA	COBW domain containing 6 [Source:HGNC Symbol;Acc:HGNC:31978]	0	0	0	0.247144	-inf	-inf	1	1
chr4	-	108810721	109050182	ENST00000622134	protein_coding	36	4819	ENSG00000188517	COL25A1	GO:0016020(membrane);GO:0016021(integral component of membrane);GO:0005887(integral component of plasma membrane);GO:0001540(amyloid-beta binding);GO:0005581(collagen trimer);GO:0005615(extracellular space);GO:0005576(extracellular region);GO:0005886(plasma membrane);GO:0008201(heparin binding);GO:0030574(collagen catabolic process);GO:0005788(endoplasmic reticulum lumen);GO:0060385(axonogenesis …	NA	NA	NA	collagen type XXV alpha 1 chain [Source:HGNC Symbol;Acc:HGNC:18603]	0	0	0.02221	0	-inf	-inf	1	1
chr2	+	181954492	182117516	ENST00000486067	processed_transcript	7	722	ENSG00000150722	PPP1R1C	GO:0005737(cytoplasm);GO:0007165(signal transduction);GO:0051301(cell division);GO:0004864(protein phosphatase inhibitor activity);GO:0007049(cell cycle);GO:0035556(intracellular signal transduction);GO:0006469(negative regulation of protein kinase activity);GO:0030307(positive regulation of cell growth);GO:1900087(positive regulation of G1/S transition of mitotic cell cycle);GO:0004865(protein s…	NA	NA	NA	protein phosphatase 1 regulatory inhibitor subunit 1C [Source:HGNC Symbol;Acc:HGNC:14940]	0	0	0.3644	0.001912	-inf	-inf	1	1
chr9	-	77423079	77648307	ENST00000341700	protein_coding	7	2482	ENSG00000156049	GNA14	GO:0005525(GTP binding);GO:0046872(metal ion binding);GO:0000166(nucleotide binding);GO:0007186(G-protein coupled receptor signaling pathway);GO:0007165(signal transduction);GO:0003924(GTPase activity);GO:0004871(signal transducer activity);GO:0005515(protein binding);GO:0001664(G-protein coupled receptor binding);GO:0019001(guanyl nucleotide binding);GO:0031683(G-protein beta/gamma-subunit compl…	04020(Calcium signaling pathway);05146(Amoebiasis);05142(Chagas disease (American trypanosomiasis))	K04636	NA	G protein subunit alpha 14 [Source:HGNC Symbol;Acc:HGNC:4382]	0	0	0.04412	0	-inf	-inf	1	1
chr19	+	46494508	46496502	ENST00000377652	antisense_RNA	1	1995	ENSG00000204850	AC011484.1	NA	NA	NA	NA	NA	0	0	0	0.010894	-inf	-inf	1	1
chr12	-	87820654	87820918	ENST00000549647	processed_pseudogene	1	265	ENSG00000258179	AC079598.4	NA	NA	NA	NA	NA	0	0	0.022733	0.019405	-inf	-inf	1	1
chr22	-	36560870	36562915	ENST00000562756	sense_overlapping	1	2046	ENSG00000261675	AL022313.4	NA	NA	NA	NA	NA	0	0	0	0.024659	-inf	-inf	1	1
chr2	-	55056483	55112567	ENST00000461004	processed_transcript	4	422	ENSG00000115310	RTN4	GO:0003723(RNA binding);GO:0016020(membrane);GO:0016021(integral component of membrane);GO:0005783(endoplasmic reticulum);GO:0005789(endoplasmic reticulum membrane);GO:0005515(protein binding);GO:0006915(apoptotic process);GO:0007399(nervous system development);GO:0005886(plasma membrane);GO:0045296(cadherin binding);GO:0070062(extracellular exosome);GO:0005622(intracellular);GO:0030176(integral …	05010(Alzheimer's disease)	NA	NA	reticulon 4 [Source:HGNC Symbol;Acc:HGNC:14085]	0	0	0	0.021689	-inf	-inf	1	1
chr3	-	9389360	9396605	ENST00000521267	antisense_RNA	4	851	ENSG00000206573	THUMPD3-AS1	NA	NA	NA	NA	THUMPD3 antisense RNA 1 [Source:HGNC Symbol;Acc:HGNC:44478]	0	0	0	0.093489	-inf	-inf	1	1
chr4	-	127933018	127965217	ENST00000641776	nonsense_mediated_decay	7	673	ENSG00000164073	MFSD8	GO:0016020(membrane);GO:0005764(lysosome);GO:0010506(regulation of autophagy);GO:0007040(lysosome organization);GO:0048666(neuron development);GO:0006810(transport);GO:0016021(integral component of membrane);GO:0043231(intracellular membrane-bounded organelle);GO:0055085(transmembrane transport);GO:0005654(nucleoplasm);GO:0005765(lysosomal membrane)	04142(Lysosome)	NA	NA	major facilitator superfamily domain containing 8 [Source:HGNC Symbol;Acc:HGNC:28486]	0	0	0.291057	0	-inf	-inf	1	1
chr3	+	156977558	156977825	ENST00000465138	processed_pseudogene	1	268	ENSG00000241879	KLF3P2	NA	NA	NA	NA	Kruppel like factor 3 pseudogene 2 [Source:HGNC Symbol;Acc:HGNC:41519]	0	0	0	0.165087	-inf	-inf	1	1
chr14	-	76780708	76781456	ENST00000553507	antisense_RNA	2	262	ENSG00000259081	AF111169.4	NA	NA	NA	NA	NA	0	0	0	0.116482	-inf	-inf	1	1
chr11	+	112015307	112016124	ENST00000530733	sense_intronic	2	322	ENSG00000255334	AP000907.3	NA	NA	NA	NA	NA	0	0	0	0.075932	-inf	-inf	1	1
chr15	-	65002578	65029616	ENST00000558460	nonsense_mediated_decay	10	1522	ENSG00000103707	MTFMT	GO:0006412(translation);GO:0016740(transferase activity);GO:0003824(catalytic activity);GO:0009058(biosynthetic process);GO:0005739(mitochondrion);GO:0006413(translational initiation);GO:0016742(hydroxymethyl-, formyl- and related transferase activity);GO:0004479(methionyl-tRNA formyltransferase activity);GO:0071951(conversion of methionyl-tRNA to N-formyl-methionyl-tRNA)	00670(One carbon pool by folate);00970(Aminoacyl-tRNA biosynthesis)	NA	NA	mitochondrial methionyl-tRNA formyltransferase [Source:HGNC Symbol;Acc:HGNC:29666]	0	0	0.519029	0	-inf	-inf	1	1
chr17	+	8088056	8088147	ENST00000583321	miRNA	1	92	ENSG00000264005	MIR4314	NA	NA	NA	NA	microRNA 4314 [Source:HGNC Symbol;Acc:HGNC:38191]	0	0	0.09604	0	-inf	-inf	1	1
chr9	+	106972142	106995682	ENST00000482115	processed_transcript	4	655	ENSG00000148143	ZNF462	GO:0003676(nucleic acid binding);GO:0005634(nucleus);GO:0046872(metal ion binding);GO:0006351(transcription, DNA-templated);GO:0006355(regulation of transcription, DNA-templated);GO:0003677(DNA binding);GO:0005515(protein binding);GO:0006325(chromatin organization);GO:0043392(negative regulation of DNA binding);GO:0045944(positive regulation of transcription from RNA polymerase II promoter)	NA	NA	NA	zinc finger protein 462 [Source:HGNC Symbol;Acc:HGNC:21684]	0	0	0.042921	0	-inf	-inf	1	1
chr6	+	108387512	108388080	ENST00000436728	processed_pseudogene	2	494	ENSG00000227072	AL353706.1	NA	NA	NA	NA	NA	0	0	0.120323	0.127271	-inf	-inf	1	1
chr9	+	69375783	69392454	ENST00000460871	processed_transcript	7	1540	ENSG00000135063	FAM189A2	GO:0016020(membrane);GO:0016021(integral component of membrane);GO:0003674(molecular_function);GO:0008150(biological_process);GO:0005575(cellular_component)	NA	NA	NA	family with sequence similarity 189 member A2 [Source:HGNC Symbol;Acc:HGNC:24820]	0	0	0	0.040276	-inf	-inf	1	1
chr5	+	140639435	140642053	ENST00000513002	protein_coding	4	542	ENSG00000113119	TMCO6	GO:0005634(nucleus);GO:0005737(cytoplasm);GO:0016020(membrane);GO:0016021(integral component of membrane);GO:0008565(protein transporter activity);GO:0005515(protein binding);GO:0006606(protein import into nucleus);GO:0006810(transport)	NA	NA	NA	transmembrane and coiled-coil domains 6 [Source:HGNC Symbol;Acc:HGNC:28814]	0	0	0.00801	0	-inf	-inf	1	1
chr20	-	45375477	45407889	ENST00000494455	processed_transcript	6	582	ENSG00000124251	TP53TG5	GO:0005634(nucleus);GO:0005737(cytoplasm);GO:0003674(molecular_function);GO:0030308(negative regulation of cell growth);GO:0035556(intracellular signal transduction)	NA	NA	NA	TP53 target 5 [Source:HGNC Symbol;Acc:HGNC:15856]	0	0	0.315341	0	-inf	-inf	1	1
chr12	-	31506303	31506404	ENST00000364358	misc_RNA	1	102	ENSG00000201228	Y_RNA	NA	NA	NA	NA	Y RNA [Source:RFAM;Acc:RF00019]	0	0	0	0.144586	-inf	-inf	1	1
chr9	+	129341843	129359538	ENST00000423122	lincRNA	3	545	ENSG00000233901	LINC01503	NA	NA	NA	NA	long intergenic non-protein coding RNA 1503 [Source:HGNC Symbol;Acc:HGNC:51184]	0	0	0	0.464955	-inf	-inf	1	1
chr10	+	122021993	122083007	ENST00000491540	protein_coding	4	547	ENSG00000138162	TACC2	GO:0005634(nucleus);GO:0005737(cytoplasm);GO:0005829(cytosol);GO:0005654(nucleoplasm);GO:0005886(plasma membrane);GO:0005856(cytoskeleton);GO:0005815(microtubule organizing center);GO:0000226(microtubule cytoskeleton organization);GO:0008283(cell proliferation);GO:0021987(cerebral cortex development);GO:0015630(microtubule cytoskeleton);GO:0035257(nuclear hormone receptor binding)	NA	NA	NA	transforming acidic coiled-coil containing protein 2 [Source:HGNC Symbol;Acc:HGNC:11523]	0	0	0.024328	0.010641	-inf	-inf	1	1
chr15	-	76771883	76797608	ENST00000567618	processed_transcript	4	565	ENSG00000140386	SCAPER	GO:0003676(nucleic acid binding);GO:0005634(nucleus);GO:0008270(zinc ion binding);GO:0046872(metal ion binding);GO:0005829(cytosol);GO:0005783(endoplasmic reticulum)	NA	NA	NA	S-phase cyclin A associated protein in the ER [Source:HGNC Symbol;Acc:HGNC:13081]	0	0	0.069806	0	-inf	-inf	1	1
chr3	+	184186174	184194005	ENST00000292808	protein_coding	21	2453	ENSG00000161204	ABCF3	GO:0016020(membrane);GO:0000166(nucleotide binding);GO:0005524(ATP binding);GO:0005515(protein binding);GO:0016887(ATPase activity);GO:0051607(defense response to virus);GO:0045296(cadherin binding)	NA	NA	NA	ATP binding cassette subfamily F member 3 [Source:HGNC Symbol;Acc:HGNC:72]	0	0	0	3.69976	-inf	-inf	1	1
chr19	+	13012207	13081835	ENST00000585382	nonsense_mediated_decay	8	1083	ENSG00000008441	NFIX	GO:0005634(nucleus);GO:0006355(regulation of transcription, DNA-templated);GO:0006351(transcription, DNA-templated);GO:0003677(DNA binding);GO:0003700(transcription factor activity, sequence-specific DNA binding);GO:0005622(intracellular);GO:0005515(protein binding);GO:0006260(DNA replication);GO:0000122(negative regulation of transcription from RNA polymerase II promoter);GO:0045944(positive reg…	NA	NA	NA	nuclear factor I X [Source:HGNC Symbol;Acc:HGNC:7788]	0	0	0	0.08957	-inf	-inf	1	1
chr7	+	148339461	148420998	ENST00000463592	protein_coding	4	6076	ENSG00000174469	CNTNAP2	GO:0071205(protein localization to juxtaparanode region of axon);GO:0016020(membrane);GO:0016021(integral component of membrane);GO:0007155(cell adhesion);GO:0042995(cell projection);GO:0005515(protein binding);GO:0030054(cell junction);GO:0030424(axon);GO:0048812(neuron projection morphogenesis);GO:0009986(cell surface);GO:0019899(enzyme binding);GO:0005769(early endosome);GO:0021987(cerebral co…	04514(Cell adhesion molecules (CAMs))	NA	NA	contactin associated protein like 2 [Source:HGNC Symbol;Acc:HGNC:13830]	0	0	0.016853	0.026481	-inf	-inf	1	1
chr10	-	65912518	67696169	ENST00000433211	protein_coding	18	10675	ENSG00000183230	CTNNA3	GO:0005737(cytoplasm);GO:0051015(actin filament binding);GO:0007155(cell adhesion);GO:0005856(cytoskeleton);GO:0005515(protein binding);GO:0045296(cadherin binding);GO:0005912(adherens junction);GO:0008013(beta-catenin binding);GO:0016337(single organismal cell-cell adhesion);GO:0086091(regulation of heart rate by cardiac conduction);GO:0086083(cell adhesive protein binding involved in bundle of …	04390(Hippo signaling pathway);04520(Adherens junction);04670(Leukocyte transendothelial migration);05200(Pathways in cancer);05226(Gastric cancer);05213(Endometrial cancer);05412(Arrhythmogenic right ventricular cardiomyopathy (ARVC));05100(Bacterial invasion of epithelial cells)	K05691	NA	catenin alpha 3 [Source:HGNC Symbol;Acc:HGNC:2511]	0	0	0	0.002	-inf	-inf	1	1
chr4	-	103091185	103099870	ENST00000509245	protein_coding	6	616	ENSG00000164039	BDH2	GO:0005737(cytoplasm);GO:0005829(cytosol);GO:0016491(oxidoreductase activity);GO:0055114(oxidation-reduction process);GO:0070062(extracellular exosome);GO:0030855(epithelial cell differentiation);GO:0055072(iron ion homeostasis);GO:0046951(ketone body biosynthetic process);GO:0003858(3-hydroxybutyrate dehydrogenase activity);GO:0016628(oxidoreductase activity, acting on the CH-CH group of donors,…	00650(Butanoate metabolism);00072(Synthesis and degradation of ketone bodies)	NA	NA	3-hydroxybutyrate dehydrogenase 2 [Source:HGNC Symbol;Acc:HGNC:32389]	0	0	0.573152	0.37074	-inf	-inf	1	1
chr6	-	149027700	149032573	ENST00000433442	antisense_RNA	2	130	ENSG00000236591	AL357992.1	NA	NA	NA	NA	NA	0	0	0.068752	0	-inf	-inf	1	1
chr5	-	139478368	139482310	ENST00000515507	processed_transcript	5	707	ENSG00000184584	TMEM173	GO:0045944(positive regulation of transcription from RNA polymerase II promoter);GO:0005737(cytoplasm);GO:0016020(membrane);GO:0016021(integral component of membrane);GO:0000166(nucleotide binding);GO:0005829(cytosol);GO:0005654(nucleoplasm);GO:0005783(endoplasmic reticulum);GO:0005789(endoplasmic reticulum membrane);GO:0005739(mitochondrion);GO:0042803(protein homodimerization activity);GO:00058…	04621(NOD-like receptor signaling pathway);04622(RIG-I-like receptor signaling pathway);04623(Cytosolic DNA-sensing pathway)	NA	NA	transmembrane protein 173 [Source:HGNC Symbol;Acc:HGNC:27962]	0	0	0.272537	0	-inf	-inf	1	1
chr7	+	114414997	114693772	ENST00000408937	protein_coding	18	6443	ENSG00000128573	FOXP2	GO:0005634(nucleus);GO:0046872(metal ion binding);GO:0006355(regulation of transcription, DNA-templated);GO:0006351(transcription, DNA-templated);GO:0003677(DNA binding);GO:0003700(transcription factor activity, sequence-specific DNA binding);GO:0042803(protein homodimerization activity);GO:0043565(sequence-specific DNA binding);GO:0005515(protein binding);GO:0000981(RNA polymerase II transcripti…	NA	NA	NA	forkhead box P2 [Source:HGNC Symbol;Acc:HGNC:13875]	0	0	0	0.113454	-inf	-inf	1	1
chr3	-	119635526	119636150	ENST00000495649	processed_pseudogene	1	625	ENSG00000242052	RPL10P7	NA	NA	NA	NA	ribosomal protein L10 pseudogene 7 [Source:HGNC Symbol;Acc:HGNC:35974]	0	0	0	0.043157	-inf	-inf	1	1
chr2	+	218630646	218634554	ENST00000458239	nonsense_mediated_decay	4	548	ENSG00000115556	PLCD4	GO:0005634(nucleus);GO:0005737(cytoplasm);GO:0016020(membrane);GO:0046872(metal ion binding);GO:0005829(cytosol);GO:0016787(hydrolase activity);GO:0035556(intracellular signal transduction);GO:0005509(calcium ion binding);GO:0031965(nuclear membrane);GO:0007165(signal transduction);GO:0005622(intracellular);GO:0006629(lipid metabolic process);GO:0016042(lipid catabolic process);GO:0005886(plasma …	00562(Inositol phosphate metabolism);04020(Calcium signaling pathway);04070(Phosphatidylinositol signaling system);04919(Thyroid hormone signaling pathway);04933(AGE-RAGE signaling pathway in diabetic complications)	NA	NA	phospholipase C delta 4 [Source:HGNC Symbol;Acc:HGNC:9062]	0	0	0.06991	0	-inf	-inf	1	1
chr15	+	52004180	52046109	ENST00000558063	processed_transcript	3	583	ENSG00000069956	MAPK6	GO:0005634(nucleus);GO:0005737(cytoplasm);GO:0000166(nucleotide binding);GO:0004672(protein kinase activity);GO:0004674(protein serine/threonine kinase activity);GO:0005524(ATP binding);GO:0006468(protein phosphorylation);GO:0005829(cytosol);GO:0016740(transferase activity);GO:0004707(MAP kinase activity);GO:0016301(kinase activity);GO:0000165(MAPK cascade);GO:0016310(phosphorylation);GO:0005515(…	04657(IL-17 signaling pathway)	NA	NA	mitogen-activated protein kinase 6 [Source:HGNC Symbol;Acc:HGNC:6879]	0	0	0	0.026295	-inf	-inf	1	1
chr11	-	6999363	7020235	ENST00000536068	protein_coding	4	2562	ENSG00000149050	ZNF214	GO:0003676(nucleic acid binding);GO:0005634(nucleus);GO:0046872(metal ion binding);GO:0006355(regulation of transcription, DNA-templated);GO:0006351(transcription, DNA-templated);GO:0003677(DNA binding);GO:0005622(intracellular);GO:0008270(zinc ion binding)	NA	NA	NA	zinc finger protein 214 [Source:HGNC Symbol;Acc:HGNC:13006]	0	0	0	0.003425	-inf	-inf	1	1
chr11	-	8730875	8757152	ENST00000533580	protein_coding	3	547	ENSG00000166444	ST5	GO:0043547(positive regulation of GTPase activity);GO:0005085(guanyl-nucleotide exchange factor activity);GO:0017112(Rab guanyl-nucleotide exchange factor activity)	NA	NA	NA	suppression of tumorigenicity 5 [Source:HGNC Symbol;Acc:HGNC:11350]	0	0	0	0.003548	-inf	-inf	1	1
chrX	+	136993554	137021618	ENST00000440604	processed_transcript	5	729	ENSG00000234062	AL390879.2	NA	NA	NA	NA	NA	0	0	0.072813	0	-inf	-inf	1	1
chr1	+	17239632	17246004	ENST00000460293	processed_transcript	2	3124	ENSG00000142623	PADI1	GO:0005737(cytoplasm);GO:0005829(cytosol);GO:0005654(nucleoplasm);GO:0016787(hydrolase activity);GO:0005509(calcium ion binding);GO:0004668(protein-arginine deiminase activity);GO:0018101(protein citrullination);GO:0005634(nucleus);GO:0070062(extracellular exosome);GO:0006325(chromatin organization);GO:0036414(histone citrullination)	NA	NA	NA	peptidyl arginine deiminase 1 [Source:HGNC Symbol;Acc:HGNC:18367]	0	0	0.057756	0	-inf	-inf	1	1
chr9	+	131126990	131127091	ENST00000516813	snRNA	1	102	ENSG00000252622	RNU6-881P	NA	NA	NA	NA	RNA, U6 small nuclear 881, pseudogene [Source:HGNC Symbol;Acc:HGNC:47844]	0	0	0	0.136976	-inf	-inf	1	1
chr10	-	48454157	48466696	ENST00000489984	processed_transcript	4	467	ENSG00000128805	ARHGAP22	GO:0005634(nucleus);GO:0005737(cytoplasm);GO:0006351(transcription, DNA-templated);GO:0006355(regulation of transcription, DNA-templated);GO:0007165(signal transduction);GO:0043547(positive regulation of GTPase activity);GO:0005515(protein binding);GO:0007275(multicellular organism development);GO:0030154(cell differentiation);GO:0005096(GTPase activator activity);GO:0005925(focal adhesion);GO:00…	NA	NA	NA	Rho GTPase activating protein 22 [Source:HGNC Symbol;Acc:HGNC:30320]	0	0	0.106681	0.053902	-inf	-inf	1	1
chr6	+	159800294	159805738	ENST00000609334	processed_transcript	7	571	ENSG00000146453	PNLDC1	GO:0003676(nucleic acid binding);GO:0003723(RNA binding);GO:0016020(membrane);GO:0016021(integral component of membrane);GO:0046872(metal ion binding);GO:0016787(hydrolase activity);GO:0005783(endoplasmic reticulum);GO:0005789(endoplasmic reticulum membrane);GO:0090305(nucleic acid phosphodiester bond hydrolysis);GO:0004527(exonuclease activity);GO:0004518(nuclease activity);GO:0000289(nuclear-tr…	03018(RNA degradation)	NA	NA	PARN like, ribonuclease domain containing 1 [Source:HGNC Symbol;Acc:HGNC:21185]	0	0	0	0.060539	-inf	-inf	1	1
chr5	+	134422838	134423335	ENST00000471205	processed_pseudogene	1	498	ENSG00000243648	AC109454.1	NA	NA	NA	NA	NA	0	0	0	0.035848	-inf	-inf	1	1
chr18	+	39314283	39328005	ENST00000637744	lincRNA	4	563	ENSG00000283458	AC011139.1	NA	NA	NA	NA	NA	0	0	0.065609	0	-inf	-inf	1	1
chr3	+	14145373	14148252	ENST00000628412	antisense_RNA	2	890	ENSG00000228242	AC093495.1	NA	NA	NA	NA	NA	0	0	0.087046	0.006281	-inf	-inf	1	1
chr2	-	121339990	121649438	ENST00000455322	protein_coding	39	5660	ENSG00000074054	CLASP1	GO:0005737(cytoplasm);GO:0016020(membrane);GO:0005794(Golgi apparatus);GO:0051301(cell division);GO:0005694(chromosome);GO:0005856(cytoskeleton);GO:0005515(protein binding);GO:0007049(cell cycle);GO:0005874(microtubule);GO:0005925(focal adhesion);GO:0008017(microtubule binding);GO:0005813(centrosome);GO:0005815(microtubule organizing center);GO:0005819(spindle);GO:0000775(chromosome, centromeric …	NA	NA	NA	cytoplasmic linker associated protein 1 [Source:HGNC Symbol;Acc:HGNC:17088]	0	0	0.049741	0.006401	-inf	-inf	1	1
chr3	+	32704818	32773714	ENST00000416457	nonsense_mediated_decay	16	2096	ENSG00000182973	CNOT10	GO:0005634(nucleus);GO:0005737(cytoplasm);GO:0016020(membrane);GO:0006351(transcription, DNA-templated);GO:0006355(regulation of transcription, DNA-templated);GO:0005515(protein binding);GO:0031047(gene silencing by RNA);GO:0006977(DNA damage response, signal transduction by p53 class mediator resulting in cell cycle arrest);GO:0005829(cytosol);GO:0000289(nuclear-transcribed mRNA poly(A) tail sho…	03018(RNA degradation)	NA	NA	CCR4-NOT transcription complex subunit 10 [Source:HGNC Symbol;Acc:HGNC:23817]	0	0	3.27907	0	-inf	-inf	1	1
chr1	-	87805286	87808372	ENST00000623157	TEC	1	3087	ENSG00000279778	AL445437.1	NA	NA	NA	NA	NA	0	0	0	0.005406	-inf	-inf	1	1
chr17	+	60677887	60889742	ENST00000592848	nonsense_mediated_decay	11	918	ENSG00000141376	BCAS3	GO:0005730(nucleolus);GO:0005634(nucleus);GO:0005737(cytoplasm);GO:0006351(transcription, DNA-templated);GO:0006355(regulation of transcription, DNA-templated);GO:0005856(cytoskeleton);GO:0005515(protein binding);GO:0045944(positive regulation of transcription from RNA polymerase II promoter);GO:2000114(regulation of establishment of cell polarity);GO:0031252(cell leading edge);GO:0043547(positiv…	NA	NA	NA	BCAS3, microtubule associated cell migration factor [Source:HGNC Symbol;Acc:HGNC:14347]	0	0	0.006153	0.043685	-inf	-inf	1	1
chr12	+	64824572	64875788	ENST00000539867	protein_coding	12	2594	ENSG00000111490	TBC1D30	GO:0005829(cytosol);GO:0005886(plasma membrane);GO:0016020(membrane);GO:0005096(GTPase activator activity);GO:0006886(intracellular protein transport);GO:0031338(regulation of vesicle fusion);GO:0090630(activation of GTPase activity);GO:0012505(endomembrane system);GO:0005929(cilium);GO:0043547(positive regulation of GTPase activity);GO:0036064(ciliary basal body);GO:0017137(Rab GTPase binding);G…	NA	NA	NA	TBC1 domain family member 30 [Source:HGNC Symbol;Acc:HGNC:29164]	0	0	0	0.010473	-inf	-inf	1	1
chr9	-	14087674	14300231	ENST00000636735	protein_coding	9	1471	ENSG00000147862	NFIB	GO:0005634(nucleus);GO:0006355(regulation of transcription, DNA-templated);GO:0006366(transcription from RNA polymerase II promoter);GO:0006351(transcription, DNA-templated);GO:0003677(DNA binding);GO:0003700(transcription factor activity, sequence-specific DNA binding);GO:0005622(intracellular);GO:0001650(fibrillar center);GO:0006260(DNA replication);GO:0000978(RNA polymerase II core promoter pr…	NA	NA	NA	nuclear factor I B [Source:HGNC Symbol;Acc:HGNC:7785]	0	0	0.002611	0	-inf	-inf	1	1
chr17	+	60677879	60709266	ENST00000588532	nonsense_mediated_decay	7	594	ENSG00000141376	BCAS3	GO:0005730(nucleolus);GO:0005634(nucleus);GO:0005737(cytoplasm);GO:0006351(transcription, DNA-templated);GO:0006355(regulation of transcription, DNA-templated);GO:0005856(cytoskeleton);GO:0005515(protein binding);GO:0045944(positive regulation of transcription from RNA polymerase II promoter);GO:2000114(regulation of establishment of cell polarity);GO:0031252(cell leading edge);GO:0043547(positiv…	NA	NA	NA	BCAS3, microtubule associated cell migration factor [Source:HGNC Symbol;Acc:HGNC:14347]	0	0	0.000193	0.035282	-inf	-inf	1	1
chr11	-	224222	236339	ENST00000529055	nonsense_mediated_decay	5	779	ENSG00000142082	SIRT3	GO:0008270(zinc ion binding);GO:0046872(metal ion binding);GO:0016787(hydrolase activity);GO:0016575(histone deacetylation);GO:0070403(NAD+ binding);GO:0006476(protein deacetylation);GO:0005739(mitochondrion);GO:0017136(NAD-dependent histone deacetylase activity);GO:0005515(protein binding);GO:0005759(mitochondrial matrix);GO:0007005(mitochondrion organization);GO:0003950(NAD+ ADP-ribosyltransfer…	05230(Central carbon metabolism in cancer)	NA	NA	sirtuin 3 [Source:HGNC Symbol;Acc:HGNC:14931]	0	0	0.409217	0	-inf	-inf	1	1
chr16	+	57020713	57083519	ENST00000539144	protein_coding	46	6505	ENSG00000140853	NLRC5	GO:0045944(positive regulation of transcription from RNA polymerase II promoter);GO:0005634(nucleus);GO:0005737(cytoplasm);GO:0000166(nucleotide binding);GO:0005524(ATP binding);GO:0005813(centrosome);GO:0002376(immune system process);GO:0045087(innate immune response);GO:0051607(defense response to virus);GO:0005515(protein binding);GO:0005829(cytosol);GO:0060335(positive regulation of interfero…	NA	NA	NA	NLR family CARD domain containing 5 [Source:HGNC Symbol;Acc:HGNC:29933]	0	0	0	0.090294	-inf	-inf	1	1
chrY	+	19567382	19604120	ENST00000445715	transcribed_unprocessed_pseudogene	11	1915	ENSG00000131002	TXLNGY	NA	NA	NA	NA	taxilin gamma pseudogene, Y-linked [Source:HGNC Symbol;Acc:HGNC:18473]	0	0	0	0.07631	-inf	-inf	1	1
chr18	+	31318089	31357029	ENST00000257192	protein_coding	15	5045	ENSG00000134760	DSG1	GO:0016020(membrane);GO:0016021(integral component of membrane);GO:0046872(metal ion binding);GO:0005509(calcium ion binding);GO:0007155(cell adhesion);GO:0007156(homophilic cell adhesion via plasma membrane adhesion molecules);GO:0005886(plasma membrane);GO:0030054(cell junction);GO:0005829(cytosol);GO:0070062(extracellular exosome);GO:0031424(keratinization);GO:0031012(extracellular matrix);GO:…	05150(Staphylococcus aureus infection)	K07596	NA	desmoglein 1 [Source:HGNC Symbol;Acc:HGNC:3048]	0	0	0	0.020309	-inf	-inf	1	1
chrX	+	27517884	27519759	ENST00000367074	processed_pseudogene	2	1545	ENSG00000238247	AC006210.2	NA	NA	NA	NA	NA	0	0	0	0.137342	-inf	-inf	1	1
chr1	+	205504597	205531762	ENST00000504648	nonsense_mediated_decay	15	2435	ENSG00000117266	CDK18	GO:0000166(nucleotide binding);GO:0004672(protein kinase activity);GO:0004674(protein serine/threonine kinase activity);GO:0005524(ATP binding);GO:0006468(protein phosphorylation);GO:0016740(transferase activity);GO:0016301(kinase activity);GO:0016310(phosphorylation);GO:0005515(protein binding);GO:0005634(nucleus);GO:0005737(cytoplasm);GO:0005575(cellular_component)	NA	NA	NA	cyclin dependent kinase 18 [Source:HGNC Symbol;Acc:HGNC:8751]	0	0	0.217365	0	-inf	-inf	1	1
chr2	-	85839282	85888881	ENST00000640314	nonsense_mediated_decay	8	2129	ENSG00000115525	ST3GAL5	GO:0016020(membrane);GO:0016021(integral component of membrane);GO:0016740(transferase activity);GO:0008373(sialyltransferase activity);GO:0016757(transferase activity, transferring glycosyl groups);GO:0006486(protein glycosylation);GO:0097503(sialylation);GO:0005794(Golgi apparatus);GO:0000139(Golgi membrane);GO:0005887(integral component of plasma membrane);GO:0005975(carbohydrate metabolic pro…	00604(Glycosphingolipid biosynthesis - ganglio series)	NA	NA	ST3 beta-galactoside alpha-2,3-sialyltransferase 5 [Source:HGNC Symbol;Acc:HGNC:10872]	0	0	1.29279	0	-inf	-inf	1	1
chr3	+	8501823	8548863	ENST00000415597	protein_coding	5	870	ENSG00000071282	LMCD1	GO:0005615(extracellular space);GO:0005634(nucleus);GO:0005737(cytoplasm);GO:0008270(zinc ion binding);GO:0046872(metal ion binding);GO:0006351(transcription, DNA-templated);GO:0006355(regulation of transcription, DNA-templated);GO:0003714(transcription corepressor activity);GO:0005654(nucleoplasm);GO:0044267(cellular protein metabolic process);GO:0031012(extracellular matrix);GO:0070886(positive…	NA	NA	NA	LIM and cysteine rich domains 1 [Source:HGNC Symbol;Acc:HGNC:6633]	0	0	0.02538	0	-inf	-inf	1	1
chr15	-	73561910	73633244	ENST00000563691	protein_coding	8	1214	ENSG00000156642	NPTN	GO:0016020(membrane);GO:0016021(integral component of membrane);GO:0007155(cell adhesion);GO:0005886(plasma membrane);GO:0007399(nervous system development);GO:0001934(positive regulation of protein phosphorylation);GO:0009986(cell surface);GO:0007204(positive regulation of cytosolic calcium ion concentration);GO:0010976(positive regulation of neuron projection development);GO:0060291(long-term s…	NA	NA	NA	neuroplastin [Source:HGNC Symbol;Acc:HGNC:17867]	0	0	0.025217	0	-inf	-inf	1	1
chr1	+	30843823	30844110	ENST00000410852	misc_RNA	1	288	ENSG00000222784	RN7SKP91	NA	NA	NA	NA	RNA, 7SK small nuclear pseudogene 91 [Source:HGNC Symbol;Acc:HGNC:45815]	0	0	0	0.012128	-inf	-inf	1	1
chr11	+	66466958	66476009	ENST00000531856	processed_transcript	2	289	ENSG00000174516	PELI3	GO:0016740(transferase activity);GO:0016567(protein ubiquitination);GO:0006468(protein phosphorylation);GO:0005515(protein binding);GO:0008063(Toll signaling pathway);GO:0006955(immune response);GO:0061630(ubiquitin protein ligase activity);GO:0005829(cytosol);GO:0070534(protein K63-linked ubiquitination);GO:0004674(protein serine/threonine kinase activity);GO:0010804(negative regulation of tumor…	NA	NA	NA	pellino E3 ubiquitin protein ligase family member 3 [Source:HGNC Symbol;Acc:HGNC:30010]	0	0	0.062147	0	-inf	-inf	1	1
chr3	-	58564117	58577764	ENST00000394481	protein_coding	5	3465	ENSG00000168309	FAM107A	GO:0005634(nucleus);GO:0016607(nuclear speck);GO:0003674(molecular_function);GO:0040008(regulation of growth);GO:0001558(regulation of cell growth);GO:0043005(neuron projection)	NA	NA	NA	family with sequence similarity 107 member A [Source:HGNC Symbol;Acc:HGNC:30827]	0	0	0	0.017697	-inf	-inf	1	1
chr2	+	11561194	11561306	ENST00000515909	snRNA	1	113	ENSG00000251718	RNU2-13P	NA	NA	NA	NA	RNA, U2 small nuclear 13, pseudogene [Source:HGNC Symbol;Acc:HGNC:48506]	0	0	0.024879	0	-inf	-inf	1	1
chr1	-	45580892	45580996	ENST00000630128	pseudogene	2	100	ENSG00000281133	AL355480.3	NA	NA	NA	NA	NA	0	0	0	0.409033	-inf	-inf	1	1
chr1	-	243501763	243850128	ENST00000366539	protein_coding	14	5127	ENSG00000117020	AKT3	GO:0005634(nucleus);GO:0005737(cytoplasm);GO:0016020(membrane);GO:0000166(nucleotide binding);GO:0004672(protein kinase activity);GO:0004674(protein serine/threonine kinase activity);GO:0005524(ATP binding);GO:0006468(protein phosphorylation);GO:0016740(transferase activity);GO:0016301(kinase activity);GO:0016310(phosphorylation);GO:0005515(protein binding);GO:0007165(signal transduction);GO:0005…	04014(Ras signaling pathway);04015(Rap1 signaling pathway);04010(MAPK signaling pathway);04012(ErbB signaling pathway);04370(VEGF signaling pathway);04371(Apelin signaling pathway);04630(Jak-STAT signaling pathway);04668(TNF signaling pathway);04066(HIF-1 signaling pathway);04068(FoxO signaling pathway);04072(Phospholipase D signaling pathway);04071(Sphingolipid signaling pathway);04024(cAMP sign…	K04456	EC:2.7.11.1	AKT serine/threonine kinase 3 [Source:HGNC Symbol;Acc:HGNC:393]	0	0	0	0.095309	-inf	-inf	1	1
chr4	+	48831065	48861248	ENST00000396448	protein_coding	8	1306	ENSG00000109180	OCIAD1	GO:0016020(membrane);GO:0005515(protein binding);GO:0005768(endosome);GO:0005739(mitochondrion)	NA	NA	NA	OCIA domain containing 1 [Source:HGNC Symbol;Acc:HGNC:16074]	0	0	2.12742	0	-inf	-inf	1	1
chr19	+	35332016	35346766	ENST00000594250	protein_coding	11	2107	ENSG00000012124	CD22	GO:0016020(membrane);GO:0016021(integral component of membrane);GO:0030246(carbohydrate binding);GO:0007155(cell adhesion);GO:0005886(plasma membrane);GO:0005515(protein binding);GO:0070062(extracellular exosome)	04514(Cell adhesion molecules (CAMs));04640(Hematopoietic cell lineage);04662(B cell receptor signaling pathway)	NA	NA	CD22 molecule [Source:HGNC Symbol;Acc:HGNC:1643]	0	0	0.016399	0	-inf	-inf	1	1
chr11	+	65213876	65242355	ENST00000529062	processed_transcript	10	1939	ENSG00000197847	SLC22A20	NA	NA	NA	NA	solute carrier family 22 member 20 [Source:HGNC Symbol;Acc:HGNC:29867]	0	0	0.063499	0	-inf	-inf	1	1
chr22	+	23856703	23886309	ENST00000345044	protein_coding	12	3219	ENSG00000133460	SLC2A11	GO:0006810(transport);GO:0016020(membrane);GO:0016021(integral component of membrane);GO:0005215(transporter activity);GO:0055085(transmembrane transport);GO:0005634(nucleus);GO:0005886(plasma membrane);GO:0030054(cell junction);GO:0022857(transmembrane transporter activity);GO:0022891(substrate-specific transmembrane transporter activity);GO:0008643(carbohydrate transport);GO:0008645(hexose tran…	NA	NA	NA	solute carrier family 2 member 11 [Source:HGNC Symbol;Acc:HGNC:14239]	0	0	0.033587	0	-inf	-inf	1	1
chr2	+	26308547	26373506	ENST00000442141	protein_coding	5	504	ENSG00000138018	SELENOI	GO:0016020(membrane);GO:0016021(integral component of membrane);GO:0016740(transferase activity);GO:0016780(phosphotransferase activity, for other substituted phosphate groups);GO:0008654(phospholipid biosynthetic process);GO:0046872(metal ion binding);GO:0006629(lipid metabolic process);GO:0006646(phosphatidylethanolamine biosynthetic process);GO:0005789(endoplasmic reticulum membrane);GO:190395…	00564(Glycerophospholipid metabolism);00565(Ether lipid metabolism);00440(Phosphonate and phosphinate metabolism)	NA	NA	selenoprotein I [Source:HGNC Symbol;Acc:HGNC:29361]	0	0	0.137362	0	-inf	-inf	1	1
chr13	-	27667540	27680566	ENST00000611364	lincRNA	3	862	ENSG00000273552	AL136439.1	NA	NA	NA	NA	NA	0	0	0.104622	0	-inf	-inf	1	1
chr7	-	126438693	126447188	ENST00000495315	processed_transcript	3	831	ENSG00000179603	GRM8	GO:0016020(membrane);GO:0016021(integral component of membrane);GO:0004930(G-protein coupled receptor activity);GO:0007186(G-protein coupled receptor signaling pathway);GO:0005886(plasma membrane);GO:0004871(signal transducer activity);GO:0007165(signal transduction);GO:0007608(sensory perception of smell);GO:0050896(response to stimulus);GO:0005887(integral component of plasma membrane);GO:00076…	04072(Phospholipase D signaling pathway);04080(Neuroactive ligand-receptor interaction);04724(Glutamatergic synapse)	NA	NA	glutamate metabotropic receptor 8 [Source:HGNC Symbol;Acc:HGNC:4600]	0	0	0	0.005356	-inf	-inf	1	1
chr14	-	24292212	24299692	ENST00000559483	processed_transcript	5	629	ENSG00000157379	DHRS1	GO:0016491(oxidoreductase activity);GO:0055114(oxidation-reduction process);GO:0005515(protein binding);GO:0005783(endoplasmic reticulum);GO:0005739(mitochondrion);GO:0005743(mitochondrial inner membrane)	NA	NA	NA	dehydrogenase/reductase 1 [Source:HGNC Symbol;Acc:HGNC:16445]	0	0	0.133762	0	-inf	-inf	1	1
chr3	+	43087479	43088068	ENST00000457115	lincRNA	2	509	ENSG00000227245	AC092042.1	NA	NA	NA	NA	NA	0	0	0.189655	0.379756	-inf	-inf	1	1
chr9	-	35809795	35812188	ENST00000484764	protein_coding	7	1618	ENSG00000137098	SPAG8	GO:0005634(nucleus);GO:0005737(cytoplasm);GO:0016020(membrane);GO:0005856(cytoskeleton);GO:0005515(protein binding);GO:0007049(cell cycle);GO:0008017(microtubule binding);GO:0030154(cell differentiation);GO:0031410(cytoplasmic vesicle);GO:0007283(spermatogenesis);GO:0005819(spindle);GO:0003674(molecular_function);GO:0008150(biological_process);GO:0045944(positive regulation of transcription from …	NA	NA	NA	sperm associated antigen 8 [Source:HGNC Symbol;Acc:HGNC:14105]	0	0	0	0.029055	-inf	-inf	1	1
chr9	+	558826	558930	ENST00000365302	snRNA	1	105	ENSG00000202172	RNU6-1327P	NA	NA	NA	NA	RNA, U6 small nuclear 1327, pseudogene [Source:HGNC Symbol;Acc:HGNC:48290]	0	0	0	0.194049	-inf	-inf	1	1
chr11	-	108528163	108568126	ENST00000531386	protein_coding	4	555	ENSG00000110723	EXPH5	GO:0006886(intracellular protein transport);GO:0017137(Rab GTPase binding);GO:0005768(endosome);GO:0045921(positive regulation of exocytosis);GO:0071985(multivesicular body sorting pathway);GO:0050714(positive regulation of protein secretion);GO:0003334(keratinocyte development)	NA	NA	NA	exophilin 5 [Source:HGNC Symbol;Acc:HGNC:30578]	0	0	0.199686	0.098857	-inf	-inf	1	1
chr10	-	95315025	95441162	ENST00000361941	protein_coding	31	3940	ENSG00000095637	SORBS1	GO:0046326(positive regulation of glucose import);GO:0006810(transport);GO:0005634(nucleus);GO:0005737(cytoplasm);GO:0016020(membrane);GO:0007015(actin filament organization);GO:0009967(positive regulation of signal transduction);GO:0005886(plasma membrane);GO:0005925(focal adhesion);GO:0005813(centrosome);GO:0005856(cytoskeleton);GO:0005515(protein binding);GO:0030054(cell junction);GO:0045121(m…	04520(Adherens junction);04910(Insulin signaling pathway);03320(PPAR signaling pathway)	K06086	NA	sorbin and SH3 domain containing 1 [Source:HGNC Symbol;Acc:HGNC:14565]	0	0	0	0.000553	-inf	-inf	1	1
chr1	+	225964179	225964428	ENST00000423475	processed_pseudogene	1	250	ENSG00000213032	NDUFA3P3	NA	NA	NA	NA	NADH:ubiquinone oxidoreductase subunit A3 pseudogene 3 [Source:HGNC Symbol;Acc:HGNC:45052]	0	0	0.355835	0	-inf	-inf	1	1
chr15	-	78921769	78945062	ENST00000525807	nonsense_mediated_decay	8	1122	ENSG00000103811	CTSH	GO:0043231(intracellular membrane-bounded organelle);GO:0005829(cytosol);GO:0016787(hydrolase activity);GO:0008233(peptidase activity);GO:0008234(cysteine-type peptidase activity);GO:0006508(proteolysis);GO:0005615(extracellular space);GO:0000932(P-body);GO:0005764(lysosome);GO:0004177(aminopeptidase activity);GO:0002250(adaptive immune response);GO:0005576(extracellular region);GO:0004252(serine…	04142(Lysosome);04210(Apoptosis)	NA	NA	cathepsin H [Source:HGNC Symbol;Acc:HGNC:2535]	0	0	4.81246	0	-inf	-inf	1	1
chr6	+	159240786	159243329	ENST00000419703	sense_intronic	2	516	ENSG00000235086	FNDC1-IT1	NA	NA	NA	NA	FNDC1 intronic transcript 1 [Source:HGNC Symbol;Acc:HGNC:41460]	0	0	0	0.113571	-inf	-inf	1	1
chr3	-	18417576	18444873	ENST00000493952	protein_coding	3	626	ENSG00000182568	SATB1	GO:0005634(nucleus);GO:0005654(nucleoplasm);GO:0006351(transcription, DNA-templated);GO:0006355(regulation of transcription, DNA-templated);GO:0016569(covalent chromatin modification);GO:0003677(DNA binding);GO:0005515(protein binding);GO:0016604(nuclear body);GO:0016032(viral process);GO:0016363(nuclear matrix);GO:0016605(PML body);GO:0097194(execution phase of apoptosis);GO:0000977(RNA polymera…	NA	NA	NA	SATB homeobox 1 [Source:HGNC Symbol;Acc:HGNC:10541]	0	0	0	0.013329	-inf	-inf	1	1
chr15	-	42427591	42427697	ENST00000364207	snRNA	1	107	ENSG00000201077	RNU6-188P	NA	NA	NA	NA	RNA, U6 small nuclear 188, pseudogene [Source:HGNC Symbol;Acc:HGNC:47151]	0	0	0	0.776197	-inf	-inf	1	1
chr2	+	156473592	156510834	ENST00000430992	nonsense_mediated_decay	5	496	ENSG00000115159	GPD2	GO:0016491(oxidoreductase activity);GO:0055114(oxidation-reduction process);GO:0006072(glycerol-3-phosphate metabolic process);GO:0009331(glycerol-3-phosphate dehydrogenase complex);GO:0004368(glycerol-3-phosphate dehydrogenase activity);GO:0052590(sn-glycerol-3-phosphate:ubiquinone oxidoreductase activity);GO:0052591(sn-glycerol-3-phosphate:ubiquinone-8 oxidoreductase activity);GO:0046872(metal …	00564(Glycerophospholipid metabolism)	NA	NA	glycerol-3-phosphate dehydrogenase 2 [Source:HGNC Symbol;Acc:HGNC:4456]	0	0	0.011282	0	-inf	-inf	1	1
chr2	-	26581202	26641368	ENST00000288861	protein_coding	7	773	ENSG00000157884	CIB4	GO:0046872(metal ion binding);GO:0005509(calcium ion binding);GO:0000287(magnesium ion binding);GO:0005515(protein binding)	NA	NA	NA	calcium and integrin binding family member 4 [Source:HGNC Symbol;Acc:HGNC:33703]	0	0	0.02175	0	-inf	-inf	1	1
chr7	+	122328492	122331138	ENST00000626241	antisense_RNA	2	498	ENSG00000240499	AC004594.1	NA	NA	NA	NA	NA	0	0	0.290183	0.105102	-inf	-inf	1	1
chr2	-	114005440	114005655	ENST00000390880	snoRNA	1	216	ENSG00000212182	U3	NA	NA	NA	NA	Small nucleolar RNA U3 [Source:RFAM;Acc:RF00012]	0	0	0	0.032341	-inf	-inf	1	1
chr17	-	41513746	41521719	ENST00000393976	protein_coding	10	2394	ENSG00000171346	KRT15	GO:0005634(nucleus);GO:0005198(structural molecule activity);GO:0005515(protein binding);GO:0007010(cytoskeleton organization);GO:0005882(intermediate filament);GO:0005829(cytosol);GO:0070062(extracellular exosome);GO:0031424(keratinization);GO:0005200(structural constituent of cytoskeleton);GO:0097110(scaffold protein binding);GO:0008544(epidermis development);GO:0070268(cornification)	NA	NA	NA	keratin 15 [Source:HGNC Symbol;Acc:HGNC:6421]	0	0	0	0.658605	-inf	-inf	1	1
chr15	-	64181176	64204581	ENST00000634909	protein_coding	4	615	ENSG00000169118	CSNK1G1	GO:0005737(cytoplasm);GO:0000166(nucleotide binding);GO:0004672(protein kinase activity);GO:0004674(protein serine/threonine kinase activity);GO:0005524(ATP binding);GO:0006468(protein phosphorylation);GO:0005829(cytosol);GO:0016740(transferase activity);GO:0016301(kinase activity);GO:0016310(phosphorylation);GO:0005515(protein binding);GO:0016055(Wnt signaling pathway);GO:0005634(nucleus);GO:000…	04340(Hedgehog signaling pathway)	NA	NA	casein kinase 1 gamma 1 [Source:HGNC Symbol;Acc:HGNC:2454]	0	0	0	0.475857	-inf	-inf	1	1
chr1	+	173555251	173612772	ENST00000431459	antisense_RNA	3	677	ENSG00000238272	AL139142.1	NA	NA	NA	NA	NA	0	0	0	0.113219	-inf	-inf	1	1
chr20	+	18288283	18316994	ENST00000535822	protein_coding	3	2341	ENSG00000125846	ZNF133	GO:0003676(nucleic acid binding);GO:0005634(nucleus);GO:0046872(metal ion binding);GO:0006355(regulation of transcription, DNA-templated);GO:0006351(transcription, DNA-templated);GO:0003677(DNA binding);GO:0005622(intracellular);GO:0005515(protein binding);GO:0003700(transcription factor activity, sequence-specific DNA binding)	NA	NA	NA	zinc finger protein 133 [Source:HGNC Symbol;Acc:HGNC:12917]	0	0	0.610304	0.257699	-inf	-inf	1	1
chr1	-	235190034	235190116	ENST00000585119	miRNA	1	83	ENSG00000263439	MIR4753	NA	NA	NA	NA	microRNA 4753 [Source:HGNC Symbol;Acc:HGNC:41527]	0	0	0.111292	0	-inf	-inf	1	1
chr17	-	63698609	63701172	ENST00000584645	protein_coding	5	566	ENSG00000136490	LIMD2	GO:0005634(nucleus);GO:0005737(cytoplasm);GO:0046872(metal ion binding);GO:0005515(protein binding)	NA	NA	NA	LIM domain containing 2 [Source:HGNC Symbol;Acc:HGNC:28142]	0	0	0.150199	0	-inf	-inf	1	1
chr9	-	95468938	95480485	ENST00000375271	protein_coding	8	1058	ENSG00000185920	PTCH1	GO:0048471(perinuclear region of cytoplasm);GO:0043433(negative regulation of sequence-specific DNA binding transcription factor activity);GO:0016020(membrane);GO:0016021(integral component of membrane);GO:0005515(protein binding);GO:0007224(smoothened signaling pathway);GO:0060037(pharyngeal system development);GO:0005886(plasma membrane);GO:0000122(negative regulation of transcription from RNA …	04340(Hedgehog signaling pathway);04024(cAMP signaling pathway);04360(Axon guidance);05200(Pathways in cancer);05205(Proteoglycans in cancer);05217(Basal cell carcinoma)	NA	NA	patched 1 [Source:HGNC Symbol;Acc:HGNC:9585]	0	0	0.826211	0.252993	-inf	-inf	1	1
chr1	-	64973658	64990841	ENST00000635626	retained_intron	2	2465	ENSG00000226891	LINC01359	NA	NA	NA	NA	long intergenic non-protein coding RNA 1359 [Source:HGNC Symbol;Acc:HGNC:50591]	0	0	0	0.017004	-inf	-inf	1	1
chr17	+	39986609	39997955	ENST00000540504	protein_coding	4	458	ENSG00000108344	PSMD3	GO:0005634(nucleus);GO:0016020(membrane);GO:0005515(protein binding);GO:0000502(proteasome complex);GO:0038095(Fc-epsilon receptor signaling pathway);GO:0005576(extracellular region);GO:0030234(enzyme regulator activity);GO:0042176(regulation of protein catabolic process);GO:0005654(nucleoplasm);GO:0005829(cytosol);GO:0070062(extracellular exosome);GO:0000165(MAPK cascade);GO:0000209(protein poly…	03050(Proteasome);05169(Epstein-Barr virus infection)	NA	NA	proteasome 26S subunit, non-ATPase 3 [Source:HGNC Symbol;Acc:HGNC:9560]	0	0	1.53507	0.668511	-inf	-inf	1	1
chr3	-	36880184	36880729	ENST00000441346	processed_pseudogene	1	546	ENSG00000234073	AC011816.1	NA	NA	NA	NA	NA	0	0	0	0.003199	-inf	-inf	1	1
chr3	+	9750087	9766112	ENST00000383826	protein_coding	4	1069	ENSG00000114026	OGG1	GO:0005634(nucleus);GO:0016607(nuclear speck);GO:0005654(nucleoplasm);GO:0016787(hydrolase activity);GO:0006355(regulation of transcription, DNA-templated);GO:0003824(catalytic activity);GO:0016829(lyase activity);GO:0005739(mitochondrion);GO:0003684(damaged DNA binding);GO:0006281(DNA repair);GO:0008152(metabolic process);GO:0016798(hydrolase activity, acting on glycosyl bonds);GO:0006974(cellul…	03410(Base excision repair)	K03660	EC:3.2.2.- 4.2.99.18	8-oxoguanine DNA glycosylase [Source:HGNC Symbol;Acc:HGNC:8125]	0	0	0	1.07369	-inf	-inf	1	1
chr16	+	50712194	50723374	ENST00000534057	protein_coding	5	506	ENSG00000167207	NOD2	GO:0042981(regulation of apoptotic process);GO:0070374(positive regulation of ERK1 and ERK2 cascade);GO:0032755(positive regulation of interleukin-6 production);GO:0005737(cytoplasm);GO:0016020(membrane);GO:0005794(Golgi apparatus);GO:0000166(nucleotide binding);GO:0005524(ATP binding);GO:0005829(cytosol);GO:0003779(actin binding);GO:0005886(plasma membrane);GO:0005856(cytoskeleton);GO:0005515(pr…	04668(TNF signaling pathway);04621(NOD-like receptor signaling pathway);05321(Inflammatiory bowel disease (IBD));05131(Shigellosis);05152(Tuberculosis)	NA	NA	nucleotide binding oligomerization domain containing 2 [Source:HGNC Symbol;Acc:HGNC:5331]	0	0	0.515513	0.225571	-inf	-inf	1	1
chr19	-	50906934	50909328	ENST00000431178	protein_coding	3	481	ENSG00000167749	KLK4	GO:0016787(hydrolase activity);GO:0008233(peptidase activity);GO:0006508(proteolysis);GO:0004252(serine-type endopeptidase activity);GO:0008236(serine-type peptidase activity);GO:0022617(extracellular matrix disassembly);GO:0030163(protein catabolic process);GO:0097186(amelogenesis);GO:0046872(metal ion binding);GO:0005515(protein binding);GO:0005576(extracellular region);GO:0031214(biomineral ti…	NA	NA	NA	kallikrein related peptidase 4 [Source:HGNC Symbol;Acc:HGNC:6365]	0	0	0.102014	0	-inf	-inf	1	1
chr3	+	37243270	37302769	ENST00000617480	protein_coding	11	1545	ENSG00000144674	GOLGA4	GO:0005737(cytoplasm);GO:0016020(membrane);GO:0005794(Golgi apparatus);GO:0043231(intracellular membrane-bounded organelle);GO:0005829(cytosol);GO:0005515(protein binding);GO:0000139(Golgi membrane);GO:0000042(protein targeting to Golgi);GO:0045773(positive regulation of axon extension);GO:0070062(extracellular exosome);GO:0016192(vesicle-mediated transport);GO:0005802(trans-Golgi network);GO:005…	NA	NA	NA	golgin A4 [Source:HGNC Symbol;Acc:HGNC:4427]	0	0	0	0.048043	-inf	-inf	1	1
chr3	-	15560704	15601852	ENST00000628377	protein_coding	16	2214	ENSG00000131373	HACL1	GO:0043231(intracellular membrane-bounded organelle);GO:0046872(metal ion binding);GO:0000287(magnesium ion binding);GO:0003824(catalytic activity);GO:0016829(lyase activity);GO:0006631(fatty acid metabolic process);GO:0005515(protein binding);GO:0048037(cofactor binding);GO:0005777(peroxisome);GO:0042802(identical protein binding);GO:0030976(thiamine pyrophosphate binding);GO:0005102(receptor bi…	04146(Peroxisome)	NA	NA	2-hydroxyacyl-CoA lyase 1 [Source:HGNC Symbol;Acc:HGNC:17856]	0	0	0	1.15922	-inf	-inf	1	1
chr21	-	41800994	41879482	ENST00000269844	protein_coding	31	4881	ENSG00000141956	PRDM15	GO:0003676(nucleic acid binding);GO:0005654(nucleoplasm);GO:0016604(nuclear body);GO:0005634(nucleus);GO:0046872(metal ion binding);GO:0008168(methyltransferase activity);GO:0016740(transferase activity);GO:0032259(methylation);GO:0006351(transcription, DNA-templated);GO:0006355(regulation of transcription, DNA-templated);GO:0003677(DNA binding)	NA	NA	NA	PR/SET domain 15 [Source:HGNC Symbol;Acc:HGNC:13999]	0	0	0	0.014191	-inf	-inf	1	1
chr14	-	44876874	44897077	ENST00000554389	antisense_RNA	2	693	ENSG00000258633	AL049870.2	NA	NA	NA	NA	NA	0	0	0	0.036962	-inf	-inf	1	1
chr4	-	175633447	176002664	ENST00000506894	protein_coding	7	2614	ENSG00000150625	GPM6A	GO:0016020(membrane);GO:0016021(integral component of membrane);GO:0005886(plasma membrane);GO:0042995(cell projection);GO:0005515(protein binding);GO:0007399(nervous system development);GO:0070588(calcium ion transmembrane transport);GO:0030424(axon);GO:0048812(neuron projection morphogenesis);GO:0030175(filopodium);GO:0044295(axonal growth cone);GO:0070062(extracellular exosome);GO:0048863(stem…	NA	NA	NA	glycoprotein M6A [Source:HGNC Symbol;Acc:HGNC:4460]	0	0	0	0.593959	-inf	-inf	1	1
chr11	+	31509770	31784573	ENST00000640081	nonsense_mediated_decay	11	2385	ENSG00000109911	ELP4	GO:0000993(RNA polymerase II core binding);GO:0005634(nucleus);GO:0005737(cytoplasm);GO:0005654(nucleoplasm);GO:0006351(transcription, DNA-templated);GO:0006355(regulation of transcription, DNA-templated);GO:0005515(protein binding);GO:0045859(regulation of protein kinase activity);GO:0033588(Elongator holoenzyme complex);GO:0006357(regulation of transcription from RNA polymerase II promoter);GO:…	NA	NA	NA	elongator acetyltransferase complex subunit 4 [Source:HGNC Symbol;Acc:HGNC:1171]	0	0	0	0.040466	-inf	-inf	1	1
chr16	-	3300267	3305705	ENST00000573608	protein_coding	2	555	ENSG00000140993	TIGD7	GO:0003676(nucleic acid binding);GO:0005634(nucleus);GO:0003677(DNA binding);GO:0005515(protein binding)	NA	NA	NA	tigger transposable element derived 7 [Source:HGNC Symbol;Acc:HGNC:18331]	0	0	0	0.076537	-inf	-inf	1	1
chr16	-	68361134	68372258	ENST00000563226	protein_coding	7	2093	ENSG00000103056	SMPD3	GO:0016020(membrane);GO:0046872(metal ion binding);GO:0016787(hydrolase activity);GO:0005794(Golgi apparatus);GO:0006629(lipid metabolic process);GO:0005886(plasma membrane);GO:0007049(cell cycle);GO:0000139(Golgi membrane);GO:0007275(multicellular organism development);GO:0006665(sphingolipid metabolic process);GO:0006687(glycosphingolipid metabolic process);GO:0004767(sphingomyelin phosphodiest…	00600(Sphingolipid metabolism)	K12352	EC:3.1.4.12	sphingomyelin phosphodiesterase 3 [Source:HGNC Symbol;Acc:HGNC:14240]	0	0	0	0.01621	-inf	-inf	1	1
chr1	+	212615022	212619266	ENST00000336937	protein_coding	4	482	ENSG00000162772	ATF3	GO:0005634(nucleus);GO:0005730(nucleolus);GO:0006355(regulation of transcription, DNA-templated);GO:0003677(DNA binding);GO:0006357(regulation of transcription from RNA polymerase II promoter);GO:0003700(transcription factor activity, sequence-specific DNA binding);GO:0006366(transcription from RNA polymerase II promoter);GO:0006351(transcription, DNA-templated);GO:0005515(protein binding);GO:004…	05166(HTLV-I infection)	K09032	NA	activating transcription factor 3 [Source:HGNC Symbol;Acc:HGNC:785]	0	0	0	0.021375	-inf	-inf	1	1
chrX	-	72495194	72572627	ENST00000421523	protein_coding	5	592	ENSG00000147099	HDAC8	GO:0005634(nucleus);GO:0005737(cytoplasm);GO:0046872(metal ion binding);GO:0004407(histone deacetylase activity);GO:0016787(hydrolase activity);GO:0032041(NAD-dependent histone deacetylase activity (H3-K14 specific));GO:0006351(transcription, DNA-templated);GO:0006355(regulation of transcription, DNA-templated);GO:0016569(covalent chromatin modification);GO:0070932(histone H3 deacetylation);GO:00…	05203(Viral carcinogenesis);05034(Alcoholism);05165(Human papillomavirus infection)	NA	NA	histone deacetylase 8 [Source:HGNC Symbol;Acc:HGNC:13315]	0	0	0.155123	0	-inf	-inf	1	1
chr9	-	137434364	137441449	ENST00000371506	protein_coding	10	2222	ENSG00000188833	ENTPD8	GO:0016020(membrane);GO:0016021(integral component of membrane);GO:0046872(metal ion binding);GO:0000166(nucleotide binding);GO:0005524(ATP binding);GO:0016787(hydrolase activity);GO:0005886(plasma membrane);GO:0017110(nucleoside-diphosphatase activity);GO:0034656(nucleobase-containing small molecule catabolic process);GO:0017111(nucleoside-triphosphatase activity);GO:0102490(8-oxo-dGTP phosphohy…	00230(Purine metabolism);00240(Pyrimidine metabolism);05169(Epstein-Barr virus infection)	K01510	EC:3.6.1.5	ectonucleoside triphosphate diphosphohydrolase 8 [Source:HGNC Symbol;Acc:HGNC:24860]	0	0	0.722291	0	-inf	-inf	1	1
chr12	+	122183117	122203471	ENST00000339777	protein_coding	12	2028	ENSG00000158113	LRRC43	NA	NA	NA	NA	leucine rich repeat containing 43 [Source:HGNC Symbol;Acc:HGNC:28562]	0	0	0	0.023897	-inf	-inf	1	1
chr14	+	80822524	80822796	ENST00000555320	processed_pseudogene	1	273	ENSG00000258452	AC022404.1	NA	NA	NA	NA	NA	0	0	0	0.111596	-inf	-inf	1	1
chr1	+	64941979	64942365	ENST00000446914	processed_pseudogene	1	387	ENSG00000233877	AL606517.1	NA	NA	NA	NA	NA	0	0	0.068493	0.174494	-inf	-inf	1	1
chr1	-	21272746	21298999	ENST00000481130	protein_coding	4	578	ENSG00000117298	ECE1	GO:0048471(perinuclear region of cytoplasm);GO:0016020(membrane);GO:0016021(integral component of membrane);GO:0046872(metal ion binding);GO:0016787(hydrolase activity);GO:0005765(lysosomal membrane);GO:0008270(zinc ion binding);GO:0005886(plasma membrane);GO:0005515(protein binding);GO:0008233(peptidase activity);GO:0006508(proteolysis);GO:0004222(metalloendopeptidase activity);GO:0008237(metall…	NA	NA	NA	endothelin converting enzyme 1 [Source:HGNC Symbol;Acc:HGNC:3146]	0	0	0	0.054357	-inf	-inf	1	1
chr17	+	20938520	20994292	ENST00000580056	antisense_RNA	4	521	ENSG00000233098	CCDC144NL-AS1	NA	NA	NA	NA	CCDC144NL antisense RNA 1 [Source:HGNC Symbol;Acc:HGNC:51340]	0	0	0	0.048792	-inf	-inf	1	1
chr15	+	82262826	82264889	ENST00000566861	protein_coding	3	404	ENSG00000188659	SAXO2	GO:0008017(microtubule binding)	NA	NA	NA	stabilizer of axonemal microtubules 2 [Source:HGNC Symbol;Acc:HGNC:33727]	0	0	0.316076	0	-inf	-inf	1	1
chr22	-	41074180	41075239	ENST00000423293	processed_pseudogene	1	1060	ENSG00000213857	AL080243.1	NA	NA	NA	NA	NA	0	0	0	0.019588	-inf	-inf	1	1
chr8	-	13083361	13514886	ENST00000276297	protein_coding	18	7447	ENSG00000164741	DLC1	GO:0005634(nucleus);GO:0005737(cytoplasm);GO:0016020(membrane);GO:0007165(signal transduction);GO:0005829(cytosol);GO:0035023(regulation of Rho protein signal transduction);GO:0043547(positive regulation of GTPase activity);GO:0005515(protein binding);GO:0008289(lipid binding);GO:0006915(apoptotic process);GO:0005901(caveola);GO:0030054(cell junction);GO:0005096(GTPase activator activity);GO:0005…	NA	NA	NA	DLC1 Rho GTPase activating protein [Source:HGNC Symbol;Acc:HGNC:2897]	0	0	0	0.003309	-inf	-inf	1	1
chr2	-	24836953	24872692	ENST00000427849	protein_coding	7	894	ENSG00000138031	ADCY3	GO:0005737(cytoplasm);GO:0016020(membrane);GO:0016021(integral component of membrane);GO:0046872(metal ion binding);GO:0000166(nucleotide binding);GO:0005524(ATP binding);GO:0035556(intracellular signal transduction);GO:0016829(lyase activity);GO:0005886(plasma membrane);GO:0005794(Golgi apparatus);GO:0042995(cell projection);GO:0007608(sensory perception of smell);GO:0050896(response to stimulus…	00230(Purine metabolism);04015(Rap1 signaling pathway);04371(Apelin signaling pathway);04020(Calcium signaling pathway);04072(Phospholipase D signaling pathway);04024(cAMP signaling pathway);04022(cGMP - PKG signaling pathway);04114(Oocyte meiosis);04540(Gap junction);04611(Platelet activation);04062(Chemokine signaling pathway);04911(Insulin secretion);04923(Regulation of lipolysis in adipocyte)…	NA	NA	adenylate cyclase 3 [Source:HGNC Symbol;Acc:HGNC:234]	0	0	0.098633	0.180384	-inf	-inf	1	1
chr19	-	19761158	19776385	ENST00000589508	lincRNA	3	432	ENSG00000266904	LINC00663	NA	NA	NA	NA	long intergenic non-protein coding RNA 663 [Source:HGNC Symbol;Acc:HGNC:28609]	0	0	0.250431	0	-inf	-inf	1	1
chr4	+	39480255	39481905	ENST00000513652	processed_transcript	2	1532	ENSG00000224097	AC021148.1	NA	NA	NA	NA	NA	0	0	0	0.063394	-inf	-inf	1	1
chr20	+	57161822	57163775	ENST00000624276	TEC	1	1954	ENSG00000280220	AL157414.3	NA	NA	NA	NA	NA	0	0	0	0.010626	-inf	-inf	1	1
chr19	+	48954929	48961795	ENST00000391871	protein_coding	5	688	ENSG00000087088	BAX	GO:0005634(nucleus);GO:0005737(cytoplasm);GO:0016020(membrane);GO:0016021(integral component of membrane);GO:0042981(regulation of apoptotic process);GO:0005829(cytosol);GO:0005739(mitochondrion);GO:0005515(protein binding);GO:0006915(apoptotic process);GO:0042802(identical protein binding);GO:0043065(positive regulation of apoptotic process);GO:0031966(mitochondrial membrane);GO:0006977(DNA dama…	04141(Protein processing in endoplasmic reticulum);04071(Sphingolipid signaling pathway);04210(Apoptosis);04215(Apoptosis - multiple species);04217(Necroptosis);04115(p53 signaling pathway);04722(Neurotrophin signaling pathway);04211(Longevity regulating pathway - mammal);05200(Pathways in cancer);05202(Transcriptional misregulation in cancers);05203(Viral carcinogenesis);05210(Colorectal cancer)…	NA	NA	BCL2 associated X, apoptosis regulator [Source:HGNC Symbol;Acc:HGNC:959]	0	0	0.455612	0	-inf	-inf	1	1
chr8	-	29150297	29263062	ENST00000523968	nonsense_mediated_decay	16	1750	ENSG00000197892	KIF13B	GO:0005737(cytoplasm);GO:0000166(nucleotide binding);GO:0005524(ATP binding);GO:0003777(microtubule motor activity);GO:0005856(cytoskeleton);GO:0042995(cell projection);GO:0005515(protein binding);GO:0007165(signal transduction);GO:0008017(microtubule binding);GO:0005874(microtubule);GO:0007018(microtubule-based movement);GO:0072383(plus-end-directed vesicle transport along microtubule);GO:003042…	NA	NA	NA	kinesin family member 13B [Source:HGNC Symbol;Acc:HGNC:14405]	0	0	0.020509	0	-inf	-inf	1	1
chr1	-	108929508	108950448	ENST00000369968	protein_coding	7	4151	ENSG00000121940	CLCC1	GO:0006810(transport);GO:0005634(nucleus);GO:0016020(membrane);GO:0016021(integral component of membrane);GO:0043231(intracellular membrane-bounded organelle);GO:0005783(endoplasmic reticulum);GO:0005794(Golgi apparatus);GO:0006811(ion transport);GO:0005254(chloride channel activity);GO:0006821(chloride transport);GO:0034707(chloride channel complex);GO:1902476(chloride transmembrane transport)	NA	NA	NA	chloride channel CLIC like 1 [Source:HGNC Symbol;Acc:HGNC:29675]	0	0	1.05485	0	-inf	-inf	1	1
chr4	+	4321962	4334182	ENST00000509015	lincRNA	3	1416	ENSG00000248516	AC105415.1	NA	NA	NA	NA	NA	0	0	0	0.032204	-inf	-inf	1	1
chr10	-	21661635	21661741	ENST00000364520	snRNA	1	107	ENSG00000201390	RNU6-1141P	NA	NA	NA	NA	RNA, U6 small nuclear 1141, pseudogene [Source:HGNC Symbol;Acc:HGNC:48104]	0	0	0.093836	0	-inf	-inf	1	1
chr5	+	173057394	173086569	ENST00000523161	protein_coding	3	559	ENSG00000164463	CREBRF	GO:0006810(transport);GO:0005634(nucleus);GO:0006355(regulation of transcription, DNA-templated);GO:0006366(transcription from RNA polymerase II promoter);GO:0006351(transcription, DNA-templated);GO:0003700(transcription factor activity, sequence-specific DNA binding);GO:0005515(protein binding);GO:0006986(response to unfolded protein);GO:0005654(nucleoplasm);GO:0001228(transcriptional activator …	NA	NA	NA	CREB3 regulatory factor [Source:HGNC Symbol;Acc:HGNC:24050]	0	0	0.158675	0.102058	-inf	-inf	1	1
chr11	+	10330660	10410838	ENST00000295663	processed_transcript	3	256	ENSG00000133805	AMPD3	GO:0003876(AMP deaminase activity);GO:0032264(IMP salvage);GO:0046872(metal ion binding);GO:0016787(hydrolase activity);GO:0019239(deaminase activity);GO:0009168(purine ribonucleoside monophosphate biosynthetic process);GO:0005515(protein binding);GO:0009117(nucleotide metabolic process);GO:0005576(extracellular region);GO:0005829(cytosol);GO:0043312(neutrophil degranulation);GO:0034774(secretory…	00230(Purine metabolism)	NA	NA	adenosine monophosphate deaminase 3 [Source:HGNC Symbol;Acc:HGNC:470]	0	0	0	0.191625	-inf	-inf	1	1
chr11	-	3361809	3379125	ENST00000524857	processed_transcript	6	542	ENSG00000005801	ZNF195	GO:0003676(nucleic acid binding);GO:0006355(regulation of transcription, DNA-templated);GO:0005622(intracellular);GO:0005634(nucleus);GO:0046872(metal ion binding);GO:0006351(transcription, DNA-templated);GO:0003677(DNA binding);GO:0008270(zinc ion binding)	NA	NA	NA	zinc finger protein 195 [Source:HGNC Symbol;Acc:HGNC:12986]	0	0	0.056244	0	-inf	-inf	1	1
chr22	-	17182641	17188727	ENST00000469063	processed_transcript	2	510	ENSG00000093072	ADA2	GO:0005615(extracellular space);GO:0046872(metal ion binding);GO:0016787(hydrolase activity);GO:0008083(growth factor activity);GO:0008270(zinc ion binding);GO:0042803(protein homodimerization activity);GO:0019239(deaminase activity);GO:0005576(extracellular region);GO:0007275(multicellular organism development);GO:0004000(adenosine deaminase activity);GO:0006154(adenosine catabolic process);GO:0…	00230(Purine metabolism)	NA	NA	adenosine deaminase 2 [Source:HGNC Symbol;Acc:HGNC:1839]	0	0	0	0.037288	-inf	-inf	1	1
chr19	-	39031285	39032767	ENST00000593847	protein_coding	3	508	ENSG00000161243	FBXO27	GO:0005515(protein binding);GO:0005829(cytosol);GO:0000209(protein polyubiquitination);GO:0043687(post-translational protein modification);GO:0004842(ubiquitin-protein transferase activity);GO:0019005(SCF ubiquitin ligase complex)	NA	NA	NA	F-box protein 27 [Source:HGNC Symbol;Acc:HGNC:18753]	0	0	0.16352	0.30901	-inf	-inf	1	1
chr19	-	11342779	11346271	ENST00000589555	protein_coding	4	788	ENSG00000105518	TMEM205	GO:0016020(membrane);GO:0016021(integral component of membrane);GO:0070062(extracellular exosome)	NA	NA	NA	transmembrane protein 205 [Source:HGNC Symbol;Acc:HGNC:29631]	0	0	0.575834	0.402372	-inf	-inf	1	1
chr1	-	85495739	85576858	ENST00000467666	lincRNA	4	531	ENSG00000282057	AC092807.3	NA	NA	NA	NA	NA	0	0	0.046197	0.009551	-inf	-inf	1	1
chr15	+	90884523	90895598	ENST00000464684	nonsense_mediated_decay	18	2461	ENSG00000182511	FES	GO:0005737(cytoplasm);GO:0016020(membrane);GO:0000166(nucleotide binding);GO:0004672(protein kinase activity);GO:0005524(ATP binding);GO:0006468(protein phosphorylation);GO:0016740(transferase activity);GO:0016301(kinase activity);GO:0016310(phosphorylation);GO:0005794(Golgi apparatus);GO:0004713(protein tyrosine kinase activity);GO:0005829(cytosol);GO:0005886(plasma membrane);GO:0005856(cytoskel…	04360(Axon guidance)	K07527	EC:2.7.10.2	FES proto-oncogene, tyrosine kinase [Source:HGNC Symbol;Acc:HGNC:3657]	0	0	0.061545	0	-inf	-inf	1	1
chr3	-	160377436	160399216	ENST00000465972	processed_transcript	5	569	ENSG00000068885	IFT80	GO:0005737(cytoplasm);GO:0005856(cytoskeleton);GO:0042995(cell projection);GO:0005813(centrosome);GO:0035735(intraciliary transport involved in cilium assembly);GO:0005929(cilium);GO:0030992(intraciliary transport particle B);GO:0097542(ciliary tip);GO:0060271(cilium assembly)	NA	NA	NA	intraflagellar transport 80 [Source:HGNC Symbol;Acc:HGNC:29262]	0	0	0	0.255633	-inf	-inf	1	1
chr3	+	195720882	195733551	ENST00000447234	protein_coding	4	2589	ENSG00000176945	MUC20	GO:0016020(membrane);GO:0005886(plasma membrane);GO:0042995(cell projection);GO:0005576(extracellular region);GO:0048012(hepatocyte growth factor receptor signaling pathway);GO:0002223(stimulatory C-type lectin receptor signaling pathway);GO:0016323(basolateral plasma membrane);GO:0016324(apical plasma membrane);GO:0005796(Golgi lumen);GO:0031528(microvillus membrane);GO:0051260(protein homooligo…	NA	NA	NA	mucin 20, cell surface associated [Source:HGNC Symbol;Acc:HGNC:23282]	0	0	0	0.172914	-inf	-inf	1	1
chr9	+	71589601	71589933	ENST00000437667	processed_pseudogene	1	333	ENSG00000229814	RPL35AP21	NA	NA	NA	NA	ribosomal protein L35a pseudogene 21 [Source:HGNC Symbol;Acc:HGNC:36814]	0	0	0	0.053611	-inf	-inf	1	1
chr12	+	10212897	10223123	ENST00000540424	nonsense_mediated_decay	6	2321	ENSG00000139112	GABARAPL1	GO:0006914(autophagy);GO:0005737(cytoplasm);GO:0016020(membrane);GO:0005794(Golgi apparatus);GO:0005783(endoplasmic reticulum);GO:0005856(cytoskeleton);GO:0005515(protein binding);GO:0005874(microtubule);GO:0030659(cytoplasmic vesicle membrane);GO:0031410(cytoplasmic vesicle);GO:0032590(dendrite membrane);GO:0032839(dendrite cytoplasm);GO:0044297(cell body);GO:0005829(cytosol);GO:0000045(autophag…	04371(Apelin signaling pathway);04068(FoxO signaling pathway);04140(Autophagy - animal);04136(Autophagy - other eukaryotes);04137(Mitophagy - animal);04621(NOD-like receptor signaling pathway);04727(GABAergic synapse);05167(Kaposi's sarcoma-associated herpesvirus infection)	NA	NA	GABA type A receptor associated protein like 1 [Source:HGNC Symbol;Acc:HGNC:4068]	0	0	0.273605	0.113143	-inf	-inf	1	1
chr2	+	48569020	48679603	ENST00000394754	protein_coding	11	3824	ENSG00000068781	STON1-GTF2A1L	GO:0006897(endocytosis);GO:1903506(regulation of nucleic acid-templated transcription);GO:0006367(transcription initiation from RNA polymerase II promoter);GO:0005672(transcription factor TFIIA complex);GO:0030100(regulation of endocytosis);GO:0003713(transcription coactivator activity);GO:0006366(transcription from RNA polymerase II promoter)	NA	NA	NA	STON1-GTF2A1L readthrough [Source:HGNC Symbol;Acc:HGNC:30651]	0	0	0	0.03811	-inf	-inf	1	1
chr20	-	17565501	17565851	ENST00000610812	sense_intronic	1	351	ENSG00000277373	AL132765.2	NA	NA	NA	NA	NA	0	0	0.057211	0	-inf	-inf	1	1
chr17	+	74737221	74745028	ENST00000577548	retained_intron	6	950	ENSG00000172794	RAB37	GO:0005525(GTP binding);GO:0003924(GTPase activity);GO:0006810(transport);GO:0015031(protein transport);GO:0000166(nucleotide binding);GO:0005515(protein binding);GO:0031410(cytoplasmic vesicle);GO:0005886(plasma membrane);GO:0005768(endosome);GO:0009306(protein secretion);GO:0043312(neutrophil degranulation);GO:0035579(specific granule membrane);GO:0035577(azurophil granule membrane);GO:0005793(…	NA	NA	NA	RAB37, member RAS oncogene family [Source:HGNC Symbol;Acc:HGNC:30268]	0	0	0	0.126924	-inf	-inf	1	1
chr18	+	34978426	35102059	ENST00000588349	protein_coding	5	543	ENSG00000166974	MAPRE2	GO:0008017(microtubule binding);GO:0005737(cytoplasm);GO:0051301(cell division);GO:0005856(cytoskeleton);GO:0005515(protein binding);GO:0007049(cell cycle);GO:0005874(microtubule);GO:0042802(identical protein binding);GO:0007165(signal transduction);GO:0008283(cell proliferation);GO:0015630(microtubule cytoskeleton);GO:0035371(microtubule plus-end)	NA	NA	NA	microtubule associated protein RP/EB family member 2 [Source:HGNC Symbol;Acc:HGNC:6891]	0	0	0.416275	0	-inf	-inf	1	1
chr11	-	57426168	57427043	ENST00000532278	protein_coding	3	506	ENSG00000134802	SLC43A3	GO:0016020(membrane);GO:0016021(integral component of membrane);GO:0055085(transmembrane transport);GO:0003674(molecular_function);GO:0008150(biological_process);GO:0005575(cellular_component)	NA	NA	NA	solute carrier family 43 member 3 [Source:HGNC Symbol;Acc:HGNC:17466]	0	0	0	0.09317	-inf	-inf	1	1
chr6	+	106304176	106304286	ENST00000516635	snRNA	1	111	ENSG00000252444	RNU6-344P	NA	NA	NA	NA	RNA, U6 small nuclear 344, pseudogene [Source:HGNC Symbol;Acc:HGNC:47307]	0	0	0	0.124122	-inf	-inf	1	1
chr2	+	209653171	209730397	ENST00000447185	protein_coding	12	5472	ENSG00000078018	MAP2	GO:0005737(cytoplasm);GO:0005730(nucleolus);GO:0005829(cytosol);GO:0005856(cytoskeleton);GO:0042995(cell projection);GO:0005515(protein binding);GO:0015631(tubulin binding);GO:0001578(microtubule bundle formation);GO:0021954(central nervous system neuron development);GO:0005874(microtubule);GO:0030425(dendrite);GO:0005516(calmodulin binding);GO:0008017(microtubule binding);GO:0043005(neuron proje…	NA	NA	NA	microtubule associated protein 2 [Source:HGNC Symbol;Acc:HGNC:6839]	0	0	0.026431	0	-inf	-inf	1	1
chr1	-	159835350	159854903	ENST00000491974	processed_transcript	3	1064	ENSG00000188004	SNHG28	GO:0003723(RNA binding);GO:0016020(membrane);GO:0016021(integral component of membrane)	NA	NA	NA	small nucleolar RNA host gene 28 [Source:HGNC Symbol;Acc:HGNC:27647]	0	0	0.113122	0	-inf	-inf	1	1
chr2	+	10043829	10054836	ENST00000540845	protein_coding	4	3885	ENSG00000172059	KLF11	GO:0008285(negative regulation of cell proliferation);GO:0043065(positive regulation of apoptotic process);GO:0003676(nucleic acid binding);GO:0005634(nucleus);GO:0046872(metal ion binding);GO:0005829(cytosol);GO:0005654(nucleoplasm);GO:0006351(transcription, DNA-templated);GO:0006355(regulation of transcription, DNA-templated);GO:0003677(DNA binding);GO:0005925(focal adhesion);GO:0005515(protein…	NA	NA	NA	Kruppel like factor 11 [Source:HGNC Symbol;Acc:HGNC:11811]	0	0	0.001654	0	-inf	-inf	1	1
chr2	+	209579609	209693625	ENST00000445941	protein_coding	8	2019	ENSG00000078018	MAP2	GO:0005737(cytoplasm);GO:0005730(nucleolus);GO:0005829(cytosol);GO:0005856(cytoskeleton);GO:0042995(cell projection);GO:0005515(protein binding);GO:0015631(tubulin binding);GO:0001578(microtubule bundle formation);GO:0021954(central nervous system neuron development);GO:0005874(microtubule);GO:0030425(dendrite);GO:0005516(calmodulin binding);GO:0008017(microtubule binding);GO:0043005(neuron proje…	NA	NA	NA	microtubule associated protein 2 [Source:HGNC Symbol;Acc:HGNC:6839]	0	0	0	0.524545	-inf	-inf	1	1
chr16	-	57473901	57484098	ENST00000569010	protein_coding	7	1060	ENSG00000125170	DOK4	GO:0005622(intracellular);GO:0005158(insulin receptor binding);GO:0005057(signal transducer activity, downstream of receptor);GO:0000165(MAPK cascade);GO:0007169(transmembrane receptor protein tyrosine kinase signaling pathway);GO:0007399(nervous system development);GO:0005515(protein binding);GO:0005829(cytosol);GO:0007411(axon guidance)	NA	NA	NA	docking protein 4 [Source:HGNC Symbol;Acc:HGNC:19868]	0	0	0.125296	0	-inf	-inf	1	1
chr2	+	84971093	85028056	ENST00000456682	protein_coding	3	661	ENSG00000176407	KCMF1	GO:0003676(nucleic acid binding);GO:0008270(zinc ion binding);GO:0046872(metal ion binding);GO:0016740(transferase activity);GO:0005576(extracellular region);GO:0043312(neutrophil degranulation);GO:1904813(ficolin-1-rich granule lumen)	NA	NA	NA	potassium channel modulatory factor 1 [Source:HGNC Symbol;Acc:HGNC:20589]	0	0	0.315587	2.68748	-inf	-inf	1	1
chr7	-	112328189	112409623	ENST00000431064	antisense_RNA	4	561	ENSG00000226851	AC004112.1	NA	NA	NA	NA	NA	0	0	0	0.0211	-inf	-inf	1	1
chr9	+	130129591	130133236	ENST00000415344	processed_transcript	2	648	ENSG00000148358	GPR107	GO:0016020(membrane);GO:0016021(integral component of membrane);GO:0005794(Golgi apparatus);GO:0005654(nucleoplasm);GO:0032050(clathrin heavy chain binding);GO:0072583(clathrin-dependent endocytosis);GO:0005769(early endosome);GO:0030136(clathrin-coated vesicle)	NA	NA	NA	G protein-coupled receptor 107 [Source:HGNC Symbol;Acc:HGNC:17830]	0	0	0.046794	0.011679	-inf	-inf	1	1
chr12	-	62334091	62334197	ENST00000363944	snRNA	1	107	ENSG00000200814	RNU6-595P	NA	NA	NA	NA	RNA, U6 small nuclear 595, pseudogene [Source:HGNC Symbol;Acc:HGNC:47558]	0	0	0	0.181354	-inf	-inf	1	1
chr4	+	143381945	143469567	ENST00000505913	protein_coding	10	2477	ENSG00000109458	GAB1	GO:0009967(positive regulation of signal transduction);GO:0005515(protein binding);GO:0036092(phosphatidylinositol-3-phosphate biosynthetic process);GO:0046854(phosphatidylinositol phosphorylation);GO:0005829(cytosol);GO:0046934(phosphatidylinositol-4,5-bisphosphate 3-kinase activity);GO:0007411(axon guidance);GO:0014066(regulation of phosphatidylinositol 3-kinase signaling);GO:0038111(interleuki…	04014(Ras signaling pathway);04012(ErbB signaling pathway);04072(Phospholipase D signaling pathway);04722(Neurotrophin signaling pathway);05205(Proteoglycans in cancer);05225(Hepatocellular carcinoma);05226(Gastric cancer);05211(Renal cell carcinoma);05100(Bacterial invasion of epithelial cells);01521(EGFR tyrosine kinase inhibitor resistance)	K09593	NA	GRB2 associated binding protein 1 [Source:HGNC Symbol;Acc:HGNC:4066]	0	0	0.008269	0	-inf	-inf	1	1
chr2	-	74415597	74417717	ENST00000640371	protein_coding	3	898	ENSG00000284308	C2orf81	GO:0006355(regulation of transcription, DNA-templated)	NA	NA	NA	chromosome 2 open reading frame 81 [Source:HGNC Symbol;Acc:HGNC:34350]	0	0	0.507378	0	-inf	-inf	1	1
chr11	+	118531192	118533525	ENST00000534181	nonsense_mediated_decay	5	586	ENSG00000149582	TMEM25	GO:0016020(membrane);GO:0016021(integral component of membrane);GO:0005886(plasma membrane);GO:0005515(protein binding);GO:0005576(extracellular region)	NA	NA	NA	transmembrane protein 25 [Source:HGNC Symbol;Acc:HGNC:25890]	0	0	0.154326	0.007839	-inf	-inf	1	1
chr9	+	83847563	83849591	ENST00000615485	antisense_RNA	4	742	ENSG00000231616	AL354733.2	NA	NA	NA	NA	NA	0	0	0	0.085055	-inf	-inf	1	1
chr8	+	47979414	47979521	ENST00000410590	snRNA	1	108	ENSG00000222522	RNU6-519P	NA	NA	NA	NA	RNA, U6 small nuclear 519, pseudogene [Source:HGNC Symbol;Acc:HGNC:47482]	0	0	0.131084	0	-inf	-inf	1	1
chr5	-	94568929	94569470	ENST00000520612	processed_pseudogene	1	542	ENSG00000254132	MTND6P3	NA	NA	NA	NA	mitochondrially encoded NADH:ubiquinone oxidoreductase core subunit 6 pseudogene 3 [Source:HGNC Symbol;Acc:HGNC:39466]	0	0	0.000926	0.042963	-inf	-inf	1	1
chr18	+	47501172	47503106	ENST00000625076	TEC	1	1935	ENSG00000279367	AC102797.2	NA	NA	NA	NA	NA	0	0	0	0.004412	-inf	-inf	1	1
chr19	-	40846029	40850447	ENST00000600495	nonsense_mediated_decay	6	931	ENSG00000255974	CYP2A6	GO:0016020(membrane);GO:0046872(metal ion binding);GO:0004497(monooxygenase activity);GO:0016491(oxidoreductase activity);GO:0055114(oxidation-reduction process);GO:0005783(endoplasmic reticulum);GO:0005789(endoplasmic reticulum membrane);GO:0005506(iron ion binding);GO:0016705(oxidoreductase activity, acting on paired donors, with incorporation or reduction of molecular oxygen);GO:0020037(heme b…	00830(Retinol metabolism);00232(Caffeine metabolism);00980(Metabolism of xenobiotics by cytochrome P450);00982(Drug metabolism - cytochrome P450);00983(Drug metabolism - other enzymes);05204(Chemical carcinogenesis)	NA	NA	cytochrome P450 family 2 subfamily A member 6 [Source:HGNC Symbol;Acc:HGNC:2610]	0	0	0	0.02509	-inf	-inf	1	1
chr5	+	132369900	132389005	ENST00000437841	nonsense_mediated_decay	4	850	ENSG00000197375	SLC22A5	GO:0006810(transport);GO:0016020(membrane);GO:0016021(integral component of membrane);GO:0005215(transporter activity);GO:0055085(transmembrane transport);GO:0000166(nucleotide binding);GO:0005524(ATP binding);GO:0015293(symporter activity);GO:0006811(ion transport);GO:0006814(sodium ion transport);GO:0022857(transmembrane transporter activity);GO:0005886(plasma membrane);GO:0015711(organic anion…	05231(Choline metabolism in cancer)	NA	NA	solute carrier family 22 member 5 [Source:HGNC Symbol;Acc:HGNC:10969]	0	0	0	0.083058	-inf	-inf	1	1
chr9	+	62888535	62889921	ENST00000402994	unprocessed_pseudogene	2	292	ENSG00000219693	FGF7P8	NA	NA	NA	NA	fibroblast growth factor 7 pseudogene 8 [Source:HGNC Symbol;Acc:HGNC:34516]	0	0	0	0.035553	-inf	-inf	1	1
chr17	-	76082392	76103695	ENST00000607838	protein_coding	20	3353	ENSG00000182473	EXOC7	GO:0006810(transport);GO:0005737(cytoplasm);GO:0016020(membrane);GO:0015031(protein transport);GO:0006887(exocytosis);GO:0000145(exocyst);GO:0005829(cytosol);GO:0005886(plasma membrane);GO:0005515(protein binding);GO:0030496(midbody);GO:0016241(regulation of macroautophagy);GO:0005815(microtubule organizing center);GO:0034451(centriolar satellite);GO:2000535(regulation of entry of bacterium into …	04910(Insulin signaling pathway)	NA	NA	exocyst complex component 7 [Source:HGNC Symbol;Acc:HGNC:23214]	0	0	0.005237	0.022912	-inf	-inf	1	1
chr5	-	139387595	139388762	ENST00000511979	retained_intron	2	839	ENSG00000170476	MZB1	GO:0005737(cytoplasm);GO:0005783(endoplasmic reticulum);GO:0005576(extracellular region);GO:0006915(apoptotic process);GO:0005788(endoplasmic reticulum lumen);GO:0042127(regulation of cell proliferation);GO:0033622(integrin activation);GO:0034663(endoplasmic reticulum chaperone complex);GO:0002642(positive regulation of immunoglobulin biosynthetic process);GO:0030888(regulation of B cell prolifer…	NA	NA	NA	marginal zone B and B1 cell specific protein [Source:HGNC Symbol;Acc:HGNC:30125]	0	0	0	0.05595	-inf	-inf	1	1
chr17	-	7537096	7537196	ENST00000364619	misc_RNA	1	101	ENSG00000201489	Y_RNA	NA	NA	NA	NA	Y RNA [Source:RFAM;Acc:RF00019]	0	0	0	0.194049	-inf	-inf	1	1
chr8	-	140879480	141002110	ENST00000517453	protein_coding	4	571	ENSG00000169398	PTK2	GO:0030335(positive regulation of cell migration);GO:0005634(nucleus);GO:0005737(cytoplasm);GO:0016020(membrane);GO:0000166(nucleotide binding);GO:0004672(protein kinase activity);GO:0005524(ATP binding);GO:0006468(protein phosphorylation);GO:0005829(cytosol);GO:0016740(transferase activity);GO:0016301(kinase activity);GO:0016310(phosphorylation);GO:0004871(signal transducer activity);GO:0004713(…	04012(ErbB signaling pathway);04370(VEGF signaling pathway);04151(PI3K-Akt signaling pathway);04510(Focal adhesion);04810(Regulation of actin cytoskeleton);04670(Leukocyte transendothelial migration);04062(Chemokine signaling pathway);04360(Axon guidance);05200(Pathways in cancer);05202(Transcriptional misregulation in cancers);05205(Proteoglycans in cancer);05222(Small cell lung cancer);05418(Fl…	NA	NA	protein tyrosine kinase 2 [Source:HGNC Symbol;Acc:HGNC:9611]	0	0	0.065413	0	-inf	-inf	1	1
chr1	+	62601034	62602380	ENST00000482591	processed_transcript	3	373	ENSG00000132855	ANGPTL3	GO:0005615(extracellular space);GO:0042632(cholesterol homeostasis);GO:0051005(negative regulation of lipoprotein lipase activity);GO:0007155(cell adhesion);GO:0006629(lipid metabolic process);GO:0042995(cell projection);GO:0005576(extracellular region);GO:0007229(integrin-mediated signaling pathway);GO:0008201(heparin binding);GO:0030027(lamellipodium);GO:0030335(positive regulation of cell migr…	04979(Cholesterol metabolism)	NA	NA	angiopoietin like 3 [Source:HGNC Symbol;Acc:HGNC:491]	0	0	0.059958	0.113624	-inf	-inf	1	1
chr4	-	99881207	99894376	ENST00000226522	protein_coding	7	1220	ENSG00000109270	LAMTOR3	GO:0016020(membrane);GO:0043547(positive regulation of GTPase activity);GO:0005515(protein binding);GO:0005925(focal adhesion);GO:0005085(guanyl-nucleotide exchange factor activity);GO:0005886(plasma membrane);GO:0071230(cellular response to amino acid stimulus);GO:0005768(endosome);GO:0031902(late endosome membrane);GO:0070062(extracellular exosome);GO:0010008(endosome membrane);GO:0000165(MAPK …	04010(MAPK signaling pathway);04150(mTOR signaling pathway)	K04370	NA	late endosomal/lysosomal adaptor, MAPK and MTOR activator 3 [Source:HGNC Symbol;Acc:HGNC:15606]	0	0	0	0.23688	-inf	-inf	1	1
chr12	-	101728873	101739413	ENST00000392924	protein_coding	9	845	ENSG00000139351	SYCP3	GO:0005634(nucleus);GO:0003677(DNA binding);GO:0051301(cell division);GO:0005694(chromosome);GO:0007049(cell cycle);GO:0051321(meiotic cell cycle);GO:0000775(chromosome, centromeric region);GO:0000800(lateral element);GO:0035093(spermatogenesis, exchange of chromosomal proteins);GO:0007141(male meiosis I);GO:0000795(synaptonemal complex)	03440(Homologous recombination)	K19528	NA	synaptonemal complex protein 3 [Source:HGNC Symbol;Acc:HGNC:18130]	0	0	0	0.096792	-inf	-inf	1	1
chrX	+	23351013	23351450	ENST00000445047	processed_pseudogene	1	438	ENSG00000226774	AC073910.1	NA	NA	NA	NA	NA	0	0	0.138458	0	-inf	-inf	1	1
chr5	-	149348116	149357642	ENST00000521295	antisense_RNA	2	401	ENSG00000253618	GRPEL2-AS1	NA	NA	NA	NA	GRPEL2 antisense RNA 1 [Source:HGNC Symbol;Acc:HGNC:48999]	0	0	0.103727	0.271483	-inf	-inf	1	1
chr11	-	6791736	6799689	ENST00000641196	protein_coding	2	4295	ENSG00000184933	OR6A2	GO:0016020(membrane);GO:0016021(integral component of membrane);GO:0004930(G-protein coupled receptor activity);GO:0007186(G-protein coupled receptor signaling pathway);GO:0005886(plasma membrane);GO:0004871(signal transducer activity);GO:0007165(signal transduction);GO:0004984(olfactory receptor activity);GO:0007608(sensory perception of smell);GO:0050896(response to stimulus);GO:0050911(detecti…	04740(Olfactory transduction)	NA	NA	olfactory receptor family 6 subfamily A member 2 [Source:HGNC Symbol;Acc:HGNC:15301]	0	0	0.000514	0.002009	-inf	-inf	1	1
chr11	-	5253389	5254741	ENST00000444587	protein_coding	3	307	ENSG00000196565	HBG2	GO:0006810(transport);GO:0046872(metal ion binding);GO:0005506(iron ion binding);GO:0020037(heme binding);GO:0005344(oxygen transporter activity);GO:0019825(oxygen binding);GO:0015671(oxygen transport);GO:0005833(hemoglobin complex);GO:0005515(protein binding);GO:0005829(cytosol);GO:0072562(blood microparticle);GO:0007596(blood coagulation)	NA	NA	NA	hemoglobin subunit gamma 2 [Source:HGNC Symbol;Acc:HGNC:4832]	0	0	0	0.060282	-inf	-inf	1	1
chr11	-	65045226	65048433	ENST00000526799	protein_coding	8	959	ENSG00000168060	NAALADL1	GO:0016020(membrane);GO:0016021(integral component of membrane);GO:0046872(metal ion binding);GO:0016787(hydrolase activity);GO:0005886(plasma membrane);GO:0003824(catalytic activity);GO:0008152(metabolic process);GO:0008233(peptidase activity);GO:0006508(proteolysis);GO:0004180(carboxypeptidase activity);GO:0008237(metallopeptidase activity);GO:0016805(dipeptidase activity);GO:0016324(apical pla…	NA	NA	NA	N-acetylated alpha-linked acidic dipeptidase like 1 [Source:HGNC Symbol;Acc:HGNC:23536]	0	0	0	0.0021	-inf	-inf	1	1
chr1	+	209756049	209782315	ENST00000367025	protein_coding	17	2243	ENSG00000009790	TRAF3IP3	GO:0016020(membrane);GO:0016021(integral component of membrane);GO:0005515(protein binding)	NA	NA	NA	TRAF3 interacting protein 3 [Source:HGNC Symbol;Acc:HGNC:30766]	0	0	0	0.010849	-inf	-inf	1	1
chr10	-	68379493	68407236	ENST00000472394	processed_transcript	11	1113	ENSG00000204130	RUFY2	GO:0005634(nucleus);GO:0046872(metal ion binding)	NA	NA	NA	RUN and FYVE domain containing 2 [Source:HGNC Symbol;Acc:HGNC:19761]	0	0	0	0.157608	-inf	-inf	1	1
chr3	+	151499639	151499806	ENST00000491120	processed_pseudogene	1	168	ENSG00000242119	AC117454.1	NA	NA	NA	NA	NA	0	0	0.066937	0	-inf	-inf	1	1
chr6	-	34040705	34100088	ENST00000609443	protein_coding	5	570	ENSG00000124493	GRM4	GO:0016020(membrane);GO:0016021(integral component of membrane);GO:0004930(G-protein coupled receptor activity);GO:0007186(G-protein coupled receptor signaling pathway);GO:0005886(plasma membrane);GO:0004871(signal transducer activity);GO:0007165(signal transduction);GO:0031410(cytoplasmic vesicle);GO:0005887(integral component of plasma membrane);GO:0005622(intracellular);GO:0008066(glutamate re…	04072(Phospholipase D signaling pathway);04080(Neuroactive ligand-receptor interaction);04724(Glutamatergic synapse);04742(Taste transduction)	NA	NA	glutamate metabotropic receptor 4 [Source:HGNC Symbol;Acc:HGNC:4596]	0	0	0	0.100512	-inf	-inf	1	1
chr5	+	33008994	33025724	ENST00000511054	lincRNA	2	599	ENSG00000249102	AC034223.1	NA	NA	NA	NA	NA	0	0	0	0.081092	-inf	-inf	1	1
chr5	+	31532295	31534597	ENST00000515409	retained_intron	2	505	ENSG00000082213	C5orf22	GO:0005515(protein binding)	NA	NA	NA	chromosome 5 open reading frame 22 [Source:HGNC Symbol;Acc:HGNC:25639]	0	0	0.038174	0.020929	-inf	-inf	1	1
chr2	-	63643271	63644038	ENST00000419038	transcribed_processed_pseudogene	1	768	ENSG00000229920	RPS4XP5	NA	NA	NA	NA	ribosomal protein S4X pseudogene 5 [Source:HGNC Symbol;Acc:HGNC:36670]	0	0	0	0.027036	-inf	-inf	1	1
chr14	+	50050368	50051336	ENST00000604187	processed_pseudogene	1	969	ENSG00000270788	PDLIM1P1	NA	NA	NA	NA	PDZ and LIM domain 1 pseudogene 1 [Source:HGNC Symbol;Acc:HGNC:20026]	0	0	0.024039	0.046059	-inf	-inf	1	1
chr19	-	4679837	4685747	ENST00000597900	nonsense_mediated_decay	5	728	ENSG00000142002	DPP9	GO:0005634(nucleus);GO:0005737(cytoplasm);GO:0005829(cytosol);GO:0016787(hydrolase activity);GO:0008233(peptidase activity);GO:0006508(proteolysis);GO:0008236(serine-type peptidase activity);GO:0004177(aminopeptidase activity);GO:0042802(identical protein binding)	NA	NA	NA	dipeptidyl peptidase 9 [Source:HGNC Symbol;Acc:HGNC:18648]	0	0	0	0.144163	-inf	-inf	1	1
chr1	-	119794018	119811580	ENST00000354219	protein_coding	7	1517	ENSG00000134193	REG4	GO:0005737(cytoplasm);GO:0030246(carbohydrate binding);GO:0005576(extracellular region);GO:0008201(heparin binding);GO:2001065(mannan binding)	05226(Gastric cancer)	K22244	NA	regenerating family member 4 [Source:HGNC Symbol;Acc:HGNC:22977]	0	0	0	0.071122	-inf	-inf	1	1
[truncated: 133,747 more rows]
